# Supplementary material for: Chiral cobalt( ii ) complex-promoted asymmetric para -Claisen rearrangement of allyl α-naphthol ethers
Source: Royal Society of Chemistry journal article supplement (doi:10.1039/d3sc05677e), 2023-01-01
Supplement: d3sc05677e1.pdf [file d3sc05677e1.pdf]

# Chiral Cobalt(II) Complex-Promoted Asymmetric *para*-Claisen Rearrangement of Allyl $\alpha$ -Naphthol Ethers

Hongkun Zeng, Lifeng Wang, Zhishan Su, Meijia Ying, Lili Lin\* and Xiaoming Feng\*

*Key Laboratory of Green Chemistry & Technology, Ministry of Education, College of Chemistry,  
Sichuan University, Chengdu 610064, P. R. China.*

E-mail: [lililin@scu.edu.cn](mailto:lililin@scu.edu.cn)

## Table of Contents

|                                                                                   |     |
|-----------------------------------------------------------------------------------|-----|
| 1. General Information .....                                                      | 2   |
| 2. General Procedure for the Synthesis of L <sub>3</sub> -TQCp.....               | 3   |
| 3. Typical Procedure for the Synthesis of Substrates.....                         | 4   |
| 4. General Procedure for Preparation of the Racemic Product.....                  | 5   |
| 5. Representative Experimental Procedure for Asymmetric Catalytic Reactions ..... | 5   |
| 6. Optimization of Reaction Conditions .....                                      | 6   |
| 7. Gram-Scale Synthesis of the Product B1.....                                    | 9   |
| 8. Synthetic Transformation.....                                                  | 9   |
| 9. Non-effect Study .....                                                         | 10  |
| 10. Kinetic Studies .....                                                         | 10  |
| 11. Unsuccessful substrates.....                                                  | 14  |
| 12. X-ray Crystal Data .....                                                      | 14  |
| 13. DFT Calculation of Reaction Mechanism .....                                   | 17  |
| 14. Spectral Characterization Data for the Substrates .....                       | 43  |
| 15. Spectral Characterization Data for the Products.....                          | 59  |
| 16. Copies of NMR Spectra for the Reaction Products.....                          | 104 |
| 17. Copies of NMR Spectra for the Reaction Substrates .....                       | 151 |
| 18. Reference.....                                                                | 200 |

## 1. General Information

Column chromatography was generally performed on silica gel (300–400 mesh) and reactions were monitored with thin-layer chromatography (TLC) using 254 nm UV light. NMR characterization data were collected on Bruker ASCEND™ operating at 400 MHz and 600 MHz for  $^1\text{H}$  NMR, 101 MHz and 151 MHz for  $^{13}\text{C}\{^1\text{H}\}$  NMR (with complete proton decoupling), and 376 MHz and 565 MHz for  $^{19}\text{F}\{^1\text{H}\}$  NMR (with complete proton decoupling).  $^1\text{H}$  NMR and  $^{13}\text{C}\{^1\text{H}\}$  NMR: chemical shifts  $\delta$  were recorded in ppm relative to tetramethylsilane and internally referenced to the residual solvent signal (for  $^1\text{H}$  NMR:  $\text{CDCl}_3 = 7.26$  ppm,  $(\text{CD}_3)_2\text{CO} = 2.05$  ppm; for  $^{13}\text{C}$  NMR:  $\text{CDCl}_3 = 77.0$  ppm,  $(\text{CD}_3)_2\text{CO} = 206.3$  ppm). Spectra were reported as follows: chemical shift ( $\delta$  ppm), multiplicity (s = singlet, d = doublet, t = triplet, q = quartet, dd = doublet of doublets, td = triplet of doublets, dt = doublet of triplets, ddd = doublet of doublet of doublets, m = multiplet, hept = heptet), coupling constants (Hz), integration and assignment. High-resolution mass spectra (HRMS) were performed on Thermo Q-Exactive Focus (FTMS+c ESI) and data were reported as (m/z). Enantiomeric excesses (ee) were determined by HPLC or supercritical fluid chromatography (SFC) analysis using the corresponding commercial chiral column as stated in the experimental procedures at 25 °C with PDA detector. Optical rotations were measured on Rudolph Research Analytic Automatic Polarimeter, and reported as follows:  $[\alpha]_D^{25}$  (c g/100 mL, in solvent). Infrared spectra (IR) were recorded on Bruker Tensor II spectrometer with Platinum ATR accessory and the peaks are reported as absorption maxima ( $\nu$ ,  $\text{cm}^{-1}$ ). All catalytic reactions were run under air conditions. Tetrahydrofuran (THF) and toluene were distilled from sodium benzophenone ketyl. 1,1,2,2-TCE, Ethyl acetate (EtOAc), dichloromethane (DCM), and chloroform ( $\text{CHCl}_3$ ) were distilled over  $\text{CaH}_2$ .  $\text{Co}(\text{BF}_4)_2 \cdot 6\text{H}_2\text{O}$  was purchased from Sigma-Aldrich. The  $N,N$ -dioxides,<sup>1</sup> C4-substituted 1-naphthols,<sup>2</sup> were prepared according to the methods reported in the literature were prepared according to the methods reported in the literature.

## 2. General Procedure for the Synthesis of L<sub>3</sub>-TQCp

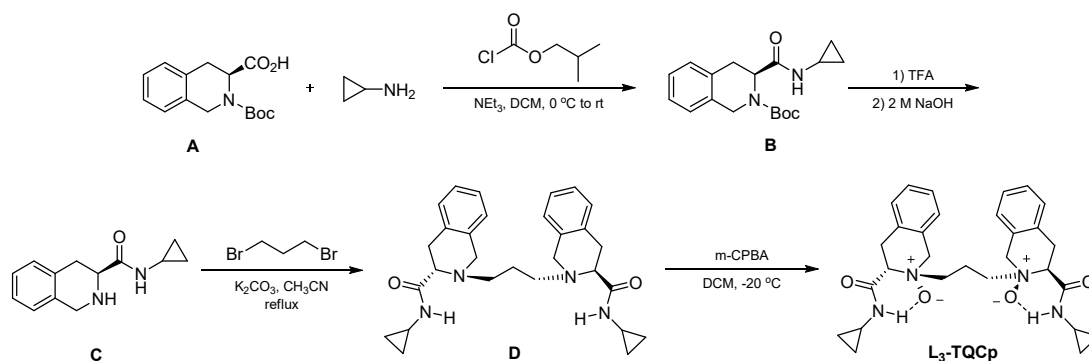

To a solution of (*S*)-Boc-tetrahydroisoquinoline-3-carboxylic acid (5.54 g, 20.0 mmol) in DCM (40 mL) was added Et<sub>3</sub>N (2.43 g, 24.0 mmol), isobutyl carbonochloridate (3.28 g, 24.0 mmol) at 0 °C under stirring. After 15 min, cyclopropylamine (1.37 g, 24.0 mmol) was added. The reaction was allowed to warm to room temperature and detected by TLC. After 48 h, the mixture was washed with 1 M KHSO<sub>4</sub> solution, saturated NaHCO<sub>3</sub> solution, brine, dried over anhydrous Na<sub>2</sub>SO<sub>4</sub>. After filtration, the mixture was concentrated, and the residue was used in the next step without purification.

The residue in CH<sub>2</sub>Cl<sub>2</sub> (10 mL) was added TFA (20 mL) at 0 °C. The reaction was allowed to warm to room temperature and stirred for 1 h. The reaction was diluted with CH<sub>2</sub>Cl<sub>2</sub> (20 mL). The pH value of the mixture was brought into the range of 10–12 by the addition of 2 M NaOH solution at 0 °C. The aqueous phase was extracted with CH<sub>2</sub>Cl<sub>2</sub> (3 × 20 mL). The combined organic phase was washed with brine, dried over anhydrous Na<sub>2</sub>SO<sub>4</sub> and evaporated in vacuo. The residue was subjected to flash column chromatography on silica gel and eluted with EtOAc to afford the product **C** (3.05 g, 14.13 mmol) as a white solid.

To a solution of compound **C** (3.05 g, 14.13 mmol) in CH<sub>3</sub>CN (8 mL) was added K<sub>2</sub>CO<sub>3</sub> (5.85 g, 42.4 mmol) and 1,3-dibromopropane (1.43 g, 7.07 mmol). It was kept refluxing for 12 h. Then, K<sub>2</sub>CO<sub>3</sub> was removed by filtration and washed by CH<sub>2</sub>Cl<sub>2</sub>. The filtrate was concentrated and was subjected to flash column chromatography on silica gel and eluted with Pet/EtOAc (1:1 – 1:4, v/v) to give the product **D** (3.08 g, 6.53 mmol) as a white solid.

To a solution of compound **D** (0.94 g, 2.0 mmol) in CH<sub>2</sub>Cl<sub>2</sub> (30 mL) was slowly added mixed solid of *m*-CPBA (0.862 g, 5 mmol) at -20 °C. The reaction mixture was stirred at -20 °C for 1 h. Then the reaction was concentrated and was subjected to flash column chromatography on silica gel and eluted with EtOAc/MeOH (10:1 – 1:2, v/v) to afford **L<sub>3</sub>-TQCp** (0.61 g, 1.21 mmol) as a white solid.

### 3. Typical Procedure for the Synthesis of Substrates

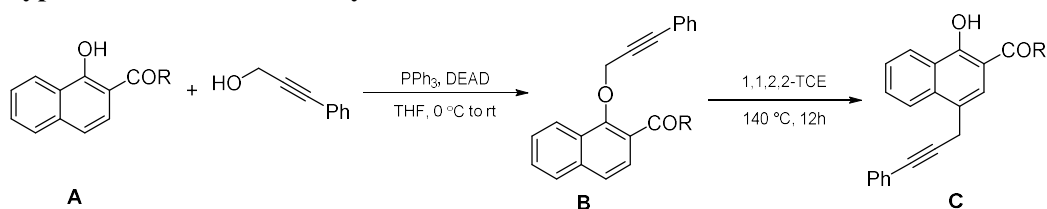

To a solution of naphthol (1.0 equiv), propargyl alcohol (1.2 equiv) and  $\text{PPh}_3$  (1.5 equiv) in dry THF (4.0 mL/mmol of naphthol) at 0 °C, diethyl azodicarboxylate (1.5 equiv) was added dropwise. The reaction mixture was stirred at room temperature and detected by TLC. After removing the solvent under vacuo, the residue was subjected to flash column chromatography on silica gel and eluted with petroleum ether/ethyl acetate (50:1 – 10:1, v/v) to afford the product **B**.

A round-bottomed flask was charged with product **B**, followed by the addition of 1,1,2,2-TCE (0.2 M). The reaction mixture was stirred at 140 °C for 16 h. After removing the solvent under vacuo, the residue was subjected to flash column chromatography on silica gel and eluted with petroleum ether/ethyl acetate (50:1 – 10:1, v/v) to give the crude product, then wash with petroleum ether to afford product **C**.

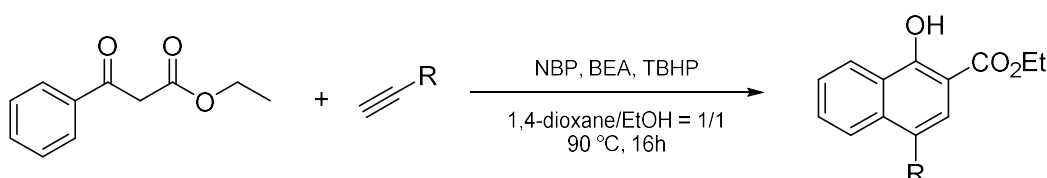

A round-bottomed flask was charged with ethyl benzoylacetate (10 mmol, 1.92 g, 1.0 equiv), alkyne (20 mmol, 2.0 equiv), N-bromophthalimide (NBP, 2 mmol, 0.45 g, 0.2 equiv), 2-bromoethylamine hydrobromide (BEA, 3 mmol, 0.62 g, 0.3 equiv) and 1-butyl hydroperoxide (TBHP, 35 mmol, 3.5 equiv), followed by the addition of 1,4-dioxane (20 ml) and EtOH (20ml). The reaction mixture was stirred at 90 °C for 16 h. After removing the solvent under vacuo, the residue was subjected to flash column chromatography on silica gel and eluted with petroleum ether/ethyl acetate (50:1 – 10:1, v/v) to give the corresponding naphthol products.

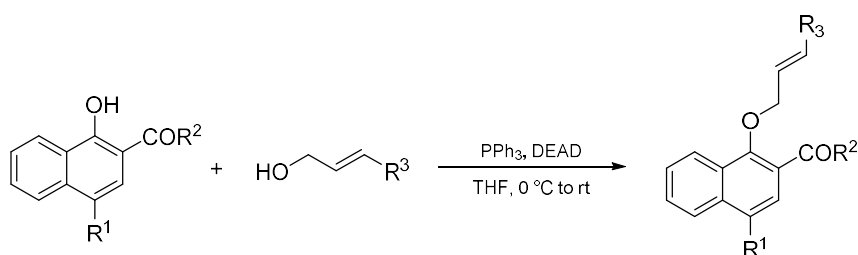

To a solution of naphthol (1.0 equiv), allyl alcohol (1.2 equiv) and  $\text{PPh}_3$  (1.5 equiv) in dry THF (4.0 mL/mmol of naphthol) at 0 °C, diethyl azodicarboxylate (1.5 equiv) was added dropwise. The reaction mixture was stirred at room temperature and detected by TLC. After removing the solvent under vacuo, the residue was subjected to flash column chromatography on silica gel and eluted with petroleum ether/ethyl acetate (50:1 – 10:1, v/v) to afford the product.



#### 4. General Procedure for Preparation of the Racemic Product

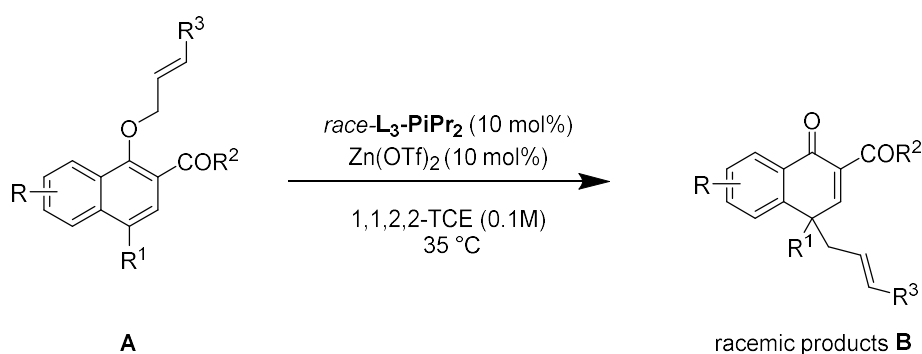

A dry reaction tube was charged with *rac*-L<sub>3</sub>-PiPr<sub>2</sub> (4.8 mg, 10 mol%) and Zn(OTf)<sub>2</sub> (3.6 mg, 10 mol%) followed by the addition of 1,1,2,2-TCE (1.0 mL). The mixture was stirred at 35 °C for 30 min followed by addition of the substrate **A** (0.1 mmol). The reaction mixture was stirred at 35 °C and detected by TLC. The reaction mixture was subjected to column chromatography on silica gel and eluted with petroleum ether/ethyl acetate (8/1 and 4/1, v/v) to afford the desired racemic products **B**.

#### 5. Representative Experimental Procedure for Asymmetric Catalytic Reactions

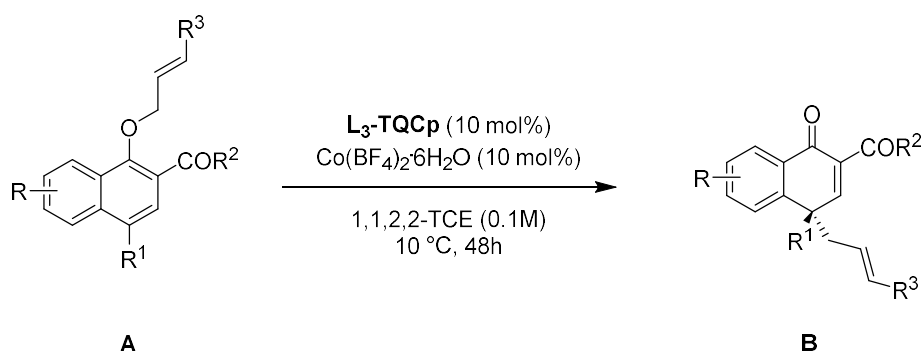

A dry reaction tube was charged with L<sub>3</sub>-TQCp (5.0 mg, 10 mol%) and Co(BF<sub>4</sub>)<sub>2</sub>·6H<sub>2</sub>O (3.4 mg, 10 mol%) followed by the addition of 1,1,2,2-TCE (1.0 mL). The mixture was stirred at 35 °C for 60 min followed by addition of the substrate **A** (0.1 mmol). The reaction mixture was stirred at 10 °C for 48 h. The reaction mixture was subjected to column chromatography on silica gel and eluted with petroleum ether/ethyl acetate (8/1 and 4/1, v/v) to afford the corresponding products **B**.

## 6. Optimization of Reaction Conditions

**Table S1:** Screening of metal salts<sup>[a]</sup>.

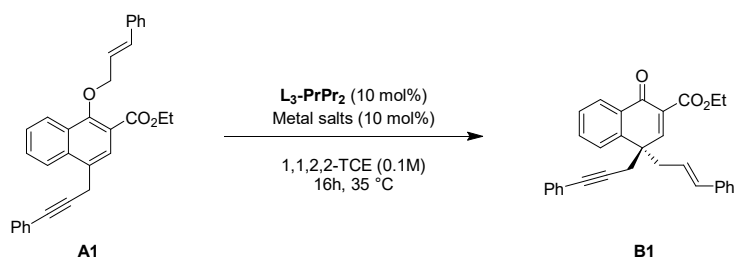

| Entry <sup>[a]</sup> | Metal salts                                           | Yield [%] <sup>[b]</sup> | ee [%] <sup>[c]</sup> |
|----------------------|-------------------------------------------------------|--------------------------|-----------------------|
| 1                    | Zn(OTf) <sub>2</sub>                                  | 48                       | 9                     |
| 2                    | Mg(OTf) <sub>2</sub>                                  | 47                       | 39                    |
| 3                    | Co(OTf) <sub>2</sub>                                  | 45                       | 50                    |
| 4                    | Ni(OTf) <sub>2</sub>                                  | 31                       | 39                    |
| 5                    | Co(BF <sub>4</sub> ) <sub>2</sub> ·6H <sub>2</sub> O  | 47                       | 56                    |
| 6                    | Co(ClO <sub>4</sub> ) <sub>2</sub> ·8H <sub>2</sub> O | 64                       | 40                    |

[a] Unless otherwise noted, all reactions were carried out with **A1** (0.05 mmol), **L<sub>3</sub>-PrPr<sub>2</sub>**/metal salts (1:1, 10 mol %) in 1,1,2,2-TCE (0.1 M) at 35 °C for 16 h. [b] Yield of isolated product. [c] Determined by HPLC analysis on a chiral stationary phase. 1,1,2,2-TCE = 1,1,2,2-Tetrachloroethane.

**Table S2:** Screening of solvents<sup>[a]</sup>.

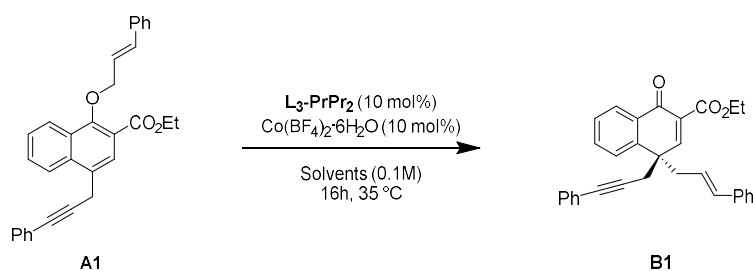

| Entry <sup>[a]</sup> | Solvents           | Yield [%] <sup>[b]</sup> | ee [%] <sup>[c]</sup> |
|----------------------|--------------------|--------------------------|-----------------------|
| 1                    | 1,1,2,2-TCE        | 47                       | 56                    |
| 2                    | DCM                | 32                       | 51                    |
| 3                    | DCE                | 41                       | 55                    |
| 4                    | CHCl <sub>3</sub>  | 50                       | 45                    |
| 5                    | EA                 | 18                       | 7                     |
| 6                    | Toluene            | 11                       | 30                    |
| 7                    | THF                | Trace                    | ND                    |
| 8                    | CH <sub>3</sub> CN | 12                       | 13                    |

[a] Unless otherwise noted, all reactions were carried out with **A1** (0.05 mmol), **L<sub>3</sub>-PrPr<sub>2</sub>**/Co(BF<sub>4</sub>)<sub>2</sub>·6H<sub>2</sub>O (1:1, 10 mol %) in solvent (0.1 M) at 35 °C for 16 h. [b] Yield of isolated product. [c] Determined by HPLC analysis on a chiral stationary phase. 1,1,2,2-TCE = 1,1,2,2-Tetrachloroethane, DCM = Dichloromethane, DCE = 1,2-Dichloroethane, EA = Ethyl acetate, THF = Tetrahydrofuran, ND = not detected.

**Table S3:** Screening of ligands<sup>[a]</sup>.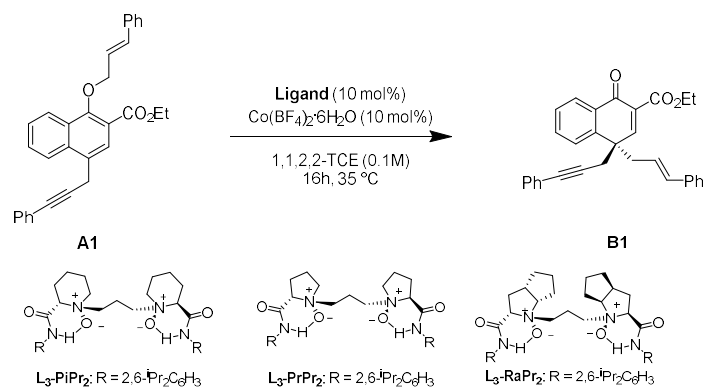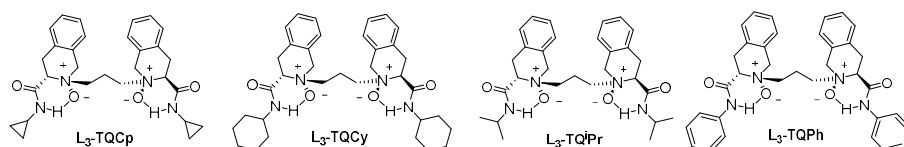

| Entry <sup>[a]</sup> | Ligand                                | Yield [%] <sup>[b]</sup> | ee [%] <sup>[c]</sup> |
|----------------------|---------------------------------------|--------------------------|-----------------------|
| 1                    | <b>L<sub>3</sub>-PrPr<sub>2</sub></b> | 47                       | 56                    |
| 2                    | <b>L<sub>3</sub>-PiPr<sub>2</sub></b> | 56                       | 35                    |
| 3                    | <b>L<sub>3</sub>-RaPr<sub>2</sub></b> | 17                       | 37                    |
| 4                    | <b>L<sub>3</sub>-TQPh</b>             | 50                       | 45                    |
| 5                    | <b>L<sub>3</sub>-TQCy</b>             | Decomposed               | --                    |
| 6                    | <b>L<sub>3</sub>-TQ<sup>i</sup>Pr</b> | Decomposed               | --                    |
| 7                    | <b>L<sub>3</sub>-TQCp</b>             | Decomposed               | --                    |

[a] Unless otherwise noted, all reactions were carried out with **A1** (0.05 mmol), ligand/Co(BF<sub>4</sub>)<sub>2</sub>·6H<sub>2</sub>O (1:1, 10 mol %) in 1,1,2,2-TCE (0.1 M) at 35 °C for 16 h. [b] Yield of isolated product. [c] Determined by HPLC analysis on a chiral stationary phase. 1,1,2,2-TCE = 1,1,2,2-Tetrachloroethane.

**Table S4:** Screening of ligands<sup>[a]</sup>.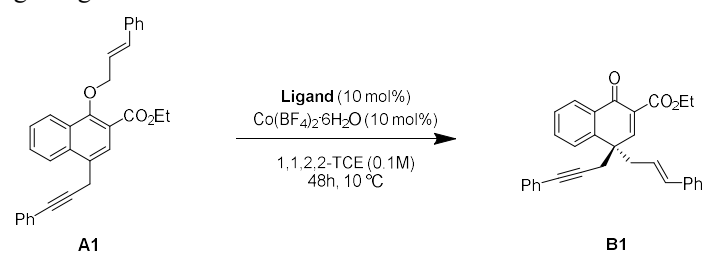

| Entry <sup>[a]</sup> | Ligand                                | Yield [%] <sup>[b]</sup> | ee [%] <sup>[c]</sup> |
|----------------------|---------------------------------------|--------------------------|-----------------------|
| 1                    | <b>L<sub>3</sub>-PrPr<sub>2</sub></b> | <5                       | 63                    |
| 2                    | <b>L<sub>3</sub>-PiPr<sub>2</sub></b> | 13                       | 57                    |
| 3                    | <b>L<sub>3</sub>-RaPr<sub>2</sub></b> | <5                       | 55                    |
| 4                    | <b>L<sub>3</sub>-TQPh</b>             | 73                       | 74                    |
| 5                    | <b>L<sub>3</sub>-TQCy</b>             | 78                       | 82                    |
| 6                    | <b>L<sub>3</sub>-TQ<sup>i</sup>Pr</b> | 87                       | 85                    |
| 7                    | <b>L<sub>3</sub>-TQCp</b>             | 86                       | 92                    |
| 8 <sup>[d]</sup>     | <b>L<sub>3</sub>-TQCp</b>             | 85                       | 88                    |

[a] Unless otherwise noted, all reactions were carried out with **A1** (0.05 mmol), ligand/ $\text{Co}(\text{BF}_4)_2 \cdot 6\text{H}_2\text{O}$  (1:1, 10 mol %) in 1,1,2,2-TCE (0.1 M) at 10 °C for 48 h. [b] Yield of isolated product. [c] Determined by HPLC analysis on a chiral stationary phase. [d] Reaction was performed at 20 °C for 16 h. 1,1,2,2-TCE = 1,1,2,2-Tetrachloroethane.

**Table S5:** Screening of solvents<sup>[a]</sup>.

| Entry <sup>[a]</sup> | Solvents               | Yield [%] <sup>[b]</sup> | ee [%] <sup>[c]</sup> |
|----------------------|------------------------|--------------------------|-----------------------|
| 1                    | 1,1,2,2-TCE            | 86                       | 92                    |
| 2                    | DCM                    | 83                       | 69                    |
| 3                    | DCE                    | 87                       | 77                    |
| 4                    | $\text{CHCl}_3$        | 82                       | 88                    |
| 5                    | EA                     | Trace                    | ND                    |
| 6                    | Toluene                | NR                       | --                    |
| 7                    | THF                    | NR                       | --                    |
| 8                    | $\text{CH}_3\text{CN}$ | 60                       | 11                    |

[a] Unless otherwise noted, all reactions were carried out with **A1** (0.05 mmol),  $\text{L}_3\text{-TQCp}/\text{Co}(\text{BF}_4)_2 \cdot 6\text{H}_2\text{O}$  (1:1, 10 mol %) in solvent (0.1 M) at 10 °C for 48 h. [b] Yield of isolated product. [c] Determined by HPLC analysis on a chiral stationary phase. 1,1,2,2-TCE = 1,1,2,2-Tetrachloroethane, DCM = Dichloromethane, DCE = 1,2-Dichloroethane, EA = Ethyl acetate, THF = Tetrahydrofuran, ND = not detected, ND = not detected, NR = no reaction.

**Table S6:** Screening of metal salts<sup>[a]</sup>.

| Entry <sup>[a]</sup> | Metal salts                                           | Yield [%] <sup>[b]</sup> | ee [%] <sup>[c]</sup> |
|----------------------|-------------------------------------------------------|--------------------------|-----------------------|
| 1                    | $\text{Co}(\text{BF}_4)_2 \cdot 6\text{H}_2\text{O}$  | 86                       | 92                    |
| 2                    | $\text{Co}(\text{ClO}_4)_2 \cdot 8\text{H}_2\text{O}$ | 82                       | 91                    |
| 3                    | $\text{Co}(\text{OTf})_2$                             | 83                       | 86                    |
| 4                    | $\text{CoCl}_2$                                       | Trace                    | ND                    |
| 5                    | $\text{Zn}(\text{OTf})_2$                             | 89                       | 85                    |
| 6                    | $\text{Mg}(\text{OTf})_2$                             | 90                       | 89                    |
| 7                    | $\text{Ni}(\text{OTf})_2$                             | 91                       | 89                    |

[a] Unless otherwise noted, all reactions were carried out with **A1** (0.05 mmol),  $\text{L}_3\text{-TQCp}/\text{metal salts}$  (1:1, 10 mol %) in 1,1,2,2-TCE (0.1 M) at 10 °C for 48 h. [b] Yield of isolated product. [c] Determined by HPLC analysis on a chiral stationary phase. 1,1,2,2-TCE = 1,1,2,2-Tetrachloroethane, ND = not detected.

## 7. Gram-Scale Synthesis of the Product B1

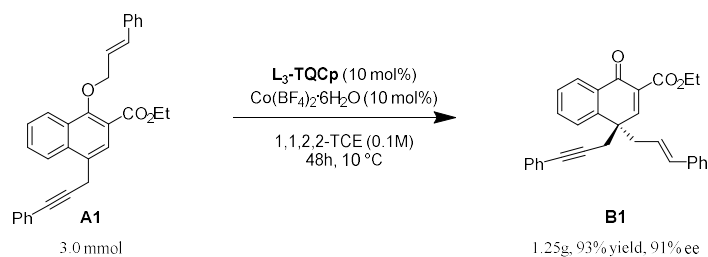

An oven dried round-bottom flask (100 mL) was charged with **L<sub>3</sub>-TQCp** (153.5 mg, 10 mol%) and  $\text{Co}(\text{BF}_4)_2 \cdot 6\text{H}_2\text{O}$  (102.0 mg, 10 mol%) followed by the addition of 1,1,2,2-TCE (30.0 mL). The mixture was stirred at 35 °C for 60 min followed by addition of the substrate **A1** (1.338 g, 3 mmol). The reaction mixture was stirred at 10 °C for 48 h. The reaction mixture was subjected to column chromatography on silica gel and eluted with petroleum ether/ethyl acetate (8/1 and 4/1, v/v) to afford the corresponding products **B1**, in 93% yield (1.247 g) with 91% ee.

## 8. Synthetic Transformation

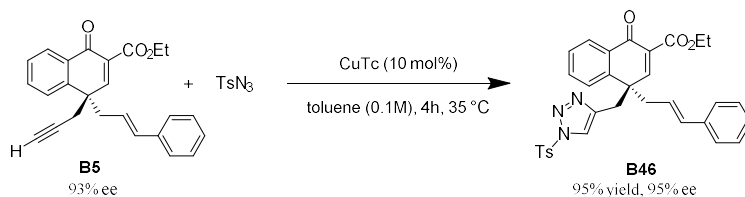

To a solution of Copper(I) thiophene-2-carboxylate (2.1 mg, 0.011 mmol) and **B5** (40.7 mg, 0.11 mmol) in toluene (1.1 mL) was added *p*-toluenesulfonyl azide (25.6 mg, 0.13 mmol), and the reaction was stirred at 35 °C for 4 h. The residue was subjected to flash column chromatography on silica gel and eluted with Pet/EtOAc (2:1, v/v) to yield the product **B46** (59.4 mg, 95% yield, 95% ee).

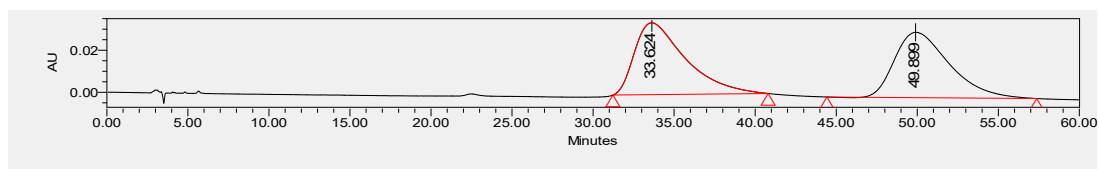

|   | Retention Time | Area    | % Area |
|---|----------------|---------|--------|
| 1 | 33.624         | 7446017 | 50.39  |
| 2 | 49.899         | 7330952 | 49.61  |

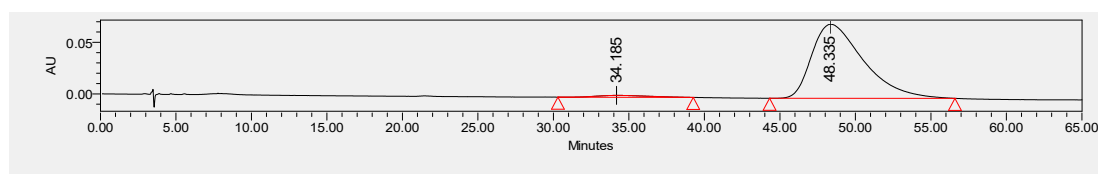

|   | Retention Time | Area     | % Area |
|---|----------------|----------|--------|
| 1 | 34.185         | 429532   | 2.45   |
| 2 | 48.335         | 17081735 | 97.55  |

## 9. Non-effect Study

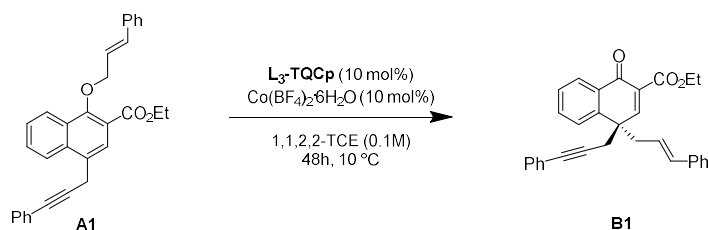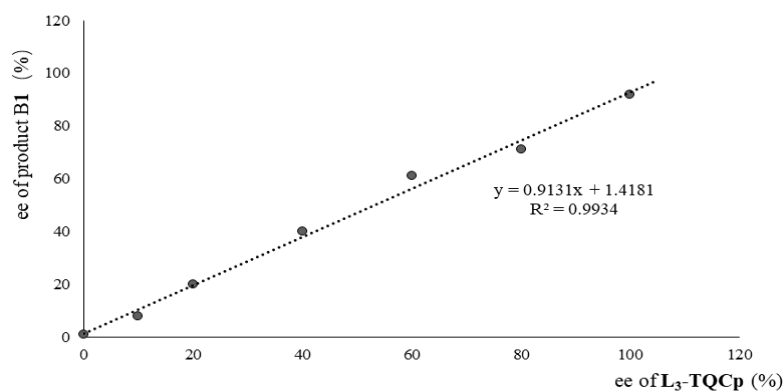

| Entry <sup>[a]</sup> | Ee of L <sub>3</sub> -TQCp [%] | Yield [%] <sup>[b]</sup> | ee [%] <sup>[c]</sup> |
|----------------------|--------------------------------|--------------------------|-----------------------|
| 1                    | 0                              | 86                       | 1                     |
| 2                    | 10                             | 87                       | 8                     |
| 3                    | 20                             | 86                       | 20                    |
| 4                    | 40                             | 84                       | 40                    |
| 5                    | 60                             | 87                       | 61                    |
| 6                    | 80                             | 85                       | 71                    |
| 7                    | 100                            | 86                       | 91                    |

[a] Unless otherwise noted, all reactions were carried out with **A1** (0.1 mmol), L<sub>3</sub>-TQCp/Co(BF<sub>4</sub>)<sub>2</sub>·6H<sub>2</sub>O (1:1, 10 mol %) in 1,1,2,2-TCE (0.1 M) at 10 °C for 48 h. [b] Yield of isolated product. [c] Determined by HPLC analysis on a chiral stationary phase. 1,1,2,2-TCE = 1,1,2,2-Tetrachloroethane.

## 10. Kinetic Studies

Procedure of react IR experiment for kinetic studies of **A1** and L<sub>3</sub>-TQCp/Co(BF<sub>4</sub>)<sub>2</sub>·6H<sub>2</sub>O catalyst. Kinetic analysis was performed using in situ attenuated total reflectance Fouriertransform infrared (ATR FTIR) spectroscopy to track the generation of the reactant **B1** under synthetically relevant conditions. A Mettler Toledo SW License iC IR 701L instrument was treated as main experiment equipment. All the kinetic experiments on each plot were performed using a single batch of reagents.

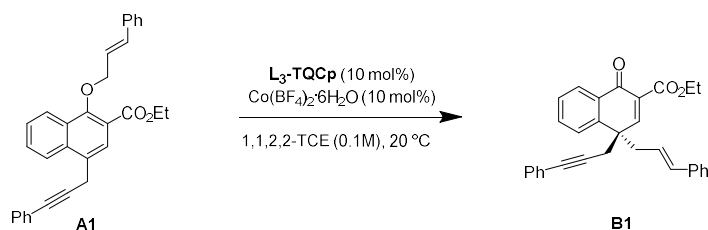

First, the infrared absorption spectra of each reactant **A1** and product **B1** in 1,1,2,2-TCE (1.0 mL) were collected. The following figure shows the absorption of each participant minus the absorption of solvent. Peak at  $1663\text{ cm}^{-1}$  was identified as the characteristic absorption of product **B1**. Then **L<sub>3</sub>-TQCp** and  $\text{Co}(\text{BF}_4)_2 \cdot 6\text{H}_2\text{O}$  were added to the test tube and dissolved in 1,1,2,2-TCE (3.0 mL), the mixture was stirred at  $35\text{ }^\circ\text{C}$  for 60 min. Finally, **A1** (dissolved in 1,1,2,2-TCE (2.0 mL)) was added to the test tube. The reaction mixture was allowed to stir at  $20\text{ }^\circ\text{C}$ . Reaction progression was monitored by the increasing absorbance of **B1** at  $1663\text{ cm}^{-1}$ .

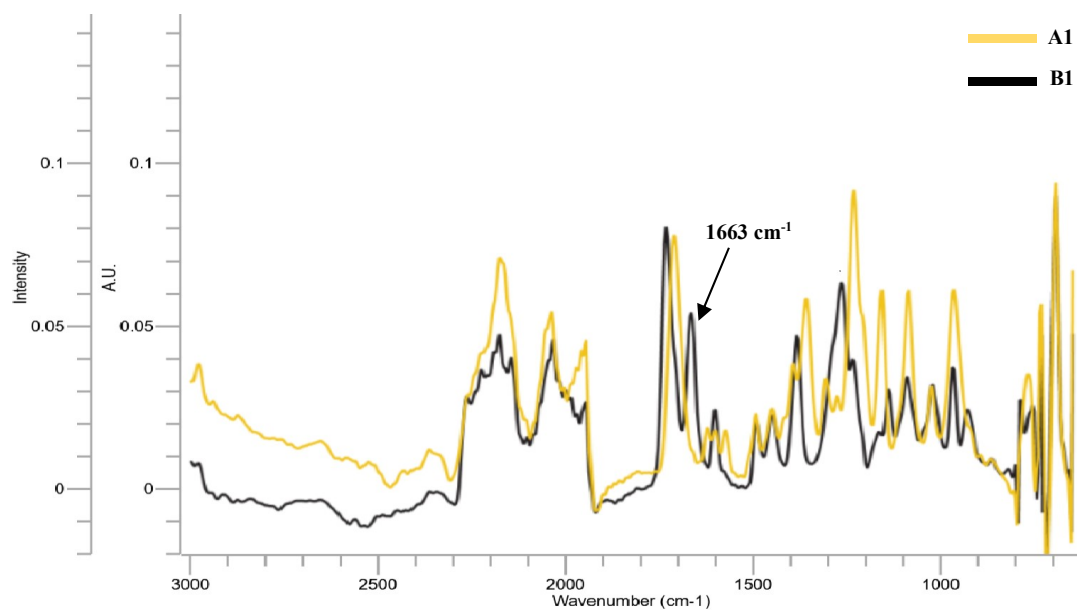

**Figure S1.** Absorption spectra of **A1** (0.1 mmol) and **B1** (0.1 mmol) in 1,1,2,2-TCE (1.0 mL)

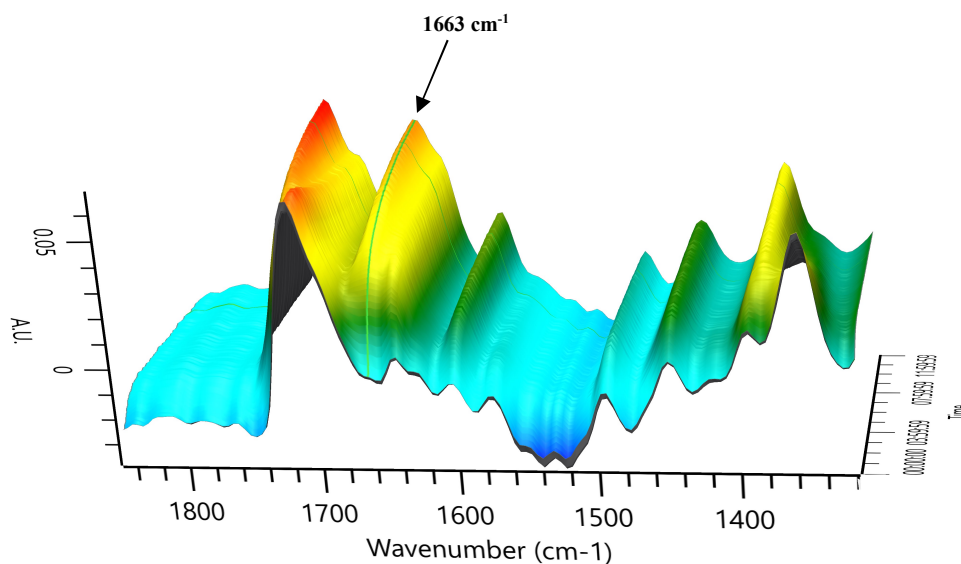

**Figure S2.** 3D ATR-FTIR profile of the catalytic asymmetric reaction **B1**.

### 10.1 Dependence of the reaction rate on concentration of $L_3\text{-TQCp/Co(BF}_4)_2 \cdot 6\text{H}_2\text{O}$ catalyst.

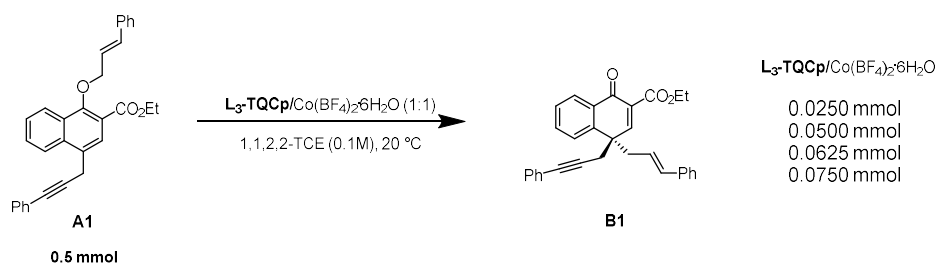

Kinetic profiles of different initial concentration of  $L_3\text{-TQCp/Co(BF}_4)_2 \cdot 6\text{H}_2\text{O}$  (from 0.005 M to 0.015 M), The plot of  $k_{\text{obs}}$  vs  $L_3\text{-TQCp/Co(BF}_4)_2 \cdot 6\text{H}_2\text{O}$  displayed a liner relationship, which indicates a first-order kinetic dependence in  $L_3\text{-TQCp/Co(BF}_4)_2 \cdot 6\text{H}_2\text{O}$ .

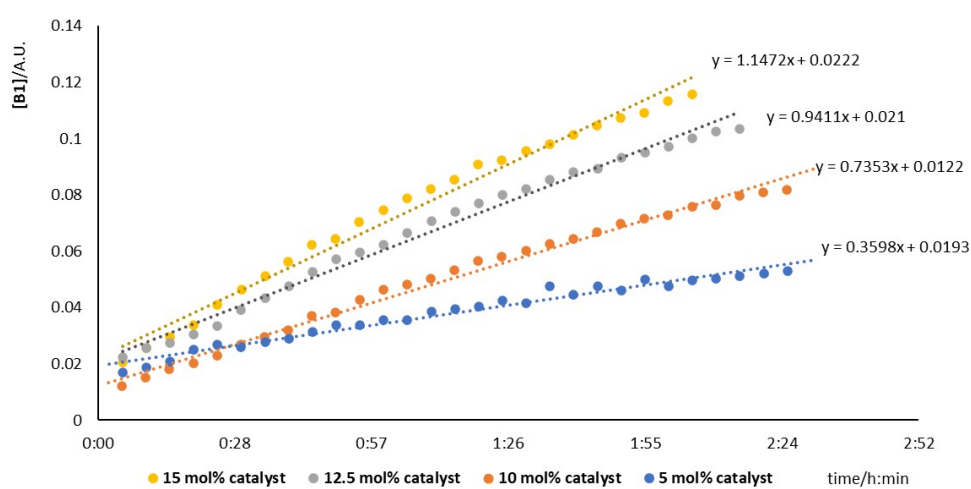

| catalyst/M | reaction rate/(A.U./h) |
|------------|------------------------|
| 0.0050     | 0.3598                 |
| 0.0100     | 0.7353                 |
| 0.0125     | 0.9411                 |
| 0.0150     | 1.1472                 |

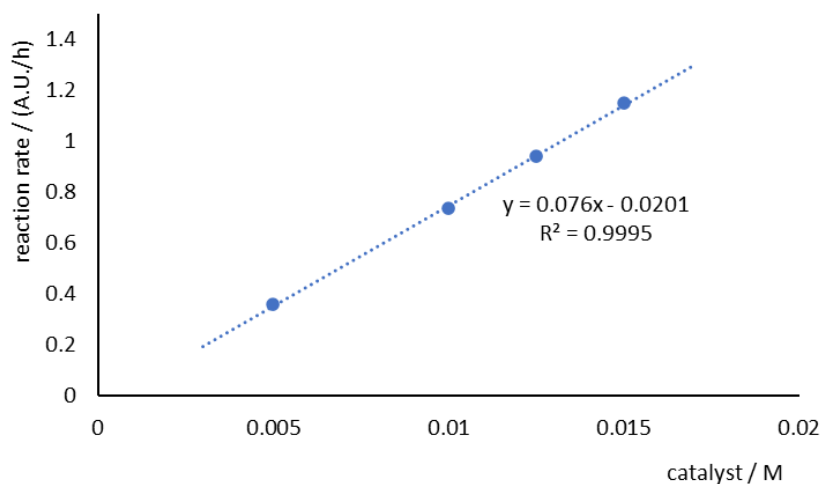



## 10.2 Dependence of the reaction rate on concentration of A1.

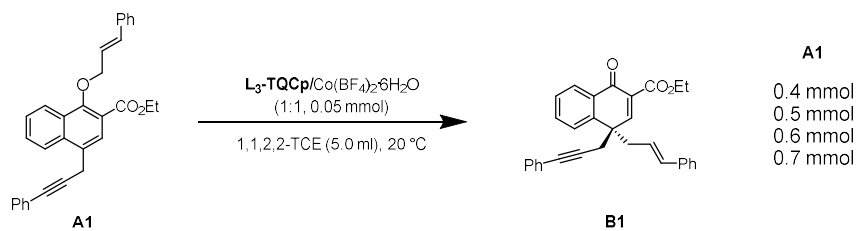

Kinetic profiles of different initial concentration of **A1** (from 0.08 M to 0.14 M), The plot of  $k_{\text{obs}}$  vs **A1** displayed a liner relationship, which indicates a first-order kinetic dependence in **A1**.

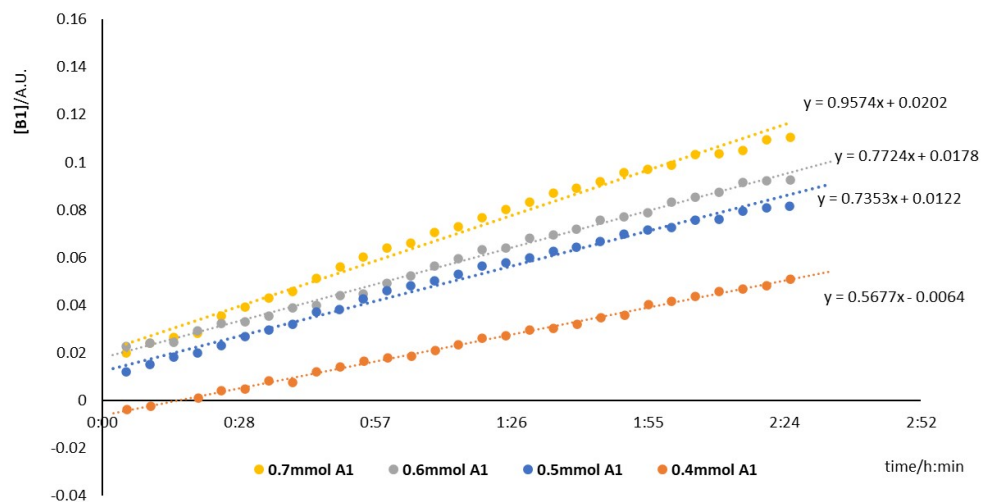

| <b>A1/M</b> | reaction rate/(A.U./h) |
|-------------|------------------------|
| 0.080       | 0.5677                 |
| 0.010       | 0.7353                 |
| 0.012       | 0.7724                 |
| 0.014       | 0.9574                 |

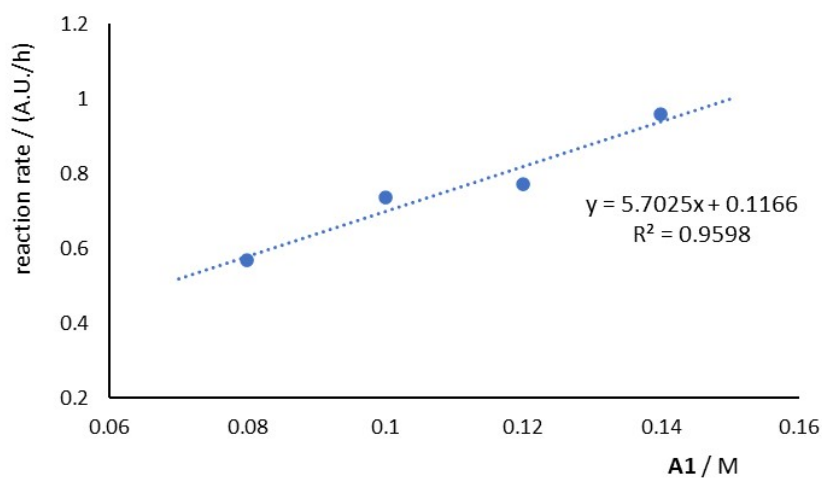

## 11. Unsuccessful substrates

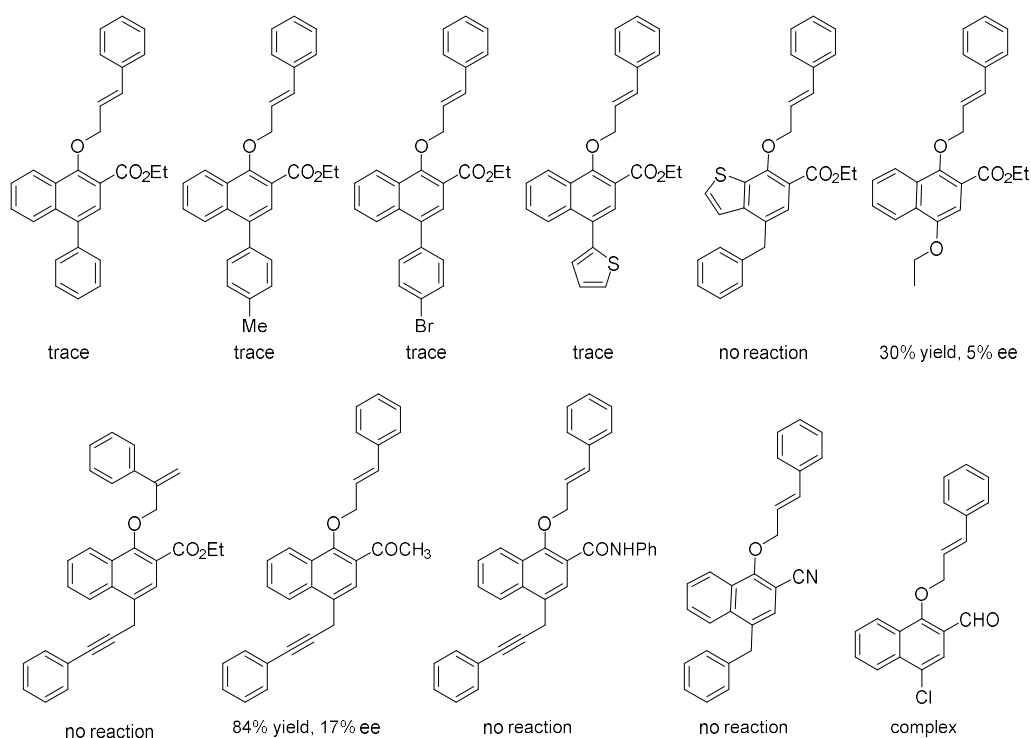

## 12. X-ray Crystal Data

The structure of product **B1** was determined by X-ray chromatography analysis. A single crystal of **B1** was obtained by recrystallization in dichloromethane and petroleum ether at room temperature. The crystal data and further details are listed in **Table S7**. CCDC 2289879 (**B1**) contains the supplementary crystallographic data for this paper. These data are provided free of charge by The Cambridge Crystallographic Data Centre.

The colourless crystal in flake-shape, with approximate dimensions of  $0.100 \times 0.299 \times 0.391 \text{ mm}^3$ , was selected and mounted for the single-crystal X-ray diffraction. The data set was collected by Bruker D8 Venture Photon II diffractometer at 173(2)K equipped with micro-focus Cu radiation source ( $K_{\alpha} = 1.54178\text{\AA}$ ). Applied with face-indexed numerical absorption correction, the structure solution was solved and refinement was processed by SHELXTL (version 6.14) and OLEX 2.3 program package<sup>a, b, c</sup>. The structure was analyzed by ADDSYM routine implemented in PLATON suite and no higher symmetry was suggested<sup>c</sup>.

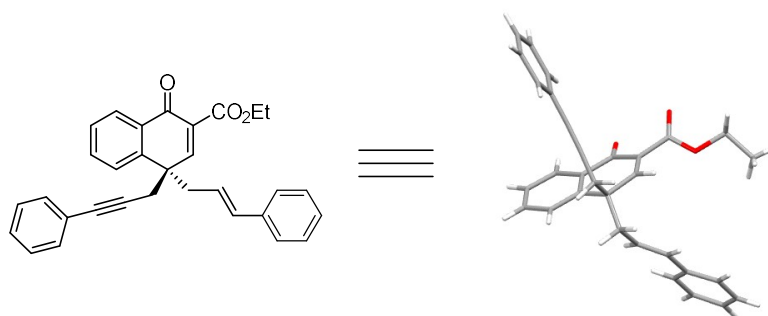

**Table S7.** Crystallographic Data for C<sub>31</sub>H<sub>26</sub>O<sub>3</sub> (**B1**).

|                                                   |                                                              |
|---------------------------------------------------|--------------------------------------------------------------|
| Formula                                           | C <sub>31</sub> H <sub>26</sub> O <sub>3</sub> ( <b>B1</b> ) |
| Formula mass (amu)                                | 446.52                                                       |
| Space group                                       | P 21 21 21                                                   |
| <i>a</i> (Å)                                      | 7.8307(1)                                                    |
| <i>b</i> (Å)                                      | 15.5594(3)                                                   |
| <i>c</i> (Å)                                      | 21.1844(4)                                                   |
| <i>α</i> (deg)                                    | 90                                                           |
| <i>β</i> (deg)                                    | 90                                                           |
| <i>γ</i> (deg)                                    | 90                                                           |
| <i>V</i> (Å <sup>3</sup> )                        | 2581.13(8)                                                   |
| <i>Z</i>                                          | 4                                                            |
| <i>λ</i> (Å)                                      | 1.54178                                                      |
| <i>T</i> (K)                                      | 173 K                                                        |
| $\rho_{\text{calcd}}$ (g cm <sup>-3</sup> )       | 1.149                                                        |
| $\mu$ (mm <sup>-1</sup> )                         | 0.576                                                        |
| Transmission factors                              | 0.635, 1.000                                                 |
| $2\theta_{\text{max}}$ (deg)                      | 68.274                                                       |
| No. of unique data, including $F_o^2 < 0$         | 3056                                                         |
| No. of unique data, with $F_o^2 > 2\sigma(F_o^2)$ | 2770                                                         |
| No. of variables                                  | 237                                                          |
| $R(F)$ for $F_o^2 > 2\sigma(F_o^2)$ <sup>a</sup>  | 0.0467                                                       |
| $R_w(F_o^2)$ <sup>b</sup>                         | 0.1760                                                       |
| Goodness of fit                                   | 1.180                                                        |

<sup>a</sup>  $R(F) = \sum ||F_o| - |F_c|| / \sum |F_o|$ .

<sup>b</sup>  $R_w(F_o^2) = [\sum [w(F_o^2 - F_c^2)^2] / \sum wF_o^4]^{1/2}$ ;  $w^{-1} = [\sigma^2(F_o^2) + (Ap)^2 + Bp]$ , where  $p = [\max(F_o^2, 0) + 2F_c^2] / 3$ .

The structure of product **B35** was determined by X-ray chromatography analysis. A single crystal of **B35** was obtained by recrystallization in dichloromethane and petroleum ether at room temperature. The crystal data and further details are listed in **Table S8**. CCDC 2235350 (**B35**) contains the supplementary crystallographic data for this paper. These data are provided free of charge by The Cambridge Crystallographic Data Centre.

The colourless crystal in block-shape, with approximate dimensions of 0.136 × 0.139 × 0.256 mm<sup>3</sup>, was selected and mounted for the single-crystal X-ray diffraction. The data set was collected by Bruker D8 Venture Photon II diffractometer at 173(2)K equipped with micro-focus Cu radiation source ( $K_\alpha = 1.54178\text{\AA}$ ). Applied with face-indexed numerical absorption correction, the structure solution was solved and refinement was processed by SHELXTL (version 6.14) and OLEX 2.3 program package<sup>a, b, c</sup>.<sup>d</sup> The structure was analyzed by ADDSYM routine implemented in PLATON suite and no higher symmetry was suggested<sup>c</sup>.

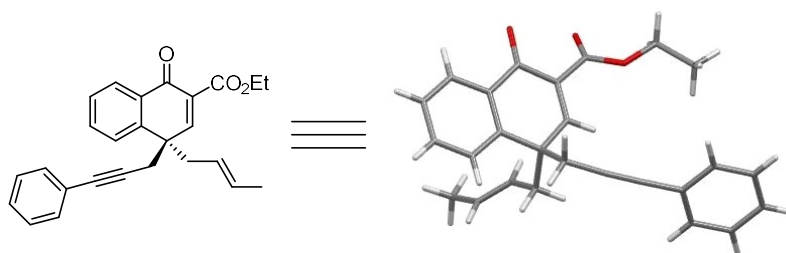

**Table S8.** Crystallographic Data for  $C_{26}H_{24}O_3$  (**B35**).

|                                                   |                                  |
|---------------------------------------------------|----------------------------------|
| Formula                                           | $C_{26}H_{24}O_3$ ( <b>B35</b> ) |
| Formula mass (amu)                                | 384.45                           |
| Space group                                       | P 21 21 21                       |
| $a$ (Å)                                           | 7.9089(2)                        |
| $b$ (Å)                                           | 15.0721(3)                       |
| $c$ (Å)                                           | 17.4446(4)                       |
| $\alpha$ (deg)                                    | 90                               |
| $\beta$ (deg)                                     | 90                               |
| $\gamma$ (deg)                                    | 90                               |
| $V$ (Å <sup>3</sup> )                             | 2079.46(8)                       |
| $Z$                                               | 4                                |
| $\lambda$ (Å)                                     | 1.54178                          |
| $T$ (K)                                           | 173 K                            |
| $\rho_{\text{calcd}}$ (g cm <sup>-3</sup> )       | 1.228                            |
| $\mu$ (mm <sup>-1</sup> )                         | 0.628                            |
| Transmission factors                              | 0.820, 1.000                     |
| $2\theta_{\text{max}}$ (deg)                      | 79.379                           |
| No. of unique data, including $F_o^2 < 0$         | 4362                             |
| No. of unique data, with $F_o^2 > 2\sigma(F_o^2)$ | 4170                             |
| No. of variables                                  | 264                              |
| $R(F)$ for $F_o^2 > 2\sigma(F_o^2)$ <sup>a</sup>  | 0.0321                           |
| $R_w(F_o^2)$ <sup>b</sup>                         | 0.0775                           |
| Goodness of fit                                   | 1.060                            |

<sup>a</sup>  $R(F) = \sum ||F_o| - |F_c|| / \sum |F_o|$ .

<sup>b</sup>  $R_w(F_o^2) = [\sum [w(F_o^2 - F_c^2)^2] / \sum wF_o^4]^{1/2}$ ;  $w^{-1} = [\sigma^2(F_o^2) + (Ap)^2 + Bp]$ , where  $p = [\max(F_o^2, 0) + 2F_c^2] / 3$ .

References:

<sup>a</sup> Sheldrick, G. M. *Acta Cryst.* **2008**, *A64*, 112–122.

<sup>b</sup> Sheldrick, G. M. *Acta Cryst.* **2015**, *A71*, 3–8.

<sup>c</sup> Sheldrick, G. M. *Acta Cryst.* **2015**, *C71*, 3–8.

<sup>d</sup> Dolomanov, O.V., Bourhis, L.J., Gildea, R.J., Howard, J. A. K., Puschmann, H. *J. Appl. Cryst.* **2009**, *42*, 339–341.

<sup>e</sup> Spek, A. L. *J. Appl. Cryst.* **2003**, *36*, 7–13

## 13. DFT Calculation of Reaction Mechanism

### 13.1 Computational Methods

All calculations were performed using Gaussian 09 program package,<sup>[1]</sup> employing the B3LYP-D3 density functional with the 6-31G(d,p) basis set. Geometries were optimized in 1,1,2,2-TCE solvent and characterized by frequency analysis at 298 K. The self-consistent reaction field (SCRF) method based on the universal solvation model SMD<sup>[2]</sup> was adopted to evaluate the effect of solvent. Grimme's DFT-D3 approach for the treatment of London-dispersion interactions were used in structural optimization.<sup>[3-4]</sup> The intrinsic reaction coordinate (IRC) path was traced to check the energy profiles connecting each transition state to two associated minima of the proposed mechanism.<sup>[5]</sup>

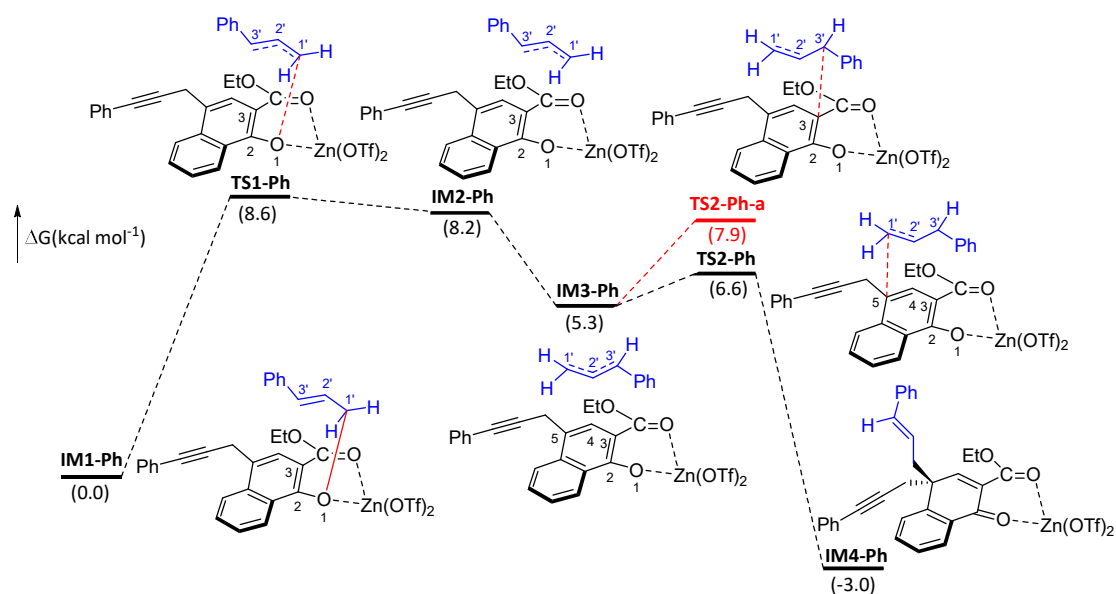

Figure S3. Energy profile for the rearrangement reaction of B1 catalyzed by Zn(OTf)<sub>2</sub>.

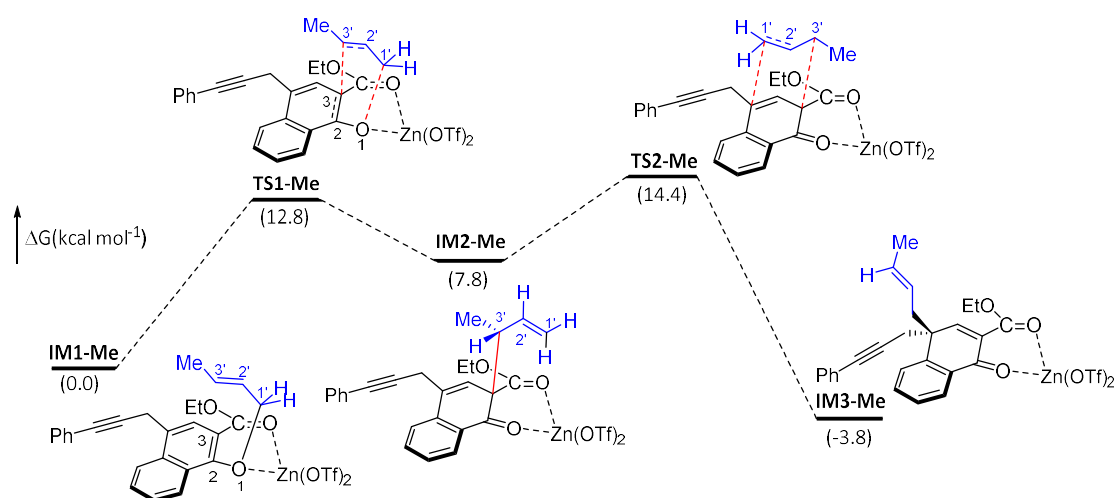

Figure S4. Energy profile for the rearrangement reaction of B34 catalyzed by Zn(OTf)<sub>2</sub>.

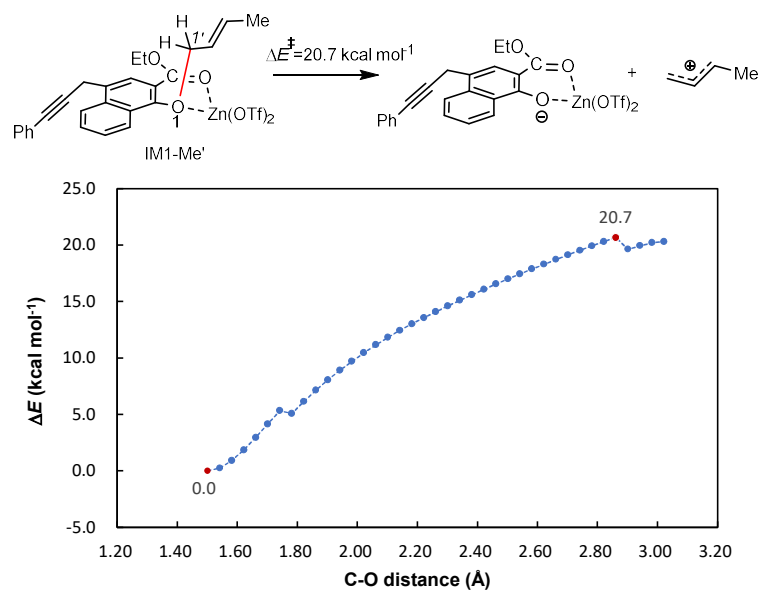

**Figure S5.** Evaluation of energy barrier associated with the formation of ion-pair by C<sub>1</sub>-O bond relaxed scan.

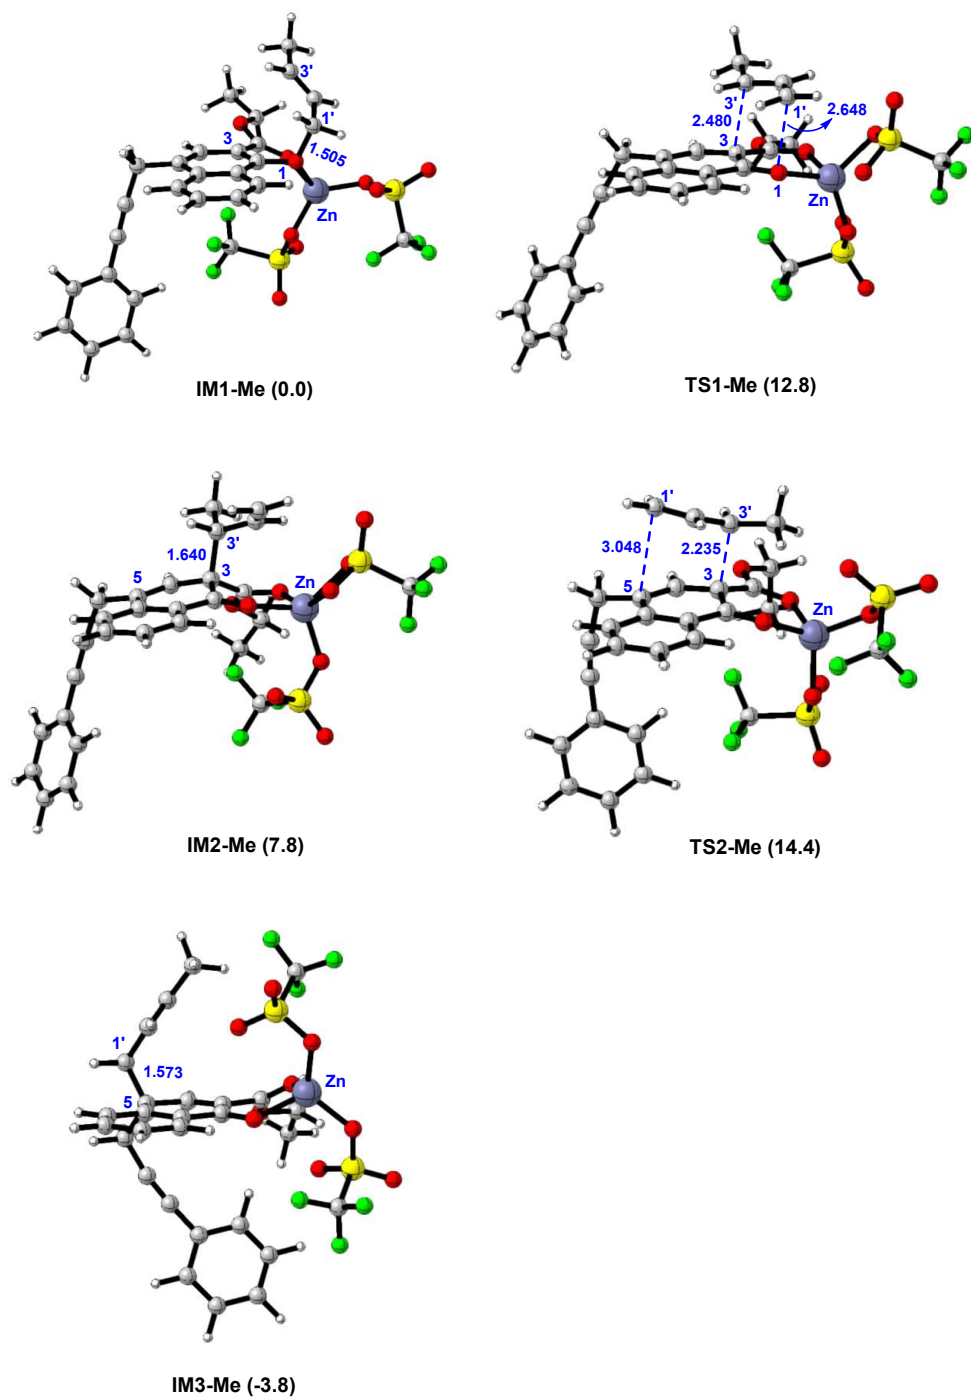

**Figure S6.** Optimized geometries of intermediates and transition states. Relative Gibbs free energy in parenthesis was in kcal mol<sup>-1</sup>.

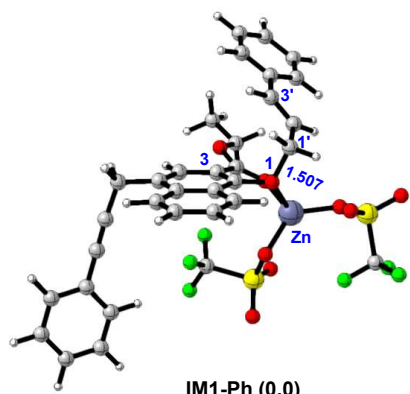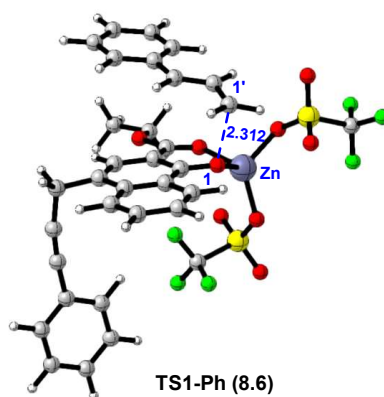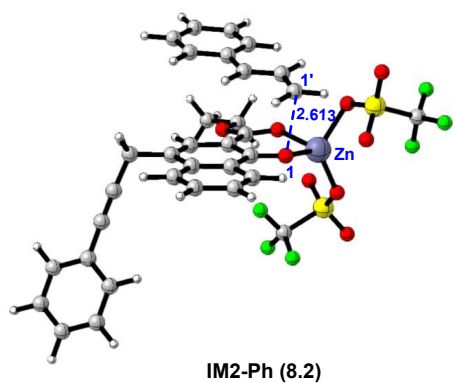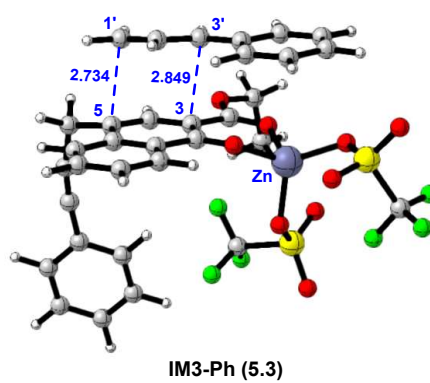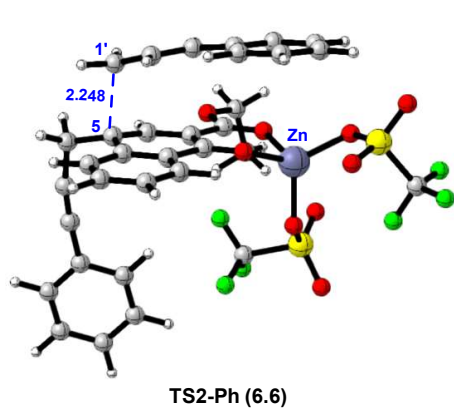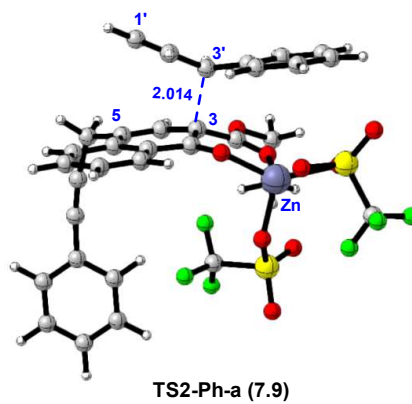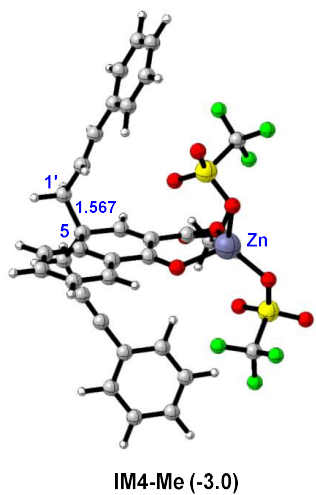



**Figure S7.** Optimized geometries of intermediates and transition states. Relative Gibbs free energy in parenthesis was in kcal mol<sup>-1</sup>.

**Table S9.** The correct electronic energies ( $E_z$ ), enthalpies ( $H$ ), and Gibbs free energies ( $G$ ) for all stationary points (in Hartree), obtained at the B3LYP-D3/6-31G(d,p) (SMD, CCl<sub>4</sub>) level of theory.

| Structures | <sup>a</sup> ZPE | <sup>b</sup> H <sub>c</sub> | <sup>c</sup> G <sub>c</sub> | $E_z$       | $H$         | $G$         |
|------------|------------------|-----------------------------|-----------------------------|-------------|-------------|-------------|
| IM1-Me     | 0.49251          | 0.53566                     | 0.41168                     | -4932.60362 | -4932.56046 | -4932.68444 |
| TS1-Me     | 0.48937          | 0.53259                     | 0.40680                     | -4932.58151 | -4932.53829 | -4932.66408 |
| IM2-Me     | 0.49222          | 0.53512                     | 0.41248                     | -4932.59220 | -4932.54929 | -4932.67193 |
| TS2-Me     | 0.49032          | 0.53300                     | 0.41120                     | -4932.58236 | -4932.54057 | -4932.66148 |
| IM3-Me     | 0.49256          | 0.53544                     | 0.41393                     | -4932.61181 | -4932.56893 | -4932.69044 |
| IM1-Ph     | 0.54639          | 0.59199                     | 0.46240                     | -5124.31128 | -5124.26568 | -5124.39527 |
| TS1-Ph     | 0.54416          | 0.58959                     | 0.46076                     | -5124.29843 | -5124.25299 | -5124.38182 |
| IM2-Ph     | 0.54382          | 0.59016                     | 0.45936                     | -5124.29773 | -5124.25139 | -5124.38219 |
| IM3-Ph     | 0.54378          | 0.58986                     | 0.46133                     | -5124.30443 | -5124.25834 | -5124.38688 |
| TS2-Ph     | 0.54411          | 0.58935                     | 0.46291                     | -5124.30349 | -5124.25826 | -5124.38469 |
| IM4-Ph     | 0.54608          | 0.59161                     | 0.46330                     | -5124.31734 | -5124.27181 | -5124.40012 |
| TS1-Me-a   | 0.54355          | 0.59344                     | 0.45423                     | -5124.29333 | -5124.24345 | -5124.38266 |

<sup>a</sup> Zero-point correction energy;

<sup>b</sup> Thermal correction to enthalpy;

<sup>c</sup> Thermal correction to Gibbs free energy.

## References:

- [1] Frisch, M. J.; Trucks, G. W.; Schlegel, H. B.; Scuseria, G. E.; Robb, M. A.; Cheeseman, J. R.; Scalmani, G.; Barone, V.; Mennucci, B.; Petersson, G. A.; Nakatsuji, H.; Caricato, M.; Li, X.; Hratchian, H. P.; Izmaylov, A. F.; Bloino, J.; Zheng, G.; Sonnenberg, J. L.; Hada, M.; Ehara, M.; Toyota, K.; Fukuda, R.; Hasegawa, J.; Ishida, M.; Nakajima, T.; Honda, Y.; Kitao, O.; Nakai, H.; Vreven, T.; Montgomery, J. A.; Peralta, J. J. E.; Ogliaro, F.; Bearpark, M.; Heyd, J. J.; Brothers, E.; Kudin, K. N.; taroverov, V. N.; Keith, T.; Kobayashi, R.; Normand, J.; Raghavachari, K.; Rendell, A.; Burant, J. C.; Iyengar, S. S.; Tomasi, J.; Cossi, M.; Rega, N.; Millam, J. M.; Klene, M.; Knox, J. E.; Cross, J. B.; Bakken, V.; Adamo, C.; Jaramillo, J.; Gomperts, R.; Stratmann, R. E.; Yazyev, O.; Austin, A. J.; Cammi, R.; Pomelli, C.; Ochterski, J. W.; Martin, R. L.; Morokuma, K.; Zakrzewski, V. G.; Voth, G. A.; Salvador, P.; Dannenberg, J. J.; Dapprich, S.; Daniels, A. D.; Farkas, O.; Foresman, J. B.; Ortiz, J. V.; Cioslowski, J.; Fox, D. J. Gaussian 09 (Revision D.01) I. Gaussian, Wallingford, CT, 2013.
- [2] Marenich, A. V.; Cramer, C. J.; Truhlar, D. Universal Solvation Model Based on Solute Electron Density and on a Continuum Model of the Solvent Defined by the Bulk Dielectric Constant and Atomic Surface Tensions. *J. Phys. Chem. B* 2009, 113, 6378–6396.
- [3] Grimme, S.; Antony, J.; Ehrlich, S.; Krieg, H. A Consistent and Accurate ab Initio Parametrization of Density Functional Dispersion Correction (DFT-D) for the 94 Elements H-Pu. *J. Chem. Phys.* 2010, 132, 154104–154119.
- [4] Grimme, S.; Ehrlich, S.; Goerigk, L. Effect of the Damping Function in Dispersion Corrected Density Functional Theory. *J. Comput. Chem.* 2011, 32, 1456–1465.

[5] Gonzalez, C.; Schlegel, H. B. An Improved Algorithm for Reaction Path Following. J. Chem. Phys. 1989, 90, 2154–2161.

### 13.2 Cartesian coordinates of all stationary points in this work

#### IM1-Me

|   |             |             |             |
|---|-------------|-------------|-------------|
| C | 2.50145000  | 1.97114000  | 1.81214100  |
| C | 2.97649200  | 2.89782500  | 0.74939100  |
| C | 2.49575700  | 4.13662400  | 0.59016100  |
| C | 2.87935300  | 5.07438000  | -0.51096200 |
| H | 3.63300200  | 4.64006800  | -1.17439000 |
| H | 1.99652100  | 5.33594100  | -1.10838700 |
| H | 3.28259300  | 1.32260200  | 2.20703700  |
| H | 3.70680500  | 2.49665200  | 0.04870600  |
| H | 1.75735000  | 4.50610500  | 1.30301200  |
| H | 1.98317600  | 2.48133100  | 2.62638300  |
| H | 3.27443200  | 6.01526100  | -0.10885300 |
| C | -2.45213200 | 0.85862500  | 4.30776600  |
| C | -1.10885200 | 0.43445000  | 4.42775600  |
| C | -0.22813400 | 0.62787900  | 3.38902000  |
| C | -0.66125300 | 1.26313500  | 2.19501000  |
| C | -2.89962200 | 1.46751200  | 3.15504900  |
| C | -2.02229600 | 1.69593400  | 2.06309300  |
| H | -3.14263400 | 0.68922300  | 5.12825500  |
| H | -0.77775600 | -0.06073400 | 5.33497400  |
| H | 0.79427500  | 0.27423000  | 3.45400600  |
| H | -3.94127300 | 1.75395000  | 3.07409000  |
| C | -2.44580700 | 2.31822700  | 0.84242600  |
| C | 0.21817800  | 1.43410400  | 1.09637400  |
| C | -0.20792200 | 2.02003500  | -0.08648700 |
| C | -1.55215500 | 2.47216400  | -0.18789600 |
| O | 1.52328200  | 0.98092800  | 1.24091900  |
| C | -3.89453400 | 2.74120000  | 0.63797200  |
| H | -3.94922600 | 3.42520100  | -0.21721100 |
| C | -4.75942300 | 1.58251200  | 0.40210300  |
| C | -5.40891800 | 0.57714100  | 0.20813400  |
| H | -4.25465000 | 3.31113900  | 1.50383900  |
| C | -6.17068400 | -0.61001900 | -0.02405400 |
| C | -5.55248400 | -1.75246700 | -0.56859700 |
| C | -7.54260800 | -0.65624800 | 0.29040900  |
| C | -6.29352000 | -2.91043100 | -0.79003900 |
| H | -4.49744200 | -1.72100300 | -0.81310000 |
| C | -8.27489100 | -1.81915700 | 0.06435200  |
| H | -8.02166300 | 0.22265000  | 0.71027800  |
| C | -7.65417200 | -2.94871600 | -0.47512800 |

|    |             |             |             |
|----|-------------|-------------|-------------|
| H  | -5.80553000 | -3.78557900 | -1.20880100 |
| H  | -9.33250300 | -1.84429200 | 0.31041800  |
| H  | -8.22790500 | -3.85428900 | -0.64899900 |
| C  | 0.65922600  | 2.06256500  | -1.27859300 |
| O  | 1.56383500  | 1.24144900  | -1.53079200 |
| O  | 0.37602700  | 3.03048500  | -2.12128200 |
| C  | 1.11761800  | 3.06506200  | -3.38820100 |
| C  | 0.56459500  | 4.22050800  | -4.18925400 |
| H  | 2.17803200  | 3.18355800  | -3.15188700 |
| H  | 0.97777900  | 2.10181300  | -3.88557600 |
| H  | 0.70246400  | 5.16928100  | -3.66277000 |
| H  | 1.09287700  | 4.27758800  | -5.14569800 |
| H  | -0.50107200 | 4.08207400  | -4.39257000 |
| H  | -1.87510700 | 2.91015800  | -1.12504900 |
| Zn | 2.02139300  | -0.26791000 | -0.32030000 |
| O  | 3.88566400  | -0.60344300 | -0.54298200 |
| S  | 4.63519500  | -1.20483900 | 0.66756700  |
| C  | 4.42736100  | -3.02572600 | 0.32677700  |
| O  | 6.06595800  | -0.92225400 | 0.62233900  |
| F  | 3.12084100  | -3.31509400 | 0.25470600  |
| F  | 5.01096700  | -3.34859100 | -0.82801500 |
| F  | 4.97824200  | -3.73435900 | 1.31478600  |
| O  | 3.88064700  | -0.95674600 | 1.91026500  |
| O  | 0.58365000  | -1.48644100 | 0.05580500  |
| S  | -0.02191400 | -2.21560200 | -1.15659400 |
| C  | -1.54694000 | -1.17091300 | -1.45814200 |
| O  | -0.52238300 | -3.54474600 | -0.82489100 |
| F  | -2.15456200 | -0.86978200 | -0.30583700 |
| F  | -2.40396400 | -1.83412200 | -2.24114900 |
| O  | 0.82158300  | -2.01511100 | -2.34675400 |
| F  | -1.20875300 | -0.02311600 | -2.07546400 |

**TS1-Me**

|   |             |             |             |
|---|-------------|-------------|-------------|
| C | -3.30268100 | -3.28088100 | -2.42303900 |
| C | -2.04045300 | -3.02459600 | -2.98367700 |
| C | -1.08390600 | -2.35299400 | -2.24182800 |
| C | -1.36405000 | -1.93343500 | -0.92537900 |
| C | -3.59962400 | -2.86942000 | -1.13309500 |
| C | -2.64131300 | -2.18823300 | -0.34979800 |
| H | -4.05745100 | -3.80071500 | -3.00550500 |
| H | -1.81788600 | -3.34593600 | -3.99619200 |
| H | -0.10681200 | -2.13211900 | -2.65593500 |
| H | -4.58777800 | -3.06001600 | -0.73210200 |
| C | -2.91469800 | -1.73792300 | 1.00170500  |

|    |              |             |             |
|----|--------------|-------------|-------------|
| C  | -0.32684500  | -1.23798300 | -0.17136800 |
| C  | -0.60148300  | -0.92445400 | 1.20620100  |
| C  | -1.93315100  | -1.11738200 | 1.71381800  |
| O  | 0.79585000   | -1.03597100 | -0.74847800 |
| C  | -4.28886200  | -1.93464600 | 1.62638800  |
| H  | -4.23778400  | -1.66554800 | 2.68733900  |
| C  | -5.33202500  | -1.14369300 | 0.96902400  |
| C  | -6.16395200  | -0.48549600 | 0.38220000  |
| H  | -4.56185500  | -2.99904600 | 1.59556000  |
| C  | -7.13200200  | 0.28574300  | -0.33244700 |
| C  | -6.91700000  | 0.60578700  | -1.68734200 |
| C  | -8.30801800  | 0.73318300  | 0.29932800  |
| C  | -7.85814400  | 1.35545100  | -2.38830300 |
| H  | -6.01026400  | 0.26247700  | -2.17537300 |
| C  | -9.24363900  | 1.48187700  | -0.41059500 |
| H  | -8.47630100  | 0.48905200  | 1.34342300  |
| C  | -9.02288500  | 1.79524100  | -1.75405600 |
| H  | -7.68171000  | 1.59814100  | -3.43207000 |
| H  | -10.14722400 | 1.82260700  | 0.08637000  |
| H  | -9.75436800  | 2.38009000  | -2.30379200 |
| C  | 0.34171800   | -0.10236700 | 1.98487400  |
| O  | 1.51074000   | 0.15670500  | 1.65898300  |
| O  | -0.14186800  | 0.33283100  | 3.13574300  |
| C  | 0.71505100   | 1.23508700  | 3.91621700  |
| C  | -0.11550000  | 1.72177500  | 5.08124200  |
| H  | 1.59685400   | 0.67223500  | 4.23513200  |
| H  | 1.04019300   | 2.04076900  | 3.25456700  |
| H  | -0.44173800  | 0.88958900  | 5.71264000  |
| H  | 0.48624300   | 2.40218600  | 5.69139000  |
| H  | -0.99771700  | 2.26488700  | 4.73062800  |
| H  | -2.14370000  | -0.76299200 | 2.71538300  |
| Zn | 2.25803100   | 0.16327700  | -0.20520900 |
| O  | 4.07472400   | -0.49857800 | 0.50589200  |
| S  | 4.61850700   | -1.05656800 | -0.79953700 |
| C  | 6.00099900   | 0.11292000  | -1.23132300 |
| O  | 5.20972400   | -2.39325000 | -0.72003600 |
| F  | 5.52856000   | 1.35824300  | -1.29582800 |
| F  | 6.95210200   | 0.04757800  | -0.29611700 |
| F  | 6.52009100   | -0.22695300 | -2.41357800 |
| O  | 3.55913100   | -0.82341900 | -1.82903000 |
| O  | 2.21200800   | 1.94768500  | -0.94568900 |
| S  | 1.68082900   | 3.19709600  | -0.23120700 |
| C  | -0.15002500  | 2.99949400  | -0.51829600 |
| O  | 2.05650500   | 4.42450100  | -0.92844600 |

|   |             |             |             |
|---|-------------|-------------|-------------|
| F | -0.42903400 | 2.92703400  | -1.82165400 |
| F | -0.81921300 | 4.02354000  | 0.01807200  |
| O | 1.83068200  | 3.12435300  | 1.22845500  |
| F | -0.58451400 | 1.85946500  | 0.06800600  |
| C | 1.90392000  | -3.33815100 | -0.05190500 |
| C | 1.74037600  | -3.00107300 | 1.25951600  |
| C | 0.47616000  | -3.05301300 | 1.88381000  |
| C | 0.31958100  | -2.93426300 | 3.35868300  |
| H | 1.06423800  | -2.27017100 | 3.80493900  |
| H | -0.68564300 | -2.61712200 | 3.64285000  |
| H | 2.87923200  | -3.31631200 | -0.52562100 |
| H | 2.59009600  | -2.62816300 | 1.82524500  |
| H | -0.34292400 | -3.51498100 | 1.33873600  |
| H | 1.07283700  | -3.69788500 | -0.64995400 |
| H | 0.47395300  | -3.93614800 | 3.78794800  |

**IM2-Me**

|   |             |             |             |
|---|-------------|-------------|-------------|
| O | 4.18764700  | -0.36079900 | 0.83189300  |
| S | 4.83717100  | -0.55057700 | -0.52716000 |
| C | 6.01328400  | 0.88723000  | -0.66566900 |
| O | 5.63178200  | -1.76003900 | -0.71908100 |
| F | 5.33836200  | 2.02672900  | -0.49948100 |
| F | 6.95564700  | 0.78954200  | 0.27425200  |
| F | 6.58538600  | 0.88163800  | -1.87054600 |
| O | 3.74996100  | -0.24895100 | -1.52556200 |
| C | 2.55683200  | -3.43422800 | -0.40508200 |
| C | 2.04210800  | -2.99061600 | 0.74348700  |
| C | 0.59948400  | -3.15565900 | 1.13589300  |
| C | 0.49595300  | -3.70411000 | 2.56744300  |
| H | 0.90827700  | -3.00149700 | 3.30009900  |
| H | -0.53301100 | -3.93740800 | 2.84917100  |
| H | 3.61325600  | -3.32806000 | -0.62989600 |
| H | 2.69101100  | -2.50054900 | 1.46554700  |
| H | 0.11625000  | -3.85458100 | 0.44601100  |
| H | 1.94008000  | -3.91660300 | -1.16055700 |
| H | 1.07969300  | -4.62620300 | 2.63595600  |
| C | -3.05927300 | -2.38311900 | -3.35924700 |
| C | -1.81806400 | -1.88177800 | -3.76860100 |
| C | -0.86838700 | -1.55206600 | -2.81350400 |
| C | -1.14548400 | -1.73714700 | -1.44617700 |
| C | -3.35156700 | -2.55352900 | -2.00782000 |
| C | -2.40458800 | -2.23668300 | -1.02229300 |
| H | -3.81113300 | -2.63654000 | -4.10055100 |
| H | -1.60084300 | -1.74618400 | -4.82282300 |

|    |             |             |             |
|----|-------------|-------------|-------------|
| H  | 0.09674900  | -1.14941100 | -3.09836100 |
| H  | -4.33206000 | -2.91556200 | -1.72480800 |
| C  | -2.68347900 | -2.37378400 | 0.41340600  |
| C  | -0.12606200 | -1.36136900 | -0.47691800 |
| C  | -0.30036200 | -1.79316700 | 0.97898300  |
| C  | -1.72294300 | -2.13709400 | 1.32070500  |
| O  | 0.90643000  | -0.79072600 | -0.86883000 |
| C  | -4.08330600 | -2.75686400 | 0.87645900  |
| H  | -4.06694600 | -2.93226000 | 1.95769400  |
| C  | -5.07005900 | -1.72378200 | 0.55374500  |
| C  | -5.83158500 | -0.83373800 | 0.24147900  |
| H  | -4.37870900 | -3.71153500 | 0.41875700  |
| C  | -6.70278600 | 0.22640400  | -0.15781200 |
| C  | -6.37162000 | 1.02072400  | -1.27335100 |
| C  | -7.89077700 | 0.49576600  | 0.54793700  |
| C  | -7.21149100 | 2.05841300  | -1.66888600 |
| H  | -5.45477400 | 0.81486800  | -1.81693100 |
| C  | -8.72437500 | 1.53617500  | 0.14413700  |
| H  | -8.14843800 | -0.11368300 | 1.40836100  |
| C  | -8.38877400 | 2.31958500  | -0.96296200 |
| H  | -6.94570700 | 2.66568000  | -2.52911200 |
| H  | -9.63836500 | 1.73689000  | 0.69545800  |
| H  | -9.04075200 | 3.13049300  | -1.27389700 |
| C  | 0.27802300  | -0.74371500 | 1.92525500  |
| O  | 1.41835200  | -0.28753600 | 1.81327300  |
| O  | -0.52978100 | -0.38936400 | 2.89565500  |
| C  | -0.10328000 | 0.68759900  | 3.80405500  |
| C  | -1.36010300 | 1.37521000  | 4.28430700  |
| H  | 0.46325500  | 0.21482500  | 4.61073200  |
| H  | 0.55376900  | 1.36204400  | 3.25546800  |
| H  | -2.02721100 | 0.67803300  | 4.79872800  |
| H  | -1.08653700 | 2.17299700  | 4.98148700  |
| H  | -1.89245800 | 1.82315200  | 3.44167800  |
| H  | -1.95246400 | -2.22636100 | 2.37431400  |
| Zn | 2.34296700  | 0.22315600  | 0.04631600  |
| O  | 1.99523400  | 2.12329600  | 0.18466400  |
| S  | 0.94139800  | 2.85922400  | -0.65508200 |
| C  | -0.56554400 | 2.65358600  | 0.42982900  |
| O  | 0.60492800  | 2.13594000  | -1.88590000 |
| F  | -0.91394400 | 1.34698800  | 0.51249700  |
| F  | -1.59906300 | 3.32613700  | -0.07555400 |
| O  | 1.18084800  | 4.29929700  | -0.69514300 |
| F  | -0.33004300 | 3.08963300  | 1.67697600  |

**TS2-Me**

|    |             |             |             |
|----|-------------|-------------|-------------|
| C  | 2.01486500  | 3.45311600  | -3.23247500 |
| C  | 0.75252000  | 2.90960200  | -3.51486900 |
| C  | 0.04344900  | 2.27202100  | -2.51100000 |
| C  | 0.57314300  | 2.18885700  | -1.20840100 |
| C  | 2.55334400  | 3.37269300  | -1.95506600 |
| C  | 1.84332100  | 2.75251800  | -0.90969200 |
| H  | 2.58286900  | 3.93684900  | -4.02137400 |
| H  | 0.33930300  | 2.97755300  | -4.51578000 |
| H  | -0.92453400 | 1.82448100  | -2.70556300 |
| H  | 3.53984900  | 3.78152100  | -1.77217700 |
| C  | 2.37188100  | 2.64389900  | 0.44584000  |
| C  | -0.17841600 | 1.46182900  | -0.19323600 |
| C  | 0.31132700  | 1.51663100  | 1.18503900  |
| C  | 1.64409700  | 2.01649000  | 1.40850900  |
| O  | -1.24258900 | 0.86989100  | -0.53912900 |
| C  | 3.81095200  | 3.04380400  | 0.75032700  |
| H  | 3.92391100  | 3.19951600  | 1.82958700  |
| C  | 4.68318700  | 1.95548200  | 0.30066600  |
| C  | 5.21663700  | 0.93717600  | -0.08600900 |
| H  | 4.07594400  | 3.99482500  | 0.27536700  |
| C  | 5.69467800  | -0.33753000 | -0.51963000 |
| C  | 4.81335800  | -1.43469000 | -0.44503200 |
| C  | 6.99287900  | -0.53154000 | -1.02275100 |
| C  | 5.21925700  | -2.69467300 | -0.87161400 |
| H  | 3.81620900  | -1.27735900 | -0.05265400 |
| C  | 7.39303600  | -1.79842400 | -1.44450300 |
| H  | 7.67573900  | 0.31012900  | -1.08127200 |
| C  | 6.51107000  | -2.88006100 | -1.37226400 |
| H  | 4.52341400  | -3.52569900 | -0.81270600 |
| H  | 8.39734600  | -1.94173900 | -1.83225900 |
| H  | 6.82912900  | -3.86344500 | -1.70547300 |
| C  | -0.22981400 | 0.57853400  | 2.19732200  |
| O  | -1.15137400 | -0.23554900 | 2.01998800  |
| O  | 0.33637800  | 0.70471800  | 3.38278100  |
| C  | -0.03525500 | -0.25233700 | 4.43730400  |
| C  | 0.71252500  | -1.55698900 | 4.25154100  |
| H  | 0.25143100  | 0.26735400  | 5.35257900  |
| H  | -1.11806600 | -0.38743200 | 4.41629100  |
| H  | 1.79292500  | -1.38546500 | 4.23660800  |
| H  | 0.48083700  | -2.22035900 | 5.09107300  |
| H  | 0.40971500  | -2.05921500 | 3.33025700  |
| H  | 2.06416100  | 1.89668300  | 2.39943000  |
| Zn | -2.02670000 | -0.70518700 | 0.29612000  |

|   |             |             |             |
|---|-------------|-------------|-------------|
| O | -3.92222700 | -0.84186700 | 0.53195700  |
| S | -4.94088900 | 0.02541400  | -0.22895800 |
| C | -4.69622600 | -0.61195700 | -1.96300700 |
| O | -6.31295300 | -0.30413100 | 0.14559700  |
| F | -3.39642700 | -0.46961000 | -2.30375400 |
| F | -5.01765200 | -1.90277200 | -2.04774000 |
| F | -5.43881600 | 0.08650500  | -2.82491900 |
| O | -4.53189700 | 1.43523500  | -0.29615200 |
| O | -1.26775500 | -2.24174200 | -0.61172900 |
| S | -0.40582700 | -3.27409300 | 0.12484300  |
| C | 1.27994100  | -2.49501100 | -0.05778300 |
| O | -0.32018700 | -4.54426200 | -0.58866400 |
| F | 1.62166300  | -2.36973100 | -1.34034500 |
| F | 2.20638700  | -3.22875700 | 0.57072900  |
| O | -0.65915800 | -3.26614400 | 1.57262600  |
| F | 1.28206200  | -1.25924800 | 0.50100500  |
| C | 0.64149000  | 5.00057200  | 1.30865100  |
| C | -0.47325100 | 4.31516000  | 0.97346500  |
| C | -0.98160100 | 3.24123900  | 1.77760000  |
| C | -2.38259400 | 2.76469300  | 1.60145900  |
| H | -2.64168800 | 2.56672000  | 0.55962100  |
| H | -2.61108000 | 1.87904900  | 2.19586000  |
| H | 1.03011800  | 5.79289600  | 0.67671300  |
| H | -0.98343700 | 4.52493600  | 0.03661100  |
| H | -0.55799200 | 3.15820000  | 2.77600100  |
| H | 1.16409600  | 4.81546000  | 2.24175300  |
| H | -3.05138600 | 3.56573300  | 1.94840100  |

**IM3-Me**

|   |            |             |             |
|---|------------|-------------|-------------|
| C | 0.50687500 | -4.24841100 | -3.29271900 |
| C | 0.34844800 | -2.96038800 | -3.81806000 |
| C | 0.24246100 | -1.88252500 | -2.95555800 |
| C | 0.28802200 | -2.08036400 | -1.56187000 |
| C | 0.55735000 | -4.45004700 | -1.91609000 |
| C | 0.44725500 | -3.37543600 | -1.02688600 |
| H | 0.59315700 | -5.09951900 | -3.96135000 |
| H | 0.31376400 | -2.80626500 | -4.89133600 |
| H | 0.12782400 | -0.87350200 | -3.33305100 |
| H | 0.67905400 | -5.45848900 | -1.53446800 |
| C | 0.49559900 | -3.61348800 | 0.47197500  |
| C | 0.19973800 | -0.90815300 | -0.69481000 |
| C | 0.24474400 | -1.11289700 | 0.75905100  |
| C | 0.35781100 | -2.35812800 | 1.26605200  |
| O | 0.04359800 | 0.22715600  | -1.20564400 |



|    |             |             |             |
|----|-------------|-------------|-------------|
| C  | -0.69397800 | -4.55073200 | 0.91299200  |
| H  | -0.55258300 | -4.81202700 | 1.96951200  |
| C  | -1.97734700 | -3.88244600 | 0.72395300  |
| C  | -2.94123000 | -3.16426100 | 0.56296600  |
| H  | -0.63519500 | -5.48573200 | 0.34694700  |
| C  | -4.02616200 | -2.24992400 | 0.39476300  |
| C  | -3.83125400 | -0.88999700 | 0.70827700  |
| C  | -5.27846300 | -2.67303000 | -0.08796700 |
| C  | -4.86838300 | 0.02263000  | 0.54229300  |
| H  | -2.86981900 | -0.55101200 | 1.07660900  |
| C  | -6.31029600 | -1.75111800 | -0.25105700 |
| H  | -5.42970900 | -3.71952400 | -0.33320100 |
| C  | -6.10913100 | -0.40417500 | 0.06212000  |
| H  | -4.69552900 | 1.06516700  | 0.78063900  |
| H  | -7.27380600 | -2.08474900 | -0.62515500 |
| H  | -6.91522800 | 0.31145500  | -0.07024600 |
| C  | 0.17420300  | 0.04717000  | 1.68522900  |
| O  | 0.67320400  | 1.15973300  | 1.45352800  |
| O  | -0.43988600 | -0.21673600 | 2.81178900  |
| C  | -0.62673100 | 0.88865500  | 3.76669800  |
| C  | -1.57502000 | 0.37949600  | 4.82638400  |
| H  | 0.35667500  | 1.15484000  | 4.16372900  |
| H  | -1.03400600 | 1.73277400  | 3.20814200  |
| H  | -1.16132100 | -0.48868100 | 5.34765800  |
| H  | -1.75120600 | 1.17181200  | 5.56010400  |
| H  | -2.53498000 | 0.10260500  | 4.38180000  |
| H  | 0.36668500  | -2.48538400 | 2.34507600  |
| Zn | 0.66491800  | 1.90572700  | -0.39038800 |
| O  | 2.40061700  | 2.32267600  | -1.07828200 |
| S  | 3.51264900  | 1.25703200  | -1.10557100 |
| C  | 4.52652900  | 1.79905300  | 0.36065500  |
| O  | 3.00201100  | -0.07553100 | -0.73934500 |
| F  | 4.85022100  | 3.08932200  | 0.25926200  |
| F  | 3.82337800  | 1.61619300  | 1.49096900  |
| F  | 5.64822200  | 1.07172700  | 0.43095000  |
| O  | 4.37956600  | 1.39400200  | -2.27203900 |
| O  | -0.62864000 | 3.31895300  | -0.39599700 |
| S  | -2.04217900 | 3.12193800  | 0.17755800  |
| C  | -2.99183600 | 2.75278900  | -1.38307200 |
| O  | -2.59677200 | 4.35887900  | 0.71879500  |
| F  | -2.80860400 | 3.72371900  | -2.28050000 |
| F  | -4.29820400 | 2.65738100  | -1.10602500 |
| O  | -2.14412000 | 1.88588400  | 0.97828600  |
| F  | -2.57018800 | 1.59314300  | -1.90228500 |

|   |            |             |             |
|---|------------|-------------|-------------|
| C | 1.85999200 | -4.26775800 | 0.90056200  |
| C | 3.02194100 | -3.33702300 | 0.68565700  |
| C | 3.74029200 | -2.79968700 | 1.67571000  |
| C | 4.84061900 | -1.79883600 | 1.49740400  |
| H | 5.00381000 | -1.56219900 | 0.44427700  |
| H | 4.59652300 | -0.86223300 | 2.01215400  |
| H | 1.97653500 | -5.19845000 | 0.33384700  |
| H | 3.23133900 | -3.04571400 | -0.34262400 |
| H | 3.51065400 | -3.08627100 | 2.70454800  |
| H | 1.78724800 | -4.54303000 | 1.95906400  |
| H | 5.78271600 | -2.16049900 | 1.92921500  |

**IM1-Ph**

|   |             |             |             |
|---|-------------|-------------|-------------|
| C | 2.40257000  | 0.46298100  | 2.29476800  |
| C | 3.21165600  | 1.33641000  | 1.40636100  |
| C | 3.09098100  | 2.67500600  | 1.39876500  |
| H | 2.93176200  | -0.42885200 | 2.62758300  |
| H | 3.84877800  | 0.82178700  | 0.69168800  |
| H | 2.41354300  | 3.12930200  | 2.12169000  |
| H | 1.96962100  | 0.99225200  | 3.14582700  |
| C | -2.85893600 | 0.26500600  | 4.38381500  |
| C | -1.68319800 | -0.51694800 | 4.45476500  |
| C | -0.70097000 | -0.37614200 | 3.50191200  |
| C | -0.85961300 | 0.55969200  | 2.44586700  |
| C | -3.04098400 | 1.17355700  | 3.36340100  |
| C | -2.05023000 | 1.35510700  | 2.36349400  |
| H | -3.63310000 | 0.13733300  | 5.13420100  |
| H | -1.56386800 | -1.24194100 | 5.25352000  |
| H | 0.18837800  | -0.99495200 | 3.52446900  |
| H | -3.96450300 | 1.73731600  | 3.31024800  |
| C | -2.20275800 | 2.27794600  | 1.27674300  |
| C | 0.11878800  | 0.68755600  | 1.42747900  |
| C | -0.04966400 | 1.56862600  | 0.36940700  |
| C | -1.22157900 | 2.37249200  | 0.32209600  |
| O | 1.24726300  | -0.11791900 | 1.52094700  |
| C | -3.47382200 | 3.10059700  | 1.11661000  |
| H | -3.28273400 | 3.91456700  | 0.40735500  |
| C | -4.58717100 | 2.27728900  | 0.63794000  |
| C | -5.45920100 | 1.53767900  | 0.23450500  |
| H | -3.74193600 | 3.58370500  | 2.06483200  |
| C | -6.49211100 | 0.67163700  | -0.24170900 |
| C | -6.16623300 | -0.49527300 | -0.96003200 |
| C | -7.84640900 | 0.97314800  | -0.00023200 |
| C | -7.17496900 | -1.33740400 | -1.42114500 |

|    |             |             |             |
|----|-------------|-------------|-------------|
| H  | -5.12557300 | -0.72977500 | -1.15017000 |
| C  | -8.84755700 | 0.12453700  | -0.46607600 |
| H  | -8.09996700 | 1.87225000  | 0.55253900  |
| C  | -8.51625700 | -1.03182700 | -1.17695500 |
| H  | -6.91208000 | -2.23498500 | -1.97303500 |
| H  | -9.88889800 | 0.36637800  | -0.27426600 |
| H  | -9.29948700 | -1.69161400 | -1.53841300 |
| C  | 0.88955700  | 1.59966600  | -0.76884100 |
| O  | 1.57636300  | 0.62926300  | -1.14971400 |
| O  | 0.92212300  | 2.74240100  | -1.41048600 |
| C  | 1.75777800  | 2.82615300  | -2.61654400 |
| C  | 1.62374800  | 4.23478600  | -3.14544300 |
| H  | 2.78325600  | 2.58733700  | -2.32883800 |
| H  | 1.40025100  | 2.07038700  | -3.32085400 |
| H  | 1.96623400  | 4.96121500  | -2.40459400 |
| H  | 2.24410100  | 4.33860400  | -4.04079100 |
| H  | 0.58776700  | 4.45851000  | -3.41604100 |
| H  | -1.34797600 | 3.04202200  | -0.52056500 |
| Zn | 1.52742200  | -1.13816700 | -0.25177200 |
| O  | 3.25656400  | -1.90939200 | -0.48027800 |
| S  | 3.73986000  | -2.90219500 | 0.60100400  |
| C  | 3.07697800  | -4.50205700 | -0.08916100 |
| O  | 5.19425800  | -3.01737100 | 0.62582700  |
| F  | 1.74667200  | -4.40777500 | -0.22214900 |
| F  | 3.61937300  | -4.74794900 | -1.28234000 |
| F  | 3.36318000  | -5.50584000 | 0.74290100  |
| O  | 3.00311300  | -2.68825700 | 1.85990300  |
| O  | -0.20410400 | -1.96759200 | -0.15520600 |
| S  | -0.87616800 | -2.28316700 | -1.50330600 |
| C  | -2.06150100 | -0.84001100 | -1.64497400 |
| O  | -1.71781300 | -3.47316400 | -1.45011100 |
| F  | -2.67756500 | -0.61201100 | -0.48016800 |
| F  | -2.98175000 | -1.09997000 | -2.57896100 |
| O  | 0.08258500  | -2.09996600 | -2.60590300 |
| F  | -1.39625000 | 0.27447300  | -2.00197500 |
| C  | 3.74321400  | 3.61797500  | 0.48280200  |
| C  | 3.33920600  | 4.96477400  | 0.50358700  |
| C  | 4.73120500  | 3.23078300  | -0.44375300 |
| C  | 3.89227100  | 5.89500700  | -0.37541200 |
| H  | 2.57814000  | 5.27909900  | 1.21297400  |
| C  | 5.28122400  | 4.15963000  | -1.32260400 |
| H  | 5.07712000  | 2.20264700  | -0.47445300 |
| C  | 4.86354500  | 5.49442500  | -1.29455300 |
| H  | 3.56569900  | 6.93015600  | -0.34248300 |

|   |            |            |             |
|---|------------|------------|-------------|
| H | 6.04318800 | 3.84333000 | -2.02867700 |
| H | 5.29743100 | 6.21553600 | -1.98065100 |

**TS1-Ph**

|   |             |             |             |
|---|-------------|-------------|-------------|
| C | 2.25916600  | 1.36825100  | 2.48013300  |
| C | 2.50696100  | 2.16796700  | 1.38414300  |
| C | 1.60266900  | 3.16980000  | 1.03975200  |
| H | 2.92620200  | 0.56257700  | 2.76134900  |
| H | 3.35140000  | 1.92204400  | 0.74891000  |
| H | 0.79787200  | 3.37148900  | 1.74325500  |
| H | 1.45974800  | 1.60695000  | 3.17343100  |
| C | -2.92819000 | 0.80609600  | 4.68240800  |
| C | -1.73495600 | 0.06138900  | 4.75068800  |
| C | -0.88910000 | 0.01612300  | 3.65960500  |
| C | -1.20114500 | 0.72419200  | 2.47616000  |
| C | -3.25688100 | 1.50166100  | 3.53413100  |
| C | -2.40304300 | 1.49070200  | 2.40433200  |
| H | -3.60079800 | 0.82715500  | 5.53462800  |
| H | -1.48864900 | -0.48917400 | 5.65315000  |
| H | 0.01888300  | -0.57512900 | 3.68256000  |
| H | -4.19150900 | 2.04850500  | 3.49571600  |
| C | -2.70810800 | 2.20365300  | 1.19026200  |
| C | -0.31424800 | 0.62690400  | 1.33395800  |
| C | -0.63613700 | 1.37036400  | 0.16847800  |
| C | -1.83920100 | 2.13576800  | 0.13460900  |
| O | 0.76896000  | -0.09055200 | 1.48168500  |
| C | -4.06315700 | 2.87115200  | 0.98612100  |
| H | -3.98627100 | 3.61502500  | 0.18411200  |
| C | -5.01500400 | 1.82008000  | 0.61082200  |
| C | -5.60413500 | 0.81530400  | 0.27160900  |
| H | -4.39456400 | 3.41445600  | 1.87798200  |
| C | -6.15096600 | -0.43188700 | -0.16129200 |
| C | -5.26209900 | -1.42872900 | -0.61320900 |
| C | -7.53155300 | -0.69789900 | -0.14676600 |
| C | -5.74613400 | -2.66158600 | -1.03885100 |
| H | -4.19816300 | -1.22104700 | -0.62344900 |
| C | -8.00741100 | -1.93572700 | -0.57586700 |
| H | -8.21890900 | 0.06689100  | 0.20073400  |
| C | -7.11990500 | -2.91891900 | -1.02122200 |
| H | -5.04612000 | -3.41709200 | -1.38172100 |
| H | -9.07514200 | -2.13438000 | -0.56156300 |
| H | -7.49709600 | -3.88161400 | -1.35345300 |
| C | 0.14065200  | 1.24536500  | -1.06836900 |
| O | 1.10167500  | 0.47583100  | -1.26080800 |

|    |             |             |             |
|----|-------------|-------------|-------------|
| O  | -0.26190700 | 2.03891100  | -2.04803000 |
| C  | 0.37386500  | 1.86223900  | -3.35334200 |
| C  | -0.34139100 | 2.78512100  | -4.31334800 |
| H  | 1.43350100  | 2.10698900  | -3.25145100 |
| H  | 0.28640400  | 0.80905100  | -3.63212400 |
| H  | -0.24964400 | 3.82744400  | -3.99508500 |
| H  | 0.10246500  | 2.68567000  | -5.30866400 |
| H  | -1.40273000 | 2.53027100  | -4.38359400 |
| H  | -2.08985100 | 2.64190300  | -0.78956800 |
| Zn | 1.65848400  | -0.96212300 | -0.02530500 |
| O  | 3.57361000  | -0.75223100 | -0.29042600 |
| S  | 4.48293000  | -0.96479300 | 0.92374700  |
| C  | 5.62028400  | -2.29593900 | 0.29192800  |
| O  | 5.32115300  | 0.20664300  | 1.20170200  |
| F  | 4.90894500  | -3.36885400 | -0.06135200 |
| F  | 6.29929800  | -1.84814900 | -0.76828500 |
| F  | 6.48413600  | -2.63632800 | 1.25373800  |
| O  | 3.73377000  | -1.56396900 | 2.04484700  |
| O  | 0.91804600  | -2.72327500 | -0.30405900 |
| S  | 0.08536600  | -3.06418700 | -1.54995300 |
| C  | -1.62184300 | -2.60830900 | -0.95037400 |
| O  | 0.03812800  | -4.50122100 | -1.80505700 |
| F  | -1.95078800 | -3.28434600 | 0.15070000  |
| F  | -2.53059500 | -2.85807900 | -1.90304800 |
| O  | 0.34201900  | -2.13424500 | -2.65773400 |
| F  | -1.66562900 | -1.28728100 | -0.66786400 |
| C  | 1.63075000  | 3.99570900  | -0.13580700 |
| C  | 0.61178100  | 4.96255800  | -0.30473700 |
| C  | 2.60911900  | 3.84977500  | -1.14878300 |
| C  | 0.57844900  | 5.76540700  | -1.43703900 |
| H  | -0.15145400 | 5.06456800  | 0.46139800  |
| C  | 2.57049900  | 4.65680400  | -2.27707800 |
| H  | 3.39051000  | 3.10482700  | -1.04984800 |
| C  | 1.55854800  | 5.61486600  | -2.42405500 |
| H  | -0.20602100 | 6.50555400  | -1.55688900 |
| H  | 3.32597400  | 4.54235600  | -3.04772100 |
| H  | 1.53597500  | 6.24275600  | -3.30960400 |

**IM2-Ph**

|   |            |             |             |
|---|------------|-------------|-------------|
| C | 3.51394400 | -0.01928500 | -4.09206200 |
| C | 2.27258200 | -0.64863600 | -4.29558200 |
| C | 1.30116500 | -0.58607600 | -3.31246500 |
| C | 1.54089300 | 0.10641500  | -2.10629900 |
| C | 3.77243100 | 0.66210400  | -2.91541500 |

|    |             |             |             |
|----|-------------|-------------|-------------|
| C  | 2.79712800  | 0.74715600  | -1.89280500 |
| H  | 4.27968700  | -0.07216900 | -4.86038700 |
| H  | 2.07920000  | -1.18694800 | -5.21823900 |
| H  | 0.34166500  | -1.07325900 | -3.44262300 |
| H  | 4.74363000  | 1.12018100  | -2.77045400 |
| C  | 3.02865200  | 1.45139500  | -0.65354700 |
| C  | 0.48482200  | 0.16830800  | -1.10354500 |
| C  | 0.75093000  | 0.90367000  | 0.08764100  |
| C  | 2.03502400  | 1.49456800  | 0.28572400  |
| O  | -0.64036300 | -0.39511100 | -1.39424500 |
| C  | 4.36038500  | 2.13445300  | -0.37485700 |
| H  | 4.26635200  | 2.73674900  | 0.53590300  |
| C  | 5.46703400  | 1.18592400  | -0.22443400 |
| C  | 6.35405700  | 0.36429200  | -0.13481100 |
| H  | 4.59509100  | 2.84095500  | -1.18388400 |
| C  | 7.37699800  | -0.62965400 | -0.04470200 |
| C  | 7.20793900  | -1.87242900 | -0.68649400 |
| C  | 8.56255400  | -0.38516700 | 0.67426900  |
| C  | 8.20122900  | -2.84482000 | -0.60300500 |
| H  | 6.29499600  | -2.06157500 | -1.24234600 |
| C  | 9.55048500  | -1.36409000 | 0.75142100  |
| H  | 8.69601400  | 0.57134000  | 1.16956500  |
| C  | 9.37431600  | -2.59464500 | 0.11379000  |
| H  | 8.06027700  | -3.80027400 | -1.09977700 |
| H  | 10.46041900 | -1.16560900 | 1.31021700  |
| H  | 10.14666500 | -3.35560500 | 0.17597100  |
| C  | -0.23865100 | 0.98542400  | 1.16307900  |
| O  | -1.42311800 | 0.61231500  | 1.09223800  |
| O  | 0.20682300  | 1.54356200  | 2.27817600  |
| C  | -0.70390600 | 1.54243100  | 3.42510400  |
| C  | 0.05505700  | 2.15451600  | 4.57995800  |
| H  | -1.59060000 | 2.12099700  | 3.15713400  |
| H  | -1.01162200 | 0.51010400  | 3.60911400  |
| H  | 0.36046300  | 3.17942200  | 4.34847600  |
| H  | -0.58811700 | 2.17623100  | 5.46506500  |
| H  | 0.94725100  | 1.56850100  | 4.81884800  |
| H  | 2.21066300  | 2.00951400  | 1.22228200  |
| Zn | -2.15990900 | -0.72015000 | -0.20040600 |
| O  | -3.93000500 | 0.35330200  | -0.25829200 |
| S  | -4.48033300 | -0.18530000 | -1.56831400 |
| C  | -5.92609700 | -1.23013300 | -1.03681700 |
| O  | -5.00253900 | 0.82535700  | -2.48979900 |
| F  | -5.51931400 | -2.13510800 | -0.14630100 |
| F  | -6.86333600 | -0.45426500 | -0.48476000 |

|   |             |             |             |
|---|-------------|-------------|-------------|
| F | -6.44043500 | -1.85334800 | -2.10014100 |
| O | -3.46639700 | -1.14773200 | -2.09610100 |
| O | -2.30638400 | -2.47624400 | 0.59792200  |
| S | -1.94800700 | -2.79249500 | 2.05590600  |
| C | -0.09939200 | -2.97817400 | 1.91607200  |
| O | -2.44399600 | -4.10407700 | 2.46705200  |
| F | 0.22148800  | -3.95250200 | 1.06141600  |
| F | 0.43389600  | -3.25038200 | 3.11121300  |
| O | -2.13320600 | -1.64068000 | 2.94889400  |
| F | 0.44448800  | -1.82543100 | 1.46484700  |
| C | -1.62872000 | 1.55401000  | -2.82614700 |
| C | -1.76728300 | 2.36129600  | -1.73230500 |
| C | -0.66251200 | 3.05176300  | -1.20383800 |
| H | -2.47020600 | 1.00748900  | -3.23434600 |
| H | -2.73078000 | 2.40180700  | -1.23657200 |
| H | 0.26549400  | 3.01146500  | -1.76874000 |
| H | -0.68271200 | 1.47011600  | -3.35142100 |
| C | -0.66109100 | 3.88767000  | -0.04084800 |
| C | 0.51720600  | 4.60908300  | 0.27377800  |
| C | -1.77290800 | 3.97843300  | 0.83430200  |
| C | 0.57829900  | 5.40088400  | 1.41165800  |
| H | 1.37345000  | 4.53490000  | -0.38971400 |
| C | -1.70235800 | 4.77183700  | 1.96996200  |
| H | -2.67349000 | 3.41007700  | 0.63389100  |
| C | -0.53093900 | 5.48391200  | 2.26103300  |
| H | 1.48331500  | 5.95322400  | 1.64285900  |
| H | -2.55546000 | 4.83424900  | 2.63762800  |
| H | -0.48414100 | 6.10251700  | 3.15215200  |

**IM3-Ph**

|   |             |            |             |
|---|-------------|------------|-------------|
| C | 1.82495400  | 4.73945400 | 1.10138400  |
| C | 0.53256700  | 4.55337100 | 0.69111100  |
| C | -0.36772000 | 3.80577800 | 1.47142300  |
| C | -1.71438700 | 3.45536800 | 1.16708400  |
| H | 2.53169700  | 5.30254000 | 0.50268300  |
| H | 0.22934800  | 4.91222800 | -0.28697100 |
| H | -0.01167600 | 3.51057600 | 2.45708000  |
| H | 2.14898100  | 4.43928600 | 2.09224100  |
| C | -2.48474200 | 2.80795300 | 2.16958900  |
| C | -2.30249400 | 3.67608200 | -0.10572800 |
| C | -3.79259900 | 2.43074700 | 1.92142500  |
| C | -4.36089000 | 2.67595900 | 0.66467600  |
| C | -3.61336500 | 3.29377100 | -0.34471700 |
| H | -2.03252400 | 2.61338700 | 3.13752900  |

|   |             |             |             |
|---|-------------|-------------|-------------|
| H | -4.37041200 | 1.92312300  | 2.68580700  |
| H | -5.37070400 | 2.34204900  | 0.45766500  |
| H | -4.05305600 | 3.44435200  | -1.32467400 |
| H | -1.71983100 | 4.12751800  | -0.90057900 |
| C | 2.56114300  | 3.54152100  | -3.55000100 |
| C | 1.24151000  | 3.12016800  | -3.78426900 |
| C | 0.53613600  | 2.48475900  | -2.77723000 |
| C | 1.12458400  | 2.27299400  | -1.51398400 |
| C | 3.15778400  | 3.33923600  | -2.31569400 |
| C | 2.45507500  | 2.71229100  | -1.26333300 |
| H | 3.12348200  | 4.02399600  | -4.34379400 |
| H | 0.78186500  | 3.27909800  | -4.75447900 |
| H | -0.47444900 | 2.12805100  | -2.93930500 |
| H | 4.18198500  | 3.66117600  | -2.16817100 |
| C | 3.02067700  | 2.51400000  | 0.05578000  |
| C | 0.35410700  | 1.57267000  | -0.49055400 |
| C | 0.97093300  | 1.38241600  | 0.79765900  |
| C | 2.29037600  | 1.82601700  | 1.00766200  |
| O | -0.82898100 | 1.19548200  | -0.78825500 |
| C | 4.49340300  | 2.78076700  | 0.35176400  |
| H | 4.60595300  | 3.07289200  | 1.40320900  |
| C | 5.22662600  | 1.53687100  | 0.09943000  |
| C | 5.62606700  | 0.40626200  | -0.08496000 |
| H | 4.88957000  | 3.61215200  | -0.23841800 |
| C | 5.94694500  | -0.97396400 | -0.26966300 |
| C | 4.90635500  | -1.91807700 | -0.15789100 |
| C | 7.25080000  | -1.41836900 | -0.55140900 |
| C | 5.16540600  | -3.27469800 | -0.32410300 |
| H | 3.90246000  | -1.57103600 | 0.05572700  |
| C | 7.50168100  | -2.77965900 | -0.71469000 |
| H | 8.05511500  | -0.69498000 | -0.64006100 |
| C | 6.46467300  | -3.70949600 | -0.60058300 |
| H | 4.34986700  | -3.98577400 | -0.23719100 |
| H | 8.51119200  | -3.11613600 | -0.93218300 |
| H | 6.66818200  | -4.76845000 | -0.72925200 |
| C | 0.27578900  | 0.66335900  | 1.86779300  |
| O | -0.81820900 | 0.07648100  | 1.76227700  |
| O | 0.90389500  | 0.69323600  | 3.03705600  |
| C | 0.39202700  | -0.15604400 | 4.11718300  |
| C | 0.76423900  | -1.60963500 | 3.89426600  |
| H | 0.87103300  | 0.26104200  | 5.00467800  |
| H | -0.68887600 | -0.01826400 | 4.18899500  |
| H | 1.84057000  | -1.71232400 | 3.72795800  |
| H | 0.49843200  | -2.18370400 | 4.78807700  |



|    |             |             |             |
|----|-------------|-------------|-------------|
| H  | 0.22447700  | -2.03299000 | 3.04599500  |
| H  | 2.75157100  | 1.61774600  | 1.96604100  |
| Zn | -1.71726200 | -0.32203800 | 0.02750300  |
| O  | -3.60414700 | -0.44425200 | 0.38522100  |
| S  | -4.55041400 | -0.47749800 | -0.82638900 |
| C  | -4.85411700 | -2.30943100 | -0.99162600 |
| O  | -5.85637600 | 0.11251000  | -0.52050800 |
| F  | -3.70367000 | -2.94505800 | -1.23390600 |
| F  | -5.39042000 | -2.78916600 | 0.13459400  |
| F  | -5.69735500 | -2.53266500 | -2.00605100 |
| O  | -3.85027900 | -0.07240200 | -2.05574600 |
| O  | -0.92370900 | -1.86390600 | -0.87991200 |
| S  | -0.55006200 | -3.11044200 | -0.07582500 |
| C  | 1.28932500  | -2.84535000 | 0.10929600  |
| O  | -0.67941800 | -4.34805000 | -0.84018200 |
| F  | 1.90000200  | -2.85628800 | -1.07833600 |
| F  | 1.82966500  | -3.79532200 | 0.88235500  |
| O  | -1.07318700 | -3.05082000 | 1.29861200  |
| F  | 1.53147800  | -1.64684600 | 0.69253200  |

**TS2-Ph**

|   |             |            |             |
|---|-------------|------------|-------------|
| C | 2.08277000  | 4.35950900 | 1.37119200  |
| C | 0.77669400  | 4.45776900 | 0.86682600  |
| C | -0.28803200 | 3.81970700 | 1.46918300  |
| C | -1.62664900 | 3.66251600 | 0.95404800  |
| H | 2.86623900  | 4.98037800 | 0.94948000  |
| H | 0.64608900  | 4.92670700 | -0.10301300 |
| H | -0.10452700 | 3.36628200 | 2.44197700  |
| H | 2.24080600  | 4.04806300 | 2.39910100  |
| C | -2.53544600 | 2.86338700 | 1.68333000  |
| C | -2.03976400 | 4.18970700 | -0.29129000 |
| C | -3.80479100 | 2.59427100 | 1.18660600  |
| C | -4.19577200 | 3.12411500 | -0.04574400 |
| C | -3.31235700 | 3.92627300 | -0.77749900 |
| H | -2.22351400 | 2.43562300 | 2.63195100  |
| H | -4.47996700 | 1.94522900 | 1.73115300  |
| H | -5.17426100 | 2.87974800 | -0.44304500 |
| H | -3.61665100 | 4.32681300 | -1.73929200 |
| H | -1.35907100 | 4.79552100 | -0.87950900 |
| C | 2.65615400  | 3.64847600 | -3.24274200 |
| C | 1.37018500  | 3.17508400 | -3.54432300 |
| C | 0.65338500  | 2.47839800 | -2.58565700 |
| C | 1.20395600  | 2.25276800 | -1.30946500 |
| C | 3.20930500  | 3.44055000 | -1.98655100 |

|    |             |             |             |
|----|-------------|-------------|-------------|
| C  | 2.49567200  | 2.74747000  | -0.99132400 |
| H  | 3.22805600  | 4.17955100  | -3.99764100 |
| H  | 0.94281700  | 3.34410000  | -4.52740000 |
| H  | -0.33626100 | 2.09006100  | -2.79570300 |
| H  | 4.20689000  | 3.81140900  | -1.78312000 |
| C  | 3.00181600  | 2.56936000  | 0.36891500  |
| C  | 0.42295900  | 1.48390300  | -0.33806500 |
| C  | 1.02699900  | 1.21790100  | 0.95250300  |
| C  | 2.29988800  | 1.70036600  | 1.22520900  |
| O  | -0.73253300 | 1.09061100  | -0.68043400 |
| C  | 4.48721200  | 2.76171700  | 0.68035000  |
| H  | 4.60877100  | 2.95298800  | 1.75385800  |
| C  | 5.18301600  | 1.52941200  | 0.30272000  |
| C  | 5.55445900  | 0.41657500  | -0.00592500 |
| H  | 4.90091100  | 3.63516000  | 0.16774400  |
| C  | 5.86445800  | -0.93214500 | -0.36242300 |
| C  | 4.80609400  | -1.85634600 | -0.47454700 |
| C  | 7.18185900  | -1.36221600 | -0.60142100 |
| C  | 5.06266100  | -3.18064600 | -0.81558600 |
| H  | 3.79108600  | -1.52374000 | -0.29027400 |
| C  | 7.42904200  | -2.69048500 | -0.94312800 |
| H  | 7.99927300  | -0.65303300 | -0.51812300 |
| C  | 6.37467800  | -3.60132100 | -1.05010000 |
| H  | 4.23529000  | -3.87834200 | -0.89663000 |
| H  | 8.44874700  | -3.01594000 | -1.12708500 |
| H  | 6.57459400  | -4.63492800 | -1.31651500 |
| C  | 0.32338600  | 0.42831500  | 1.97363900  |
| O  | -0.77837900 | -0.12908100 | 1.82629100  |
| O  | 0.95845400  | 0.36146700  | 3.13330100  |
| C  | 0.42685700  | -0.54157100 | 4.16179100  |
| C  | 0.75796300  | -1.98655200 | 3.84162300  |
| H  | 0.92211900  | -0.19512100 | 5.07019300  |
| H  | -0.64905500 | -0.37580000 | 4.24727600  |
| H  | 1.83111800  | -2.10862400 | 3.66774700  |
| H  | 0.47551100  | -2.61043300 | 4.69596500  |
| H  | 0.20610200  | -2.33735400 | 2.96840100  |
| H  | 2.75652900  | 1.44525500  | 2.17466800  |
| Zn | -1.70709700 | -0.41282400 | 0.08167800  |
| O  | -3.56762900 | -0.48641400 | 0.57192700  |
| S  | -4.56207600 | -0.33735200 | -0.59154300 |
| C  | -5.01867300 | -2.11900400 | -0.89448700 |
| O  | -5.80005300 | 0.33088500  | -0.18373300 |
| F  | -3.92615800 | -2.81974200 | -1.21591100 |
| F  | -5.57034300 | -2.64633600 | 0.20216700  |

|   |             |             |             |
|---|-------------|-------------|-------------|
| F | -5.89576600 | -2.19041800 | -1.90213200 |
| O | -3.86947600 | 0.10969000  | -1.81214600 |
| O | -1.00175300 | -1.93003200 | -0.92788000 |
| S | -0.63203300 | -3.22207700 | -0.19536000 |
| C | 1.21354100  | -2.98936000 | -0.02693900 |
| O | -0.79182600 | -4.41523500 | -1.02157300 |
| F | 1.80733500  | -2.96324100 | -1.22520900 |
| F | 1.75115700  | -3.97242900 | 0.70148300  |
| O | -1.12936600 | -3.22625400 | 1.18925200  |
| F | 1.48048300  | -1.81522200 | 0.59444200  |

**TS2-Ph-a**

|   |             |            |             |
|---|-------------|------------|-------------|
| C | 1.15389100  | 5.25696100 | 0.00977400  |
| C | 0.10328400  | 4.45912900 | -0.22518700 |
| C | -0.45740400 | 3.57766800 | 0.80288900  |
| C | -1.89289000 | 3.24896000 | 0.79865900  |
| H | 1.55530300  | 5.90413300 | -0.76392000 |
| H | -0.34585600 | 4.44108300 | -1.21342400 |
| H | -0.07444300 | 3.79335600 | 1.79893300  |
| H | 1.62900700  | 5.30357500 | 0.98541500  |
| C | -2.54510900 | 3.05186700 | 2.03245100  |
| C | -2.63170800 | 3.08761400 | -0.38976300 |
| C | -3.89023000 | 2.70528100 | 2.07899400  |
| C | -4.60558200 | 2.53092700 | 0.89161100  |
| C | -3.97534700 | 2.72868000 | -0.33847400 |
| H | -1.98351500 | 3.17203100 | 2.95501400  |
| H | -4.37835200 | 2.55379000 | 3.03658200  |
| H | -5.64207100 | 2.21485300 | 0.91653300  |
| H | -4.52636000 | 2.56939500 | -1.25816300 |
| H | -2.15446100 | 3.21251500 | -1.35375600 |
| C | 3.18619400  | 2.40676600 | -3.70636500 |
| C | 1.91382200  | 1.95338500 | -4.08266500 |
| C | 0.97420200  | 1.67174500 | -3.10490100 |
| C | 1.28421200  | 1.85918600 | -1.74420900 |
| C | 3.50982600  | 2.58756000 | -2.36703000 |
| C | 2.56707300  | 2.33123300 | -1.35528900 |
| H | 3.93353800  | 2.61076800 | -4.46724700 |
| H | 1.67029000  | 1.81294600 | -5.13067400 |
| H | -0.00973200 | 1.29822900 | -3.36487700 |
| H | 4.50979700  | 2.91303100 | -2.10752300 |
| C | 2.87398200  | 2.49686200 | 0.06416100  |
| C | 0.29013700  | 1.49277800 | -0.74339600 |
| C | 0.56224300  | 1.84661100 | 0.66596000  |
| C | 1.93435800  | 2.22448100 | 0.99731900  |

|    |             |             |             |
|----|-------------|-------------|-------------|
| O  | -0.79127900 | 0.96537700  | -1.11336100 |
| C  | 4.29199500  | 2.83874300  | 0.50650600  |
| H  | 4.27234700  | 3.18282300  | 1.54701600  |
| C  | 5.12481700  | 1.63939700  | 0.38942500  |
| C  | 5.64278500  | 0.54860900  | 0.27800700  |
| H  | 4.70194200  | 3.66863600  | -0.08104800 |
| C  | 6.09296200  | -0.80270400 | 0.16825000  |
| C  | 5.14298700  | -1.82965500 | 0.33526900  |
| C  | 7.42910800  | -1.13975200 | -0.10913500 |
| C  | 5.52003600  | -3.16333400 | 0.22124200  |
| H  | 4.11793100  | -1.56048600 | 0.55542300  |
| C  | 7.79964600  | -2.47918800 | -0.21816800 |
| H  | 8.16417900  | -0.35168400 | -0.23843500 |
| C  | 6.85016300  | -3.49187700 | -0.05583000 |
| H  | 4.77154800  | -3.93973400 | 0.34583600  |
| H  | 8.83340800  | -2.73418500 | -0.43263200 |
| H  | 7.14562400  | -4.53306500 | -0.14553000 |
| C  | -0.15407500 | 1.06054900  | 1.71808300  |
| O  | -1.08315000 | 0.27200600  | 1.52334200  |
| O  | 0.26698400  | 1.33102400  | 2.94023500  |
| C  | -0.29831400 | 0.54666200  | 4.04948200  |
| C  | 0.37326000  | -0.80962600 | 4.13237900  |
| H  | -0.09144800 | 1.16873300  | 4.92164200  |
| H  | -1.37671200 | 0.46604900  | 3.90150000  |
| H  | 1.45784800  | -0.69996900 | 4.22590100  |
| H  | 0.00246600  | -1.33486400 | 5.01852500  |
| H  | 0.14248000  | -1.41940200 | 3.25661900  |
| H  | 2.17822400  | 2.31345600  | 2.04885500  |
| Zn | -1.83422800 | -0.45423400 | -0.20436800 |
| O  | -3.69825700 | -0.74902300 | 0.63299400  |
| S  | -4.47340200 | -0.68242700 | -0.67070000 |
| C  | -4.86623300 | -2.46794700 | -1.03492400 |
| O  | -5.75710600 | 0.01386000  | -0.64789700 |
| F  | -3.74061800 | -3.18458800 | -1.04202900 |
| F  | -5.68957900 | -2.94569000 | -0.09868500 |
| F  | -5.45646200 | -2.56046500 | -2.22968000 |
| O  | -3.46538200 | -0.28671400 | -1.71320000 |
| O  | -0.90491300 | -2.06924300 | -0.77554500 |
| S  | -0.25765000 | -3.04937800 | 0.20527600  |
| C  | 1.48686100  | -2.38773800 | 0.23435200  |
| O  | -0.14319100 | -4.39856700 | -0.34227200 |
| F  | 2.02973200  | -2.38922000 | -0.98396900 |
| F  | 2.24978600  | -3.12678100 | 1.05185500  |
| O  | -0.74370600 | -2.86453400 | 1.57970500  |

|   |            |             |            |
|---|------------|-------------|------------|
| F | 1.49991600 | -1.11354400 | 0.69721800 |
|---|------------|-------------|------------|

**IM4-Ph**

|   |             |             |             |
|---|-------------|-------------|-------------|
| C | -0.30697600 | 4.18126100  | -3.41540800 |
| C | 0.16231500  | 2.95745000  | -3.90745300 |
| C | 0.34920300  | 1.89974400  | -3.03347000 |
| C | 0.07049500  | 2.05329600  | -1.66121600 |
| C | -0.58488200 | 4.33899000  | -2.06037800 |
| C | -0.40526300 | 3.28244400  | -1.16089300 |
| H | -0.45658200 | 5.01656300  | -4.09266800 |
| H | 0.37750600  | 2.83754000  | -4.96401100 |
| H | 0.71060900  | 0.94111800  | -3.38606500 |
| H | -0.94079500 | 5.29940400  | -1.70236000 |
| C | -0.68975000 | 3.47666600  | 0.31740400  |
| C | 0.26929700  | 0.90265500  | -0.78144200 |
| C | -0.03765100 | 1.05594500  | 0.64791700  |
| C | -0.48962100 | 2.23638700  | 1.12062700  |
| O | 0.72351800  | -0.16384600 | -1.26205800 |
| C | 0.31925100  | 4.54229600  | 0.91117000  |
| H | 0.03576200  | 4.74097900  | 1.95246000  |
| C | 1.69744300  | 4.07280100  | 0.83805900  |
| C | 2.77880300  | 3.52996600  | 0.75627700  |
| H | 0.18477400  | 5.48099300  | 0.36300500  |
| C | 4.02796300  | 2.84126300  | 0.67380600  |
| C | 4.06307800  | 1.44455000  | 0.85410300  |
| C | 5.22522200  | 3.53101000  | 0.40460200  |
| C | 5.27036400  | 0.75762300  | 0.77066900  |
| H | 3.14945600  | 0.89839400  | 1.05929900  |
| C | 6.42859900  | 2.83432600  | 0.32257500  |
| H | 5.20025000  | 4.60689800  | 0.26298800  |
| C | 6.45478300  | 1.44892900  | 0.50405200  |
| H | 5.27491000  | -0.31637100 | 0.90999200  |
| H | 7.34804900  | 3.37405500  | 0.11520900  |
| H | 7.39496500  | 0.90943200  | 0.43657100  |
| C | 0.15019900  | -0.08435200 | 1.58363500  |
| O | 0.03936400  | -1.28001600 | 1.28010300  |
| O | 0.44851900  | 0.28362800  | 2.80778400  |
| C | 0.73524800  | -0.78851300 | 3.77601200  |
| C | 1.19527000  | -0.11394700 | 5.04676800  |
| H | -0.17944500 | -1.37196100 | 3.91027200  |
| H | 1.50261500  | -1.42593400 | 3.33065600  |
| H | 0.41699700  | 0.53687900  | 5.45583700  |
| H | 1.43054800  | -0.87991200 | 5.79180100  |
| H | 2.09624100  | 0.47937400  | 4.86780400  |

|    |             |             |             |
|----|-------------|-------------|-------------|
| H  | -0.71224200 | 2.32395600  | 2.18042900  |
| Zn | 0.33174800  | -1.96212300 | -0.55894000 |
| O  | -1.25411100 | -2.59085200 | -1.45412200 |
| S  | -2.55971100 | -1.81622100 | -1.19034000 |
| C  | -3.27064400 | -2.83627700 | 0.19872300  |
| O  | -2.28242500 | -0.49543800 | -0.59647700 |
| F  | -3.56034900 | -4.06553000 | -0.23392800 |
| F  | -2.36672000 | -2.92639700 | 1.18829200  |
| F  | -4.37721400 | -2.26668000 | 0.67865800  |
| O  | -3.50180500 | -1.90812400 | -2.30293800 |
| O  | 1.78341800  | -3.19926600 | -0.43723100 |
| S  | 3.09090500  | -2.85141100 | 0.29648600  |
| C  | 4.15309900  | -2.34949500 | -1.15051000 |
| O  | 3.72019900  | -4.02924800 | 0.88578200  |
| F  | 4.18029600  | -3.31815400 | -2.06813100 |
| F  | 5.40407700  | -2.10766800 | -0.73639400 |
| O  | 2.96117800  | -1.62709500 | 1.10858300  |
| F  | 3.65756800  | -1.23544100 | -1.70597000 |
| C  | -2.15265800 | 3.97966000  | 0.56456100  |
| C  | -3.19058800 | 2.97233400  | 0.15763200  |
| C  | -4.13148800 | 2.49811700  | 0.98786800  |
| H  | -2.28000300 | 4.91703800  | 0.00948700  |
| H  | -3.14229600 | 2.62709900  | -0.87249500 |
| H  | -4.15505900 | 2.88711900  | 2.00730400  |
| H  | -2.25716500 | 4.22506600  | 1.62746500  |
| C  | -5.17175700 | 1.50463000  | 0.68434000  |
| C  | -5.17449200 | 0.73155800  | -0.49209000 |
| C  | -6.20380600 | 1.29836100  | 1.61697600  |
| C  | -6.17693400 | -0.20480500 | -0.72533900 |
| H  | -4.36730900 | 0.82793800  | -1.20766300 |
| C  | -7.21126400 | 0.36379000  | 1.38094800  |
| H  | -6.21385300 | 1.88016700  | 2.53569500  |
| C  | -7.20211600 | -0.39112000 | 0.20714800  |
| H  | -6.13728400 | -0.80969500 | -1.62570100 |
| H  | -7.99915900 | 0.22296900  | 2.11547500  |
| H  | -7.97922600 | -1.12768800 | 0.02491600  |

## 14. Spectral Characterization Data for the Substrates

### Ethyl 1-(cinnamyloxy)-4-(3-phenylprop-2-yn-1-yl)-2-naphthoate (A1)

White solid, Mp: 109–111 °C, 75% yield.

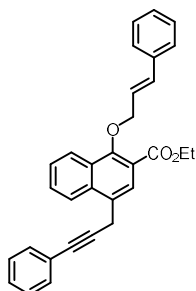

$^1\text{H NMR}$  (400 MHz, Chloroform-*d*)  $\delta$  8.40 (dd,  $J = 8.4, 1.4$  Hz, 1H), 8.13 (d,  $J = 8.4$  Hz, 2H), 7.69 (ddd,  $J = 8.4, 6.8, 1.4$  Hz, 1H), 7.61 (ddd,  $J = 8.1, 6.9, 1.3$  Hz, 1H), 7.50 – 7.44 (m, 4H), 7.36 (td,  $J = 7.1, 6.1, 1.3$  Hz, 2H), 7.30 (dq,  $J = 6.3, 3.0$  Hz, 4H), 6.82 (d,  $J = 15.8$  Hz, 1H), 6.61 (dt,  $J = 16.0, 6.1$  Hz, 1H), 4.84 (dd,  $J = 6.1, 1.4$  Hz, 2H), 4.45 (q,  $J = 7.1$  Hz, 2H), 4.19 (s, 2H), 1.44 (t,  $J = 7.2$  Hz, 3H).

$^{13}\text{C}\{^1\text{H}\}$  NMR (101 MHz, Chloroform-*d*)  $\delta$  166.2, 156.2, 136.5, 134.6, 133.1, 131.6, 129.2, 128.6, 128.5, 128.2, 127.9, 126.6, 126.5, 126.4, 124.8, 124.5, 123.8, 123.5, 119.5, 86.8, 83.7, 76.6, 61.2, 23.5, 14.4.

HRMS (ESI) Calculated for  $\text{C}_{31}\text{H}_{26}\text{O}_3$  ( $[\text{M}]+\text{Na}^+$ ) = 469.1774, Found 469.1781.

IR (neat) 2980, 1718, 1620, 1599, 1571, 1491, 1446, 1416, 1393, 1355, 1305, 1274, 1224, 1204, 1152, 1082, 1022, 961, 802, 754, 690, 639, 556, 529, 495, 432  $\text{cm}^{-1}$ .

### Methyl 1-(cinnamyloxy)-4-(3-phenylprop-2-yn-1-yl)-2-naphthoate (A2)

Colorless oil, 48% yield.

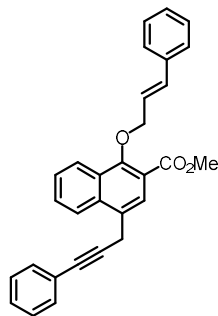

$^1\text{H NMR}$  (400 MHz, Chloroform-*d*)  $\delta$  8.44 – 8.39 (m, 1H), 8.14 (dt,  $J = 8.5, 0.9$  Hz, 1H), 8.11 (s, 1H), 7.70 (ddd,  $J = 8.4, 6.9, 1.4$  Hz, 1H), 7.64 – 7.59 (m, 1H), 7.49 – 7.44 (m, 4H), 7.38 – 7.34 (m, 2H), 7.33 – 7.27 (m, 4H), 6.83 (d,  $J = 15.8$  Hz, 1H), 6.62 (dt,  $J = 15.9, 6.1$  Hz, 1H), 4.84 (dd,  $J = 6.1, 1.4$  Hz, 2H), 4.19 (s, 2H), 3.99 (s, 3H).

$^{13}\text{C}\{^1\text{H}\}$  NMR (101 MHz, Chloroform-*d*)  $\delta$  166.6, 156.3, 136.5, 134.6, 133.3, 131.6, 129.2, 128.6, 128.6, 128.5, 128.2, 127.9, 127.9, 126.6, 126.5, 126.4, 124.7, 124.5, 123.8, 123.5, 119.1, 86.8, 83.6, 76.7, 52.3, 23.5.

HRMS (ESI) Calculated for  $\text{C}_{30}\text{H}_{24}\text{O}_3$  ( $[\text{M}]+\text{Na}^+$ ) = 455.1618, Found 455.1620.

IR (neat) 3026, 2948, 1722, 1620, 1600, 1571, 1492, 1436, 1388, 1359, 1307, 1276, 1229, 1208, 1153, 1084, 1027, 965, 692, 529, 495  $\text{cm}^{-1}$ .

### Isopropyl 1-(cinnamyloxy)-4-(3-phenylprop-2-yn-1-yl)-2-naphthoate (A3)

White solid, Mp: 77–80 °C, 63% yield.

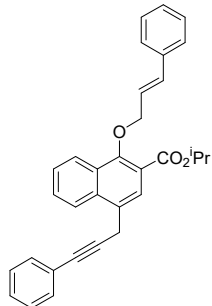

$^1\text{H NMR}$  (400 MHz, Chloroform-*d*)  $\delta$  8.39 (d,  $J = 8.4$  Hz, 1H), 8.14 – 8.08 (m, 2H), 7.68 (ddd,  $J = 8.4, 6.8, 1.4$  Hz, 1H), 7.60 (ddd,  $J = 8.1, 6.8, 1.2$  Hz, 1H), 7.46 (dt,  $J = 5.9, 2.3$  Hz, 4H), 7.37 – 7.33 (m, 2H), 7.29 (p,  $J = 3.8, 3.1$  Hz, 4H), 6.83 (d,  $J = 15.9$  Hz, 1H), 6.61 (dt,  $J = 15.9, 6.0$  Hz, 1H), 5.35 (hept,  $J = 6.1$  Hz, 1H), 4.84 (dd,  $J = 6.0, 1.5$  Hz, 2H), 4.19 (s, 2H), 1.42 (d,  $J = 6.2$  Hz, 6H).

$^{13}\text{C}$  NMR (101 MHz, Chloroform-*d*)  $\delta$  165.7, 156.0, 136.6, 134.5, 133.0, 131.6, 129.2, 128.6, 128.5, 128.4, 128.2, 127.9, 127.9, 126.6, 126.5, 126.4, 124.9, 124.5, 123.8, 123.5, 119.9, 86.8, 83.7, 76.5, 68.6, 23.5, 22.0.

HRMS (ESI) Calculated for  $\text{C}_{32}\text{H}_{28}\text{O}_3$  ( $[\text{M}]+\text{Na}^+$ ) = 483.1931, Found 483.1948.

IR (neat) 3027, 2979, 2934, 1715, 1620, 1600, 1572, 1492, 1448, 1416, 1388, 1362, 1306, 1275, 1227, 1206, 1154, 1107, 1082, 1027, 963, 835, 691, 529, 496, 425  $\text{cm}^{-1}$ .

#### Phenyl 1-(cinnamyloxy)-4-(3-phenylprop-2-yn-1-yl)-2-naphthoate (A4)

White solid, Mp: 96–99 °C, 60% yield.

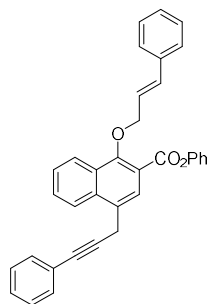

$^1\text{H NMR}$  (600 MHz, Chloroform-*d*)  $\delta$  8.46 (t,  $J$  = 6.5 Hz, 1H), 8.32 (q,  $J$  = 3.0 Hz, 1H), 8.18 (d,  $J$  = 8.3 Hz, 1H), 7.74 (t,  $J$  = 7.6 Hz, 1H), 7.67 (d,  $J$  = 7.6 Hz, 1H), 7.46 (h,  $J$  = 3.2 Hz, 4H), 7.42 (t,  $J$  = 5.8 Hz, 2H), 7.39 – 7.27 (m, 9H), 6.81 (dd,  $J$  = 15.9, 4.6 Hz, 1H), 6.67 – 6.60 (m, 1H), 4.93 (d,  $J$  = 5.4 Hz, 2H), 4.24 (s, 2H).

$^{13}\text{C}\{^1\text{H}\}$  NMR (151 MHz, Chloroform-*d*)  $\delta$  164.3, 157.4, 150.9, 136.4, 135.0, 133.6, 131.6, 129.5, 129.0, 128.8, 128.5, 128.2, 127.9, 126.7, 126.6, 126.5, 125.9, 124.7, 124.6, 123.9, 123.4, 121.8, 118.4, 86.7, 83.9, 77.0, 23.6.

HRMS (ESI) Calculated for  $\text{C}_{35}\text{H}_{26}\text{O}_3$  ( $[\text{M}] + \text{Na}^+$ ) = 517.1774, Found 517.1780.

IR (neat) 3059, 1738, 1620, 1595, 1571, 1491, 1452, 1415, 1388, 1358, 1306, 1274, 1191, 1160, 1140, 1069, 1025, 961, 897, 837, 756, 735, 689, 528, 499, 434  $\text{cm}^{-1}$ .

#### Ethyl 1-(cinnamyloxy)-4-(prop-2-yn-1-yl)-2-naphthoate (A5)

White solid, Mp: 81–84 °C, 82% yield.

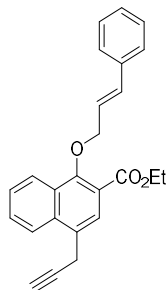

$^1\text{H NMR}$  (400 MHz, Chloroform-*d*)  $\delta$  8.39 (dd,  $J$  = 8.3, 1.3 Hz, 1H), 8.04 (dt,  $J$  = 8.6, 0.9 Hz, 1H), 8.02 (s, 1H), 7.68 (ddd,  $J$  = 8.4, 6.8, 1.4 Hz, 1H), 7.60 (ddd,  $J$  = 8.1, 6.8, 1.2 Hz, 1H), 7.48 – 7.44 (m, 2H), 7.38 – 7.33 (m, 2H), 7.31 – 7.26 (m, 1H), 6.81 (d,  $J$  = 15.9 Hz, 1H), 6.60 (dt,  $J$  = 15.9, 6.1 Hz, 1H), 4.82 (dd,  $J$  = 6.1, 1.4 Hz, 2H), 4.45 (q,  $J$  = 7.1 Hz, 2H), 3.97 (dd,  $J$  = 2.7, 0.9 Hz, 2H), 2.28 (t,  $J$  = 2.7 Hz, 1H), 1.44 (t,  $J$  = 7.1 Hz, 3H).

$^{13}\text{C NMR}$  (101 MHz, Chloroform-*d*)  $\delta$  166.2, 156.2, 136.5, 134.4, 133.1, 128.6, 128.6, 127.9, 127.8, 126.6, 126.5, 124.8, 124.6, 123.7, 119.5, 81.22, 76.6, 71.5, 61.2, 22.5, 14.4.

HRMS (ESI) Calculated for  $\text{C}_{25}\text{H}_{22}\text{O}_3$  ( $[\text{M}] + \text{Na}^+$ ) = 393.1461, Found 393.1465.

IR (neat) 3295, 2981, 1719, 1621, 1602, 1572, 1508, 1450, 1416, 1394, 1356, 1302, 1277, 1206, 1155, 1084, 1021, 965, 890, 765, 693, 645, 496  $\text{cm}^{-1}$ .

#### Ethyl 1-(cinnamyloxy)-4-(ethoxymethyl)-2-naphthoate (A6)

White solid, Mp: 39–42 °C, 55% yield.

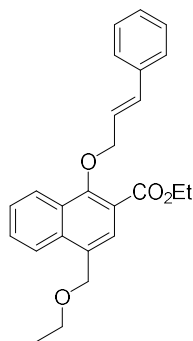

$^1\text{H NMR}$  (400 MHz, Chloroform-*d*)  $\delta$  8.38 – 8.33 (m, 1H), 8.16 – 8.11 (m, 1H), 7.91 (s, 1H), 7.64 (ddd,  $J$  = 8.4, 6.8, 1.4 Hz, 1H), 7.57 (ddd,  $J$  = 8.2, 6.8, 1.3 Hz, 1H), 7.46 – 7.42 (m, 2H), 7.36 – 7.31 (m, 2H), 7.28 – 7.24 (m, 1H), 6.80 (d,  $J$  = 15.8 Hz, 1H), 6.58 (dt,  $J$  = 15.9, 6.1 Hz, 1H), 4.90 (s, 2H), 4.81 (dd,  $J$  = 6.1, 1.4 Hz, 2H), 4.44 (q,  $J$  = 7.1 Hz, 2H), 3.63 (q,  $J$  = 7.0 Hz, 2H), 1.43 (t,  $J$  = 7.1 Hz, 3H), 1.27 (t,  $J$  = 7.0 Hz, 3H).

$^{13}\text{C NMR}$  (101 MHz, Chloroform-*d*)  $\delta$  166.2, 156.9, 136.5, 135.0, 133.1, 129.9, 129.2, 128.5, 127.9, 127.4, 126.6, 126.4, 124.7, 124.4, 124.2, 119.1, 76.6, 70.9, 65.9, 61.2, 15.2, 14.3.

HRMS (ESI) Calculated for  $\text{C}_{25}\text{H}_{26}\text{O}_4$  ( $[\text{M}] + \text{Na}^+$ ) = 413.1723, Found 413.1724.

IR (neat) 2975, 2864, 1719, 1620, 1571, 1507, 1449, 1419, 1394, 1353, 1277, 1220, 1154, 1087, 1021, 963, 765, 692, 496, 435  $\text{cm}^{-1}$ .



### Ethyl 4-benzyl-1-(cinnamyloxy)-2-naphthoate (A7)

Colorless oil, 91% yield.

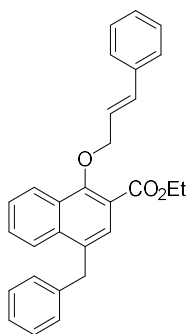

$^1\text{H NMR}$  (400 MHz, Chloroform-*d*)  $\delta$  8.37 (dd,  $J = 6.3, 3.6$  Hz, 1H), 7.95 (dt,  $J = 6.9, 3.4$  Hz, 1H), 7.77 (s, 1H), 7.54 (dt,  $J = 6.5, 2.9$  Hz, 2H), 7.48 – 7.44 (m, 2H), 7.35 (t,  $J = 7.3$  Hz, 2H), 7.30 – 7.25 (m, 3H), 7.20 (d,  $J = 7.4$  Hz, 3H), 6.82 (d,  $J = 15.8$  Hz, 1H), 6.61 (dt,  $J = 15.9, 6.0$  Hz, 1H), 4.84 (dd,  $J = 6.0, 1.4$  Hz, 2H), 4.47 – 4.40 (m, 4H), 1.44 (d,  $J = 7.1$  Hz, 3H).

$^{13}\text{C}\{^1\text{H}\}$  NMR (101 MHz, Chloroform-*d*)  $\delta$  166.4, 155.7, 140.2, 136.5, 135.3, 133.0, 132.4, 129.3, 128.6, 128.5, 128.5, 128.3, 127.9, 127.9, 126.6, 126.2, 126.1, 124.9, 124.7, 124.4, 119.5, 76.5, 61.2, 38.8, 14.34.

**HRMS** (ESI) Calculated for  $\text{C}_{29}\text{H}_{26}\text{O}_3$  ( $[\text{M}+\text{Na}^+]$ ) = 445.1774, Found 445.1775.

**IR** (neat) 3026, 2979, 1718, 1619, 1600, 1571, 1494, 1450, 1416, 1393, 1355, 1276, 1225, 1205, 1152, 1081, 1022, 962, 866, 802, 765, 730, 694, 559, 495, 459  $\text{cm}^{-1}$ .

### Ethyl 4-chloro-1-(cinnamyloxy)-2-naphthoate (A8)

White solid, Mp: 66–69 °C, 84% yield.

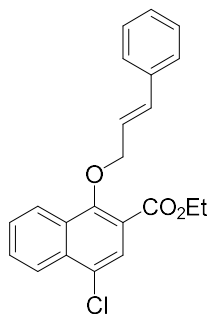

$^1\text{H NMR}$  (400 MHz, Chloroform-*d*)  $\delta$  8.37 (dt,  $J = 8.3, 1.1$  Hz, 1H), 8.26 (dt,  $J = 8.4, 0.9$  Hz, 1H), 8.02 (s, 1H), 7.72 (ddd,  $J = 8.4, 6.8, 1.3$  Hz, 1H), 7.66 – 7.61 (m, 1H), 7.46 – 7.43 (m, 2H), 7.37 – 7.33 (m, 2H), 7.32 – 7.26 (m, 1H), 6.80 (d,  $J = 15.9$  Hz, 1H), 6.58 (dt,  $J = 15.9, 6.1$  Hz, 1H), 4.83 (dd,  $J = 6.1, 1.4$  Hz, 2H), 4.47 – 4.42 (m, 2H), 1.44 (t,  $J = 7.1$  Hz, 3H).

$^{13}\text{C}\{^1\text{H}\}$  NMR (101 MHz, Chloroform-*d*)  $\delta$  165.1, 155.8, 136.4, 133.6, 133.5, 130.0, 129.4, 128.6, 128.0, 127.3, 127.1, 126.7, 126.5, 124.7, 124.4, 124.3, 120.1, 76.8, 61.5, 14.3.

**HRMS** (ESI) Calculated for  $\text{C}_{22}\text{H}_{21}\text{ClO}_3$  ( $[\text{M}+\text{Na}^+]$ ) = 389.0915, Found 389.0913.

**IR** (neat) 2981, 1724, 1619, 1591, 1497, 1449, 1415, 1350, 1329, 1269, 1223, 1203, 1149, 1084, 1021, 966, 925, 801, 766, 732, 693, 532, 496  $\text{cm}^{-1}$ .

### Ethyl 1-(cinnamyloxy)-4-propyl-2-naphthoate (A9)

White solid, Mp: 31–34 °C, 66% yield.

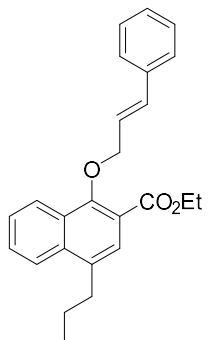

$^1\text{H NMR}$  (400 MHz, Chloroform-*d*)  $\delta$  8.37 (dd,  $J = 8.3, 1.4$  Hz, 1H), 8.04 (dd,  $J = 8.5, 1.6$  Hz, 1H), 7.73 (s, 1H), 7.64 – 7.54 (m, 2H), 7.48 – 7.44 (m, 2H), 7.38 – 7.33 (m, 2H), 7.31 – 7.26 (m, 1H), 6.82 (d,  $J = 14.3$  Hz, 1H), 6.61 (dt,  $J = 15.9, 6.0$  Hz, 1H), 4.81 (dd,  $J = 6.0, 1.4$  Hz, 2H), 4.45 (q,  $J = 7.1$  Hz, 2H), 3.06 – 3.00 (m, 2H), 1.84 – 1.75 (m, 2H), 1.45 (t,  $J = 7.1$  Hz, 3H), 1.06 (t,  $J = 7.3$  Hz, 3H).

$^{13}\text{C}\{^1\text{H}\}$  NMR (101 MHz, Chloroform-*d*)  $\delta$  166.6, 155.0, 136.6, 135.1, 134.7, 132.9, 129.1, 128.6, 128.0, 127.8, 126.6, 126.2, 126.0, 125.0, 124.4, 124.2, 119.4, 76.4, 61.1, 34.8, 23.8, 14.4, 14.2.

**HRMS** (ESI) Calculated for  $\text{C}_{25}\text{H}_{26}\text{O}_3$  ( $[\text{M}+\text{Na}^+]$ ) = 397.1774, Found 397.1773.

**IR** (neat) 2959, 2932, 2870, 1619, 1600, 1572, 1495, 1451, 1416, 1394, 1357, 1273, 1208, 1153, 1024, 964, 766, 693, 496, 434  $\text{cm}^{-1}$ .

### Ethyl 1-(cinnamyloxy)-4-cyclopropyl-2-naphthoate (A10)

Colorless oil, 84% yield.

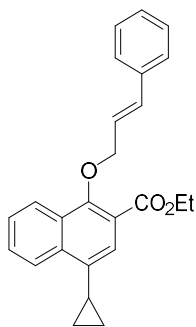

**<sup>1</sup>H NMR** (400 MHz, Chloroform-*d*) δ 8.43 (dt, *J* = 8.5, 0.9 Hz, 1H), 8.39 – 8.34 (m, 1H), 7.72 – 7.69 (m, 1H), 7.69 – 7.64 (m, 1H), 7.60 (ddd, *J* = 8.1, 6.8, 1.3 Hz, 1H), 7.49 – 7.45 (m, 2H), 7.39 – 7.34 (m, 2H), 7.31 – 7.26 (m, 1H), 6.83 (d, *J* = 15.9 Hz, 1H), 6.61 (dt, *J* = 15.9, 6.0 Hz, 1H), 4.82 (dd, *J* = 6.0, 1.4 Hz, 2H), 4.46 (q, *J* = 7.1 Hz, 2H), 2.29 (dddd, *J* = 8.4, 7.3, 4.2, 2.7 Hz, 1H), 1.45 (t, *J* = 7.1 Hz, 3H), 1.12 – 1.06 (m, 2H), 0.85 – 0.79 (m, 2H).

**<sup>13</sup>C{<sup>1</sup>H} NMR** (101 MHz, Chloroform-*d*) δ 166.6, 155.2, 136.6, 136.5, 135.00, 132.9, 128.7, 128.5, 128.1, 127.8, 126.6, 126.2, 124.9, 124.6, 124.6, 124.2, 119.4, 76.4, 61.1, 14.4, 13.0, 6.2.

**HRMS** (ESI) Calculated for C<sub>25</sub>H<sub>24</sub>O<sub>3</sub> ([M]<sup>+</sup>+Na<sup>+</sup>) = 395.1618, Found 395.1617.

**IR** (neat) 2980, 1702, 1599, 1571, 1496, 1448, 1404, 1372, 1332, 1268, 1225, 1205, 1151, 1081, 1021, 961, 896, 874, 801, 766, 750, 691, 634, 590, 495, 437 cm<sup>-1</sup>.

### 3-ethyl 1-methyl 4-(cinnamyloxy)naphthalene-1,3-dicarboxylate (A11)

White solid, Mp: 73–76 °C, 36% yield.

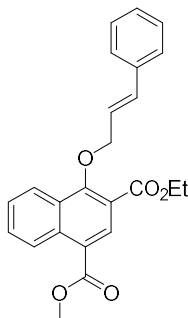

**<sup>1</sup>H NMR** (400 MHz, Chloroform-*d*) δ 9.00 (d, *J* = 8.5 Hz, 1H), 8.66 (s, 1H), 8.43 – 8.38 (m, 1H), 7.72 (ddd, *J* = 8.5, 6.8, 1.4 Hz, 1H), 7.61 (ddd, *J* = 8.4, 6.8, 1.2 Hz, 1H), 7.46 – 7.42 (m, 2H), 7.38 – 7.32 (m, 2H), 7.31 – 7.26 (m, 1H), 6.79 (d, *J* = 15.9 Hz, 1H), 6.56 (dt, *J* = 15.9, 6.1 Hz, 1H), 4.87 (dd, *J* = 6.2, 1.4 Hz, 2H), 4.47 (q, *J* = 7.1 Hz, 2H), 4.01 (s, 3H), 1.45 (t, *J* = 7.1 Hz, 3H).

**<sup>13</sup>C{<sup>1</sup>H} NMR** (101 MHz, Chloroform-*d*) δ 167.1, 165.6, 160.3, 136.3, 134.5, 133.8, 132.1, 130.0, 129.4, 128.6, 128.1, 126.9, 126.7, 126.1, 124.2, 124.1, 122.7, 118.7, 77.0, 61.5, 52.2, 14.4.

**HRMS** (ESI) Calculated for C<sub>22</sub>H<sub>24</sub>O<sub>5</sub> ([M]<sup>+</sup>+Na<sup>+</sup>) = 413.1359, Found 413.1362.

**IR** (neat) 2951, 1617, 1567, 1505, 1448, 1416, 1356, 1283, 1236, 1147, 1086, 1025, 963, 793, 770, 749, 693 cm<sup>-1</sup>.

### Ethyl 1-(cinnamyloxy)-4-ethoxy-2-naphthoate (A12)

White solid, Mp: 92-94 °C, 76% yield.

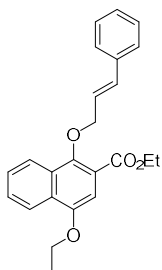

**<sup>1</sup>H NMR** (600 MHz, Chloroform-*d*) δ 8.33 – 8.29 (m, 1H), 8.27 (dd, *J* = 7.0, 2.7 Hz, 1H), 7.61 – 7.57 (m, 2H), 7.46 (d, *J* = 7.3 Hz, 2H), 7.35 (t, *J* = 7.5 Hz, 2H), 7.28 (m, 1H), 7.19 (s, 1H), 6.82 (d, *J* = 15.9 Hz, 1H), 6.60 (m, 1H), 4.78 (d, *J* = 5.6 Hz, 2H), 4.46 (q, *J* = 7.0 Hz, 2H), 4.25 (q, *J* = 7.0 Hz, 2H), 1.56 (t, *J* = 7.0 Hz, 3H), 1.45 (t, *J* = 7.1 Hz, 3H).

**<sup>13</sup>C NMR** (151 MHz, Chloroform-*d*) δ 166.6, 150.8, 150.1, 136.6, 132.7, 129.4, 128.8, 128.6, 127.8, 127.6, 127.0, 126.6, 125.1, 123.5, 122.4, 119.6, 104.4, 76.3, 64.0, 61.2, 14.8, 14.4.

**HRMS** (ESI) Calculated for C<sub>24</sub>H<sub>24</sub>O<sub>4</sub> ([M]<sup>+</sup>+Na<sup>+</sup>) = 399.1567, Found 399.1570.

**IR** (neat) 2981, 1701, 1595, 1453, 1349, 1272, 1228, 1157, 1101, 965, 863, 765, 693, 498 cm<sup>-1</sup>.

### Ethyl 4-benzyl-1-(cinnamyloxy)-6-methyl-2-naphthoate (A13)

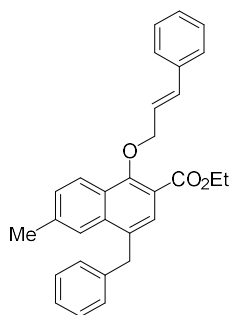

White solid, Mp: 60–63°C, 67% yield.

**<sup>1</sup>H NMR** (400 MHz, Chloroform-*d*) δ 8.27 (d, *J* = 8.6 Hz, 1H), 7.74 (d, *J* = 2.5 Hz, 2H), 7.46 (d, *J* = 7.1 Hz, 2H), 7.40 – 7.33 (m, 3H), 7.28 (ddd, *J* = 9.0, 6.0, 2.2 Hz, 3H), 7.21 (d, *J* = 7.5 Hz, 3H), 6.82 (d, *J* = 15.9 Hz, 1H), 6.61 (dt, *J* = 15.9, 6.0 Hz, 1H), 4.82 (dd, *J* = 6.0, 1.4 Hz, 2H), 4.43 (dd, *J* = 14.1, 6.9 Hz, 4H), 2.48 (s, 3H), 1.42 (t, *J* = 7.1 Hz, 3H).

**<sup>13</sup>C{<sup>1</sup>H} NMR** (101 MHz, Chloroform-*d*) δ 166.5, 155.8, 140.3, 138.5, 136.6, 135.6, 130.0, 131.7, 128.6, 128.5, 128.4, 128.4, 128.1, 127.8, 127.4, 126.6, 126.1, 125.0, 124.3, 123.8, 118.5, 76.5, 61.1, 38.6, 22.1, 14.4.

**HRMS** (ESI) Calculated for C<sub>30</sub>H<sub>28</sub>O<sub>3</sub> ([M]+Na<sup>+</sup>) = 459.1931, Found 459.1930.

**IR** (neat) 3026, 2979, 1718, 1624, 1602, 1573, 1495, 1449, 1412, 1369, 1351, 1280, 1199, 1154, 1086, 1026, 964, 829, 797, 733, 695, 589, 558, 509, 434 cm<sup>-1</sup>.

### Ethyl 4-benzyl-6-(tert-butyl)-1-(cinnamyloxy)-2-naphthoate (A14)

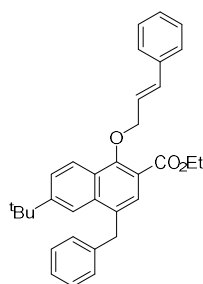

Colorless oil, 85% yield.

**<sup>1</sup>H NMR** (400 MHz, Chloroform-*d*) δ 8.27 (d, *J* = 8.9 Hz, 1H), 7.89 (d, *J* = 1.8 Hz, 1H), 7.78 (s, 1H), 7.60 (dd, *J* = 8.9, 1.9 Hz, 1H), 7.45 (d, *J* = 6.8 Hz, 2H), 7.34 (m, 2H), 7.26 (m, 5H), 7.17 (m, 1H), 6.81 (d, *J* = 15.8 Hz, 1H), 6.60 (dt, *J* = 15.9, 6.0 Hz, 1H), 4.81 (d, *J* = 4.9 Hz, 2H), 4.46 – 4.37 (m, 4H), 1.42 (t, *J* = 7.1 Hz, 3H), 1.32 (s, 9H).

**<sup>13</sup>C NMR** (101 MHz, Chloroform-*d*) δ 166.5, 155.8, 151.1, 140.5, 136.6, 135.2, 132.9, 132.6, 128.6, 128.6, 128.4, 127.9, 127.8, 127.4, 126.6, 126.1, 125.0, 125.0, 124.1, 120.2, 118.6, 61.1, 39.3, 35.2, 31.1, 14.4.

**HRMS** (ESI) Calculated for C<sub>31</sub>H<sub>26</sub>O<sub>3</sub> ([M]+Na<sup>+</sup>) = 501.2400, Found 501.2401.

**IR** (neat) 3028, 2960, 1715, 1622, 1573, 1491, 1452, 1405, 1358, 1286, 1221, 1116, 1080, 1024, 964, 838, 803, 732, 695, 618, 536, 497 cm<sup>-1</sup>.

### Ethyl 4-benzyl-1-(cinnamyloxy)-6-phenyl-2-naphthoate (A15)

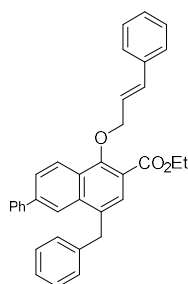

Colorless oil, 82% yield.

**<sup>1</sup>H NMR** (600 MHz, Chloroform-*d*) δ 8.42 (d, *J* = 8.6 Hz, 1H), 8.15 (s, 1H), 7.80 – 7.77 (m, 2H), 7.57 (d, *J* = 7.9 Hz, 2H), 7.46 (m, 4H), 7.39 – 7.33 (m, 3H), 7.26 (m, 5H), 7.20 (t, *J* = 6.9 Hz, 1H), 6.83 (d, *J* = 15.9 Hz, 1H), 6.62 (m, 1H), 4.85 (d, *J* = 6.0 Hz, 2H), 4.45 (d, *J* = 15.1 Hz, 4H), 1.43 (t, *J* = 7.0 Hz, 3H).

**<sup>13</sup>C NMR** (151 MHz, Chloroform-*d*) δ 166.4, 155.8, 140.9, 140.7, 140.3, 136.6, 135.6, 133.1, 132.7, 128.9, 128.6, 128.6, 128.5, 128.4, 128.4, 127.9, 127.8, 127.5, 126.7, 126.2, 125.9, 125.1, 124.9, 122.8, 119.3, 76.6, 61.2,

39.0, 14.4.

**HRMS** (ESI) Calculated for C<sub>31</sub>H<sub>26</sub>O<sub>3</sub> ([M]+Na<sup>+</sup>) = 521.2087, Found 521.2097.

**IR** (neat) 3028, 2981, 1716, 1618, 1571, 1492, 1452, 1407, 1351, 1284, 1230, 1196, 1091, 1024, 964, 839, 803, 760, 737, 697, 558 cm<sup>-1</sup>.

### Ethyl 4-benzyl-1-(cinnamyloxy)-6-methoxy-2-naphthoate (A16)

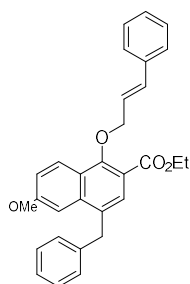

White solid, Mp: 85–87 °C, 54% yield.

**<sup>1</sup>H NMR** (600 MHz, Chloroform-*d*) δ 8.28 (d, *J* = 8.9 Hz, 1H), 7.82 (d, *J* = 2.4 Hz, 1H), 7.46 (d, *J* = 7.4 Hz, 2H), 7.36 (t, *J* = 7.6 Hz, 2H), 7.29 (m, 3H), 7.24 (m, 2H), 7.22 – 7.15 (m, 3H), 6.82 (d, *J* = 15.8 Hz, 1H), 6.61 (m, 1H), 4.83 (d, *J* = 5.3 Hz, 2H), 4.44 (q, *J* = 7.2 Hz, 2H), 4.37 (s, 2H), 3.79 (s, 3H), 1.44 (t, *J* = 7.1 Hz, 3H).

**<sup>13</sup>C NMR** (151 MHz, Chloroform-*d*) δ 166.4 , 159.5 , 156.2 , 140.2 , 137.0 , 136.5 , 133.0 , 131.0 , 128.9 , 128.6 , 128.5 , 128.5 , 127.8 , 126.6 , 126.2 , 126.2 , 124.9 , 124.4 , 118.4 , 117.0 , 103.7 , 76.5 , 61.0 , 55.2 , 39.3 , 14.4 .

**HRMS** (ESI) Calculated for C<sub>30</sub>H<sub>25</sub>O<sub>4</sub> ([M]<sup>+</sup>+Na<sup>+</sup>) = 475.1880, Found 475.1890.

**IR** (neat) 2979, 1714, 1619, 1577, 1500, 1468, 1420, 1350, 1274, 1231, 1200, 1089, 1025, 965, 743, 699, 493 cm<sup>-1</sup>.

### Ethyl 4-benzyl-6-chloro-1-(cinnamyloxy)-2-naphthoate (A17)

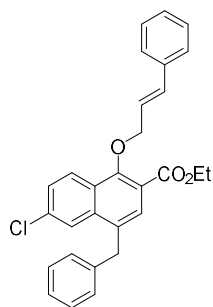

White solid, Mp: 69–72 °C, 70% yield.

**<sup>1</sup>H NMR** (400 MHz, Chloroform-*d*) δ 8.31 (d, *J* = 9.0 Hz, 1H), 7.95 (d, *J* = 2.1 Hz, 1H), 7.78 (s, 1H), 7.49 – 7.43 (m, 3H), 7.36 (dd, *J* = 8.3, 6.5 Hz, 2H), 7.30 (dd, *J* = 7.3, 2.3 Hz, 3H), 7.25 – 7.19 (m, 3H), 6.80 (d, *J* = 15.7 Hz, 1H), 6.58 (dt, *J* = 15.9, 6.1 Hz, 1H), 4.82 (dd, *J* = 6.1, 1.4 Hz, 2H), 4.44 (q, *J* = 7.1 Hz, 2H), 4.37 (s, 2H), 1.43 (t, *J* = 7.1 Hz, 3H).

**<sup>13</sup>C{<sup>1</sup>H} NMR** (101 MHz, Chloroform-*d*) δ 166.1 , 155.6 , 139.6 , 136.4 , 136.0 , 134.8 , 133.4 , 131.7 , 129.2 , 128.6 , 128.5 , 128.0 , 127.7 , 127.1 , 126.6 , 126.4 , 126.2 , 124.5 , 123.8 , 119.6 , 76.7 , 61.3 , 38.5 , 14.3 .

**HRMS** (ESI) Calculated for C<sub>29</sub>H<sub>25</sub>ClO<sub>3</sub> ([M]<sup>+</sup>+Na<sup>+</sup>) = 479.1384, Found 479.1389.

**IR** (neat) 3026, 2980, 1718, 1613, 1568, 1492, 1448, 1408, 1368, 1346, 1270, 1227, 1202, 1150, 1078, 1024, 961, 856, 829, 793, 730, 694, 621, 592, 555, 497, 459, 430 cm<sup>-1</sup>.

### Ethyl 4-benzyl-1-(cinnamyloxy)-6-cyano-2-naphthoate (A18)

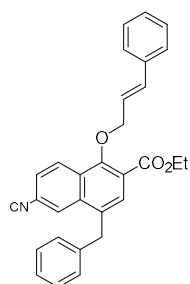

White solid, Mp: 84–86 °C, 73% yield.

**<sup>1</sup>H NMR** (600 MHz, Chloroform-*d*) δ 8.46 (d, *J* = 8.7 Hz, 1H), 8.33 (s, 1H), 7.85 (s, 1H), 7.67 (d, *J* = 8.7 Hz, 1H), 7.44 (d, *J* = 7.5 Hz, 2H), 7.36 (t, *J* = 7.5 Hz, 2H), 7.30 (m, 3H), 7.23 (t, *J* = 7.4 Hz, 1H), 7.17 (d, *J* = 7.5 Hz, 2H), 6.79 (d, *J* = 15.9 Hz, 1H), 6.55 (m, 1H), 4.83 (d, *J* = 6.2 Hz, 2H), 4.46 (q, *J* = 7.1 Hz, 2H), 4.42 (s, 2H), 1.44 (t, *J* = 7.2 Hz, 3H).

**<sup>13</sup>C NMR** (151 MHz, Chloroform-*d*) δ 165.8 , 155.0 , 139.1 , 136.2 , 134.1 , 133.8 , 133.0 , 131.1 , 130.6 , 129.7 , 128.7 , 128.6 , 128.4 , 128.1 , 126.8 , 126.6 , 125.8 , 124.1 , 122.4 , 118.9 , 111.7 , 76.9 , 61.6 , 38.5 , 14.3 .

**HRMS** (ESI) Calculated for C<sub>30</sub>H<sub>25</sub>NO<sub>3</sub> ([M]<sup>+</sup>+Na<sup>+</sup>) = 470.1727, Found 470.1734.

**IR** (neat) 3029, 2982, 2229, 1717, 1598, 1572, 1498, 1451, 1410, 1350, 1275, 1233, 1200, 1086, 1022, 963, 897, 838, 801, 738, 698, 540 cm<sup>-1</sup>.

### Ethyl 4-benzyl-1-(cinnamyloxy)-8-methyl-2-naphthoate (A19)

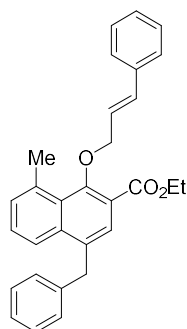

Colorless oil, 40% yield.

**<sup>1</sup>H NMR** (400 MHz, Chloroform-*d*) δ 7.81 (d, *J* = 8.4 Hz, 1H), 7.72 (s, 1H), 7.47 – 7.43 (m, 2H), 7.40 – 7.33 (m, 3H), 7.31 – 7.26 (m, 3H), 7.25 (s, 1H), 7.21 – 7.17 (m, 3H), 6.78 (d, *J* = 16.0 Hz, 1H), 6.55 (dt, *J* = 15.9, 5.9 Hz, 1H), 4.66 (dd, *J* = 5.9, 1.5 Hz, 2H), 4.46 – 4.39 (m, 4H), 2.98 (s, 3H), 1.41 (t, *J* = 7.2 Hz, 3H).

**<sup>13</sup>C{<sup>1</sup>H} NMR** (101 MHz, Chloroform-*d*) δ 167.0, 157.3, 140.3, 136.5, 132.9, 132.6, 129.9, 128.7, 128.6, 128.5, 128.4, 128.1, 127.8, 127.7, 126.6, 126.1, 124.7, 123.1, 120.8, 77.3, 61.2, 39.5, 24.8, 14.3.

**HRMS** (ESI) Calculated for C<sub>30</sub>H<sub>28</sub>O<sub>3</sub> ([M]<sup>+</sup>+Na<sup>+</sup>) = 459.1931, Found 459.1929.

**IR** (neat) 3026, 2978, 1719, 1605, 1570, 1494, 1451, 1413, 1370, 1351, 1264, 1236, 1205, 1135, 1111, 1069, 1024, 963, 821, 762, 731, 694, 620, 576, 554, 521, 494, 458 cm<sup>-1</sup>.

### Ethyl (E)-1-(((4-nitrophenyl)allyl)oxy)-4-(3-phenylprop-2-yn-1-yl)-2-naphthoate (A20)

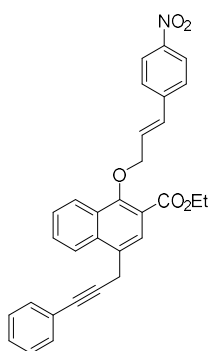

White solid, Mp: 125–128 °C, 55% yield.

**<sup>1</sup>H NMR** (400 MHz, Chloroform-*d*) δ 8.37 – 8.33 (m, 1H), 8.25 – 8.18 (m, 2H), 8.16 – 8.10 (m, 2H), 7.73 – 7.67 (m, 1H), 7.61 (dd, *J* = 15.1, 8.1 Hz, 3H), 7.45 (dd, *J* = 6.7, 3.0 Hz, 2H), 7.32 – 7.26 (m, 3H), 6.95 (d, *J* = 16.0 Hz, 1H), 6.77 (dt, *J* = 16.0, 5.5 Hz, 1H), 4.88 (dd, *J* = 5.4, 1.5 Hz, 2H), 4.44 (q, *J* = 7.1 Hz, 2H), 4.19 (s, 2H), 1.43 (t, *J* = 7.1 Hz, 3H).

**<sup>13</sup>C{<sup>1</sup>H} NMR** (101 MHz, Chloroform-*d*) δ 165.9, 155.9, 147.1, 143.1, 134.6, 131.6, 130.1, 129.9, 129.0, 128.8, 128.7, 128.2, 128.0, 127.1, 126.6, 126.4, 124.2, 124.0, 123.9, 123.4, 119.4, 86.7, 83.8, 75.6, 61.2, 23.5, 14.4.

**HRMS** (ESI) Calculated for C<sub>31</sub>H<sub>25</sub>NO<sub>5</sub> ([M]<sup>+</sup>+Na<sup>+</sup>) = 514.1625, Found 514.1633.

**IR** (neat) 2981, 1719, 1620, 1598, 1572, 1515, 1491, 1444, 1394, 1341, 1275, 1227, 1154, 1087, 1023, 970, 861, 759, 528 cm<sup>-1</sup>.

### Ethyl (E)-4-(3-phenylprop-2-yn-1-yl)-1-(((4-(trifluoromethyl)phenyl)allyl)oxy)-2-naphthoate (A21)

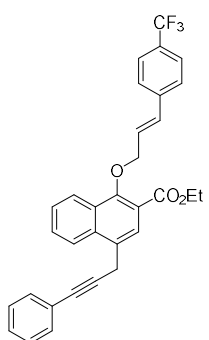

White solid, Mp: 129–132 °C, 66% yield.

**<sup>1</sup>H NMR** (400 MHz, Chloroform-*d*) δ 8.38 (dd, *J* = 8.4, 1.3 Hz, 1H), 8.13 (d, *J* = 7.8 Hz, 2H), 7.69 (ddd, *J* = 8.4, 6.8, 1.4 Hz, 1H), 7.66 – 7.58 (m, 3H), 7.55 (d, *J* = 8.2 Hz, 2H), 7.49 – 7.41 (m, 2H), 7.30 (qd, *J* = 4.0, 2.3 Hz, 3H), 6.88 (d, *J* = 15.8 Hz, 1H), 6.70 (dt, *J* = 15.9, 5.7 Hz, 1H), 4.86 (dd, *J* = 5.7, 1.5 Hz, 2H), 4.45 (q, *J* = 7.1 Hz, 2H), 4.19 (s, 2H), 1.43 (t, *J* = 7.1 Hz, 3H).

**<sup>13</sup>C{<sup>1</sup>H} NMR** (101 MHz, Chloroform-*d*) δ 166.0, 156.0, 140.1, 134.6, 131.6, 131.2, 129.7, 129.4, 129.1, 128.7, 128.6, 128.2, 127.9, 127.6, 126.8, 126.5, 126.5, 125.6, 125.6, 125.5, 125.5, 124.3, 123.9, 123.4, 122.8, 119.5, 86.7, 83.8, 76.0, 61.2, 23.5, 14.3.

**HRMS** (ESI) Calculated for C<sub>32</sub>H<sub>25</sub>F<sub>3</sub>O<sub>3</sub> ([M]<sup>+</sup>+Na<sup>+</sup>) = 537.1648, Found 537.1653.

**<sup>19</sup>F NMR** (377 MHz, Chloroform-*d*) δ -62.48.

**IR** (neat) 2982, 1719, 1618, 1572, 1491, 1445, 1416, 1394, 1358, 1325, 1275, 1228, 1161, 1120, 1087, 1067, 1018, 969, 858, 758, 692, 597 cm<sup>-1</sup>.

**Ethyl (E)-1-((3-(4-fluorophenyl)allyl)oxy)-4-(3-phenylprop-2-yn-1-yl)-2-naphthoate (A22)**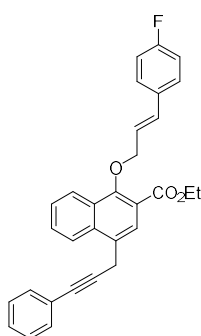

White solid, Mp: 80–83 °C, 28% yield.

**<sup>1</sup>H NMR** (400 MHz, Chloroform-d) δ 8.39 (dd, J = 8.4, 1.3 Hz, 1H), 8.12 (d, J = 9.5 Hz, 2H), 7.69 (ddd, J = 8.3, 6.8, 1.4 Hz, 1H), 7.61 (ddd, J = 8.1, 6.8, 1.2 Hz, 1H), 7.43 (dtd, J = 14.2, 5.3, 3.0 Hz, 4H), 7.30 (q, J = 2.8 Hz, 3H), 7.04 (t, J = 8.7 Hz, 2H), 6.78 (d, J = 15.9 Hz, 1H), 6.52 (dt, J = 15.9, 6.1 Hz, 1H), 4.82 (dd, J = 6.1, 1.4 Hz, 2H), 4.45 (q, J = 7.1 Hz, 2H), 4.19 (s, 2H), 1.44 (t, J = 7.1 Hz, 3H).

**<sup>13</sup>C{<sup>1</sup>H} NMR** (101 MHz, Chloroform-d) δ 166.1, 162.5 (d, <sup>1</sup>J<sub>FC</sub> = 247.0 Hz), 156.1, 134.6, 132.7, 132.0, 131.6, 129.2, 128.6, 128.5, 128.2 (d, <sup>3</sup>J<sub>FC</sub> = 6.7 Hz), 127.9, 126.5, 126.4, 124.6 (d, <sup>4</sup>J<sub>FC</sub> = 2.2 Hz), 124.5, 123.8, 123.5, 119.5, 115.5 (d, <sup>2</sup>J<sub>FC</sub> = 21.7 Hz), 86.8, 83.7, 76.5, 61.2, 23.5, 14.3.

**<sup>19</sup>F NMR** (377 MHz, Chloroform-d) δ -113.98.

**HRMS** (ESI) Calculated for C<sub>31</sub>H<sub>25</sub>FO<sub>3</sub> ([M]<sup>+</sup>+Na<sup>+</sup>) = 487.1680, Found 487.1684.

**IR** (neat) 2982, 1720, 1621, 1600, 1571, 1508, 1445, 1394, 1356, 1306, 1275, 1155, 1085, 1023, 965, 847, 758, 692, 525 cm<sup>-1</sup>.

**Ethyl (E)-1-((3-(4-bromophenyl)allyl)oxy)-4-(3-phenylprop-2-yn-1-yl)-2-naphthoate (A23)**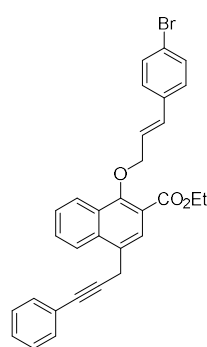

White solid, Mp: 123–126 °C, 31% yield.

**<sup>1</sup>H NMR** (400 MHz, Chloroform-d) δ 8.37 (dd, J = 8.4, 1.3 Hz, 1H), 8.17 – 8.06 (m, 2H), 7.69 (ddd, J = 8.4, 6.8, 1.4 Hz, 1H), 7.60 (ddd, J = 8.1, 6.8, 1.2 Hz, 1H), 7.50 – 7.42 (m, 4H), 7.34 – 7.27 (m, 5H), 6.77 (d, J = 15.9 Hz, 1H), 6.59 (dt, J = 15.9, 5.9 Hz, 1H), 4.82 (dd, J = 5.9, 1.4 Hz, 2H), 4.44 (q, J = 7.1 Hz, 2H), 4.19 (s, 2H), 1.43 (t, J = 7.1 Hz, 3H).

**<sup>13</sup>C{<sup>1</sup>H} NMR** (101 MHz, Chloroform-d) δ 166.1, 156.1, 135.5, 134.6, 131.8, 131.7, 131.6, 129.1, 128.6, 128.6, 128.2, 128.2, 127.9, 126.5, 125.7, 124.4, 123.9, 123.5, 121.7, 119.5, 86.8, 83.8, 76.3, 61.2, 23.5, 14.4.

**HRMS** (ESI) Calculated for C<sub>31</sub>H<sub>25</sub>BrO<sub>3</sub> ([M]<sup>+</sup>+Na<sup>+</sup>) = 547.0879, Found 547.0887.

**HRMS** (ESI) Calculated for C<sub>31</sub>H<sub>25</sub><sup>81</sup>BrO<sub>3</sub> ([M]<sup>+</sup>+Na<sup>+</sup>) = 549.0859, Found 549.0865.

**IR** (neat) 2980, 1620, 1600, 1571, 1508, 1488, 1444, 1394, 1356, 1306, 1275, 1226, 1153, 1084, 1009, 965, 835, 758, 692, 528, 499 cm<sup>-1</sup>.

**Ethyl (E)-1-((3-(4-chlorophenyl)allyl)oxy)-4-(3-phenylprop-2-yn-1-yl)-2-naphthoate (A24)**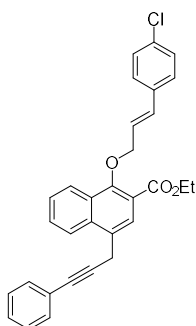

White solid, Mp: 119–122 °C, 39% yield.

**<sup>1</sup>H NMR** (400 MHz, Chloroform-d) δ 8.38 (dd, J = 8.4, 1.3 Hz, 1H), 8.12 (d, J = 9.2 Hz, 2H), 7.72 – 7.66 (m, 1H), 7.61 (ddd, J = 8.1, 6.8, 1.2 Hz, 1H), 7.49 – 7.43 (m, 2H), 7.38 (d, J = 8.5 Hz, 2H), 7.34 – 7.27 (m, 5H), 6.78 (d, J = 15.9 Hz, 1H), 6.58 (dt, J = 15.9, 6.0 Hz, 1H), 4.82 (dd, J = 5.9, 1.4 Hz, 2H), 4.44 (q, J = 7.1 Hz, 2H), 4.19 (s, 2H), 1.43 (t, J = 7.1 Hz, 3H).

**<sup>13</sup>C{<sup>1</sup>H} NMR** (101 MHz, Chloroform-d) δ 166.1, 156.1, 135.1, 134.6, 133.5, 131.8, 131.6, 129.1, 128.8, 128.6, 128.6, 128.2, 127.9, 127.8, 126.5, 125.5, 124.4, 123.8, 123.5, 119.5, 86.8, 83.8, 76.3, 61.2, 23.5, 14.3.

**HRMS** (ESI) Calculated for C<sub>31</sub>H<sub>25</sub>ClO<sub>3</sub> ([M]<sup>+</sup>+Na<sup>+</sup>) = 503.1384, Found 503.1389.

**IR** (neat) 2980, 1620, 1600, 1571, 1490, 1444, 1394, 1358, 1306, 1275, 1226, 1153, 1087, 1016, 965, 851, 692, 528, 504 cm<sup>-1</sup>.

**Ethyl (E)-4-(3-phenylprop-2-yn-1-yl)-1-((3-(p-tolyl)allyl)oxy)-2-naphthoate (A25)**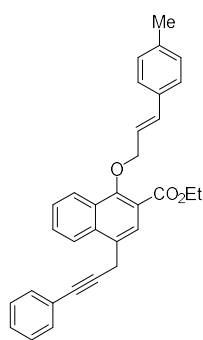

White solid, Mp: 90–93 °C, 30% yield.

<sup>1</sup>H NMR (400 MHz, Chloroform-d) δ 8.40 (dd, J = 8.4, 1.4 Hz, 1H), 8.15 – 8.08 (m, 2H), 7.68 (ddd, J = 8.4, 6.8, 1.4 Hz, 1H), 7.60 (ddd, J = 8.2, 6.8, 1.2 Hz, 1H), 7.45 (dd, J = 6.6, 3.0 Hz, 2H), 7.35 (d, J = 7.9 Hz, 2H), 7.32 – 7.27 (m, 3H), 7.16 (d, J = 8.0 Hz, 2H), 6.77 (d, J = 15.9 Hz, 1H), 6.55 (dt, J = 15.9, 6.2 Hz, 1H), 4.82 (dd, J = 6.2, 1.4 Hz, 2H), 4.45 (q, J = 7.1 Hz, 2H), 4.19 (s, 2H), 2.36 (s, 3H), 1.44 (t, J = 7.1 Hz, 3H).

<sup>13</sup>C{<sup>1</sup>H} NMR (101 MHz, Chloroform-d) δ 166.2, 156.2, 137.8, 134.6, 133.7, 133.3, 131.6, 129.3, 129.2, 128.6, 128.4, 128.2, 127.9, 126.6, 126.5, 126.4, 124.6, 123.8, 123.7, 123.5, 119.5, 86.8, 83.7, 76.8, 61.2, 23.5, 21.2, 14.4.

**HRMS** (ESI) Calculated for C<sub>32</sub>H<sub>28</sub>O<sub>3</sub> ([M]<sup>+</sup>+Na<sup>+</sup>) = 483.1931, Found 483.1934.

**IR** (neat) 2980, 1620, 1601, 1571, 1511, 1490, 1445, 1416, 1394, 1356, 1306, 1275, 1226, 1153, 1084, 1023, 966, 832, 756, 692, 525, 502 cm<sup>-1</sup>.

**Ethyl (E)-1-((3-(4-methoxyphenyl)allyl)oxy)-4-(3-phenylprop-2-yn-1-yl)-2-naphthoate (A26)**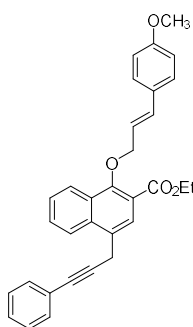

White solid, Mp: 97–100 °C, 36% yield.

<sup>1</sup>H NMR (600 MHz, Chloroform-d) δ 8.10 (dd, J = 7.8, 1.4 Hz, 1H), 7.65 (td, J = 7.5, 1.5 Hz, 1H), 7.54 (dd, J = 8.0, 1.0 Hz, 1H), 7.42 (td, J = 7.5, 1.1 Hz, 1H), 7.34 – 7.30 (m, 2H), 7.30 – 7.23 (m, 3H), 7.08 – 7.03 (m, 2H), 6.69 – 6.63 (m, 2H), 6.42 – 6.34 (m, 2H), 5.87 (ddd, J = 15.4, 8.1, 7.0 Hz, 1H), 4.21 – 4.13 (m, 2H), 3.76 – 3.67 (m, 5H), 3.09 – 3.00 (m, 2H), 1.18 (t, J = 7.1 Hz, 3H).

<sup>13</sup>C{<sup>1</sup>H} NMR (151 MHz, Chloroform-d) δ 196.2, 169.7, 158.8, 137.1, 134.7, 133.5, 131.5, 130.3, 129.9, 128.8, 129.2, 128.4, 128.2, 128.0, 127.5, 127.3, 124.0, 123.2, 121.3, 113.7, 85.6, 84.2, 61.9, 60.8, 55.2, 40.3, 23.7, 13.9.

**HRMS** (ESI) Calculated for C<sub>32</sub>H<sub>28</sub>O<sub>4</sub> ([M]<sup>+</sup>+Na<sup>+</sup>) = 499.1880, Found 499.1880.

**IR** (neat) 2980, 2836, 1738, 1678, 1605, 1574, 1511, 1489, 1444, 1393, 1366, 1300, 1247, 1209, 1175, 1083, 1032, 967, 843, 802, 757, 692, 527 cm<sup>-1</sup>.

**Ethyl (E)-1-((3-(3-chlorophenyl)allyl)oxy)-4-(3-phenylprop-2-yn-1-yl)-2-naphthoate (A27)**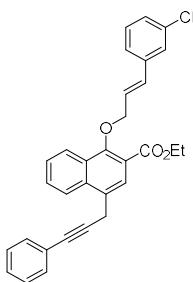

White solid, Mp: 110–113 °C, 24% yield.

<sup>1</sup>H NMR (400 MHz, Chloroform-d) δ 8.36 (dd, J = 8.4, 1.3 Hz, 1H), 8.12 (d, J = 10.6 Hz, 2H), 7.68 (ddd, J = 8.4, 6.8, 1.4 Hz, 1H), 7.60 (ddd, J = 8.1, 6.8, 1.2 Hz, 1H), 7.49 – 7.41 (m, 3H), 7.34 – 7.23 (m, 6H), 6.77 (d, J = 15.7 Hz, 1H), 6.60 (dt, J = 15.9, 5.8 Hz, 1H), 4.82 (dd, J = 5.9, 1.5 Hz, 2H), 4.44 (q, J = 7.1 Hz, 2H), 4.18 (s, 2H), 1.43 (t, J = 7.1 Hz, 3H).

<sup>13</sup>C{<sup>1</sup>H} NMR (101 MHz, Chloroform-d) δ 166.0, 156.1, 138.5, 134.6, 134.5, 131.6, 131.5, 129.8, 129.1, 128.6, 128.6, 128.2, 127.9, 127.8, 126.6, 126.5, 126.5, 124.8, 124.4, 123.9, 123.5, 119.5, 86.8, 83.8, 76.1, 61.2, 23.5, 14.4.

**HRMS** (ESI) Calculated for C<sub>32</sub>H<sub>25</sub>ClO<sub>3</sub> ([M]<sup>+</sup>+Na<sup>+</sup>) = 503.1384, Found 503.1386.

**IR** (neat) 2980, 1621, 1596, 1569, 1508, 1490, 1475, 1418, 1394, 1356, 1307, 1275, 1227, 1207, 1154, 1085, 1023, 963, 888, 691, 527, 436 cm<sup>-1</sup>.

**Ethyl (E)-4-(3-phenylprop-2-yn-1-yl)-1-((3-(m-tolyl)allyl)oxy)-2-naphthoate (A28)**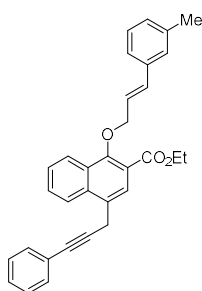

White solid, Mp: 92–95 °C, 68% yield.

**<sup>1</sup>H NMR** (400 MHz, Chloroform-d) δ 8.39 (dd, J = 8.4, 1.3 Hz, 1H), 8.10 (t, J = 4.2 Hz, 2H), 7.66 (ddd, J = 8.4, 6.8, 1.5 Hz, 1H), 7.59 (ddd, J = 8.2, 6.8, 1.2 Hz, 1H), 7.48 – 7.41 (m, 2H), 7.32 – 7.21 (m, 6H), 7.08 (dd, J = 6.8, 1.9 Hz, 1H), 6.77 (d, J = 15.9 Hz, 1H), 6.58 (dt, J = 15.9, 6.1 Hz, 1H), 4.81 (dd, J = 6.0, 1.4 Hz, 2H), 4.44 (q, J = 7.1 Hz, 2H), 4.17 (s, 2H), 2.35 (s, 3H), 1.43 (t, J = 7.1 Hz, 3H).

**<sup>13</sup>C{<sup>1</sup>H} NMR** (101 MHz, Chloroform-d) δ 166.2, 156.2, 138.1, 136.5, 134.6, 133.3, 131.6, 129.2, 128.7, 128.5, 128.5, 128.4, 128.2, 127.9, 127.4, 126.5, 126.4, 124.6, 124.5, 123.8, 123.5, 119.4, 86.8, 83.7, 76.7, 61.2, 23.5, 21.4, 14.3.

**HRMS** (ESI) Calculated for C<sub>32</sub>H<sub>28</sub>O<sub>3</sub> ([M]<sup>+</sup>+Na<sup>+</sup>) = 483.1931, Found 483.1932.

**IR** (neat) 2980, 1719, 1620, 1601, 1571, 1508, 1489, 1444, 1416, 1393, 1354, 1307, 1275, 1224, 1153, 1084, 1023, 963, 691, 526, 435 cm<sup>-1</sup>.

**Ethyl (E)-1-((3-(2-chlorophenyl)allyl)oxy)-4-(3-phenylprop-2-yn-1-yl)-2-naphthoate (A29)**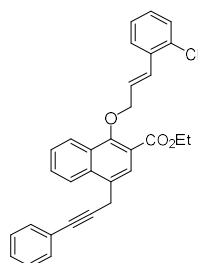

White solid, Mp: 112–115 °C, 58% yield.

**<sup>1</sup>H NMR** (400 MHz, Chloroform-d) δ 8.40 (dd, J = 8.3, 1.5 Hz, 1H), 8.17 – 8.03 (m, 2H), 7.67 (ddd, J = 8.4, 6.8, 1.4 Hz, 1H), 7.60 (dtd, J = 6.8, 3.5, 1.2 Hz, 2H), 7.48 – 7.40 (m, 2H), 7.36 (dd, J = 7.7, 1.6 Hz, 1H), 7.27 (tt, J = 5.5, 2.2 Hz, 3H), 7.26 – 7.16 (m, 3H), 6.58 (dt, J = 15.9, 6.1 Hz, 1H), 4.86 (dd, J = 6.0, 1.6 Hz, 2H), 4.45 (q, J = 7.2 Hz, 2H), 4.17 (s, 2H), 1.43 (t, J = 7.1 Hz, 3H).

**<sup>13</sup>C{<sup>1</sup>H} NMR** (101 MHz, Chloroform-d) δ 166.13, 156.11, 134.67, 134.58, 133.23, 131.58, 129.68, 129.24, 128.85, 128.57, 128.51, 128.18, 127.87, 127.73, 127.05, 126.86, 126.46, 124.51, 123.79, 123.46, 119.42, 86.79, 83.74, 76.39, 61.20, 23.46, 14.36.

**HRMS** (ESI) Calculated for C<sub>31</sub>H<sub>25</sub>ClO<sub>3</sub> ([M]<sup>+</sup>+Na<sup>+</sup>) = 503.1384, Found 503.1386.

**IR** (neat) 2981, 1719, 1620, 1600, 1571, 1508, 1490, 1470, 1442, 1416, 1394, 1356, 1307, 1275, 1227, 1207, 1154, 1085, 1029, 964, 693, 527, 450 cm<sup>-1</sup>.

**Ethyl (E)-4-(3-phenylprop-2-yn-1-yl)-1-((3-(o-tolyl)allyl)oxy)-2-naphthoate (A30)**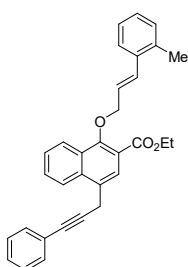

White solid, Mp: 95–98 °C, 55% yield.

**<sup>1</sup>H NMR** (400 MHz, Chloroform-d) δ 8.42 (dd, J = 8.4, 1.3 Hz, 1H), 8.12 (d, J = 11.0 Hz, 2H), 7.69 (ddd, J = 8.3, 6.8, 1.4 Hz, 1H), 7.61 (ddd, J = 8.1, 6.9, 1.1 Hz, 1H), 7.54 – 7.49 (m, 1H), 7.45 (dd, J = 6.7, 2.9 Hz, 2H), 7.30 (q, J = 2.8 Hz, 3H), 7.23 – 7.13 (m, 3H), 6.99 (d, J = 15.5 Hz, 1H), 6.48 (dt, J = 15.7, 6.2 Hz, 1H), 4.86 (dd, J = 6.2, 1.4 Hz, 2H), 4.45 (q, J = 7.1 Hz, 2H), 4.19 (s, 2H), 2.36 (s, 3H), 1.44 (t, J = 7.1 Hz, 3H).

**<sup>13</sup>C{<sup>1</sup>H} NMR** (101 MHz, Chloroform-d) δ 166.2, 156.2, 135.7, 134.6, 131.6, 131.3, 130.3, 129.3, 128.6, 128.4, 128.2, 127.9, 127.8, 126.5, 126.4, 126.1, 126.1, 125.9, 124.6, 123.8, 123.5, 119.5, 86.8, 83.7, 76.9, 61.2, 23.5, 19.8, 14.4

**HRMS** (ESI) Calculated for C<sub>32</sub>H<sub>28</sub>O<sub>3</sub> ([M]<sup>+</sup>+Na<sup>+</sup>) = 483.1931, Found 483.1934.

**IR** (neat) 2979, 1719, 1620, 1600, 1571, 1507, 1488, 1458, 1415, 1394, 1354, 1306, 1275, 1224, 1153, 1084, 1023, 964, 692, 527, 449 cm<sup>-1</sup>.



### Ethyl (E)-1-((3-(2-methoxyphenyl)allyl)oxy)-4-(3-phenylprop-2-yn-1-yl)-2-naphthoate (A31)

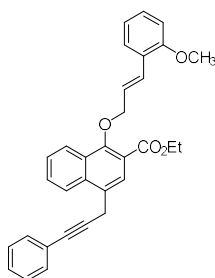

White solid, Mp: 92–98 °C, 63% yield.

**<sup>1</sup>H NMR** (400 MHz, Chloroform-*d*) δ 8.42 (dd, *J* = 8.5, 1.3 Hz, 1H), 8.15 – 8.07 (m, 2H), 7.67 (ddd, *J* = 8.4, 6.8, 1.4 Hz, 1H), 7.60 (ddd, *J* = 8.1, 6.8, 1.2 Hz, 1H), 7.51 (dd, *J* = 7.6, 1.6 Hz, 1H), 7.44 (dd, *J* = 6.7, 2.9 Hz, 2H), 7.31 – 7.27 (m, 3H), 7.24 (dd, *J* = 8.2, 0.9 Hz, 1H), 7.10 (d, *J* = 16.0 Hz, 1H), 6.95 (td, *J* = 7.5, 1.1 Hz, 1H), 6.88 (dd, *J* = 8.2, 1.0 Hz, 1H), 6.62 (dt, *J* = 16.0, 6.3 Hz, 1H), 4.84 (dd, *J* = 6.4, 1.4 Hz, 2H), 4.46 (q, *J* = 7.1 Hz, 2H), 4.18 (s, 2H), 3.85 (s, 3H), 1.44 (t, *J* = 7.2 Hz, 3H).

**<sup>13</sup>C{<sup>1</sup>H} NMR** (101 MHz, Chloroform-*d*) δ 166.3, 156.9, 156.3, 134.6, 131.6, 129.3, 129.0, 128.5, 128.4, 128.3, 128.2, 127.9, 127.2, 126.5, 126.3, 125.5, 125.4, 124.7, 123.7, 123.5, 120.6, 119.4, 110.8, 86.9, 83.7, 61.2, 55.4, 23.5, 14.3.

**HRMS** (ESI) Calculated for C<sub>32</sub>H<sub>28</sub>O<sub>4</sub> ([M]<sup>+</sup>+Na<sup>+</sup>) = 499.1880, Found 499.1879.

**IR** (neat) 2979, 1720, 1620, 1598, 1573, 1489, 1461, 1416, 1394, 1355, 1305, 1275, 1242, 1155, 1084, 1027, 972, 692, 527 cm<sup>-1</sup>.

### Ethyl (E)-1-((3-(naphthalen-1-yl)allyl)oxy)-4-(3-phenylprop-2-yn-1-yl)-2-naphthoate (A32)

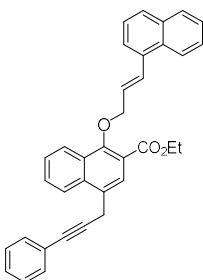

White solid, Mp: 112–115 °C, 60% yield.

**<sup>1</sup>H NMR** (400 MHz, Chloroform-*d*) δ 8.48 (dd, *J* = 8.3, 1.5 Hz, 1H), 8.20 – 8.05 (m, 3H), 7.86 (dd, *J* = 7.6, 2.0 Hz, 1H), 7.81 (d, *J* = 8.2 Hz, 1H), 7.72 – 7.61 (m, 3H), 7.58 – 7.44 (m, 6H), 7.30 (qd, *J* = 4.1, 2.2 Hz, 3H), 6.62 (dt, *J* = 15.5, 6.1 Hz, 1H), 4.96 (dd, *J* = 6.1, 1.6 Hz, 2H), 4.47 (q, *J* = 7.1 Hz, 2H), 4.20 (s, 2H), 1.44 (t, *J* = 7.2 Hz, 3H).

**<sup>13</sup>C{<sup>1</sup>H} NMR** (101 MHz, Chloroform-*d*) δ 166.2, 156.2, 134.6, 134.3, 133.6, 131.6, 131.1, 130.6, 129.3, 128.6, 128.5, 128.2, 128.0, 127.9, 126.5, 126.5, 126.1, 125.8, 125.6, 124.6, 124.1, 123.8, 123.8, 123.5, 119.5, 86.8, 83.7, 61.2, 23.5, 14.4.

**HRMS** (ESI) Calculated for C<sub>35</sub>H<sub>28</sub>O<sub>3</sub> ([M]<sup>+</sup>+Na<sup>+</sup>) = 519.1931, Found 519.1936.

**IR** (neat) 3058, 2980, 1620, 1599, 1571, 1508, 1490, 1444, 1416, 1393, 1357, 1307, 1275, 1227, 1154, 1084, 1022, 961, 692, 527, 425 cm<sup>-1</sup>.

### Ethyl (E)-4-(3-phenylprop-2-yn-1-yl)-1-((3-(thiophen-2-yl)allyl)oxy)-2-naphthoate (A33)

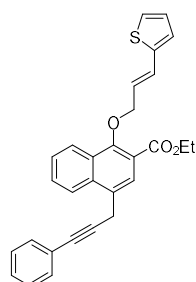

White solid, Mp: 80–83 °C, 20% yield.

**<sup>1</sup>H NMR** (400 MHz, Chloroform-*d*) δ 8.38 (dd, *J* = 8.4, 1.3 Hz, 1H), 8.12 (d, *J* = 7.0 Hz, 2H), 7.69 (ddd, *J* = 8.3, 6.8, 1.4 Hz, 1H), 7.61 (ddd, *J* = 8.2, 6.9, 1.2 Hz, 1H), 7.46 (dd, *J* = 6.5, 3.0 Hz, 2H), 7.30 (dq, *J* = 4.9, 2.8 Hz, 3H), 7.21 (d, *J* = 5.0 Hz, 1H), 7.06 – 6.93 (m, 3H), 6.44 (dt, *J* = 15.7, 6.1 Hz, 1H), 4.80 (dd, *J* = 6.1, 1.4 Hz, 2H), 4.46 (q, *J* = 7.1 Hz, 2H), 4.19 (s, 2H), 1.45 (t, *J* = 7.1 Hz, 3H).

**<sup>13</sup>C{<sup>1</sup>H} NMR** (101 MHz, Chloroform-*d*) δ 166.1, 156.1, 141.6, 134.6, 131.6, 129.1, 128.6, 128.5, 128.2, 127.9, 127.4, 126.5, 126.3, 124.7, 124.5, 124.3, 123.8, 123.5, 119.5, 86.8, 83.7, 76.2, 61.2, 23.5, 14.3.

**HRMS** (ESI) Calculated for C<sub>29</sub>H<sub>24</sub>O<sub>3</sub>S ([M]<sup>+</sup>+Na<sup>+</sup>) = 475.1338, Found 475.1339.

**IR** (neat) 2980, 1621, 1600, 1571, 1508, 1444, 1416, 1394, 1367, 1344, 1306, 1275, 1226, 1154, 1084, 1023, 954, 855, 758, 693, 528 cm<sup>-1</sup>.

**Ethyl (E)-1-((4-ethoxy-4-oxobut-2-en-1-yl)oxy)-4-(3-phenylprop-2-yn-1-yl)-2-naphthoate (A34)**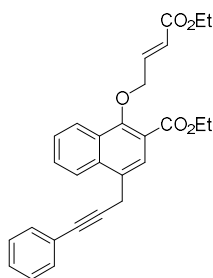

White solid, Mp: 116–119 °C, 58% yield.

**<sup>1</sup>H NMR** (400 MHz, Chloroform-*d*) δ 8.25 (dd, *J* = 8.4, 1.4 Hz, 1H), 8.14 – 8.09 (m, 2H), 7.68 (ddd, *J* = 8.4, 6.8, 1.4 Hz, 1H), 7.60 (ddd, *J* = 8.0, 6.8, 1.2 Hz, 1H), 7.47 – 7.42 (m, 2H), 7.32 – 7.26 (m, 3H), 7.22 (dt, *J* = 15.7, 4.2 Hz, 1H), 6.45 (dt, *J* = 15.7, 2.1 Hz, 1H), 4.83 (dd, *J* = 4.2, 2.1 Hz, 2H), 4.43 (q, *J* = 7.1 Hz, 2H), 4.26 (q, *J* = 7.1 Hz, 2H), 4.17 (s, 2H), 1.42 (t, *J* = 7.2 Hz, 3H), 1.33 (t, *J* = 7.1 Hz, 3H).

**<sup>13</sup>C{<sup>1</sup>H} NMR** (101 MHz, Chloroform-*d*) δ 166.3, 165.8, 155.5, 142.7, 134.6, 131.6, 129.0, 128.7, 128.7, 128.2, 127.9, 126.7, 126.4, 124.0, 123.9, 123.4, 121.7, 119.5, 86.6, 83.8, 73.8, 61.2, 60.5, 23.5, 14.3, 14.2.

**HRMS** (ESI) Calculated for C<sub>28</sub>H<sub>26</sub>O<sub>5</sub> ([M]<sup>+</sup>+Na<sup>+</sup>) = 465.1672, Found 465.1682

**IR** (neat) 2981, 1717, 1665, 1620, 1600, 1571, 1508, 1491, 1444, 1394, 1367, 1303, 1274, 1228, 1177, 1093, 1036, 759, 692, 528 cm<sup>-1</sup>.

**Ethyl (E)-1-(but-2-en-1-yloxy)-4-(3-phenylprop-2-yn-1-yl)-2-naphthoate (A35)**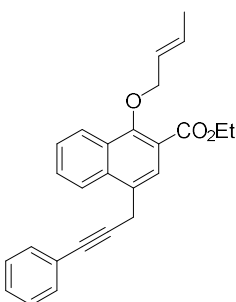

White solid, Mp: 65–68 °C, 17% yield.

**<sup>1</sup>H NMR** (400 MHz, Chloroform-*d*) δ 8.35 (dd, *J* = 8.4, 1.3 Hz, 1H), 8.14 – 8.05 (m, 2H), 7.67 (ddd, *J* = 8.4, 6.9, 1.4 Hz, 1H), 7.59 (ddd, *J* = 8.2, 6.8, 1.2 Hz, 1H), 7.48 – 7.41 (m, 2H), 7.33 – 7.26 (m, 3H), 6.02 – 5.79 (m, 2H), 4.63 – 4.55 (m, 2H), 4.45 (q, *J* = 7.1 Hz, 2H), 4.17 (s, 2H), 1.79 (d, *J* = 4.5 Hz, 3H), 1.45 (t, *J* = 7.1 Hz, 3H).

**<sup>13</sup>C{<sup>1</sup>H} NMR** (101 MHz, Chloroform-*d*) δ 166.2, 156.3, 134.5, 131.6, 130.9, 129.3, 128.5, 128.2, 127.9, 126.6, 126.5, 126.3, 124.6, 123.7, 123.5, 119.4, 86.8, 83.7, 76.8, 61.1, 23.4, 17.9, 14.3.

**HRMS** (ESI) Calculated for C<sub>26</sub>H<sub>24</sub>O<sub>3</sub> ([M]<sup>+</sup>+Na<sup>+</sup>) = 407.1618, Found 407.1616.

**IR** (neat) 2978, 1620, 1600, 1571, 1508, 1491, 1445, 1416, 1394, 1354, 1306, 1275, 1226, 1206, 1154, 1085, 1023, 965, 912, 758, 692, 528 cm<sup>-1</sup>.

**Ethyl (E)-1-(hex-2-en-1-yloxy)-4-(3-phenylprop-2-yn-1-yl)-2-naphthoate (A36)**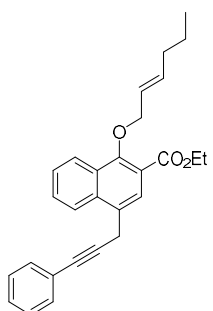

Colorless oil, Mp: 28–31 °C, 30% yield.

**<sup>1</sup>H NMR** (400 MHz, Chloroform-*d*) δ 8.36 (dd, *J* = 8.4, 1.3 Hz, 1H), 8.10 (d, *J* = 8.7 Hz, 2H), 7.67 (ddd, *J* = 8.3, 6.8, 1.4 Hz, 1H), 7.59 (ddd, *J* = 8.1, 6.8, 1.1 Hz, 1H), 7.48 – 7.41 (m, 2H), 7.29 (p, *J* = 3.5 Hz, 3H), 5.96 – 5.83 (m, 2H), 4.62 (d, *J* = 5.2 Hz, 2H), 4.46 (q, *J* = 7.1 Hz, 2H), 4.17 (s, 2H), 2.10 (dt, *J* = 7.9, 5.9 Hz, 2H), 1.44 (dt, *J* = 9.9, 7.2 Hz, 5H), 0.91 (t, *J* = 7.4 Hz, 3H).

**<sup>13</sup>C NMR** (101 MHz, Chloroform-*d*) δ 166.3, 156.3, 136.0, 134.5, 131.6, 129.3, 128.4, 128.2, 128.1, 127.8, 126.5, 126.2, 125.4, 124.7, 123.7, 123.5, 119.4, 86.8, 83.6, 77.0, 61.1, 34.4, 23.4, 22.1, 14.3, 13.6.

**HRMS** (ESI) Calculated for C<sub>28</sub>H<sub>28</sub>O<sub>3</sub> ([M]<sup>+</sup>+Na<sup>+</sup>) = 435.1931, Found 435.1933.8

**IR** (neat) 2959, 2929, 2871, 1722, 1621, 1600, 1571, 1507, 1491, 1457, 1416, 1394, 1357, 1306, 1275, 1225, 1154, 1083, 1023, 972, 692, 527 cm<sup>-1</sup>.

### Ethyl (E)-1-((3-cyclohexylallyl)oxy)-4-(3-phenylprop-2-yn-1-yl)-2-naphthoate (A37)

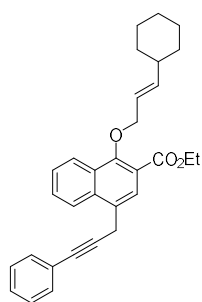

White solid, Mp: 59–62 °C, 25% yield.

$^1\text{H NMR}$  (600 MHz, Chloroform-*d*)  $\delta$  8.35 (d,  $J$  = 8.4 Hz, 1H), 8.10 (d,  $J$  = 8.4 Hz, 1H), 8.08 (s, 1H), 7.67 (ddd,  $J$  = 8.3, 6.7, 1.3 Hz, 1H), 7.59 (ddd,  $J$  = 8.1, 6.8, 1.0 Hz, 1H), 7.44 (dd,  $J$  = 6.7, 3.0 Hz, 2H), 7.31 – 7.27 (m, 3H), 5.85 – 5.76 (m, 2H), 4.60 (d,  $J$  = 5.9 Hz, 2H), 4.45 (q,  $J$  = 7.1 Hz, 2H), 4.17 (s, 2H), 2.03 (dtd,  $J$  = 11.1, 6.8, 3.0 Hz, 1H), 1.76 – 1.71 (m, 4H), 1.68 – 1.63 (m, 1H), 1.45 (t,  $J$  = 7.2 Hz, 3H), 1.27 (tt,  $J$  = 12.9, 3.5 Hz, 2H), 1.18 – 1.06 (m, 3H).

$^{13}\text{C}\{^1\text{H}\}$  NMR (151 MHz, Chloroform-*d*)  $\delta$  166.3, 156.3, 141.9, 134.5, 131.6, 129.4, 128.5, 128.2, 128.1, 127.9, 126.5, 126.2, 124.8, 123.7, 123.5, 122.7, 119.4, 86.9, 83.6, 77.2, 61.1, 40.3, 32.5, 26.1, 26.0, 23.5, 14.4.

HRMS (ESI) Calculated for  $\text{C}_{31}\text{H}_{32}\text{O}_3$  ( $[\text{M}] + \text{Na}^+$ ) = 475.2244, Found 475.2246.

IR (neat) 2923, 2850, 1721, 1620, 1600, 1571, 1508, 1490, 1447, 1416, 1394, 1368, 1351, 1306, 1275, 1225, 1153, 1083, 1024, 971, 692, 528  $\text{cm}^{-1}$ .

### Ethyl 4-((E)-3-(4-bromophenyl)allyl)-1-(cinnamyloxy)-2-naphthoate (A38)

White solid, Mp: 96–99 °C, 84% yield.

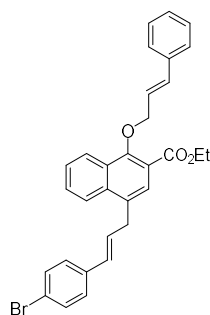

$^1\text{H NMR}$  (400 MHz, Chloroform-*d*)  $\delta$  8.38 (d,  $J$  = 8.1 Hz, 1H), 8.04 (d,  $J$  = 8.2 Hz, 1H), 7.78 (s, 1H), 7.60 (dddd,  $J$  = 20.2, 8.1, 6.8, 1.3 Hz, 2H), 7.45 (d,  $J$  = 7.3 Hz, 2H), 7.42 – 7.30 (m, 4H), 7.29 – 7.25 (m, 1H), 7.18 (d,  $J$  = 8.2 Hz, 2H), 6.81 (d,  $J$  = 15.9 Hz, 1H), 6.59 (dt,  $J$  = 15.9, 6.0 Hz, 1H), 6.48 (dt,  $J$  = 15.9, 6.1 Hz, 1H), 6.38 (d,  $J$  = 16.0 Hz, 1H), 4.82 (dd,  $J$  = 6.0, 1.4 Hz, 2H), 4.44 (q,  $J$  = 7.1 Hz, 2H), 3.95 (d,  $J$  = 6.1 Hz, 2H), 1.43 (t,  $J$  = 7.1 Hz, 3H).

$^{13}\text{C NMR}$  (101 MHz, Chloroform-*d*)  $\delta$  166.6, 155.8, 136.7, 136.4, 135.3, 133.3, 132.0, 131.7, 130.5, 129.5, 129.4, 128.8, 128.6, 128.1, 127.8, 127.2, 126.8, 126.5, 125.0, 124.7, 124.5, 121.0, 119.8, 76.7, 61.4, 36.3, 14.6.

HRMS (ESI) Calculated for  $\text{C}_{31}\text{H}_{27}^{79}\text{BrO}_3$  ( $[\text{M}] + \text{Na}^+$ ) = 549.1036, Found 549.1047.

HRMS (ESI) Calculated for  $\text{C}_{31}\text{H}_{27}^{81}\text{BrO}_3$  ( $[\text{M}] + \text{Na}^+$ ) = 551.1015, Found 551.1022.

IR (neat) 3026, 2980, 2361, 1619, 1571, 1487, 1449, 1395, 1356, 1276, 1228, 1206, 1154, 1079, 1011, 965, 833, 765, 693, 498  $\text{cm}^{-1}$ .

### Ethyl 1-(((E)-3-(4-bromophenyl)allyl)oxy)-4-cinnamyl-2-naphthoate (*ent*-A38)

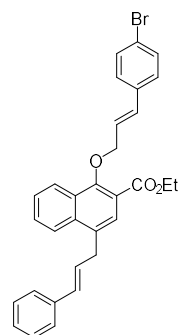

White solid, Mp: 110–113 °C, 76% yield.

$^1\text{H NMR}$  (400 MHz, Chloroform-*d*)  $\delta$  8.35 (d,  $J$  = 8.1 Hz, 1H), 8.05 (d,  $J$  = 8.2 Hz, 1H), 7.80 (s, 1H), 7.57 (dddd,  $J$  = 19.4, 8.0, 6.8, 1.4 Hz, 2H), 7.47 – 7.41 (m, 2H), 7.32 – 7.22 (m, 6H), 7.19 – 7.14 (m, 1H), 6.74 (d,  $J$  = 15.9 Hz, 1H), 6.57 (dt,  $J$  = 15.9, 5.9 Hz, 1H), 6.45 (d,  $J$  = 2.6 Hz, 2H), 4.80 (dd,  $J$  = 5.8, 1.4 Hz, 2H), 4.42 (q,  $J$  = 7.1 Hz, 2H), 4.02 – 3.87 (m, 2H), 1.41 (t,  $J$  = 7.1 Hz, 3H).

$^{13}\text{C NMR}$  (101 MHz, Chloroform-*d*)  $\delta$  166.4, 155.6, 137.4, 135.6, 135.3, 132.4, 131.8, 131.8, 131.6, 129.3, 128.6, 128.5, 128.2, 127.3, 127.0, 126.4, 126.2, 125.8, 124.5, 124.4, 121.8, 119.7, 76.3, 61.3, 36.3, 14.5.

HRMS (ESI) Calculated for  $\text{C}_{31}\text{H}_{27}^{79}\text{BrO}_3$  ( $[\text{M}] + \text{Na}^+$ ) = 549.1036, Found 549.1047.

HRMS (ESI) Calculated for  $\text{C}_{31}\text{H}_{27}^{81}\text{BrO}_3$  ( $[\text{M}] + \text{Na}^+$ ) = 551.1015, Found 551.1024.

**IR** (neat) 3026, 2980, 1619, 1599, 1571, 1487, 1448, 1417, 1393, 1357, 1277, 1227, 1207, 1152, 1073, 1009, 966, 847, 767, 741, 693, 498 cm<sup>-1</sup>.

**Ethyl 1-(cinnamyloxy)-4-((E)-3-(naphthalen-1-yl)allyl)-2-naphthoate (A39)**

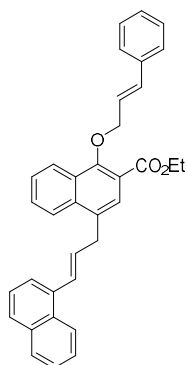

White solid, Mp: 74–77 °C, 71% yield.

**<sup>1</sup>H NMR** (400 MHz, Chloroform-*d*) δ 8.61 (d, *J* = 8.3 Hz, 1H), 8.35 (d, *J* = 8.3 Hz, 1H), 8.26 – 8.15 (m, 1H), 8.10 (s, 1H), 8.04 – 7.98 (m, 1H), 7.92 (d, *J* = 8.1 Hz, 1H), 7.79 (ddd, *J* = 26.9, 13.3, 7.1 Hz, 3H), 7.65 (d, *J* = 7.6 Hz, 4H), 7.60 – 7.51 (m, 3H), 7.46 (t, *J* = 7.7 Hz, 1H), 7.41 (d, *J* = 15.7 Hz, 1H), 7.02 (d, *J* = 15.9 Hz, 1H), 6.81 (dt, *J* = 15.4, 5.8 Hz, 1H), 6.74 – 6.63 (dt, 1H), 5.04 (d, *J* = 6.1 Hz, 2H), 4.65 (q, *J* = 7.1 Hz, 2H), 4.28 (d, *J* = 6.4 Hz, 2H), 1.63 (t, *J* = 7.2 Hz, 3H).

**<sup>13</sup>C NMR** (101 MHz, Chloroform-*d*) δ 166.4 , 155.6 , 136.5 , 135.2 , 135.1 , 133.5 , 133.0 , 132.1 , 131.6 , 131.0 , 129.2 , 128.9 , 128.5 , 128.4 , 128.3 , 127.8 , 127.5 , 126.9 , 126.6 , 126.3 , 125.8 , 125.6 , 125.5 , 124.8 , 124.4 , 124.4 , 123.8 , 123.7 , 119.6 , 76.5 , 61.2 , 36.5 , 14.3 .

**HRMS** (ESI) Calculated for C<sub>35</sub>H<sub>30</sub>O<sub>3</sub> ([M]<sup>+</sup>+Na<sup>+</sup>) = 521.2087, Found 521.2094.

**IR** (neat) 3058, 2980, 1619, 1598, 1572, 1507, 1448, 1516, 1393, 1356, 1276, 1226, 1206, 1153, 1083, 1022, 965, 863, 768, 692, 561, 496, 424cm<sup>-1</sup>.

**Ethyl 4-cinnamyl-1-((E)-3-(naphthalen-1-yl)allyloxy)-2-naphthoate (ent-A39)**

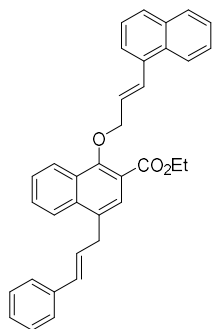

White solid, Mp: 98–101 °C, 77% yield.

**<sup>1</sup>H NMR** (400 MHz, Chloroform-*d*) δ 8.51 – 8.37 (m, 1H), 8.09 (dd, *J* = 8.8, 4.3 Hz, 2H), 7.91 – 7.77 (m, 3H), 7.67 – 7.44 (m, 7H), 7.36 – 7.30 (m, 2H), 7.29 – 7.25 (m, 2H), 7.23 – 7.14 (m, 1H), 6.61 (dt, *J* = 15.5, 6.0 Hz, 1H), 6.48 (d, *J* = 2.0 Hz, 2H), 4.95 (dd, *J* = 6.1, 1.5 Hz, 2H), 4.46 (qd, *J* = 7.1, 1.5 Hz, 2H), 3.98 (d, *J* = 4.1 Hz, 2H), 1.44 (t, *J* = 7.1 Hz, 3H).

**<sup>13</sup>C NMR** (101 MHz, Chloroform-*d*) δ 166.7 , 155.7 , 137.4 , 135.3 , 134.4 , 133.7 , 132.3 , 131.6 , 131.3 , 130.6 , 129.5 , 128.7 , 128.6 , 128.6 , 128.5 , 128.3 , 128.2 , 127.3 , 127.1 , 126.4 , 126.3 , 126.2 , 126.0 , 125.8 , 124.7 , 124.6 , 124.2 , 123.9 , 119.8 , 76.8 , 61.4 , 36.4 , 14.6 .

**HRMS** (ESI) Calculated for C<sub>35</sub>H<sub>30</sub>O<sub>3</sub> ([M]<sup>+</sup>+Na<sup>+</sup>) = 521.2087, Found 521.2092.

**IR** (neat) 3057, 2980, 1619, 1597, 1571, 1505, 1448, 1416, 1392, 1360, 1277, 1228, 1205, 1154, 1084, 1021, 964, 866, 769, 738, 693, 493, 426 cm<sup>-1</sup>.

**Ethyl 4-((E)-but-2-en-1-yl)-1-(cinnamyloxy)-2-naphthoate (A40)**

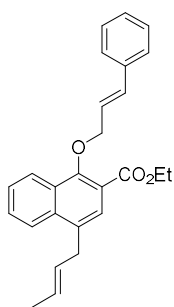

White solid, Mp: 40–43 °C, 75% yield.

**<sup>1</sup>H NMR** (400 MHz, Chloroform-*d*) δ 8.35 (dd, *J* = 7.8, 1.4 Hz, 1H), 8.07 – 8.00 (m, 1H), 7.73 (s, 1H), 7.64 – 7.54 (m, 2H), 7.47 – 7.43 (m, 2H), 7.37 – 7.31 (m, 2H), 7.29 – 7.24 (m, 1H), 6.85 – 6.77 (m, 1H), 6.59 (dt, *J* = 15.9, 6.0 Hz, 1H), 5.82 – 5.65 (m, 1H), 5.66 – 5.50 (m, 1H), 4.80 (dd, *J* = 6.0, 1.4 Hz, 2H), 4.44 (q, *J* = 7.1 Hz, 2H), 3.74 (dq, *J* = 6.3, 1.3 Hz, 2H), 1.68 (dt, *J* = 6.4, 1.5 Hz, 3H), 1.43 (t, *J* = 7.1 Hz, 3H).

**<sup>13</sup>C NMR** (101 MHz, Chloroform-*d*) δ 166.7 , 155.5 , 136.7 , 135.3 , 133.2 ,

133.1 , 129.3 , 129.2 , 128.7 , 128.3 , 128.0 , 127.2 , 126.8 , 126.6 , 126.3 , 125.1 , 124.6 , 124.5 , 119.7 , 76.6 , 61.3 , 36.0 , 18.1 , 14.5 .

**HRMS** (ESI) Calculated for  $C_{26}H_{26}O_3$  ( $[M]+Na^+$ ) = 409.1774, Found 409.1775.

**IR** (neat) 2978, 2361, 1720, 1619, 1571, 1500, 1448, 1416, 1393, 1358, 1276, 1228, 1205, 1154, 1083, 1023, 965, 766, 693  $cm^{-1}$ .

#### Ethyl 1-(((E)-but-2-en-1-yl)oxy)-4-cinnamyl-2-naphthoate (*ent*-A40)

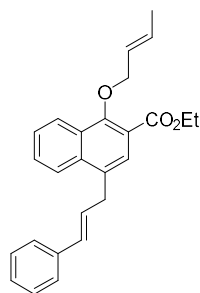

White solid, Mp: 72–75 °C, 74% yield.

**$^1H$  NMR** (400 MHz, Chloroform-*d*)  $\delta$  8.33 (dd,  $J$  = 8.3, 1.6 Hz, 1H), 8.06 (dd,  $J$  = 8.0, 1.3 Hz, 1H), 7.77 (s, 1H), 7.58 (dddd,  $J$  = 20.8, 8.2, 6.8, 1.4 Hz, 2H), 7.33 (dt,  $J$  = 6.4, 1.4 Hz, 2H), 7.27 (d,  $J$  = 4.2 Hz, 2H), 7.23 – 7.15 (m, 1H), 6.48 (d,  $J$  = 3.5 Hz, 2H), 6.05 – 5.74 (m, 2H), 4.58 (d,  $J$  = 3.3 Hz, 2H), 4.44 (q,  $J$  = 7.1 Hz, 2H), 3.96 (d,  $J$  = 3.8 Hz, 2H), 1.79 (d,  $J$  = 4.3 Hz, 3H), 1.44 (t,  $J$  = 7.1 Hz, 3H).

**$^{13}C$  NMR** (101 MHz, Chloroform-*d*)  $\delta$  166.7 , 155.8 , 137.5 , 135.3 , 132.0 , 131.6 , 131.0 , 129.4 , 128.7 , 128.6 , 128.4 , 127.3 , 127.1 , 126.8 , 126.3 , 124.7 , 124.5 , 119.7 , 76.9 , 61.3 , 36.4 , 18.1 , 14.5 .

**HRMS** (ESI) Calculated for  $C_{26}H_{26}O_3$  ( $[M]+Na^+$ ) = 409.1774, Found 409.1773.

**IR** (neat) 3025, 2978, 2361, 1619, 1600, 1571, 1500, 1448, 1416, 1393, 1356, 1277, 1228, 1205, 1154, 1085, 1024, 965, 767, 738, 693, 493  $cm^{-1}$ .

#### 1-chloro-4-(cinnamyloxy)naphthalene (A41)

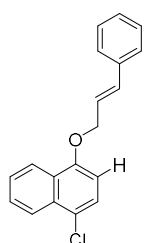

Colorless oil, 91% yield.

**$^1H$  NMR** (400 MHz, Chloroform-*d*)  $\delta$  8.17 (d,  $J$  = 8.8 Hz, 1H), 7.80 (d,  $J$  = 7.8 Hz, 1H), 7.56 – 7.45 (m, 3H), 7.44 – 7.41 (m, 2H), 7.34 – 7.30 (m, 3H), 7.28 – 7.23 (m, 1H), 6.78 (d,  $J$  = 15.7 Hz, 1H), 6.58 (dt,  $J$  = 15.9, 6.2 Hz, 1H), 4.80 (dd,  $J$  = 6.2, 1.4 Hz, 2H).

**$^{13}C$  NMR** (101 MHz, Chloroform-*d*)  $\delta$  150.6 , 136.4 , 133.5 , 133.4 , 129.3 , 128.6 , 127.9 , 127.5 , 126.7 , 126.6 , 126.4 , 124.9 , 124.5 , 122.1 , 74.6 .

**HRMS** (ESI) Calculated for  $C_{19}H_{15}ClO$  ( $[M]+Na^+$ ) = 317.0704, Found 317.0706.

#### 4-benzyl-1-(cinnamyloxy)-2-naphthonitrile (A43)

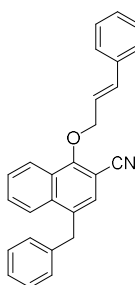

Colorless oil, 64% yield.

**$^1H$  NMR** (600 MHz, Chloroform-*d*)  $\delta$  8.32 (d,  $J$  = 7.4 Hz, 1H), 7.99 (d,  $J$  = 7.9 Hz, 1H), 7.62 – 7.56 (m, 2H), 7.43 (m, 2H), 7.33 (m, 2H), 7.31 – 7.25 (m, 3H), 7.25 – 7.20 (m, 2H), 7.17 (d,  $J$  = 6.9 Hz, 2H), 6.76 (d,  $J$  = 15.8 Hz, 1H), 6.61 – 6.53 (m, 1H), 5.09 (d,  $J$  = 6.4 Hz, 2H), 4.36 (s, 2H).

**$^{13}C$  NMR** (151 MHz, Chloroform-*d*)  $\delta$  159.0 , 139.2 , 136.1 , 135.1 , 134.7 , 133.3 , 129.4 , 128.7 , 128.6 , 128.2 , 128.0 , 127.5 , 126.9 , 126.8 , 126.5 , 124.7 , 123.7 , 123.6 , 117.8 , 99.6 , 76.2 , 38.4 .

**HRMS** (ESI) Calculated for  $C_{27}H_{21}NO$  ( $[M]+Na^+$ ) = 398.1515, Found 398.1507.

#### 4-chloro-1-(cinnamyloxy)-2-naphthaldehyde (A44)

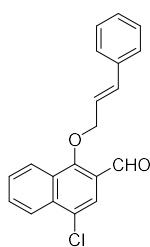

**<sup>1</sup>H NMR** (600 MHz, Chloroform-*d*) δ 10.56 (s, 1H), 8.32 (dd, *J* = 12.8, 8.4 Hz, 2H), 7.96 (s, 1H), 7.78 (t, *J* = 7.7 Hz, 1H), 7.70 – 7.67 (m, 1H), 7.42 (d, *J* = 7.6 Hz, 2H), 7.36 (t, *J* = 7.5 Hz, 2H), 7.30 (t, *J* = 7.5 Hz, 1H), 6.76 (d, *J* = 15.9 Hz, 1H), 6.54 – 6.49 (m, 1H), 4.88 (d, *J* = 6.1 Hz, 2H).

**<sup>13</sup>C NMR** (151 MHz, Chloroform-*d*) δ 188.51, 159.71, 135.81, 135.06, 134.91, 130.41, 129.36, 128.72, 128.68, 128.42, 127.64, 126.74, 125.49, 125.42, 123.88, 122.90, 122.47, 79.02.

**HRMS** (ESI) Calculated for C<sub>20</sub>H<sub>15</sub>ClO<sub>2</sub> ([M]<sup>+</sup>Na<sup>+</sup>) = 345.0653, Found 345.0658.

**IR** (neat) 3027, 2886, 1678, 1618, 1587, 1496, 1449, 1411, 1349, 1259, 1218, 1185, 1095, 1030, 963, 921, 836, 746, 685, 615, 510 cm<sup>-1</sup>.

#### 1-(1-(cinnamyloxy)-4-(3-phenylprop-2-yn-1-yl)naphthalen-2-yl)ethan-1-one (A45)

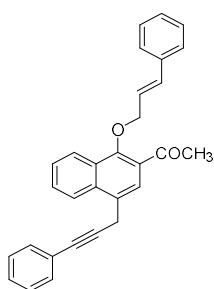

Yellow solid, Mp: 107–110 °C, 28% yield.

**<sup>1</sup>H NMR** (400 MHz, Chloroform-*d*) δ 8.34 (dd, *J* = 8.1, 1.6 Hz, 1H), 8.15 (d, *J* = 8.3 Hz, 1H), 7.93 (d, *J* = 4.1 Hz, 1H), 7.69 (ddd, *J* = 8.3, 6.8, 1.4 Hz, 1H), 7.62 (ddd, *J* = 8.2, 6.8, 1.3 Hz, 1H), 7.45 (h, *J* = 2.1 Hz, 4H), 7.40 – 7.34 (m, 2H), 7.30 (td, *J* = 5.2, 2.1 Hz, 4H), 6.82 (d, *J* = 15.8 Hz, 1H), 6.53 (dt, *J* = 15.8, 6.0 Hz, 1H), 4.74 (dd, *J* = 6.1, 1.4 Hz, 2H), 4.18 (s, 2H), 2.81 (s, 3H).

**<sup>13</sup>C{<sup>1</sup>H} NMR** (101 MHz, Chloroform-*d*) δ 200.4, 155.2, 136.2, 134.7, 133.6, 131.6, 129.1, 128.7, 128.7, 128.6, 128.2, 128.1, 128.1, 127.9, 126.7, 126.6, 125.3, 124.2, 124.1, 124.0, 123.4, 86.7, 83.7, 77.3, 31.0, 23.5.

**HRMS** (ESI) Calculated for C<sub>30</sub>H<sub>24</sub>O<sub>2</sub> ([M]<sup>+</sup>Na<sup>+</sup>) = 439.1669, Found 439.1669.

**IR** (neat) 3057, 1670, 1619, 1599, 1570, 1491, 1446, 1412, 1386, 1360, 1305, 1272, 1225, 1186, 1153, 1070, 1025, 965, 611, 529, 504, 433 cm<sup>-1</sup>.

## 15. Spectral Characterization Data for the Products

### Ethyl (R)-4-cinnamyl-1-oxo-4-(3-phenylprop-2-yn-1-yl)-1,4-dihydronaphthalene-2-carboxylate (B1)

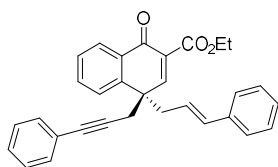

White solid, Mp: 82–85 °C, 88% yield, 91% *ee*;  $[\alpha]^{12.6} = -28.2$  ( $c = 1.79$  in  $\text{CH}_2\text{Cl}_2$ ,  $\lambda = 589$  nm).

**HPLC:** Daicel chiralcel ODH, *n*-hexane/*i*-PrOH = 80/20, 1.0 mL/min,  $\lambda = 224$  nm,  $t_{R(\text{minor})} = 12.68$  min,  $t_{R(\text{major})} = 21.40$  min.

**$^1\text{H}$  NMR** (400 MHz, Acetone- $d_6$ )  $\delta$  8.12 (dd,  $J = 7.9, 1.5$  Hz, 1H), 7.93 (d,  $J = 8.1$  Hz, 1H), 7.78 (s, 1H), 7.74 (ddd,  $J = 8.1, 7.3, 1.5$  Hz, 1H), 7.51 – 7.46 (m, 1H), 7.28 – 7.14 (m, 10H), 6.45 – 6.39 (m, 1H), 5.89 – 5.81 (m, 1H), 4.27 (q,  $J = 7.1$  Hz, 2H), 3.28 (s, 2H), 3.26 – 3.20 (m, 1H), 3.13 (ddd,  $J = 14.0, 7.5, 1.3$  Hz, 1H), 1.28 (t,  $J = 7.1$  Hz, 3H).

**$^{13}\text{C}\{^1\text{H}\}$  NMR** (101 MHz, Acetone- $d_6$ )  $\delta$  181.2, 165.6, 157.2, 145.7, 137.9, 134.99, 135.2, 135.0, 134.0, 134.0, 133.9, 132.2, 129.4, 129.3, 129.0, 128.4, 128.3, 127.5, 127.3, 127.0, 124.9, 124.1, 86.2, 84.7, 61.7, 46.7, 44.1, 32.8, 14.6.

**HRMS** (ESI) Calculated for  $\text{C}_{31}\text{H}_{26}\text{O}_3$  ( $[\text{M}] + \text{Na}^+$ ) = 469.1774, Found 469.1786.

**IR** (neat) 3028, 2982, 1733, 1662, 1600, 1490, 1451, 1378, 1275, 1231, 1161, 1138, 1086, 1019, 967, 928, 862, 756, 692, 618, 527  $\text{cm}^{-1}$ .

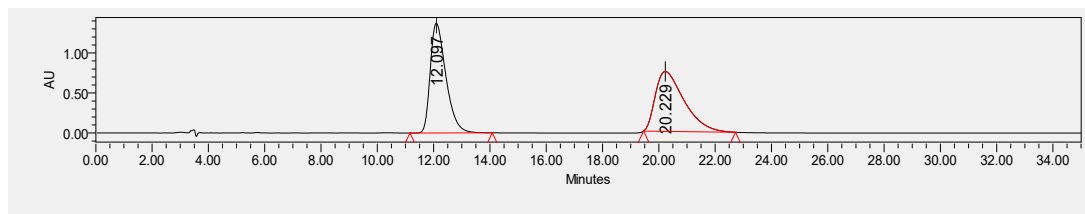

|   | Retention Time | Area     | % Area |
|---|----------------|----------|--------|
| 1 | 12.097         | 53013334 | 49.95  |
| 2 | 20.229         | 53112670 | 50.05  |

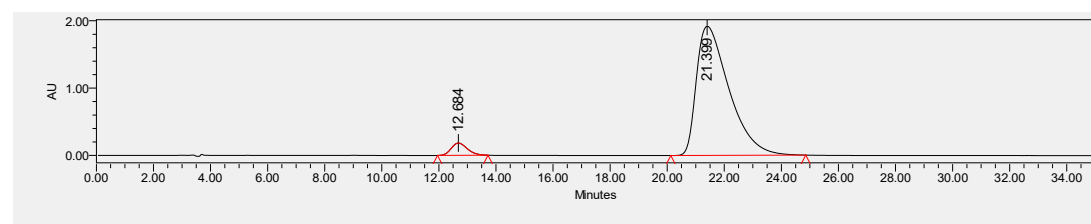

|   | Retention Time | Area      | % Area |
|---|----------------|-----------|--------|
| 1 | 12.684         | 7172585   | 4.50   |
| 2 | 21.389         | 152140239 | 95.50  |

**Methyl (R)-4-cinnamyl-1-oxo-4-(3-phenylprop-2-yn-1-yl)-1,4-dihydronaphthalene-2-carboxylate (B2)**

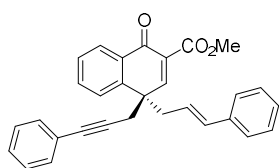

Colorless oil, 72% yield, 81% *ee*;  $[\alpha]^{12.3} = -24.3$  ( $c = 0.59$  in  $\text{CH}_2\text{Cl}_2$ ,  $\lambda = 589$  nm).

**HPLC:** Daicel chiralcel ODH, *n*-hexane/*i*-PrOH = 80/20, 1.0 mL/min,  $\lambda = 224$  nm,  $t_{\text{R(minor)}} = 15.27$  min,  $t_{\text{R(major)}} = 24.53$  min.

**$^1\text{H}$  NMR** (400 MHz, Acetone- $d_6$ )  $\delta$  8.19 – 8.06 (m, 1H), 7.93 (d,  $J = 7.9$  Hz, 1H), 7.81 (s, 1H), 7.77 – 7.72 (m, 1H), 7.51 – 7.47 (m, 1H), 7.28 – 7.13 (m, 10H), 6.42 (d,  $J = 15.7$  Hz, 1H), 5.89 – 5.81 (m, 1H), 3.79 (s, 3H), 3.28 (s, 2H), 3.26 – 3.11 (m, 2H).

**$^{13}\text{C}\{^1\text{H}\}$  NMR** (101 MHz, Acetone- $d_6$ )  $\delta$  181.2, 166.0, 157.7, 145.6, 137.9, 135.0, 134.8, 134.1, 133.9, 132.2, 129.4, 129.3, 129.0, 128.4, 128.3, 127.5, 127.3, 127.0, 124.9, 124.0, 86.2, 84.7, 52.5, 46.8, 44.1, 32.8

**HRMS** (ESI) Calculated for  $\text{C}_{30}\text{H}_{24}\text{O}_3$  ( $[\text{M}] + \text{Na}^+$ ) = 455.1618, Found 455.1621.

**IR** (neat) 3028, 2950, 1738, 1663, 1600, 1491, 1437, 1380, 1279, 1234, 1188, 1161, 1137, 1086, 984, 873, 693, 619, 528  $\text{cm}^{-1}$ .

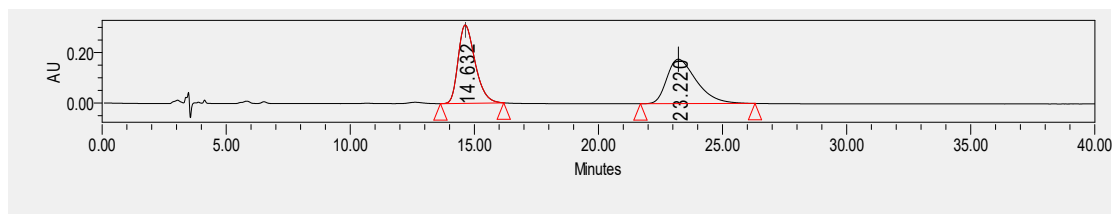

|   | Retention Time | Area     | % Area |
|---|----------------|----------|--------|
| 1 | 14.632         | 14721219 | 50.21  |
| 2 | 23.220         | 14597445 | 49.79  |

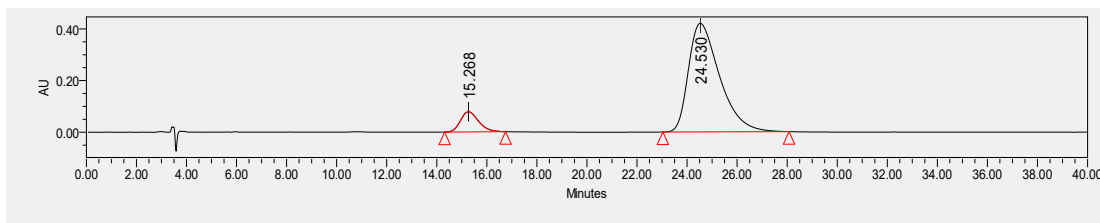

|   | Retention Time | Area     | % Area |
|---|----------------|----------|--------|
| 1 | 15.268         | 3929691  | 9.75   |
| 2 | 24.530         | 36354578 | 90.25  |



**Isopropyl (R)-4-cinnamyl-1-oxo-4-(3-phenylprop-2-yn-1-yl)-1,4-dihydronaphthalene-2-carboxylate (B3)**

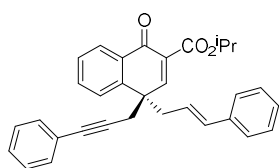

White solid, Mp: 50–53 °C, 78% yield, 97% *ee*;  $[\alpha]^{25}_D = -30.7$  ( $c = 0.68$  in  $\text{CH}_2\text{Cl}_2$ ,  $\lambda = 589$  nm).

**HPLC:** Daicel chiralcel ODH, *n*-hexane/*i*-PrOH = 80/20, 1.0 mL/min,  $\lambda = 224$  nm,  $t_{R(\text{minor})} = 9.95$  min,  $t_{R(\text{major})} = 16.44$  min.

**$^1\text{H}$  NMR** (400 MHz, Acetone- $d_6$ )  $\delta$  8.11 (dd,  $J = 7.9, 1.5$  Hz, 1H), 7.93 (d,  $J = 7.4$  Hz, 1H), 7.76 – 7.72 (m, 2H), 7.51 – 7.46 (m, 1H), 7.28 – 7.15 (m, 10H), 6.42 (d,  $J = 15.8$  Hz, 1H), 5.89 – 5.81 (m, 1H), 5.14 (hept,  $J = 6.2$  Hz, 1H), 3.28 (s, 2H), 3.24 – 3.10 (m, 2H), 1.29 (dd,  $J = 6.3, 2.6$  Hz, 6H).

**$^{13}\text{C}\{^1\text{H}\}$  NMR** (101 MHz, Acetone- $d_6$ )  $\delta$  181.3, 165.3, 156.6, 145.7, 138.0, 135.6, 135.0, 134.0, 133.9, 132.3, 129.4, 129.3, 129.0, 128.4, 128.3, 127.5, 127.3, 127.0, 124.9, 124.1, 86.3, 84.7, 69.3, 46.7, 44.1, 32.8, 22.1.

**HRMS** (ESI) Calculated for  $\text{C}_{32}\text{H}_{28}\text{O}_3$  ( $[\text{M}] + \text{Na}^+$ ) = 483.1931, Found 483.1935.

**IR** (neat) 3028, 2981, 2934, 1730, 1663, 1600, 1491, 1452, 1378, 1277, 1234, 1181, 1142, 1105, 1085, 1027, 966, 942, 836, 692, 618, 527  $\text{cm}^{-1}$ .

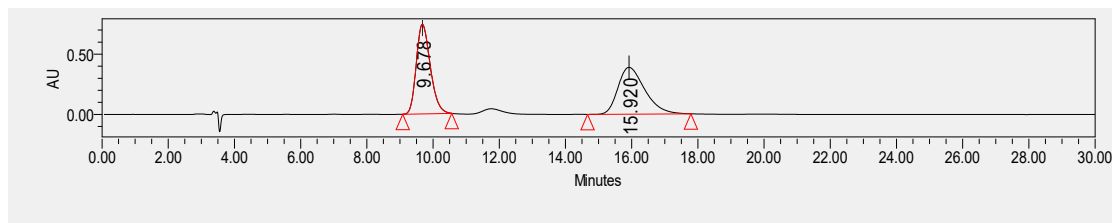

|   | Retention Time | Area     | % Area |
|---|----------------|----------|--------|
| 1 | 9.678          | 21878327 | 49.97  |
| 2 | 15.920         | 21904318 | 50.03  |

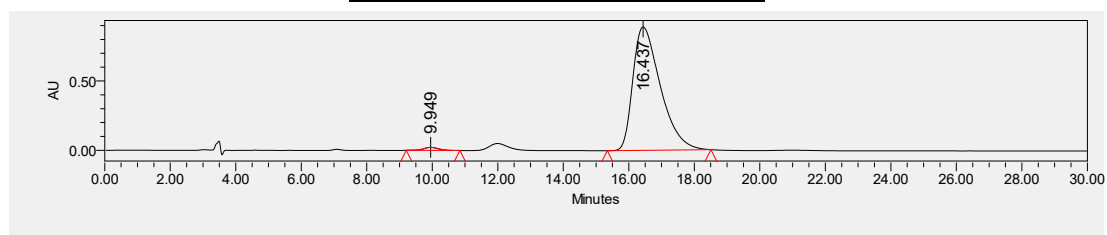

|   | Retention Time | Area     | % Area |
|---|----------------|----------|--------|
| 1 | 9.949          | 697318   | 1.32   |
| 2 | 16.437         | 51941290 | 98.68  |

**Phenyl (R)-4-cinnamyl-1-oxo-4-(3-phenylprop-2-yn-1-yl)-1,4-dihydronaphthalene-2-carboxylate (B4)**

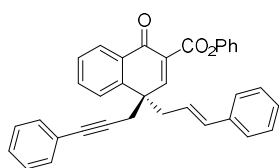

White solid, Mp: 46–49 °C, 87% yield, 97% *ee*;  $[\alpha]^{13.0} = -43.0$  ( $c = 0.83$  in  $\text{CH}_2\text{Cl}_2$ ,  $\lambda = 589$  nm).

**HPLC:** Daicel chiralcel ODH, *n*-hexane/*i*-PrOH = 80/20, 1.0 mL/min,  $\lambda = 224$  nm,  $t_{R(\text{minor})} = 25.41$  min,  $t_{R(\text{major})} = 45.28$  min.

**$^1\text{H}$  NMR** (400 MHz, Acetone- $d_6$ )  $\delta$  8.17 (dd,  $J = 7.9, 1.5$  Hz, 1H), 8.10 (s, 1H), 7.97 (d,  $J = 7.8$  Hz, 1H), 7.80 – 7.75 (m, 1H), 7.51 (ddd,  $J = 8.1, 7.3, 1.1$  Hz, 1H), 7.44 (ddd,  $J = 7.6, 6.4, 2.0$  Hz, 2H), 7.30 – 7.13 (m, 13H), 6.47 (d,  $J = 15.8$  Hz, 1H), 5.92 (dt,  $J = 15.4, 7.5$  Hz, 1H), 3.34 (s, 2H), 3.31 – 3.17 (m, 2H).

**$^{13}\text{C}\{^1\text{H}\}$  NMR** (101 MHz, Acetone- $d_6$ )  $\delta$  181.1, 164.0, 159.1, 152.0, 145.6, 137.9, 135.1, 134.2, 134.2, 133.8, 132.2, 130.4, 129.4, 129.3, 129.0, 128.5, 128.3, 127.5, 127.0, 127.0, 126.9, 124.8, 124.0, 122.7, 86.2, 84.8, 47.1, 44.1, 32.8.

**HRMS** (ESI) Calculated for  $\text{C}_{35}\text{H}_{26}\text{O}_3$  ( $[\text{M}]+\text{Na}^+$ ) = 517.1774, Found 517.1777.

**IR** (neat) 3028, 1752, 1665, 1598, 1490, 1454, 1379, 1267, 1215, 1189, 1161, 1129, 1072, 1025, 966, 928, 897, 838, 754, 691, 528, 499  $\text{cm}^{-1}$ .

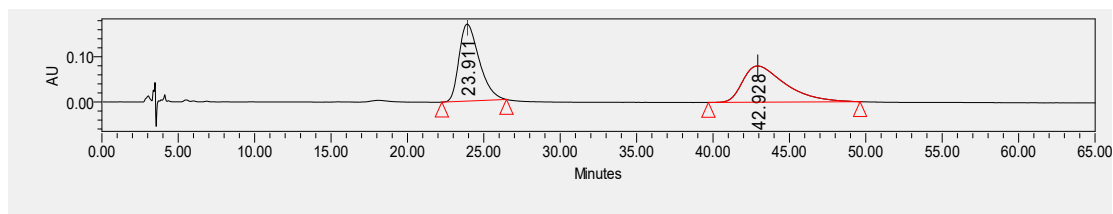

|   | Retention Time | Area     | % Area |
|---|----------------|----------|--------|
| 1 | 23.911         | 15641370 | 50.14  |
| 2 | 42.928         | 15553890 | 49.86  |

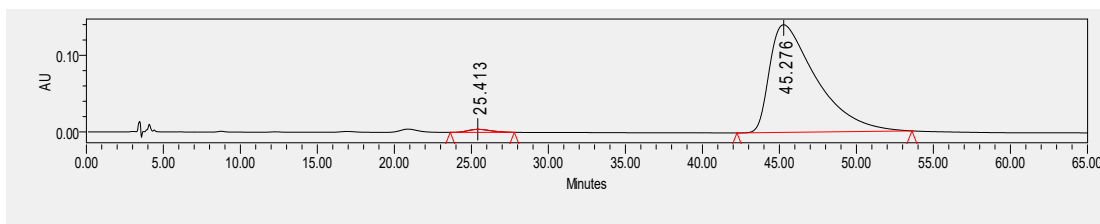

|   | Retention Time | Area     | % Area |
|---|----------------|----------|--------|
| 1 | 25.413         | 410151   | 1.36   |
| 2 | 45.276         | 29657342 | 98.64  |

### Ethyl (R)-4-cinnamyl-1-oxo-4-(prop-2-yn-1-yl)-1,4-dihydronaphthalene-2-carboxylate (B5)

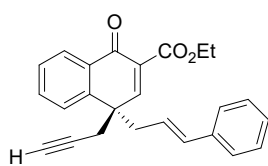

Colorless oil, 86% yield, 93% *ee*;  $[\alpha]^{19.5} = 51.2$  ( $c = 0.52$  in  $\text{CH}_2\text{Cl}_2$ ,  $\lambda = 589$  nm).

**HPLC:** Daicel chiralcel ODH, *n*-hexane/*i*-PrOH = 80/20, 1.0 mL/min,  $\lambda = 224$  nm,  $t_{R(\text{minor})} = 9.59$  min,  $t_{R(\text{major})} = 11.45$  min.

**$^1\text{H NMR}$**  (400 MHz, Acetone- $d_6$ )  $\delta$  8.11 – 8.09 (m, 1H), 7.89 – 7.87 (m, 1H), 7.74 (d,  $J = 3.2$  Hz, 2H), 7.51 – 7.48 (m, 1H), 7.23 – 7.19 (m, 2H), 7.16 – 7.14 (m, 3H), 6.36 (d,  $J = 15.8$  Hz, 1H), 5.80 – 5.75 (m, 1H), 4.28 (d,  $J = 7.1$  Hz, 2H), 3.11 – 3.08 (m, 4H), 2.37 (t,  $J = 2.6$  Hz, 1H), 1.30 (s, 3H).

**$^{13}\text{C NMR}$**  (101 MHz, Acetone- $d_6$ )  $\delta$  206.3, 181.1, 165.5, 157.1, 145.4, 137.9, 135.1, 134.9, 134.0, 133.8, 129.4, 128.4, 128.3, 127.4, 127.4, 127.0, 124.6, 80.3, 73.3, 61.7, 46.1, 44.4, 31.3, 14.6.

**HRMS** (ESI) Calculated for  $\text{C}_{25}\text{H}_{22}\text{O}_3$  ( $[\text{M}] + \text{Na}^+$ ) = 393.1461, Found 393.1463.

**IR** (neat) 3293, 3028, 2982, 1735, 1664, 1601, 1453, 1380, 1276, 1233, 1162, 1139, 1087, 1019, 967, 929, 862, 752, 647, 514  $\text{cm}^{-1}$

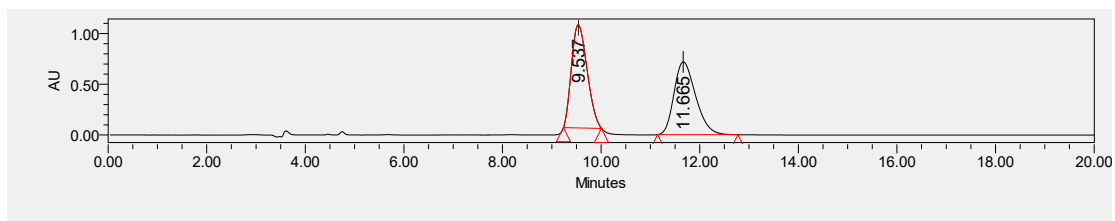

|   | Retention Time | Area     | % Area |
|---|----------------|----------|--------|
| 1 | 9.537          | 22387892 | 50.61  |
| 2 | 11.665         | 21850927 | 49.39  |

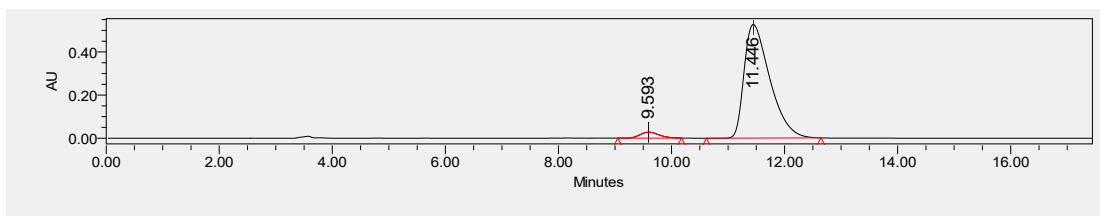

|   | Retention Time | Area     | % Area |
|---|----------------|----------|--------|
| 1 | 9.593          | 647641   | 3.74   |
| 2 | 11.446         | 16671273 | 96.26  |

### Ethyl (R)-4-cinnamyl-4-(ethoxymethyl)-1-oxo-1,4-dihydronaphthalene-2-carboxylate (B6)

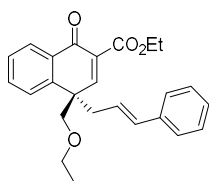

Colorless oil, 42% yield, 93% *ee*;  $[\alpha]^{13.5} = 69.8$  ( $c = 0.32$  in  $\text{CH}_2\text{Cl}_2$ ,  $\lambda = 589$  nm).

**HPLC:** Daicel chiralcel ODH, *n*-hexane/*i*-PrOH = 90/10, 1.0 mL/min,  $\lambda = 224$  nm,  $t_{\text{R}(\text{minor})} = 9.90$  min,  $t_{\text{R}(\text{major})} = 11.34$  min.

**$^1\text{H}$  NMR** (400 MHz, Acetone- $d_6$ )  $\delta$  8.09 (dd,  $J = 7.9, 1.5$  Hz, 1H), 7.86 (d,  $J = 7.8$  Hz, 1H), 7.76 (s, 1H), 7.71 (ddd,  $J = 7.9, 7.2, 1.5$  Hz, 1H), 7.48 (ddd,  $J = 8.2, 7.3, 1.2$  Hz, 1H), 7.21 – 7.12 (m, 5H), 6.34 (d,  $J = 15.7$  Hz, 1H), 5.75 (dd,  $J = 15.6, 7.6$  Hz, 1H), 4.25 (t,  $J = 7.1$  Hz, 2H), 3.98 – 3.87 (m, 2H), 3.48 – 3.38 (m, 2H), 3.02 (ddd,  $J = 7.6, 2.9, 1.3$  Hz, 2H), 1.29 (t,  $J = 7.1$  Hz, 3H), 1.04 (t,  $J = 7.0$  Hz, 3H)

**$^{13}\text{C}\{^1\text{H}\}$  NMR** (101 MHz, Acetone- $d_6$ )  $\delta$  181.2, 165.6, 157.6, 145.0, 138.0, 134.8, 134.7, 133.9, 133.7, 129.4, 128.3, 128.2, 127.5, 127.4, 126.9, 124.5, 77.9, 67.7, 61.6, 48.1, 41.5, 15.3, 14.6.

**HRMS** (ESI) Calculated for  $\text{C}_{25}\text{H}_{26}\text{O}_4$  ( $[\text{M}] + \text{Na}^+$ ) = 413.1723, Found 413.1721.

**IR** (neat) 2978, 2869, 1736, 1663, 1601, 1453, 1378, 1277, 1230, 1110, 1020, 966, 929, 754, 695, 620, 514  $\text{cm}^{-1}$ .

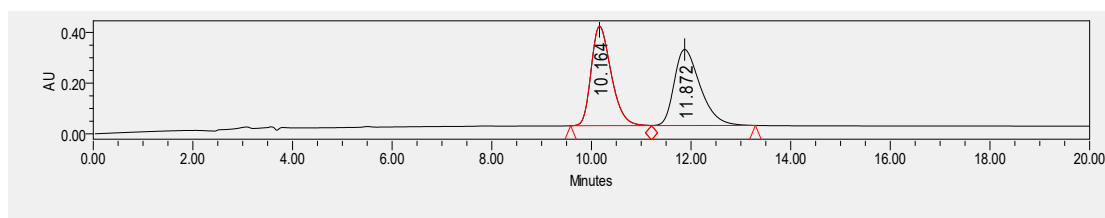

|   | Retention Time | Area     | % Area |
|---|----------------|----------|--------|
| 1 | 10.164         | 10929043 | 50.05  |
| 2 | 11.872         | 10905940 | 49.95  |

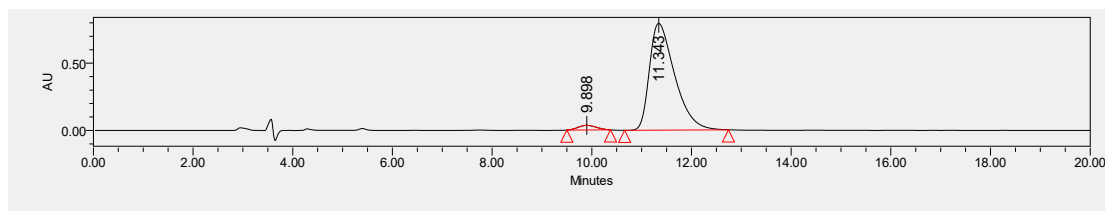

|   | Retention Time | Area     | % Area |
|---|----------------|----------|--------|
| 1 | 9.898          | 879071   | 3.05   |
| 2 | 11.343         | 27900035 | 96.95  |

### Ethyl (R)-4-benzyl-4-cinnamyl-1-oxo-1,4-dihydronaphthalene-2-carboxylate (B7)

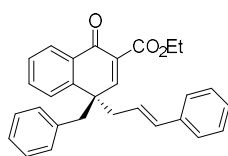

Colorless oil, 55% yield, 94% *ee*;  $[\alpha]^{13.2} = 13.2$  ( $c = 0.46$  in  $\text{CH}_2\text{Cl}_2$ ,  $\lambda = 436$  nm).

**HPLC:** Daicel chiralcel ODH, *n*-hexane/*i*-PrOH = 90/10, 1.0 mL/min,  $\lambda = 224$  nm,  $t_{\text{R}(\text{minor})} = 16.18$  min,  $t_{\text{R}(\text{major})} = 22.88$  min.

**$^1\text{H}$  NMR** (400 MHz, Acetone- $d_6$ )  $\delta$  8.04 (dd,  $J = 8.0, 1.1$  Hz, 1H), 7.91 (dd,  $J = 7.9, 1.5$  Hz, 1H), 7.80 (s, 1H), 7.77 (ddd,  $J = 8.0, 7.3, 1.5$  Hz, 1H), 7.44 – 7.40 (m, 1H), 7.21 – 7.17 (m, 2H), 7.15 – 7.10 (m, 3H), 7.04 – 6.99 (m, 3H), 6.82 – 6.78 (m, 2H), 6.40 (d,  $J = 15.6$  Hz, 1H), 5.82 (dt,  $J = 15.4, 7.4$  Hz, 1H), 4.22 (q,  $J = 7.1$  Hz, 2H), 3.54 – 3.44 (m, 2H), 3.33 – 3.07 (m, 2H), 1.28 (t,  $J = 7.1$  Hz, 3H).

**$^{13}\text{C}\{^1\text{H}\}$  NMR** (101 MHz, Acetone- $d_6$ )  $\delta$  180.8, 165.4, 158.7, 145.8, 138.0, 137.0, 134.7, 134.5, 134.0, 133.6, 130.9, 129.4, 128.4, 128.2, 128.1, 128.1, 127.4, 127.2, 127.0, 125.2, 61.5, 48.6, 48.4, 45.3, 14.6.

**HRMS** (ESI) Calculated for  $\text{C}_{29}\text{H}_{26}\text{O}_3$  ( $[\text{M}] + \text{Na}^+$ ) = 445.1774, Found 445.1775.

**IR** (neat) 3029, 2982, 1736, 1662, 1601, 1494, 1452, 1380, 1276, 1230, 1159, 1138, 1087, 1020, 966, 929, 748, 699, 617  $\text{cm}^{-1}$ .

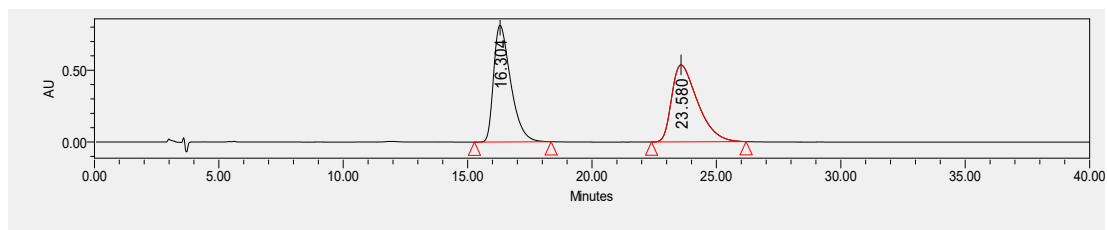

|   | Retention Time | Area     | % Area |
|---|----------------|----------|--------|
| 1 | 16.304         | 38619181 | 49.95  |
| 2 | 23.580         | 38699015 | 50.05  |

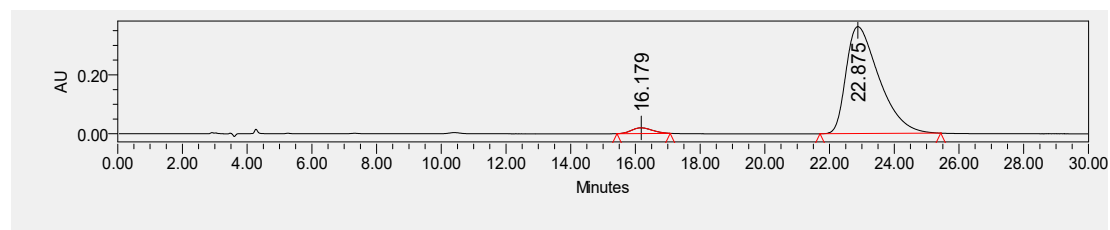

|   | Retention Time | Area     | % Area |
|---|----------------|----------|--------|
| 1 | 16.179         | 863343   | 3.24   |
| 2 | 22.875         | 25757539 | 96.76  |

### Ethyl (R)-4-chloro-4-cinnamyl-1-oxo-1,4-dihydronaphthalene-2-carboxylate (B8)

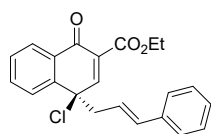

Colorless oil, 83% yield, 93% *ee*;  $[\alpha]^{13.5} = 24.3$  ( $c = 0.59$  in  $\text{CH}_2\text{Cl}_2$ ,  $\lambda = 589$  nm).

**HPLC:** Daicel chiralcel ODH, *n*-hexane/*i*-PrOH = 90/10, 1.0 mL/min,  $\lambda = 224$  nm,  $t_{R(\text{minor})} = 11.44$  min,  $t_{R(\text{major})} = 10.02$  min.

**$^1\text{H}$  NMR** (400 MHz, Acetone- $d_6$ )  $\delta$  8.05 (ddd,  $J = 9.6, 8.0, 1.3$  Hz, 2H), 7.84 (td,  $J = 7.7, 1.5$  Hz, 1H), 7.72 (s, 1H), 7.60 (td,  $J = 7.6, 1.2$  Hz, 1H), 7.21 (qd,  $J = 7.0, 2.4$  Hz, 5H), 6.49 (d,  $J = 15.8$  Hz, 1H), 5.87 (dd,  $J = 15.6, 7.6$  Hz, 1H), 4.29 (q,  $J = 7.1$  Hz, 2H), 3.53 – 3.43 (m, 2H), 1.30 (t,  $J = 7.1$  Hz, 3H).

**$^{13}\text{C}\{^1\text{H}\}$  NMR** (101 MHz, Acetone- $d_6$ )  $\delta$  180.1, 164.7, 151.4, 143.3, 137.6, 137.0, 134.9, 132.6, 131.0, 130.3, 129.5, 129.3, 128.8, 127.3, 127.2, 122.5, 65.1, 62.2, 48.6, 14.5.

**HRMS** (ESI) Calculated for  $\text{C}_{22}\text{H}_{19}\text{ClO}_3$  ( $[\text{M}] + \text{Na}^+$ ) = 389.0915, Found 389.0912.

**IR** (neat) 2982, 1740, 1670, 1600, 1453, 1375, 1278, 1230, 1138, 1087, 968, 930, 757, 694, 511  $\text{cm}^{-1}$ .

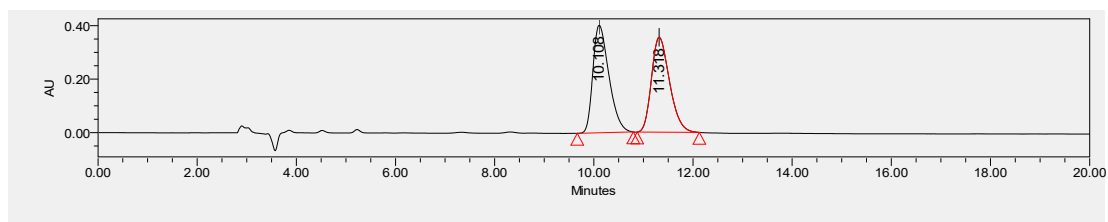

|   | Retention Time | Area    | % Area |
|---|----------------|---------|--------|
| 1 | 10.108         | 9053558 | 50.25  |
| 2 | 11.318         | 8961994 | 49.75  |

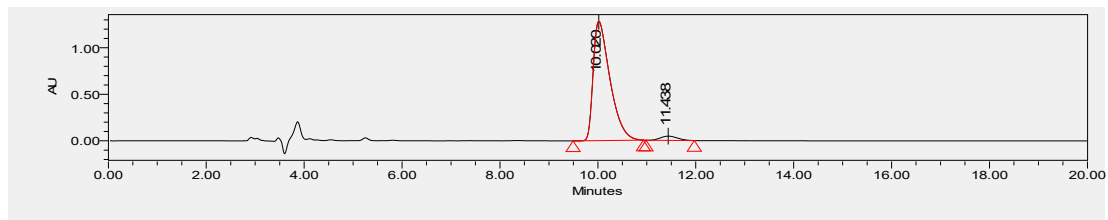

|   | Retention Time | Area     | % Area |
|---|----------------|----------|--------|
| 1 | 10.020         | 30429365 | 96.48  |
| 2 | 11.438         | 1109263  | 3.52   |

### Ethyl (S)-4-cinnamyl-1-oxo-4-propyl-1,4-dihydronaphthalene-2-carboxylate (B9)

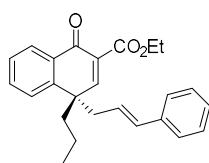

Colorless oil, 62% yield, 93% *ee*;  $[\alpha]^{13.5} = 100.2$  ( $c = 0.47$  in  $\text{CH}_2\text{Cl}_2$ ,  $\lambda = 589$  nm).

**HPLC:** Daicel chiralcel ID, *n*-hexane/*i*-PrOH = 90/10, 1.0 mL/min,  $\lambda = 224$  nm,  $t_{R(\text{minor})} = 16.37$  min,  $t_{R(\text{major})} = 15.02$  min.

**$^1\text{H}$  NMR** (400 MHz, Acetone- $d_6$ )  $\delta$  8.09 (dd,  $J = 7.9, 1.5$  Hz, 1H), 7.79 (d,  $J = 7.4$  Hz, 1H), 7.74 – 7.70 (m, 1H), 7.62 (s, 1H), 7.48 – 7.44 (m, 1H), 7.22 – 7.17 (m, 2H), 7.13 (td,  $J = 5.6, 1.5$  Hz, 3H), 6.31 (d,  $J = 15.7$  Hz, 1H), 5.75 (dd,  $J = 15.6, 7.7$  Hz, 1H), 4.25 (t,  $J = 7.1$  Hz, 2H), 3.05 – 2.91 (m, 2H), 2.31 – 2.07 (m, 2H), 1.02 (dq,  $J = 12.8, 6.7, 6.0$  Hz, 1H), 0.80 – 0.74 (m, 4H).

**$^{13}\text{C}\{^1\text{H}\}$  NMR** (101 MHz, Acetone- $d_6$ )  $\delta$  181.3, 165.7, 159.3, 146.6, 138.1, 134.9, 134.7, 134.1, 133.9, 129.4, 128.2, 128.0, 127.4, 127.4, 126.9, 125.0, 61.6, 47.4, 46.3, 44.1, 18.9, 14.6, 14.5.

**HRMS** (ESI) Calculated for  $\text{C}_{25}\text{H}_{26}\text{O}_3$  ( $[\text{M}] + \text{Na}^+$ ) = 397.1774, Found 397.1772.

**IR** (neat) 3028, 2959, 2932, 2872, 1737, 1661, 1601, 1452, 1380, 1274, 1231, 1141, 1087, 1022, 966, 927, 748, 695, 619, 513  $\text{cm}^{-1}$ .

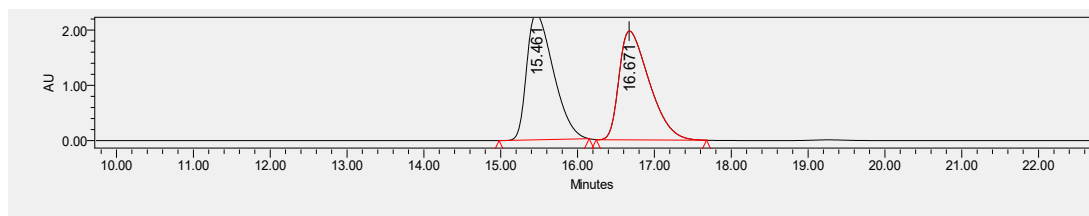

|   | Retention Time | Area     | % Area |
|---|----------------|----------|--------|
| 1 | 15.461         | 54777180 | 50.46  |
| 2 | 16.671         | 53779228 | 49.54  |

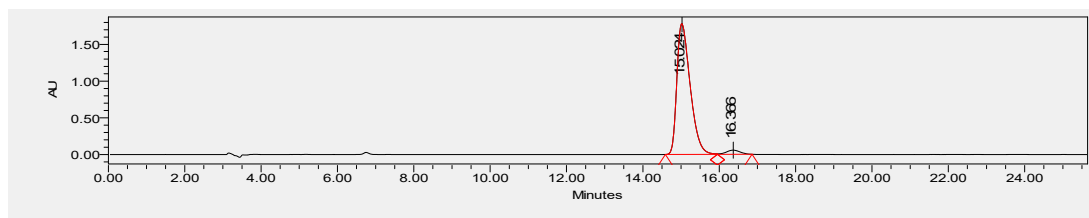

|   | Retention Time | Area     | % Area |
|---|----------------|----------|--------|
| 1 | 15.024         | 43097389 | 96.75  |
| 2 | 16.366         | 1448819  | 3.25   |

### Ethyl (R)-4-cinnamyl-4-cyclopropyl-1-oxo-1,4-dihydronaphthalene-2-carboxylate (B10)

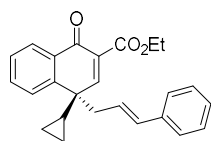

Colorless oil, 34% yield, 78% *ee*;  $[\alpha]^{13.4} = 74.0$  ( $c = 0.19$  in  $\text{CH}_2\text{Cl}_2$ ,  $\lambda = 589$  nm).

**HPLC:** Daicel chiralcel ID, *n*-hexane/*i*-PrOH = 90/10, 1.0 mL/min,  $\lambda = 224$  nm,  $t_{R(\text{minor})} = 17.64$  min,  $t_{R(\text{major})} = 18.51$  min.

**$^1\text{H}$  NMR** (400 MHz, Acetone- $d_6$ )  $\delta$  8.07 (dd,  $J = 7.9, 1.5$  Hz, 1H), 7.90 (dd,  $J = 8.1, 1.1$  Hz, 1H), 7.73 (ddd,  $J = 8.0, 7.2, 1.5$  Hz, 1H), 7.55 (s, 1H), 7.47 (ddd,  $J = 8.2, 7.2, 1.1$  Hz, 1H), 7.21 – 7.16 (m, 2H), 7.14 – 7.11 (m, 3H), 6.37 (d,  $J = 15.8$  Hz, 1H), 5.82 – 5.74 (m, 1H), 4.27 – 4.21 (m, 2H), 3.15 – 2.91 (m, 2H), 1.48 (tt,  $J = 8.1, 5.8$  Hz, 1H), 1.28 (t,  $J = 7.1$  Hz, 3H), 0.61 – 0.56 (m, 2H), 0.46 – 0.41 (m, 1H), 0.28 – 0.23 (m, 1H).

**$^{13}\text{C}\{^1\text{H}\}$  NMR** (101 MHz, Acetone- $d_6$ )  $\delta$  181.1, 165.6, 157.0, 147.2, 138.1, 134.6, 134.6, 133.8, 133.0, 129.4, 128.2, 128.1, 127.3, 126.9, 125.2, 61.7, 45.2, 42.9, 23.0, 14.6, 14.2.

**HRMS** (ESI) Calculated for  $\text{C}_{25}\text{H}_{24}\text{O}_3$  ( $[\text{M}] + \text{Na}^+$ ) = 395.1618, Found 395.1616.

**IR** (neat) 2983, 1737, 1664, 1601, 1453, 1380, 1278, 1230, 1136, 1086, 1022, 966, 928, 761, 695  $\text{cm}^{-1}$ .

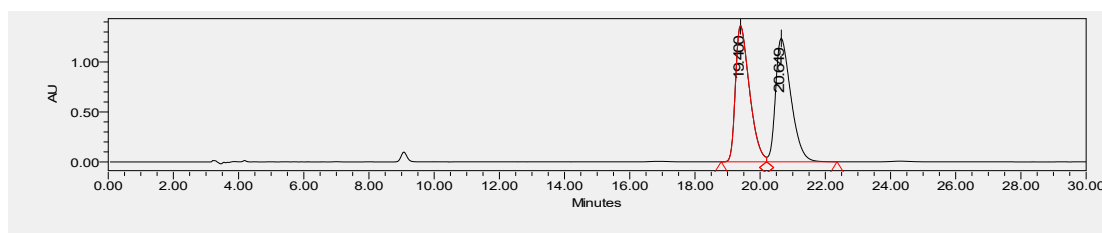

|   | Retention Time | Area     | % Area |
|---|----------------|----------|--------|
| 1 | 19.400         | 40604549 | 49.90  |
| 2 | 20.649         | 40762037 | 50.10  |

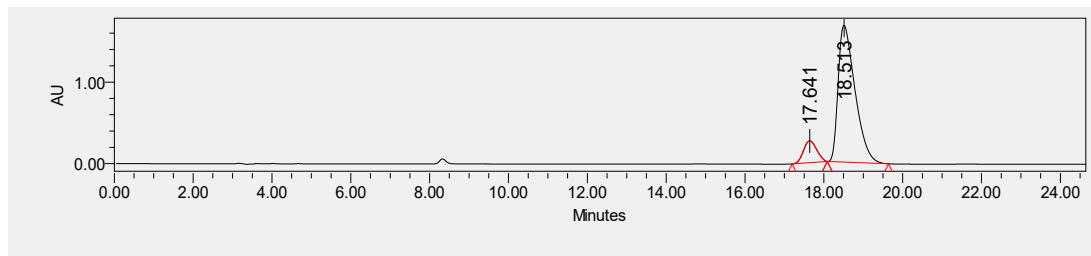

|   | Retention Time | Area     | % Area |
|---|----------------|----------|--------|
| 1 | 17.641         | 6147421  | 11.00  |
| 2 | 18.513         | 49758753 | 89.00  |



### 3-ethyl 1-methyl (R)-1-cinnamyl-4-oxo-1,4-dihydronaphthalene-1,3-dicarboxylate (B11)

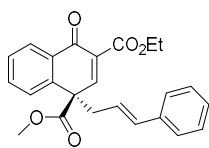

Colorless oil, 36% yield, 80% *ee*;  $[\alpha]^{13.8} = 115.0$  ( $c = 0.22$  in  $\text{CH}_2\text{Cl}_2$ ,  $\lambda = 589$  nm).

**HPLC:** Daicel chiralcel IE, *n*-hexane/*i*-PrOH = 80/20, 1.0 mL/min,  $\lambda = 224$  nm,  $t_{R(\text{minor})} = 14.55$  min,  $t_{R(\text{major})} = 15.94$  min.

**$^1\text{H}$  NMR** (400 MHz, Acetone- $d_6$ )  $\delta$  8.11 (dt,  $J = 7.6, 1.1$  Hz, 1H), 7.78 – 7.73 (m, 3H), 7.56 (ddd,  $J = 8.2, 6.0, 2.4$  Hz, 1H), 7.24 – 7.19 (m, 2H), 7.16 (dq,  $J = 5.6, 1.9, 1.4$  Hz, 3H), 6.38 (d,  $J = 15.8$  Hz, 1H), 5.81 – 5.73 (m, 1H), 4.30 – 4.24 (m, 2H), 3.70 (s, 3H), 3.30 (ddd,  $J = 7.7, 6.7, 1.3$  Hz, 2H), 1.29 (t,  $J = 7.1$  Hz, 3H).

**$^{13}\text{C}\{^1\text{H}\}$  NMR** (101 MHz, Acetone- $d_6$ )  $\delta$  180.6, 171.6, 165.3, 151.6, 141.3, 137.8, 136.0, 134.5, 134.3, 132.8, 129.4, 129.3, 128.4, 128.0, 127.6, 127.0, 123.4, 61.9, 53.9, 53.5, 43.2, 14.6.

**HRMS** (ESI) Calculated for  $\text{C}_{24}\text{H}_{22}\text{O}_5$  ( $[\text{M}] + \text{Na}^+$ ) = 413.1359, Found 413.1358.

**IR** (neat) 2955, 1668, 1600, 1452, 1379, 1280, 1230, 1137, 1086, 1020, 969, 927, 754, 695  $\text{cm}^{-1}$ .

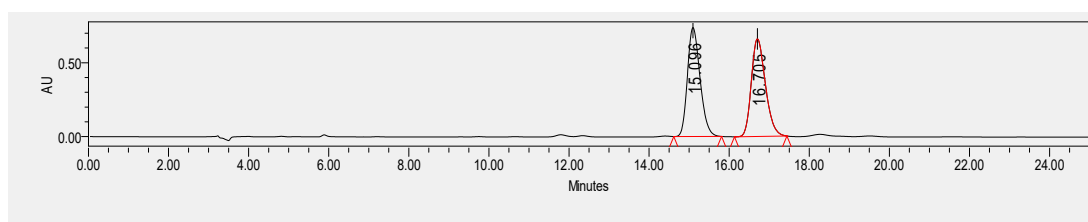

|   | Retention Time | Area     | % Area |
|---|----------------|----------|--------|
| 1 | 15.096         | 16152875 | 50.05  |
| 2 | 16.705         | 16120807 | 49.95  |

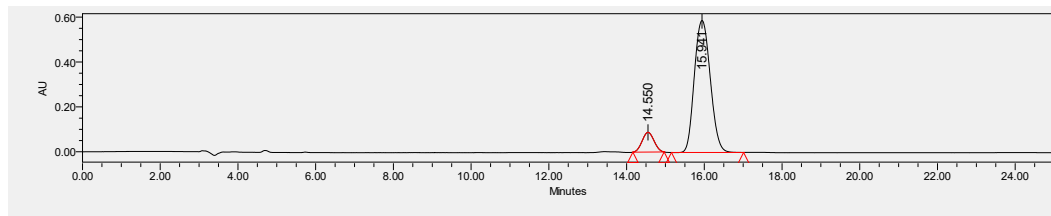

|   | Retention Time | Area     | % Area |
|---|----------------|----------|--------|
| 1 | 14.550         | 1865585  | 10.03  |
| 2 | 15.941         | 16733800 | 89.97  |

### Ethyl (R)-4-cinnamyl-4-ethoxy-1-oxo-1,4-dihydronaphthalene-2-carboxylate (A12)

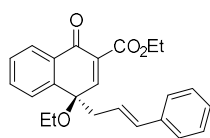

Colorless oil, 30% yield, 5% *ee*.

**HPLC:** Daicel chiralcel IC *n*-hexane/*i*-PrOH = 90/10, 1.0 mL/min,  $\lambda = 224$  nm,

$t_{R(\text{minor})} = 13.45$  min,  $t_{R(\text{major})} = 16.07$  min.

**$^1\text{H}$  NMR** (400 MHz, Acetone- $d_6$ )  $\delta$  8.04 (d,  $J = 7.9$  Hz, 1H), 7.81 – 7.77 (m, 2H), 7.61 (s, 1H), 7.55 (m, 1H), 7.24 (m, 2H), 7.19 – 7.15 (m, 3H), 6.26 (d,  $J = 15.9$  Hz, 1H), 5.82 (dt,  $J = 15.6, 7.6$  Hz, 1H), 4.26 (t,  $J = 7.2$  Hz, 2H), 3.40 – 3.34 (m, 1H), 3.20 – 3.14 (m, 1H), 2.97 – 2.92 (m, 1H), 2.88 – 2.82 (m, 1H), 1.29 (t,  $J = 7.1$  Hz, 3H), 1.17 (t,  $J = 7.0$  Hz, 3H).

**$^{13}\text{C}$  NMR** (101 MHz, Acetone- $d_6$ )  $\delta$  180.5, 164.9, 155.4, 144.2, 138.1, 136.1, 135.8, 134.4, 133.1, 129.4, 129.4, 128.3, 127.3, 127.1, 127.0, 123.3, 77.6, 61.9, 61.7, 47.5, 16.1, 14.5.

**HRMS** (ESI) Calculated for  $\text{C}_{24}\text{H}_{24}\text{O}_4$  ( $[\text{M}+\text{Na}^+]$ ) = 399.1567, Found 399.1568.

**IR** (neat) 2978, 2931, 1738, 1672, 1600, 1451, 1368, 1276, 1073, 1019, 970, 922, 757, 697, 579, 450  $\text{cm}^{-1}$ .

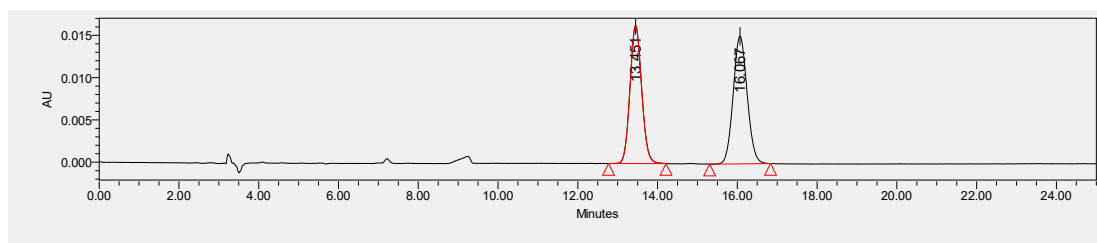

|   | Retention Time | Area   | % Area |
|---|----------------|--------|--------|
| 1 | 13.451         | 331169 | 47.38  |
| 2 | 16.067         | 367779 | 52.62  |

### Ethyl (R)-4-benzyl-4-cinnamyl-6-methyl-1-oxo-1,4-dihydronaphthalene-2-carboxylate (B13)

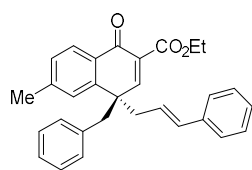

Colorless oil, 59% yield, 92% *ee*;  $[\alpha]^{13.7} = 23.2$  ( $c = 0.50$  in  $\text{CH}_2\text{Cl}_2$ ,  $\lambda = 589$  nm).

**HPLC:** Daicel chiralcel ODH, *n*-hexane/*i*-PrOH = 90/10, 1.0 mL/min,  $\lambda = 224$  nm,  $t_{R(\text{minor})} = 13.64$  min,  $t_{R(\text{major})} = 18.18$  min.

**$^1\text{H}$  NMR** (400 MHz, Acetone- $d_6$ )  $\delta$  7.87 (s, 1H), 7.81 (d,  $J = 8.0$  Hz, 1H), 7.74 (s, 1H), 7.25 – 7.12 (m, 6H), 7.05 – 6.99 (m, 3H), 6.84 – 6.80 (m, 2H), 6.41 (d,  $J = 15.7$  Hz, 1H), 5.81 (dt,  $J = 15.4, 7.4$  Hz, 1H), 4.21 (q,  $J = 7.1$  Hz, 2H), 3.53 – 3.40 (m, 2H), 3.31 – 3.04 (m, 2H), 2.52 (s, 3H), 1.27 (t,  $J = 7.1$  Hz, 3H).

**$^{13}\text{C}\{^1\text{H}\}$  NMR** (101 MHz, Acetone- $d_6$ )  $\delta$  180.6, 165.6, 158.4, 145.9, 144.3, 138.1, 137.1, 134.6, 134.5, 131.7, 131.0, 129.4, 129.1, 128.4, 128.4, 128.2, 127.4, 127.3, 126.9, 125.3, 61.4, 48.4, 48.3, 45.3, 22.0, 14.6.

**HRMS** (ESI) Calculated for  $\text{C}_{30}\text{H}_{28}\text{O}_3$  ( $[\text{M}] + \text{Na}^+$ ) = 459.1931, Found 459.1927.

**IR** (neat) 3028, 2981, 1736, 1661, 1608, 1494, 1450, 1381, 1275, 1232, 1160, 1085, 1021, 966, 931, 842, 799, 738, 699, 529, 480  $\text{cm}^{-1}$ .

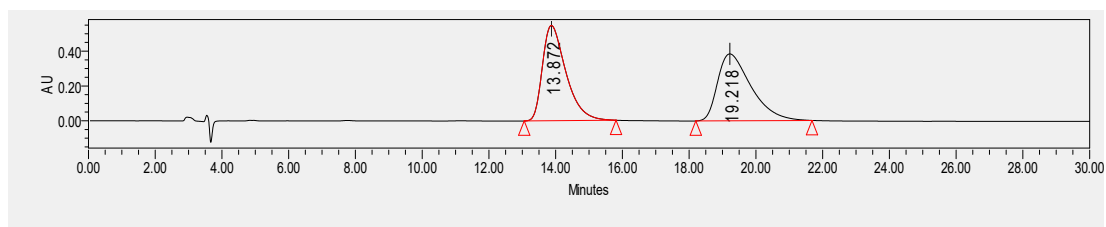

|   | Retention Time | Area     | % Area |
|---|----------------|----------|--------|
| 1 | 13.872         | 26767449 | 50.07  |
| 2 | 19.218         | 26689224 | 49.93  |

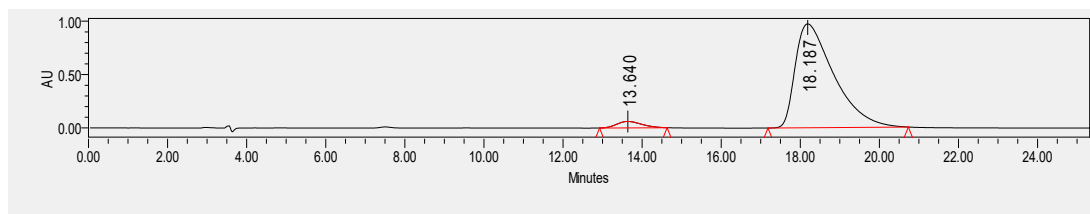

|   | Retention Time | Area     | % Area |
|---|----------------|----------|--------|
| 1 | 13.640         | 2642178  | 3.85   |
| 2 | 18.187         | 65970340 | 96.15  |

### Ethyl (R)-4-benzyl-6-(tert-butyl)-4-cinnamyl-1-oxo-1,4-dihydronaphthalene-2-carboxylate (B14)

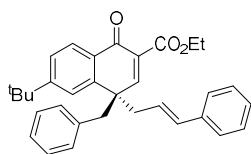

Colorless oil, 52% yield, 91% *ee*;  $[\alpha]^{18.6} = 14.6$  ( $c = 0.46$  in  $\text{CH}_2\text{Cl}_2$ ,  $\lambda = 589$  nm).

**HPLC:** Daicel chiralcel ODH, *n*-hexane/*i*-PrOH = 90/10, 1.0 mL/min,  $\lambda = 224$  nm,  $t_{R(\text{minor})} = 12.03$  min,  $t_{R(\text{major})} = 13.82$  min.

**$^1\text{H}$  NMR** (400 MHz, Acetone- $d_6$ )  $\delta$  8.00 (d,  $J = 1.9$  Hz, 1H), 7.83 (d,  $J = 8.4$  Hz, 1H), 7.79 (s, 1H), 7.45 (dd,  $J = 8.4, 1.9$  Hz, 1H), 7.22 – 7.17 (m, 2H), 7.14 (m, 3H), 7.02 (m, 3H), 6.82 (dd,  $J = 7.1, 2.4$  Hz, 2H), 6.38 (d,  $J = 15.6$  Hz, 1H), 5.85 (dt,  $J = 15.4, 7.5$  Hz, 1H), 4.23 (q,  $J = 7.1$  Hz, 2H), 3.60 – 3.41 (m, 2H), 3.37 – 3.05 (m, 2H), 1.45 (s, 9H), 1.28 (t,  $J = 7.1$  Hz, 3H).

**$^{13}\text{C}$  NMR** (101 MHz, Acetone- $d_6$ )  $\delta$  180.6, 165.6, 158.7, 156.9, 145.3, 138.1, 137.2, 134.7, 134.5, 131.6, 131.0, 129.4, 128.4, 128.2, 127.4, 127.2, 126.9, 125.4, 125.2, 125.1, 61.4, 48.7, 48.3, 45.3, 36.0, 31.5, 14.6.

**HRMS** (ESI) Calculated for  $\text{C}_{31}\text{H}_{26}\text{O}_3$  ( $[\text{M}] + \text{Na}^+$ ) = 501.2400, Found 502.2381.

**IR** (neat) 3028, 2962, 1736, 1663, 1605, 1490, 1451, 1417, 1381, 1270, 1238, 1171, 1022, 966, 930, 850, 806, 744, 699, 597, 491  $\text{cm}^{-1}$ .

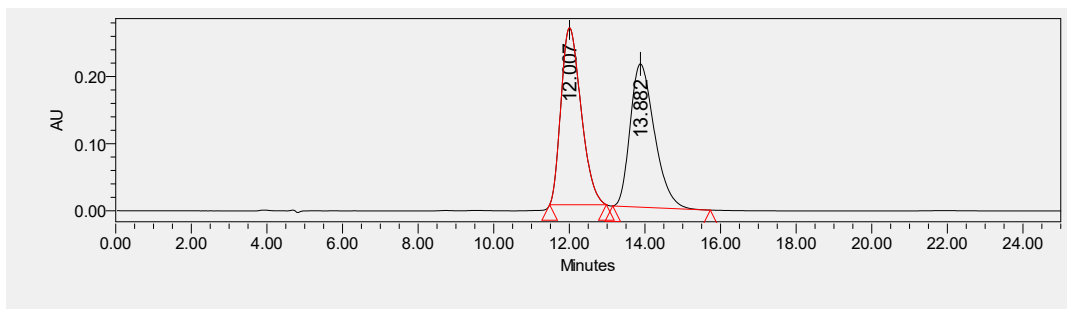

|   | Retention Time | Area    | % Area |
|---|----------------|---------|--------|
| 1 | 12.007         | 9714877 | 50.47  |
| 2 | 13.882         | 9533159 | 49.53  |

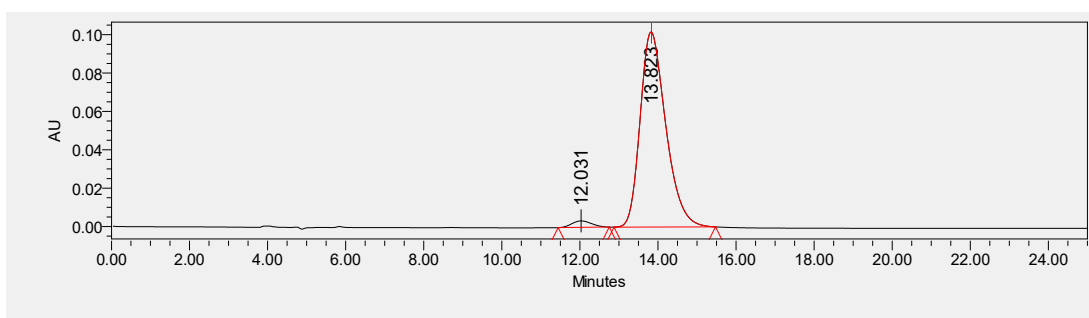

|   | Retention Time | Area    | % Area |
|---|----------------|---------|--------|
| 1 | 12.031         | 118827  | 2.50   |
| 2 | 13.823         | 4626142 | 97.50  |

### Ethyl (R)-4-benzyl-4-cinnamyl-1-oxo-6-phenyl-1,4-dihydronaphthalene-2-carboxylate (B15)

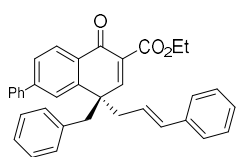

Colorless oil, 45% yield, 94% *ee*;  $[\alpha]^{18.6} = 87.7$  ( $c = 0.34$  in  $\text{CH}_2\text{Cl}_2$ ,  $\lambda = 589$  nm).

**HPLC:** Daicel chiralcel ID, *n*-hexane/*i*-PrOH = 80/20, 1.0 mL/min,  $\lambda = 224$  nm,  $t_{R(\text{minor})} = 23.31$  min,  $t_{R(\text{major})} = 29.21$  min.

**$^1\text{H}$  NMR** (400 MHz, Acetone- $d_6$ )  $\delta$  8.31 (d,  $J = 1.9$  Hz, 1H), 7.99 (d,  $J = 8.2$  Hz, 1H), 7.89 – 7.85 (m, 2H), 7.84 (s, 1H), 7.72 (dd,  $J = 8.2, 1.8$  Hz, 1H), 7.55 (t,  $J = 7.5$  Hz, 2H), 7.50 – 7.42 (m, 1H), 7.21 – 7.10 (m, 5H), 7.04 (m, 3H), 6.88 (dd,  $J = 6.4, 3.2$  Hz, 2H), 6.45 (d,  $J = 15.8$  Hz, 1H), 5.91 (dt,  $J = 15.4, 7.5$  Hz, 1H), 4.24 (q,  $J = 7.1$  Hz, 2H), 3.60 (dd,  $J = 73.5, 13.4$  Hz, 2H), 3.49 – 3.11 (m, 2H), 1.29 (t,  $J = 7.1$  Hz, 3H).

**$^{13}\text{C}$  NMR** (101 MHz, Acetone- $d_6$ )  $\delta$  180.5, 165.5, 158.9, 146.4, 145.9, 140.9, 138.0, 137.2, 134.7, 134.5, 132.8, 131.0, 130.0, 129.4, 129.3, 128.5, 128.4, 128.2, 128.0, 127.4, 127.0, 126.8, 126.5, 125.4, 61.5, 48.8, 48.3, 45.2, 14.6.

**HRMS** (ESI) Calculated for  $\text{C}_{35}\text{H}_{34}\text{O}_3$  ( $[\text{M}] + \text{Na}^+$ ) = 501.2400, Found 501.2381.

**IR** (neat) 3029, 2982, 2927, 1734, 1661, 1603, 1492, 1449, 1409, 1381, 1268, 1235, 1166, 1090, 1022, 967, 927, 849, 806, 760, 698, 487  $\text{cm}^{-1}$ .

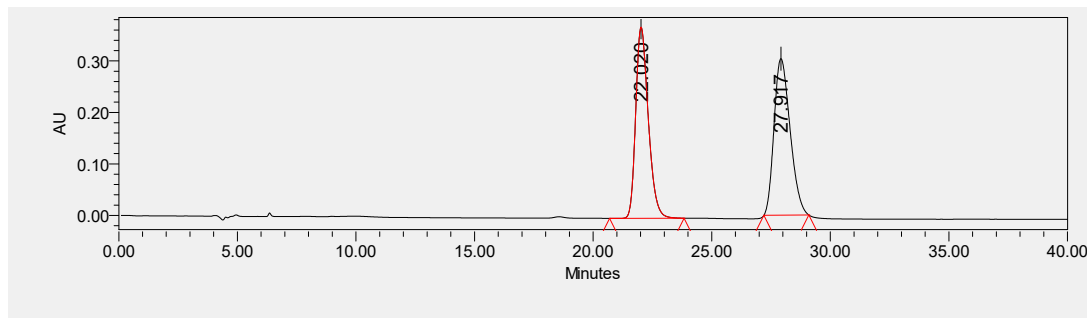

|   | Retention Time | Area     | % Area |
|---|----------------|----------|--------|
| 1 | 22.020         | 13650694 | 48.87  |
| 2 | 27.917         | 14279248 | 51.13  |

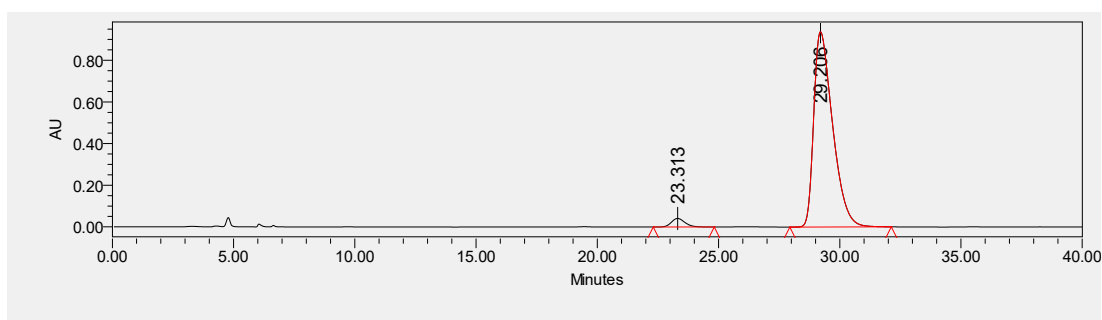

|   | Retention Time | Area     | % Area |
|---|----------------|----------|--------|
| 1 | 23.313         | 1603846  | 3.07   |
| 2 | 29.206         | 50565777 | 96.93  |

### Ethyl (R)-4-benzyl-4-cinnamyl-6-methoxy-1-oxo-1,4-dihydronaphthalene-2-carboxylate (B16)

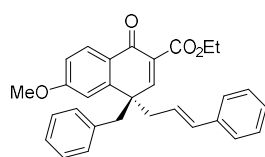

Colorless oil, 61% yield, 93% *ee*;  $[\alpha]^{18.6} = 21.0$  ( $c = 0.53$  in  $\text{CH}_2\text{Cl}_2$ ,  $\lambda = 589$  nm).

**HPLC:** Daicel chiralce ODH, *n*-hexane/*i*-PrOH = 80/20, 1.0 mL/min,  $\lambda = 224$  nm,  $t_{R(\text{minor})} = 16.59$  min,  $t_{R(\text{major})} = 19.78$  min.

**$^1\text{H}$  NMR** (400 MHz, Acetone- $d_6$ )  $\delta$  7.87 (d,  $J = 8.8$  Hz, 1H), 7.70 (s, 1H), 7.50 (d,  $J = 2.4$  Hz, 1H), 7.21 – 7.11 (m, 5H), 7.04 (m, 3H), 6.98 (dd,  $J = 8.8, 2.5$  Hz, 1H), 6.87 (dd,  $J = 6.5, 3.1$  Hz, 2H), 6.42 (d,  $J = 15.7$  Hz, 1H), 5.84 (dt,  $J = 15.4, 7.4$  Hz, 1H), 4.21 (q,  $J = 7.1$  Hz, 2H), 4.00 (s, 3H), 3.55 – 3.40 (m, 2H), 3.33 – 3.03 (m, 2H), 1.27 (t,  $J = 7.1$  Hz, 3H).

**$^{13}\text{C}$  NMR** (101 MHz, Acetone- $d_6$ )  $\delta$  179.9, 165.7, 164.3, 157.8, 148.2, 138.1, 137.1, 134.5, 134.5, 130.9, 129.6, 129.4, 128.4, 128.2, 127.5, 127.4, 126.9, 125.3, 115.2, 111.8, 61.3, 56.2, 48.6, 48.4, 45.4, 14.6.

**HRMS** (ESI) Calculated for  $\text{C}_{30}\text{H}_{28}\text{O}_4$  ( $[\text{M}] + \text{Na}^+$ ) = 475.1880, Found 475.1886.

**IR** (neat) 3028, 2360, 2242, 1734, 1659, 1600, 1492, 1450, 1381, 1275, 1233, 1085, 1022, 968, 931, 801, 744, 699, 576, 489  $\text{cm}^{-1}$ .

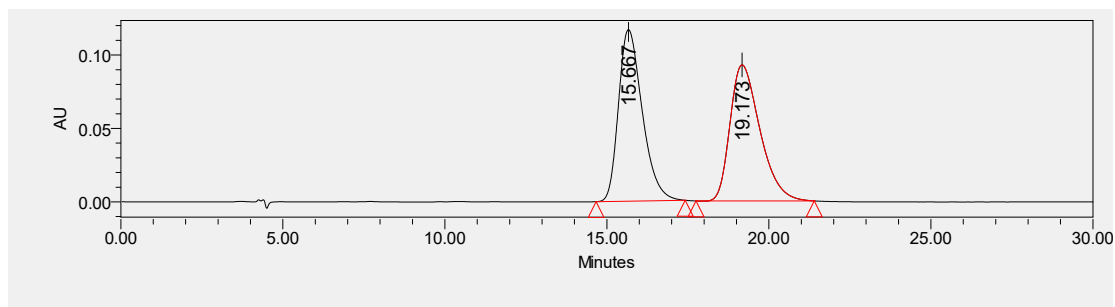

|   | Retention Time | Area    | % Area |
|---|----------------|---------|--------|
| 1 | 15.667         | 5949304 | 50.02  |
| 2 | 19.173         | 5944016 | 49.98  |

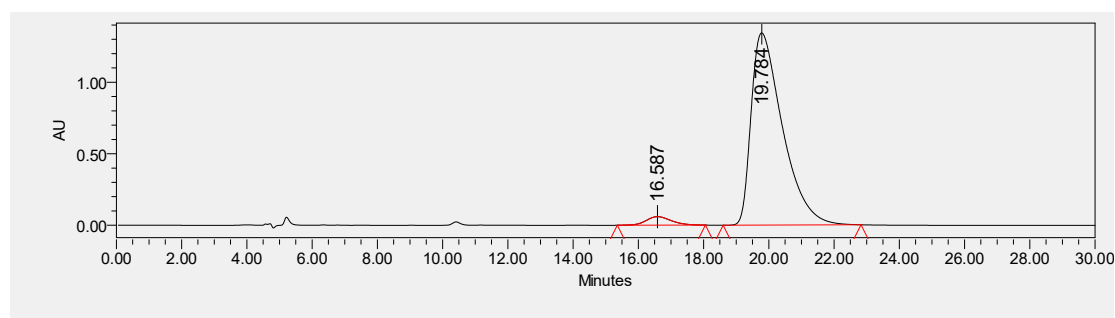

|   | Retention Time | Area     | % Area |
|---|----------------|----------|--------|
| 1 | 16.587         | 3214549  | 3.47   |
| 2 | 19.784         | 89548507 | 96.53  |

### Ethyl (R)-4-benzyl-6-chloro-4-cinnamyl-1-oxo-1,4-dihydronaphthalene-2-carboxylate (B17)

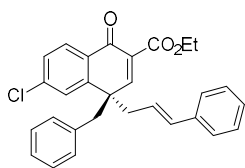

Colorless oil, 51% yield, 88% *ee*;  $[\alpha]^{13.4} = -11.9$  ( $c = 0.37$  in  $\text{CH}_2\text{Cl}_2$ ,  $\lambda = 436$  nm).

**HPLC:** Daicel chiralcel ODH, *n*-hexane/*i*-PrOH = 90/10, 1.0 mL/min,  $\lambda = 224$  nm,  $t_{\text{R}(\text{minor})} = 14.40$  min,  $t_{\text{R}(\text{major})} = 18.49$  min.

**$^1\text{H}$  NMR** (400 MHz, Acetone- $d_6$ )  $\delta$  8.12 (d,  $J = 2.0$  Hz, 1H), 7.88 (d,  $J = 8.5$  Hz, 1H), 7.84 (s, 1H), 7.45 (dd,  $J = 8.5, 2.0$  Hz, 1H), 7.22 – 7.13 (m, 5H), 7.07 – 7.03 (m, 3H), 6.86 – 6.82 (m, 2H), 6.43 (d,  $J = 15.7$  Hz, 1H), 5.86 (dt,  $J = 15.4, 7.5$  Hz, 1H), 4.23 (q,  $J = 7.1$  Hz, 2H), 3.58 – 3.47 (m, 2H), 3.38 – 3.10 (m, 2H), 1.28 (t,  $J = 7.1$  Hz, 3H).

**$^{13}\text{C}\{^1\text{H}\}$  NMR** (101 MHz, Acetone- $d_6$ )  $\delta$  179.9, 165.1, 158.8, 147.9, 139.8, 137.9, 136.8, 135.0, 134.3, 132.6, 130.9, 129.4, 129.3, 128.6, 128.6, 128.3, 128.2, 127.6, 127.00, 124.9, 61.6, 48.8, 48.2, 45.0, 14.6, 14.5.

**HRMS** (ESI) Calculated for  $\text{C}_{29}\text{H}_{25}\text{ClO}_3$  ( $[\text{M}] + \text{Na}^+$ ) = 479.1384, Found 479.1384.

**IR** (neat) 3028, 2982, 1736, 1665, 1599, 1491, 1442, 1379, 1276, 1232, 1162, 1138, 1086, 1020, 967, 928, 799, 756, 693, 619, 546, 509  $\text{cm}^{-1}$ .

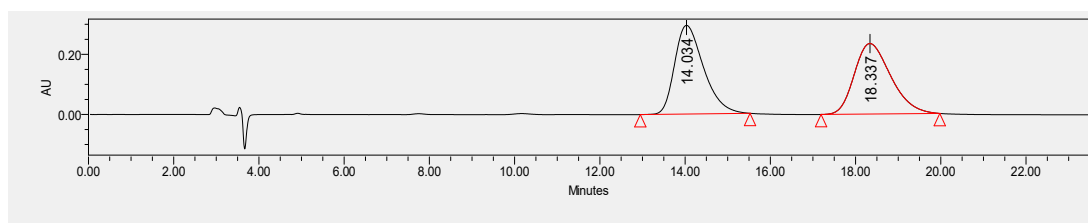

|   | Retention Time | Area     | % Area |
|---|----------------|----------|--------|
| 1 | 14.034         | 13923040 | 49.99  |
| 2 | 18.337         | 13930135 | 50.01  |

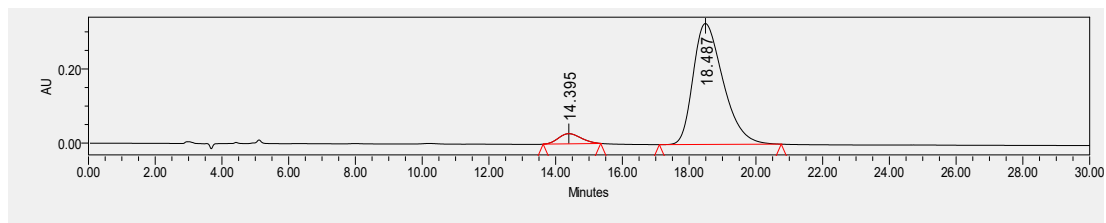

|   | Retention Time | Area     | % Area |
|---|----------------|----------|--------|
| 1 | 14.395         | 1291349  | 5.96   |
| 2 | 18.487         | 20371987 | 94.04  |

### Ethyl (R)-4-benzyl-4-cinnamyl-6-cyano-1,4-dihydronaphthalene-2-carboxylate (B18)

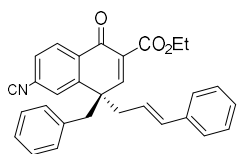

Colorless oil, 35% yield, 80% *ee*;  $[\alpha]^{18.6} = 46.0$  ( $c = 0.28$  in  $\text{CH}_2\text{Cl}_2$ ,  $\lambda = 589$  nm).

**HPLC:** Daicel chiralcel ODH, *n*-hexane/*i*-PrOH = 80/20, 1.0 mL/min,  $\lambda = 224$  nm,  $t_{R(\text{minor})} = 26.28$  min,  $t_{R(\text{major})} = 34.73$  min.

**$^1\text{H}$  NMR** (400 MHz, Acetone- $d_6$ )  $\delta$  8.57 (d,  $J = 1.5$  Hz, 1H), 8.01 (d,  $J = 8.1$  Hz, 1H), 7.97 (s, 1H), 7.80 (dd,  $J = 8.1, 1.5$  Hz, 1H), 7.21 – 7.12 (m, 5H), 7.04 (m, 3H), 6.83 (dd,  $J = 6.4, 3.1$  Hz, 2H), 6.45 (d,  $J = 15.7$  Hz, 1H), 5.88 (dt,  $J = 15.5, 7.5$  Hz, 1H), 4.25 (q,  $J = 7.1$  Hz, 2H), 3.65 – 3.52 (m, 2H), 3.32 (ddd,  $J = 97.4, 14.5, 8.0$  Hz, 2H), 1.29 (t,  $J = 7.1$  Hz, 3H).

**$^{13}\text{C}$  NMR** (101 MHz, Acetone- $d_6$ )  $\delta$  179.6, 164.8, 159.7, 146.7, 137.8, 136.7, 136.5, 135.2, 134.3, 132.9, 131.3, 131.0, 129.4, 128.6, 128.3, 128.1, 127.6, 127.0, 124.7, 119.0, 116.9, 61.7, 49.0, 48.1, 44.8, 14.6.

**HRMS** (ESI) Calculated for  $\text{C}_{30}\text{H}_{25}\text{NO}_3$  ( $[\text{M}] + \text{Na}^+$ ) = 470.1727, Found 470.1731.

**IR** (neat) 3030, 2927, 2233, 1734, 1667, 1605, 1494, 1449, 1416, 1382, 1273, 1230, 1154, 1082, 1020, 969, 930, 853, 804, 742, 699, 587, 495  $\text{cm}^{-1}$ .

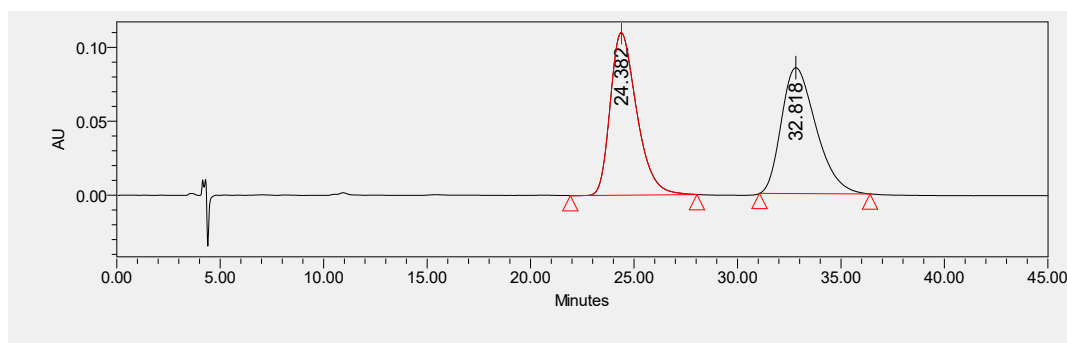

|   | Retention Time | Area    | % Area |
|---|----------------|---------|--------|
| 1 | 24.382         | 9750522 | 49.57  |
| 2 | 32.818         | 9918282 | 50.43  |

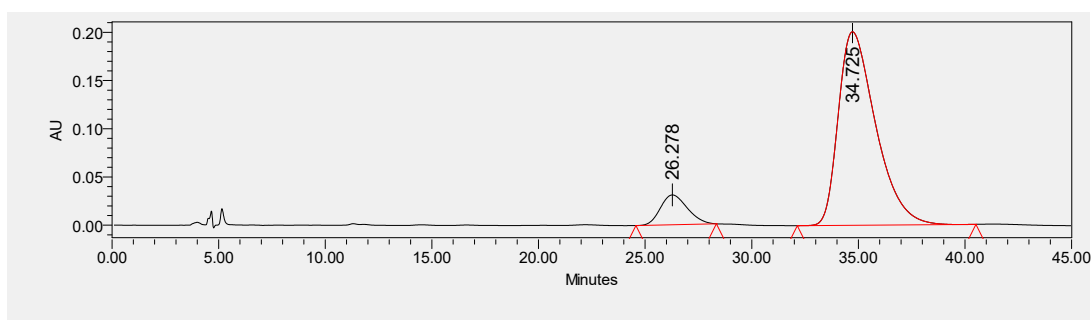

|   | Retention Time | Area    | % Area |
|---|----------------|---------|--------|
| 1 | 26.278         | 2719661 | 10.03  |



### Ethyl (R)-4-benzyl-4-cinnamyl-8-methyl-1-oxo-1,4-dihydronaphthalene-2-carboxylate (B19)

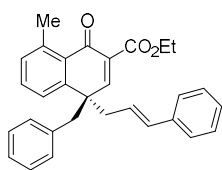

Colorless oil, 62% yield, 60% *ee*;  $[\alpha]^{13.3} = -25.9$  ( $c = 0.51$  in  $\text{CH}_2\text{Cl}_2$ ,  $\lambda = 436$  nm).

**HPLC:** Daicel chiralcel ODH, *n*-hexane/*i*-PrOH = 80/20, 1.0 mL/min,  $\lambda = 224$  nm,  $t_{R(\text{minor})} = 8.04$  min,  $t_{R(\text{major})} = 10.62$  min.

**$^1\text{H}$  NMR** (400 MHz, Acetone- $d_6$ )  $\delta$  7.87 (d,  $J = 7.9$  Hz, 1H), 7.65 – 7.56 (m, 2H), 7.26 – 7.08 (m, 6H), 7.07 – 6.98 (m, 3H), 6.86 – 6.77 (m, 2H), 6.41 (d,  $J = 15.8$  Hz, 1H), 5.83 (dt,  $J = 15.4, 7.4$  Hz, 1H), 4.21 (q,  $J = 7.1$  Hz, 2H), 3.42 (q,  $J = 13.3$  Hz, 2H), 3.31 – 3.01 (m, 2H), 2.52 (s, 3H), 1.27 (t,  $J = 7.1$  Hz, 3H).

**$^{13}\text{C}\{^1\text{H}\}$  NMR** (101 MHz, Acetone- $d_6$ )  $\delta$  183.3, 165.7, 155.5, 147.2, 141.2, 138.1, 137.1, 136.2, 134.5, 132.7, 132.4, 131.8, 131.1, 129.4, 128.4, 128.2, 127.4, 127.0, 126.4, 125.4, 61.4, 49.1, 48.6, 45.7, 23.7, 14.6.

**HRMS** (ESI) Calculated for  $\text{C}_{30}\text{H}_{28}\text{O}_3$  ( $[\text{M}] + \text{Na}^+$ ) = 459.1931, Found 459.1926.

**IR** (neat) 3028, 2980, 2928, 1735, 1665, 1593, 1494, 1469, 1450, 1422, 1376, 1269, 1229, 1126, 1088, 1021, 966, 928, 792, 749, 699, 476  $\text{cm}^{-1}$ .

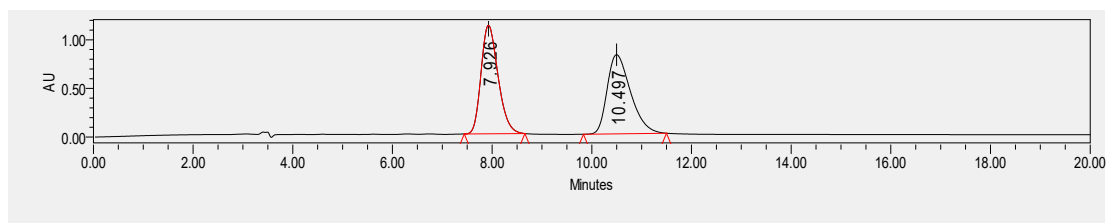

|   | Retention Time | Area     | % Area |
|---|----------------|----------|--------|
| 1 | 7.926          | 26443859 | 50.00  |
| 2 | 10.497         | 26446568 | 50.00  |

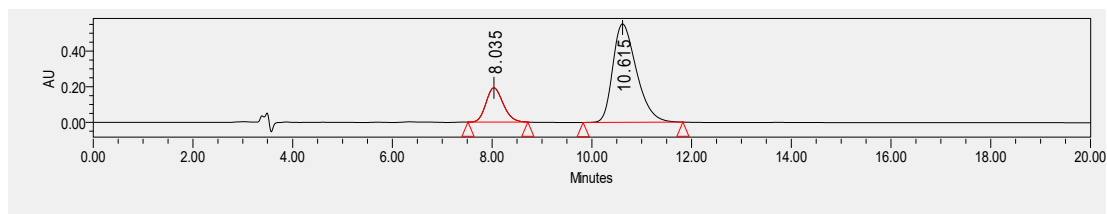

|   | Retention Time | Area     | % Area |
|---|----------------|----------|--------|
| 1 | 8.035          | 4603208  | 20.17  |
| 2 | 10.615         | 18222112 | 79.83  |

**Ethyl (R,E)-4-(3-(4-nitrophenyl)allyl)-1-oxo-4-(3-phenylprop-2-yn-1-yl)-1,4-dihydronaphthalene-2-carboxylate (B20)**

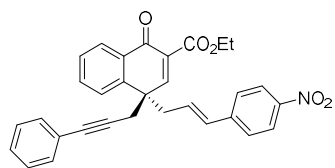

in CH<sub>2</sub>Cl<sub>2</sub>, λ = 589 nm). White solid, Mp: 37–40 °C, 76% yield, 90% *ee*; [α]<sup>14.0</sup> = -22.3 (*c* = 0.72)

**SFC Chiralcel BYPASS**, CO<sub>2</sub>/MeOH = 80/20, 1.5 mL/min, λ = 224 nm, *t*<sub>R(minor)</sub> = 10.34 min, *t*<sub>R(major)</sub> = 12.95 min

**<sup>1</sup>H NMR** (400 MHz, Acetone-d<sub>6</sub>) δ 8.16 – 8.03 (m, 3H), 7.95 (d, *J* = 7.9 Hz, 1H), 7.80 (s, 1H), 7.75 (ddd, *J* = 8.0, 7.2, 1.5 Hz, 1H), 7.50 (ddd, *J* = 8.2, 7.3, 1.1 Hz, 1H), 7.45 – 7.42 (m, 2H), 7.30 – 7.22 (m, 3H), 7.21 – 7.16 (m, 2H), 6.61 – 6.55 (m, 1H), 6.19 – 6.11 (m, 1H), 4.27 (q, *J* = 7.1 Hz, 2H), 3.35 – 3.20 (m, 4H), 1.28 (t, *J* = 7.1 Hz, 3H).

**<sup>13</sup>C{<sup>1</sup>H} NMR** (101 MHz, Acetone-d<sub>6</sub>) δ 181.1, 165.6, 156.8, 147.8, 145.4, 144.4, 135.3, 134.1, 133.8, 133.1, 132.2, 130.5, 129.3, 129.0, 128.5, 127.8, 127.5, 127.4, 124.7, 124.0, 86.1, 84.8, 61.7, 46.6, 44.1, 32.9, 14.6, 14.4.

**HRMS** (ESI) Calculated for C<sub>31</sub>H<sub>25</sub>NO<sub>5</sub> ([M]<sup>+</sup>+Na<sup>+</sup>) = 514.1625, Found 514.1626.

**IR** (neat) 2982, 1734, 1662, 1597, 1514, 1490, 1453, 1379, 1340, 1276, 1232, 1181, 1138, 1109, 1087, 1018, 971, 928, 860, 831, 758, 692, 636, 528 cm<sup>-1</sup>.

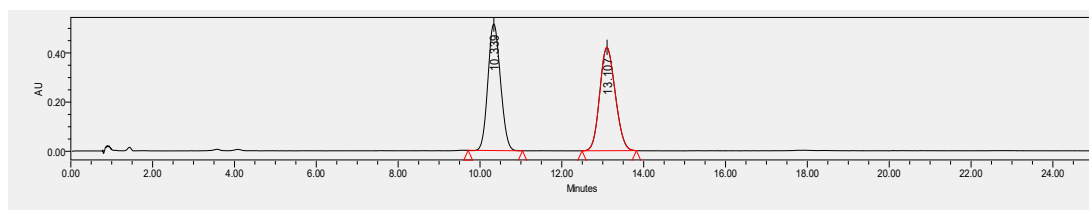

|   | Retention Time | Area     | % Area |
|---|----------------|----------|--------|
| 1 | 10.339         | 10961098 | 49.84  |
| 2 | 13.107         | 11030813 | 50.16  |

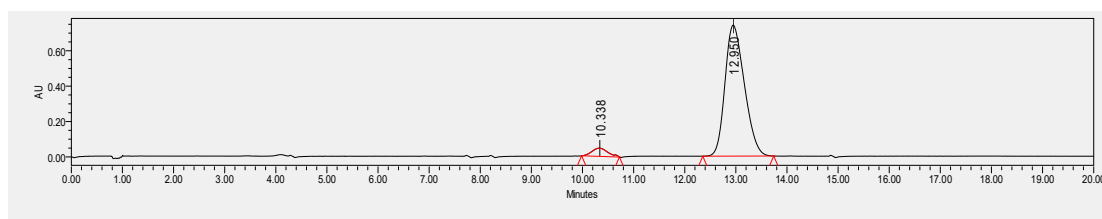

|   | Retention Time | Area     | % Area |
|---|----------------|----------|--------|
| 1 | 10.338         | 1007441  | 4.91   |
| 2 | 12.950         | 19497495 | 95.09  |

**Ethyl (R,E)-1-oxo-4-(3-phenylprop-2-yn-1-yl)-4-(3-(4-(trifluoromethyl)phenyl)allyl)-1,4-dihydronaphthalene-2-carboxylate (B21)**

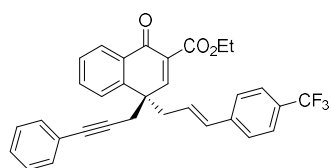

White solid, Mp: 34–37 °C, 54% yield, 92% *ee*;  $[\alpha]^{14.0} = -30.3$  ( $c = 0.52$  in  $\text{CH}_2\text{Cl}_2$ ,  $\lambda = 589$  nm).

**HPLC:** Daicel chiralcel ID, *n*-hexane/*i*-PrOH = 95/5, 1.0 mL/min,  $\lambda = 224$  nm,  $t_{R(\text{minor})} = 28.80$  min,  $t_{R(\text{major})} = 30.98$  min.

**$^1\text{H}$  NMR** (400 MHz, Acetone- $d_6$ )  $\delta$  8.11 (dd,  $J = 7.8, 1.5$  Hz, 1H), 7.94 (dd,  $J = 8.0, 1.0$  Hz, 1H), 7.79 (s, 1H), 7.75 (td,  $J = 7.7, 1.5$  Hz, 1H), 7.55 (d,  $J = 8.2$  Hz, 2H), 7.49 (td,  $J = 7.6, 1.0$  Hz, 1H), 7.39 (d,  $J = 8.1$  Hz, 2H), 7.26 (qd,  $J = 4.7, 1.6$  Hz, 3H), 7.21 – 7.16 (m, 2H), 6.52 (d,  $J = 15.7$  Hz, 1H), 6.04 (dt,  $J = 15.4, 7.4$  Hz, 1H), 4.27 (q,  $J = 7.1$  Hz, 2H), 3.32 – 3.16 (m, 4H), 1.28 (t,  $J = 7.1$  Hz, 3H).

**$^{13}\text{C}\{^1\text{H}\}$  NMR** (101 MHz, Acetone- $d_6$ )  $\delta$  181.2, 165.6, 156.9, 145.5, 141.9, 135.3, 134.1, 133.9, 133.6, 132.3, 129.3, 129.0, 128.5, 128.4, 127.5, 127.5, 127.4, 126.4, 126.4, 126.3, 126.3, 124.1, 86.1, 84.8, 61.7, 46.6, 44.0, 32.9, 14.6.

**$^{19}\text{F}$  NMR** (377 MHz, Acetone- $d_6$ )  $\delta$  -63.0.

**HRMS** (ESI) Calculated for  $\text{C}_{32}\text{H}_{25}\text{F}_3\text{O}_3$  ( $[\text{M}] + \text{Na}^+$ ) = 537.1648, Found 537.1651.

**IR** (neat) 2984, 1736, 1665, 1602, 1490, 1454, 1380, 1325, 1277, 1233, 1164, 1120, 1067, 1017, 970, 929, 860, 759, 596, 526  $\text{cm}^{-1}$ .

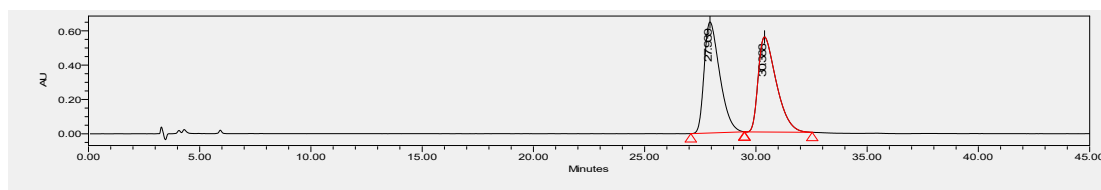

|   | Retention Time | Area     | % Area |
|---|----------------|----------|--------|
| 1 | 27.939         | 31409931 | 50.08  |
| 2 | 30.388         | 31303501 | 49.92  |

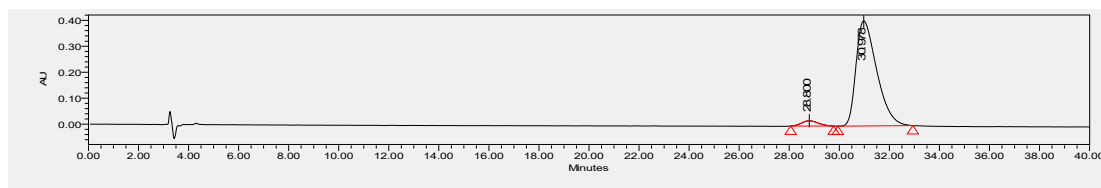

|   | Retention Time | Area     | % Area |
|---|----------------|----------|--------|
| 1 | 28.800         | 945659   | 3.90   |
| 2 | 30.978         | 23273402 | 96.10  |

**Ethyl (R,E)-4-(3-(4-fluorophenyl)allyl)-1-oxo-4-(3-phenylprop-2-yn-1-yl)-1,4-dihydronaphthalene-2-carboxylate (B22)**

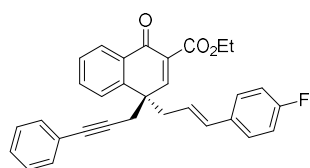

Colorless oil, 84% yield, 94% *ee*;  $[\alpha]^{14.2} = -26.5$  ( $c = 0.75$  in  $\text{CH}_2\text{Cl}_2$ ,  $\lambda = 589$  nm).

**HPLC:** Daicel chiralcel ODH, *n*-hexane/*i*-PrOH = 90/10, 1.0 mL/min,  $\lambda = 254$  nm,  $t_{R(\text{minor})} = 19.73$  min,  $t_{R(\text{major})} = 23.53$  min.

**$^1\text{H}$  NMR** (400 MHz, Acetone- $d_6$ )  $\delta$  8.12 (dd,  $J = 7.9, 1.5$  Hz, 1H), 7.92 (dd,  $J = 8.0, 1.1$  Hz, 1H), 7.77 (s, 1H), 7.76 – 7.72 (m, 1H), 7.51 – 7.46 (m, 1H), 7.26 (pd,  $J = 4.3, 1.8$  Hz, 3H), 7.23 – 7.17 (m, 4H), 7.00 – 6.94 (m, 2H), 6.41 (d,  $J = 15.7$  Hz, 1H), 5.80 (dt,  $J = 15.4, 7.4$  Hz, 1H), 4.27 (q,  $J = 7.1$  Hz, 2H), 3.28 (s, 2H), 3.25 – 3.10 (m, 2H), 1.28 (t,  $J = 7.1$  Hz, 3H).

**$^{13}\text{C}\{^1\text{H}\}$  NMR** (101 MHz, Acetone- $d_6$ )  $\delta$  181.2, 165.6, 163.0 (d,  $^1J_{\text{FC}} = 244.8$  Hz), 157.1, 145.6, 135.2, 134.4, 133.9, 133.7, 132.2, 129.0, 129.0, 128.8 (d,  $^3J_{\text{FC}} = 8.1$  Hz), 128.4, 127.4, 127.3, 124.9 (d,  $^4J_{\text{FC}} = 2.5$  Hz), 124.1, 116.1 (d,  $^2J_{\text{FC}} = 21.7$  Hz), 86.2, 84.7, 61.7, 46.7, 44.1, 32.8, 14.6.

**$^{19}\text{F}$  NMR** (377 MHz, Acetone- $d_6$ )  $\delta$  -116.

**HRMS** (ESI) Calculated for  $\text{C}_{31}\text{H}_{25}\text{FO}_3$  ( $[\text{M}] + \text{Na}^+$ ) = 487.1680, Found 487.1678.

**IR** (neat) 2983, 1734, 1663, 1600, 1508, 1490, 1454, 1379, 1276, 1228, 1159, 1138, 1088, 1017, 967, 930, 847, 816, 759, 692, 640, 572, 523  $\text{cm}^{-1}$ .

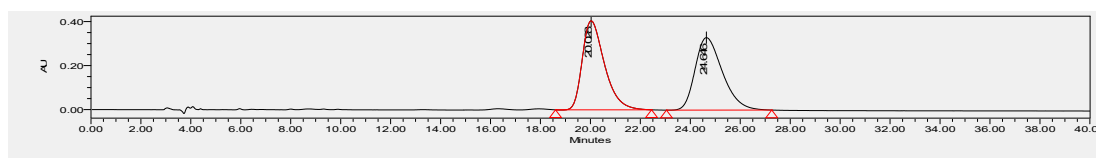

|   | Retention Time | Area     | % Area |
|---|----------------|----------|--------|
| 1 | 20.028         | 24961068 | 50.02  |
| 2 | 24.646         | 24945141 | 49.98  |

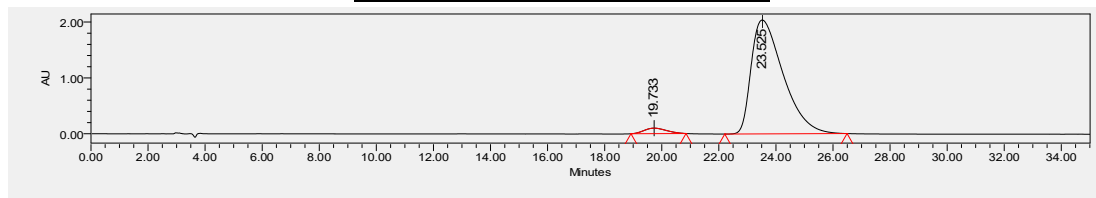

|   | Retention Time | Area      | % Area |
|---|----------------|-----------|--------|
| 1 | 19.733         | 5379672   | 3.27   |
| 2 | 23.525         | 158938968 | 96.73  |

**Ethyl (R,E)-4-(3-(4-bromophenyl)allyl)-1-oxo-4-(3-phenylprop-2-yn-1-yl)-1,4-dihydronaphthalene-2-carboxylate (B23)**

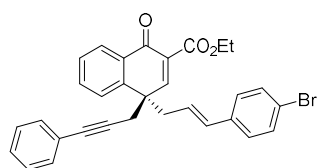

White solid, Mp: 42–45 °C, 85% yield, 91% *ee*;  $[\alpha]^{14.0} = -16.6$  ( $c = 0.78$  in  $\text{CH}_2\text{Cl}_2$ ,  $\lambda = 589$  nm).

**HPLC:** Daicel chiralcel ID, *n*-hexane/*i*-PrOH = 90/10, 1.0 mL/min,  $\lambda = 224$  nm,  $t_{R(\text{minor})} = 26.07$  min,  $t_{R(\text{major})} = 28.11$  min.

**$^1\text{H}$  NMR** (400 MHz, Acetone- $d_6$ )  $\delta$  8.11 (dd,  $J = 7.9, 1.5$  Hz, 1H), 7.92 (dd,  $J = 8.0, 1.1$  Hz, 1H), 7.77 – 7.72 (m, 2H), 7.48 (td,  $J = 7.6, 1.1$  Hz, 1H), 7.40 – 7.36 (m, 2H), 7.29 – 7.22 (m, 3H), 7.20 – 7.16 (m, 2H), 7.14 – 7.11 (m, 2H), 6.40 (d,  $J = 15.7$  Hz, 1H), 5.90 (dt,  $J = 15.4, 7.5$  Hz, 1H), 4.26 (q,  $J = 7.1$  Hz, 2H), 3.27 (s, 2H), 3.24 – 3.10 (m, 2H), 1.28 (t,  $J = 7.1$  Hz, 3H).

**$^{13}\text{C}\{^1\text{H}\}$  NMR** (101 MHz, Acetone- $d_6$ )  $\delta$  181.2, 165.6, 157.0, 145.6, 137.2, 135.2, 134.1, 133.9, 133.7, 132.4, 132.2, 129.3, 129.0, 128.9, 128.5, 127.4, 127.3, 126.1, 124.0, 121.5, 86.2, 84.7, 61.7, 55.1, 46.6, 44.1, 32.8, 14.6.

**HRMS** (ESI) Calculated for  $\text{C}_{31}\text{H}_{25}^{79}\text{BrO}_3$  ( $[\text{M}] + \text{Na}^+$ ) = 547.0879, Found 547.0879.

**HRMS** (ESI) Calculated for  $\text{C}_{31}\text{H}_{25}^{81}\text{BrO}_3$  ( $[\text{M}] + \text{Na}^+$ ) = 549.0859, Found 549.0861.

**IR** (neat) 2982, 2926, 1735, 1663, 1601, 1487, 1454, 1379, 1276, 1232, 1162, 1138, 1087, 1073, 1010, 967, 929, 853, 814, 759, 692, 636, 525  $\text{cm}^{-1}$ .

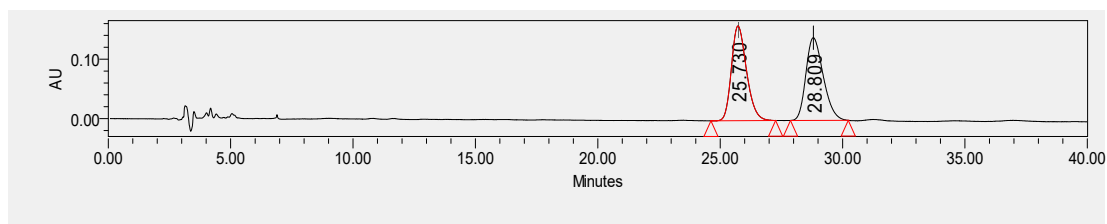

|   | Retention Time | Area    | % Area |
|---|----------------|---------|--------|
| 1 | 25.730         | 6826483 | 49.88  |
| 2 | 28.809         | 6860189 | 50.12  |

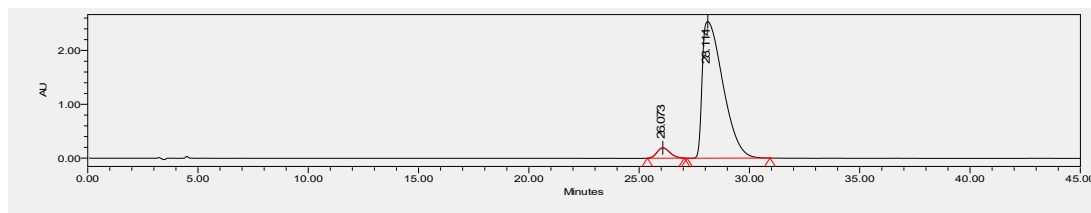

|   | Retention Time | Area      | % Area |
|---|----------------|-----------|--------|
| 1 | 26.073         | 7787519   | 4.50   |
| 2 | 28.114         | 165290709 | 95.50  |

**Ethyl (R,E)-4-(3-(4-chlorophenyl)allyl)-1-oxo-4-(3-phenylprop-2-yn-1-yl)-1,4-dihydronaphthalene-2-carboxylate (B24)**

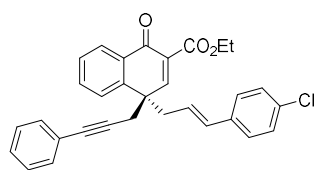

White solid, Mp: 43–46 °C, 81% yield, 92% *ee*;  $[\alpha]^{14.0} = -20.9$  ( $c = 0.72$  in  $\text{CH}_2\text{Cl}_2$ ,  $\lambda = 589$  nm).

**HPLC:** Daicel chiralcel ID, *n*-hexane/*i*-PrOH = 90/10, 1.0 mL/min,  $\lambda = 224$  nm,  $t_{R(\text{minor})} = 24.06$  min,  $t_{R(\text{major})} = 26.78$  min.

**$^1\text{H}$  NMR** (400 MHz, Acetone- $d_6$ )  $\delta$  8.11 (dd,  $J = 7.8, 1.4$  Hz, 1H), 7.92 (dd,  $J = 8.1, 1.2$  Hz, 1H), 7.78 – 7.72 (m, 2H), 7.48 (td,  $J = 8.1, 1.2$  Hz, 1H), 7.28 – 7.16 (m, 9H), 6.41 (d,  $J = 15.8$  Hz, 1H), 5.88 (dt,  $J = 15.5, 7.5$  Hz, 1H), 4.27 (q,  $J = 7.1$  Hz, 2H), 3.28 (s, 2H), 3.25 – 3.10 (m, 2H), 1.28 (t,  $J = 7.1$  Hz, 3H).

**$^{13}\text{C}\{^1\text{H}\}$  NMR** (101 MHz, Acetone- $d_6$ )  $\delta$  181.2, 165.6, 157.0, 145.6, 136.8, 135.2, 134.1, 133.9, 133.7, 133.4, 132.2, 129.5, 129.3, 129.0, 128.6, 128.5, 127.4, 127.3, 126.0, 124.1, 86.2, 84.7, 61.7, 46.6, 44.0, 32.8, 14.6.

**HRMS** (ESI) Calculated for  $\text{C}_{31}\text{H}_{25}\text{ClO}_3$  ( $[\text{M}] + \text{Na}^+$ ) = 503.1384, Found 503.1386.

**IR** (neat) 2982, 1736, 1665, 1600, 1490, 1454, 1379, 1277, 1232, 1162, 1138, 1090, 1014, 968, 929, 816, 759, 692, 528  $\text{cm}^{-1}$ .

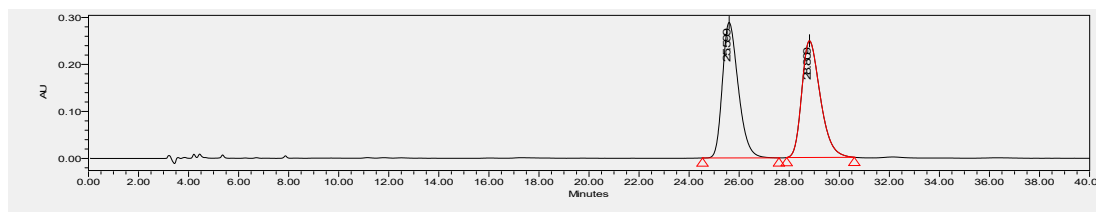

|   | Retention Time | Area     | % Area |
|---|----------------|----------|--------|
| 1 | 25.599         | 12736390 | 49.96  |
| 2 | 28.809         | 12756652 | 50.04  |

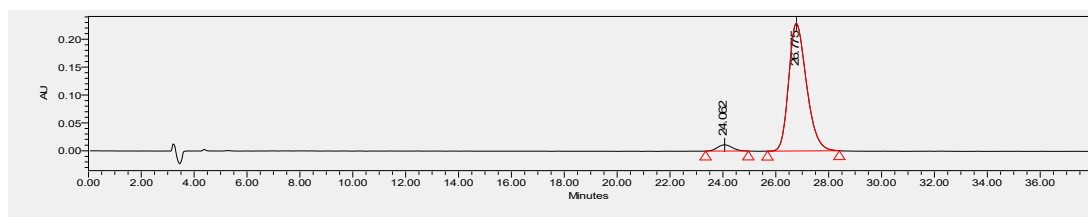

|   | Retention Time | Area     | % Area |
|---|----------------|----------|--------|
| 1 | 24.062         | 439704   | 3.95   |
| 2 | 26.775         | 10689853 | 96.05  |

**Ethyl (R,E)-1-oxo-4-(3-phenylprop-2-yn-1-yl)-4-(3-(p-tolyl)allyl)-1,4-dihydronaphthalene-2-carboxylate (B25)**

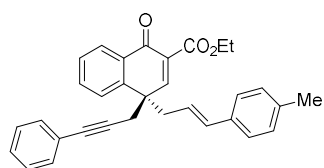

White solid, Mp: 40–43 °C, 81% yield, 81% *ee*;  $[\alpha]^{14.0} = -16.4$  ( $c = 0.72$  in  $\text{CH}_2\text{Cl}_2$ ,  $\lambda = 589$  nm).

**HPLC:** Daicel chiralcel ID, *n*-hexane/*i*-PrOH = 90/10, 1.0 mL/min,  $\lambda = 224$  nm,  $t_{R(\text{minor})} = 21.50$  min,  $t_{R(\text{major})} = 22.61$  min.

**$^1\text{H}$  NMR** (400 MHz, Acetone- $d_6$ )  $\delta$  8.11 (dd,  $J = 7.9, 1.5$  Hz, 1H), 7.91 (dd,  $J = 8.1, 1.1$  Hz, 1H), 7.77 (s, 1H), 7.74 (td,  $J = 7.7, 1.5$  Hz, 1H), 7.50 – 7.46 (m, 1H), 7.29 – 7.23 (m, 3H), 7.20 – 7.16 (m, 2H), 7.07 – 7.00 (m, 4H), 6.37 (d,  $J = 15.7$  Hz, 1H), 5.78 (dt,  $J = 15.4, 7.4$  Hz, 1H), 4.27 (q,  $J = 7.1$  Hz, 2H), 3.28 – 3.25 (m, 2H), 3.23 – 3.08 (m, 2H), 2.22 (s, 3H), 1.29 (t,  $J = 7.1$  Hz, 3H).

**$^{13}\text{C}\{^1\text{H}\}$  NMR** (101 MHz, Acetone- $d_6$ )  $\delta$  181.2, 165.6, 157.2, 145.7, 138.0, 135.2, 135.1, 134.9, 134.0, 133.9, 132.2, 130.0, 129.3, 129.0, 128.4, 127.4, 127.3, 126.9, 124.1, 123.7, 86.3, 84.7, 61.7, 46.7, 44.2, 32.8, 32.4, 21.2, 14.6.

**HRMS** (ESI) Calculated for  $\text{C}_{32}\text{H}_{28}\text{O}_3$  ( $[\text{M}] + \text{Na}^+$ ) = 483.1931, Found 483.1930.

**IR** (neat) 2981, 1735, 1665, 1601, 1512, 1490, 1454, 1379, 1276, 1232, 1162, 1138, 1087, 1020, 968, 929, 803, 759, 692, 641, 526  $\text{cm}^{-1}$ .

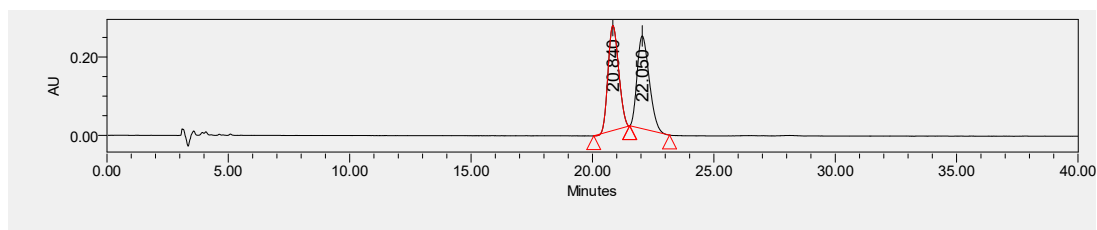

|   | Retention Time | Area    | % Area |
|---|----------------|---------|--------|
| 1 | 20.840         | 8200281 | 49.96  |
| 2 | 22.050         | 8212246 | 50.04  |

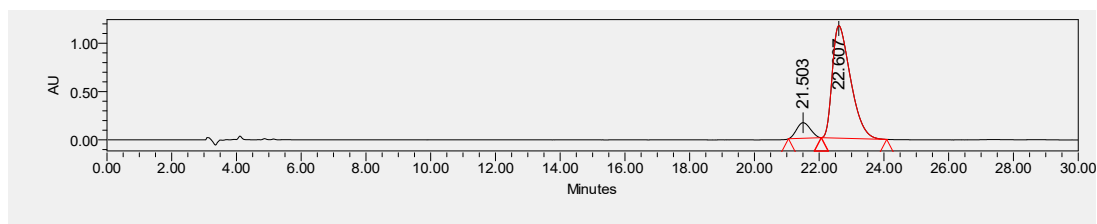

|   | Retention Time | Area     | % Area |
|---|----------------|----------|--------|
| 1 | 21.503         | 4727308  | 9.42   |
| 2 | 22.607         | 45467170 | 90.58  |

**Ethyl (R,E)-4-(3-(4-methoxyphenyl)allyl)-1-oxo-4-(3-phenylprop-2-yn-1-yl)-1,4-dihydronaphthalene-2-carboxylate (B26)**

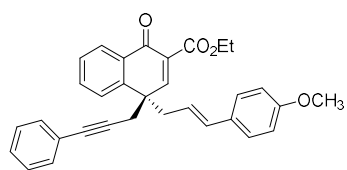

Colorless oil, 45% yield, 39% *ee*;  $[\alpha]^{14.1} = -3.8$  ( $c = 0.39$  in  $\text{CH}_2\text{Cl}_2$ ,  $\lambda = 589$  nm).

**HPLC:** Daicel chiralcel ODH, *n*-hexane/*i*-PrOH = 80/20, 1.0 mL/min,  $\lambda = 224$  nm,  $t_{R(\text{minor})} = 30.85$  min,  $t_{R(\text{major})} = 23.84$  min.

**$^1\text{H}$  NMR**  $^1\text{H}$  NMR (400 MHz, Acetone- $d_6$ )  $\delta$  8.11 (ddd,  $J = 7.9, 1.4, 0.6$  Hz, 1H), 7.91 (dt,  $J = 7.9, 0.9$  Hz, 1H), 7.76 (s, 1H), 7.76 – 7.72 (m, 1H), 7.48 (ddd,  $J = 8.2, 7.3, 1.1$  Hz, 1H), 7.29 – 7.22 (m, 3H), 7.20 – 7.16 (m, 2H), 7.12 – 7.08 (m, 2H), 6.79 – 6.75 (m, 2H), 6.35 (d,  $J = 15.8$  Hz, 1H), 5.73 – 5.65 (m, 1H), 4.27 (q,  $J = 7.1$  Hz, 2H), 3.72 (s, 3H), 3.27 (s, 2H), 3.22 – 3.07 (m, 2H), 1.29 (t,  $J = 7.1$  Hz, 3H).

**$^{13}\text{C}\{^1\text{H}\}$  NMR** (101 MHz, Acetone- $d_6$ )  $\delta$  181.3, 165.6, 160.3, 157.3, 145.8, 135.1, 134.5, 134.0, 133.9, 132.3, 130.6, 129.3, 129.0, 128.4, 128.2, 127.5, 127.3, 124.1, 122.4, 114.8, 86.3, 84.7, 61.7, 55.6, 46.8, 44.2, 32.7, 14.6.

**HRMS** (ESI) Calculated for  $\text{C}_{32}\text{H}_{28}\text{O}_4$  ( $[\text{M}] + \text{Na}^+$ ) = 499.1880, Found 499.1879.

**IR** (neat) 2933, 1736, 1665, 1605, 1511, 1490, 1456, 1379, 1277, 1249, 1176, 1138, 1087, 1030, 967, 930, 840, 759, 693, 527  $\text{cm}^{-1}$ .

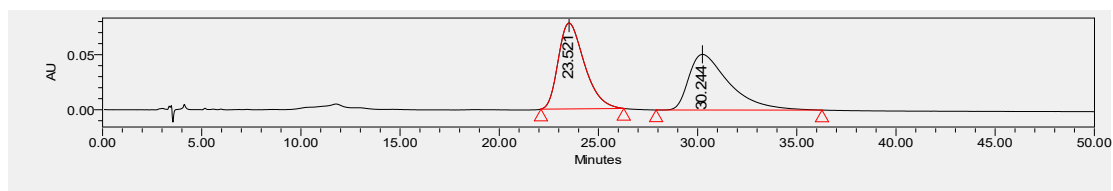

|   | Retention Time | Area    | % Area |
|---|----------------|---------|--------|
| 1 | 23.521         | 7138349 | 50.01  |
| 2 | 30.244         | 7135055 | 49.99  |

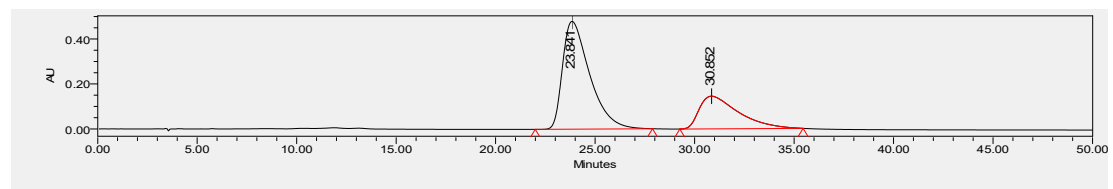

|   | Retention Time | Area     | % Area |
|---|----------------|----------|--------|
| 1 | 23.841         | 45483502 | 69.48  |
| 2 | 30.852         | 19978327 | 30.52  |



**Ethyl (R,E)-4-(3-(3-chlorophenyl)allyl)-1-oxo-4-(3-phenylprop-2-yn-1-yl)-1,4-dihydronaphthalene-2-carboxylate (B27)**

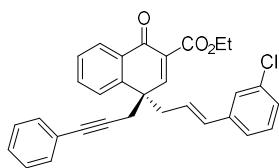

White solid, Mp: 102–105 °C, 84% yield, 95% *ee*;  $[\alpha]^{13.8} = -28.5$  ( $c = 0.66$  in  $\text{CH}_2\text{Cl}_2$ ,  $\lambda = 589$  nm).

**HPLC:** Daicel chiralcel ODH, *n*-hexane/*i*-PrOH = 80/20, 1.0 mL/min,  $\lambda = 224$  nm,  $t_{R(\text{minor})} = 12.05$  min,  $t_{R(\text{major})} = 23.07$  min.

**$^1\text{H}$  NMR** (400 MHz, Acetone- $d_6$ )  $\delta$  8.11 (dd,  $J = 7.9, 1.5$  Hz, 1H), 7.93 (dd,  $J = 8.0, 1.1$  Hz, 1H), 7.78 (s, 1H), 7.77 – 7.72 (m, 1H), 7.49 (ddd,  $J = 8.2, 7.3, 1.1$  Hz, 1H), 7.29 – 7.24 (m, 3H), 7.23 – 7.20 (m, 2H), 7.18 (ddd,  $J = 6.6, 3.5, 1.8$  Hz, 3H), 7.12 (dt,  $J = 7.6, 1.5$  Hz, 1H), 6.41 (d,  $J = 15.7$  Hz, 1H), 5.95 (dd,  $J = 15.6, 7.6$  Hz, 1H), 4.27 (q,  $J = 7.1$  Hz, 2H), 3.28 (d,  $J = 2.2$  Hz, 2H), 3.26 – 3.12 (m, 2H), 1.29 (t,  $J = 7.1$  Hz, 3H).

**$^{13}\text{C}\{^1\text{H}\}$  NMR** (101 MHz, Acetone- $d_6$ )  $\delta$  181.2, 165.6, 156.9, 145.5, 140.2, 135.2, 134.9, 134.1, 133.9, 133.6, 132.2, 131.1, 129.3, 129.0, 128.5, 128.1, 127.5, 127.4, 127.0, 126.8, 125.5, 124.1, 86.2, 84.7, 61.7, 46.6, 44.0, 32.8, 14.6.

**HRMS** (ESI) Calculated for  $\text{C}_{31}\text{H}_{25}\text{ClO}_3$  ( $[\text{M}] + \text{Na}^+$ ) = 503.1384, Found 503.1383.

**IR** (neat) 2982, 1736, 1665, 1598, 1567, 1489, 1454, 1380, 1277, 1232, 1162, 1138, 1086, 1020, 966, 928, 759, 692, 528  $\text{cm}^{-1}$ .

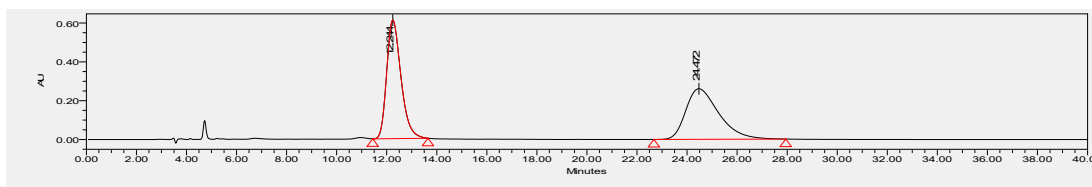

|   | Retention Time | Area     | % Area |
|---|----------------|----------|--------|
| 1 | 12.244         | 24181368 | 50.29  |
| 2 | 24.472         | 23900032 | 49.71  |

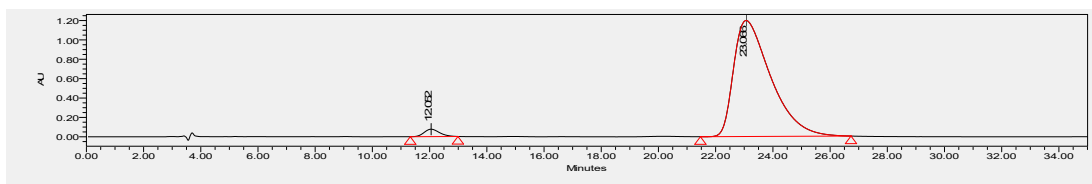

|   | Retention Time | Area      | % Area |
|---|----------------|-----------|--------|
| 1 | 12.052         | 2860647   | 2.58   |
| 2 | 23.066         | 108056165 | 97.42  |

**Ethyl (R,E)-1-oxo-4-(3-phenylprop-2-yn-1-yl)-4-(3-(m-tolyl)allyl)-1,4-dihydronaphthalene-2-carboxylate (B28)**

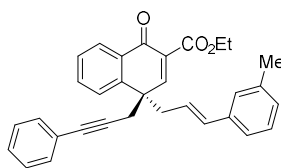

White solid, Mp: 93–96 °C, 89% yield, 90% *ee*;  $[\alpha]^{13.8} = -20.0$  ( $c = 0.74$  in  $\text{CH}_2\text{Cl}_2$ ,  $\lambda = 589$  nm).

**HPLC:** Daicel chiralcel ODH, *n*-hexane/*i*-PrOH = 80/20, 1.0 mL/min,  $\lambda = 224$  nm,  $t_{R(\text{minor})} = 11.85$  min,  $t_{R(\text{major})} = 16.93$  min.

**$^1\text{H}$  NMR** (400 MHz, Acetone- $d_6$ )  $\delta$  8.11 (dd,  $J = 7.9, 1.5$  Hz, 1H), 7.92 (dd,  $J = 7.9, 1.1$  Hz, 1H), 7.78 (s, 1H), 7.76 – 7.72 (m, 1H), 7.48 (ddd,  $J = 8.2, 7.3, 1.1$  Hz, 1H), 7.29 – 7.23 (m, 3H), 7.21 – 7.16 (m, 2H), 7.08 (t,  $J = 7.5$  Hz, 1H), 7.00 – 6.94 (m, 3H), 6.38 (d,  $J = 15.8$  Hz, 1H), 5.85 (dd,  $J = 15.5, 7.7$  Hz, 1H), 4.27 (q,  $J = 7.1$  Hz, 2H), 3.27 (s, 2H), 3.25 – 3.10 (m, 2H), 2.21 (s, 3H), 1.29 (t,  $J = 7.1$  Hz, 3H).

**$^{13}\text{C}\{^1\text{H}\}$  NMR** (101 MHz, Acetone- $d_6$ )  $\delta$  181.3, 165.6, 157.2, 145.7, 138.8, 137.9, 135.2, 135.1, 134.0, 133.9, 132.2, 129.3, 129.3, 129.0, 129.0, 128.4, 127.7, 127.5, 127.3, 124.6, 124.2, 124.1, 86.2, 84.7, 61.7, 46.7, 44.2, 32.9, 21.4, 14.6.

**HRMS** (ESI) Calculated for  $\text{C}_{32}\text{H}_{28}\text{O}_3$  ( $[\text{M}]+\text{Na}^+$ ) = 483.1931, Found 483.1929.

**IR** (neat) 2982, 2361, 2160, 1736, 1666, 1601, 1489, 1454, 1379, 1276, 1232, 1162, 1138, 1087, 1019, 967, 927, 759, 692, 528  $\text{cm}^{-1}$ .

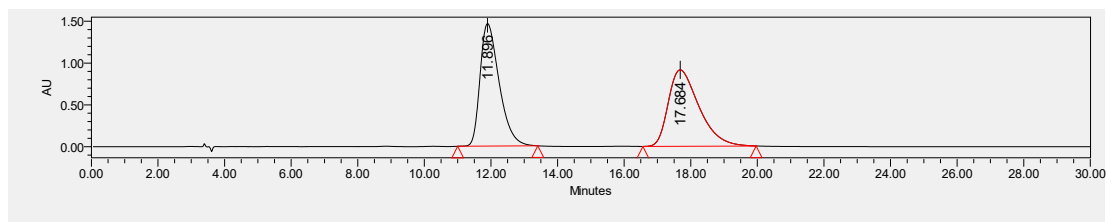

|   | Retention Time | Area     | % Area |
|---|----------------|----------|--------|
| 1 | 11.896         | 58454374 | 50.00  |
| 2 | 17.684         | 58454728 | 50.00  |

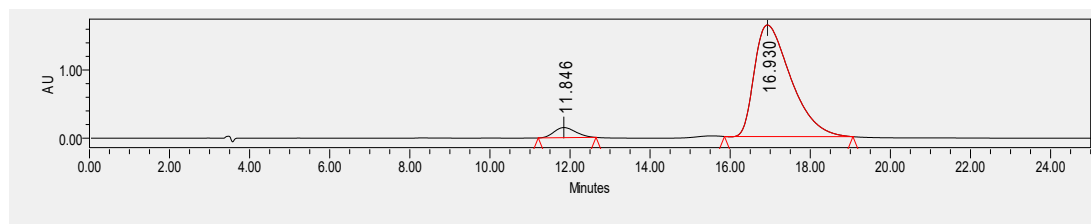

|   | Retention Time | Area      | % Area |
|---|----------------|-----------|--------|
| 1 | 11.846         | 5650913   | 5.17   |
| 2 | 16.930         | 103617955 | 94.83  |

**Ethyl (R,E)-4-(3-(2-chlorophenyl)allyl)-1-oxo-4-(3-phenylprop-2-yn-1-yl)-1,4-dihydronaphthalene-2-carboxylate (B29)**

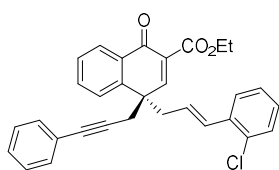

White solid, Mp: 31–34 °C, 40% yield, 96% *ee*;  $[\alpha]^{14.0} = -29.2$  ( $c = 0.37$  in  $\text{CH}_2\text{Cl}_2$ ,  $\lambda = 589$  nm).

**HPLC:** Daicel chiralcel ODH, *n*-hexane/*i*-PrOH = 80/20, 1.0 mL/min,  $\lambda = 224$  nm,  $t_{R(\text{minor})} = 11.89$  min,  $t_{R(\text{major})} = 16.52$  min.

**$^1\text{H}$  NMR** (400 MHz, Acetone- $d_6$ )  $\delta$  8.11 (dd,  $J = 7.9, 1.5$  Hz, 1H), 7.96 (dd,  $J = 8.0, 1.1$  Hz, 1H), 7.80 (s, 1H), 7.75 (ddd,  $J = 8.1, 7.3, 1.5$  Hz, 1H), 7.49 (ddd,  $J = 8.2, 7.3, 1.1$  Hz, 1H), 7.31 – 7.24 (m, 5H), 7.20 – 7.15 (m, 4H), 6.71 (d,  $J = 15.7$  Hz, 1H), 5.89 – 5.82 (m, 1H), 4.26 (t,  $J = 7.1$  Hz, 2H), 3.32 – 3.19 (m, 4H), 1.29 (d,  $J = 7.1$  Hz, 3H).

**$^{13}\text{C}\{^1\text{H}\}$  NMR**  $^{13}\text{C}$  NMR (101 MHz, Acetone- $d_6$ )  $\delta$  181.3 , 165.5 , 157.1 , 145.5 , 136.0 , 135.2 , 134.1 , 133.9 , 133.1 , 132.3 , 131.0 , 130.3 , 129.8 , 129.3 , 129.0 , 128.5 , 128.5 , 128.1 , 127.9 , 127.5 , 127.4 , 124.1 , 86.2 , 84.8 , 61.7 , 46.7 , 44.0 , 32.9 , 14.6 .

**HRMS** (ESI) Calculated for  $\text{C}_{31}\text{H}_{25}\text{ClO}_3$  ( $[\text{M}] + \text{Na}^+$ ) = 503.1384, Found 503.1382 .

**IR** (neat) 2982, 1736, 1665, 1601, 1490, 1470, 1441, 1379, 1276, 1232, 1162, 1138, 1087, 1021, 967, 929, 693, 528  $\text{cm}^{-1}$ .

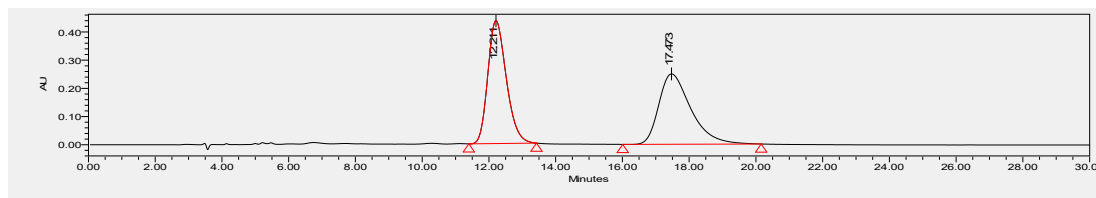

|   | Retention Time | Area     | % Area |
|---|----------------|----------|--------|
| 1 | 12.211         | 16780639 | 50.20  |
| 2 | 17.473         | 16648726 | 49.80  |

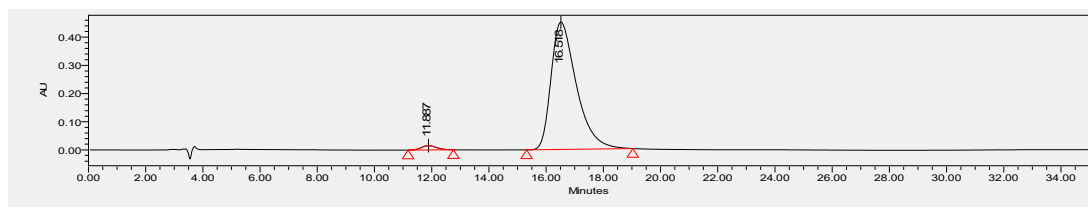

|   | Retention Time | Area     | % Area |
|---|----------------|----------|--------|
| 1 | 11.887         | 566875   | 2.00   |
| 2 | 16.518         | 27803693 | 98.00  |

**Ethyl (R,E)-1-oxo-4-(3-phenylprop-2-yn-1-yl)-4-(3-(*o*-tolyl)allyl)-1,4-dihydronaphthalene-2-carboxylate (B30)**

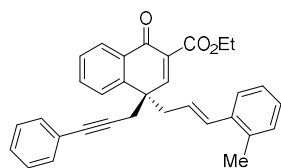

White solid, Mp: 33–36 °C, 72% yield, 93% *ee*;  $[\alpha]^{14.2} = -26.6$  ( $c = 0.56$  in  $\text{CH}_2\text{Cl}_2$ ,  $\lambda = 589$  nm).

**HPLC:** Daicel chiralcel ODH, *n*-hexane/*i*-PrOH = 80/20, 1.0 mL/min,  $\lambda = 224$  nm,  $t_{R(\text{minor})} = 11.01$  min,  $t_{R(\text{major})} = 14.94$  min.

**$^1\text{H}$  NMR** (400 MHz, Acetone- $d_6$ )  $\delta$  8.10 (dd,  $J = 7.9, 1.5$  Hz, 1H), 7.95 (dd,  $J = 8.0, 1.1$  Hz, 1H), 7.80 (s, 1H), 7.78 – 7.73 (m, 1H), 7.48 (ddd,  $J = 8.1, 7.3, 1.1$  Hz, 1H), 7.29 – 7.23 (m, 3H), 7.21 – 7.16 (m, 2H), 7.10 – 7.07 (m, 1H), 7.05 – 6.98 (m, 3H), 6.58 (d,  $J = 15.6$  Hz, 1H), 5.67 – 5.60 (m, 1H), 4.27 (q,  $J = 7.1$  Hz, 2H), 3.29 (s, 2H), 3.27 – 3.12 (m, 2H), 2.11 (s, 3H), 1.29 (t,  $J = 7.1$  Hz, 3H).

**$^{13}\text{C}\{^1\text{H}\}$  NMR** (101 MHz, Acetone- $d_6$ )  $\delta$  181.3, 165.6, 157.3, 145.7, 137.3, 135.9, 135.2, 134.0, 134.0, 133.4, 132.3, 130.9, 129.3, 129.0, 128.4, 128.2, 127.5, 127.3, 126.9, 126.5, 126.4, 124.1, 86.2, 84.7, 61.7, 46.9, 44.3, 32.8, 19.8, 14.6.

**HRMS** (ESI) Calculated for  $\text{C}_{32}\text{H}_{28}\text{O}_3$  ( $[\text{M}]+\text{Na}^+$ ) = 483.1931, Found 483.1929.

**IR** (neat) 2981, 1736, 1665, 1601, 1488, 1455, 1379, 1277, 1232, 1162, 1138, 1087, 1020, 967, 929, 756, 692, 528  $\text{cm}^{-1}$ .

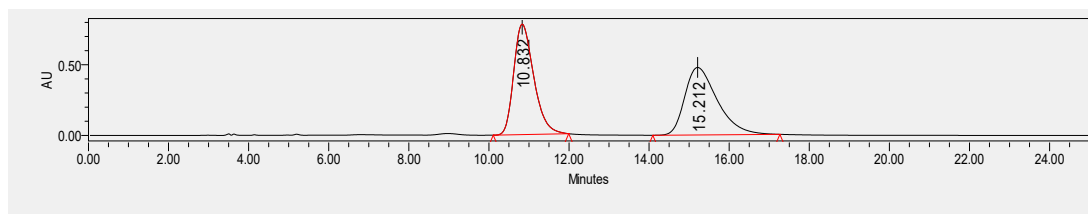

|   | Retention Time | Area     | % Area |
|---|----------------|----------|--------|
| 1 | 10.832         | 27190118 | 50.20  |
| 2 | 15.212         | 26973053 | 49.80  |

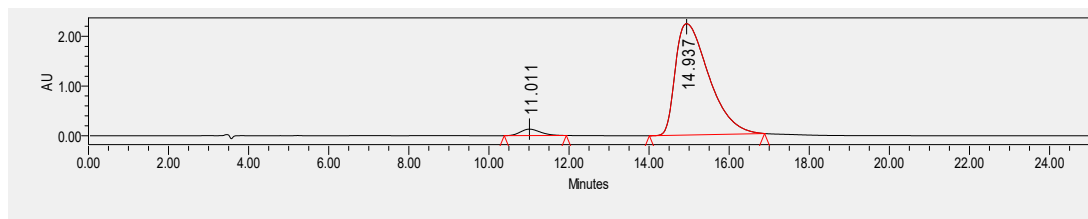

|   | Retention Time | Area      | % Area |
|---|----------------|-----------|--------|
| 1 | 11.011         | 4526312   | 3.36   |
| 2 | 14.937         | 130116361 | 96.64  |

**Ethyl (R,E)-4-(3-(2-methoxyphenyl)allyl)-1-oxo-4-(3-phenylprop-2-yn-1-yl)-1,4-dihydronaphthalene-2-carboxylate (B31)**

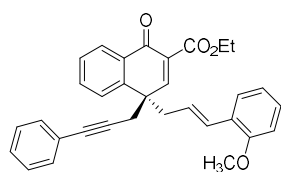

White solid, Mp: 36–39 °C, 78% yield, 92% *ee*;  $[\alpha]^{14.2} = -19.5$  ( $c = 0.70$  in  $\text{CH}_2\text{Cl}_2$ ,  $\lambda = 589$  nm).

**SFC Chiralcel BYPASS**,  $\text{CO}_2/\text{MeOH} = 90/10$ , 1.5 mL/min,  $\lambda = 224$  nm,  $t_{\text{R}}(\text{minor}) = 15.68$  min,  $t_{\text{R}}(\text{major}) = 17.46$  min

**$^1\text{H}$  NMR** (400 MHz, Acetone- $d_6$ )  $\delta$  8.12 (dd,  $J = 7.9, 1.5$  Hz, 1H), 7.92 (dd,  $J = 8.0, 1.1$  Hz, 1H), 7.78 (s, 1H), 7.74 (ddd,  $J = 8.1, 7.3, 1.5$  Hz, 1H), 7.48 (ddd,  $J = 8.2, 7.4, 1.1$  Hz, 1H), 7.29 – 7.23 (m, 3H), 7.21 – 7.16 (m, 2H), 7.15 – 7.10 (m, 2H), 6.87 (d,  $J = 8.1$  Hz, 1H), 6.77 (td,  $J = 7.4, 1.1$  Hz, 1H), 6.64 (d,  $J = 15.9$  Hz, 1H), 5.87 – 5.79 (m, 1H), 4.27 (q,  $J = 7.1$  Hz, 2H), 3.74 (s, 3H), 3.28 (s, 2H), 3.24 – 3.10 (m, 2H), 1.29 (t,  $J = 7.1$  Hz, 3H).

**$^{13}\text{C}\{^1\text{H}\}$  NMR** (101 MHz, Acetone- $d_6$ )  $\delta$  181.3, 165.6, 157.5, 157.3, 145.8, 135.1, 134.0, 133.9, 132.2, 129.8, 129.5, 129.3, 129.0, 128.4, 127.5, 127.4, 127.3, 126.7, 125.4, 124.1, 121.4, 112.0, 86.3, 84.7, 61.7, 55.8, 46.8, 44.6, 32.7, 14.6.

**HRMS** (ESI) Calculated for  $\text{C}_{32}\text{H}_{28}\text{O}_4$  ( $[\text{M}] + \text{Na}^+$ ) = 499.1880, Found 499.1877.

**IR** (neat) 2936, 2837, 1736, 1665, 1599, 1489, 1459, 1379, 1276, 1244, 1180, 1162, 1138, 1087, 1049, 1025, 972, 929, 693, 528  $\text{cm}^{-1}$ .

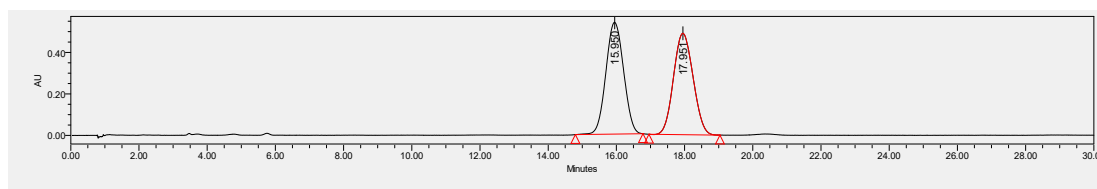

|   | Retention Time | Area     | % Area |
|---|----------------|----------|--------|
| 1 | 15.950         | 19431438 | 49.99  |
| 2 | 17.951         | 19442131 | 50.01  |

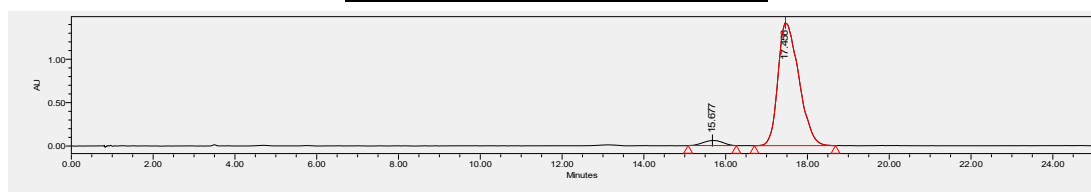

|   | Retention Time | Area     | % Area |
|---|----------------|----------|--------|
| 1 | 15.677         | 1941932  | 3.74   |
| 2 | 17.456         | 50042543 | 96.26  |

**Ethyl (R,E)-4-(3-(naphthalen-1-yl)allyl)-1-oxo-4-(3-phenylprop-2-yn-1-yl)-1,4-dihydronaphthalene-2-carboxylate (B32)**

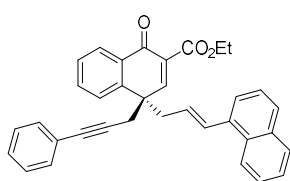

Colorless oil, 94% yield, 95% *ee*;  $[\alpha]^{14.1} = -32.0$  ( $c = 0.82$  in  $\text{CH}_2\text{Cl}_2$ ,  $\lambda = 589$  nm).

**HPLC:** Daicel chiralcel ODH, *n*-hexane/*i*-PrOH = 80/20, 1.0 mL/min,  $\lambda = 224$  nm,  $t_{R(\text{minor})} = 20.31$  min,  $t_{R(\text{major})} = 42.88$  min.

**$^1\text{H}$  NMR**  $^1\text{H}$  NMR (400 MHz, Acetone- $d_6$ )  $\delta$  8.12 (dd,  $J = 7.9, 1.5$  Hz, 1H), 8.01 (dd,  $J = 8.0, 1.1$  Hz, 1H), 7.88 (s, 1H), 7.85 – 7.72 (m, 4H), 7.52 – 7.43 (m, 3H), 7.33 (t,  $J = 7.6$  Hz, 1H), 7.30 – 7.23 (m, 4H), 7.21 (dq,  $J = 4.5, 2.6$  Hz, 2H), 7.12 (d,  $J = 15.5$  Hz, 1H), 5.79 (dt,  $J = 15.3, 7.5$  Hz, 1H), 4.27 (q,  $J = 7.1$  Hz, 2H), 3.39 – 3.24 (m, 4H), 1.27 (t,  $J = 7.1$  Hz, 3H).

**$^{13}\text{C}\{^1\text{H}\}$  NMR** (101 MHz, Acetone- $d_6$ )  $\delta$  181.3, 165.6, 157.3, 145.7, 135.9, 135.3, 134.5, 134.1, 134.0, 132.8, 132.3, 131.9, 129.3, 129.2, 129.0, 128.6, 128.4, 128.4, 127.6, 127.4, 126.9, 126.7, 126.5, 124.8, 124.6, 124.1, 86.2, 84.8, 61.7, 55.1, 46.9, 44.3, 32.8, 14.6.

**HRMS** (ESI) Calculated for  $\text{C}_{35}\text{H}_{28}\text{O}_3$  ( $[\text{M}] + \text{Na}^+$ ) = 519.1931, Found 519.1933.

**IR** (neat) 3060, 2982, 1735, 1664, 1601, 1490, 1454, 1379, 1277, 1232, 1162, 1138, 1087, 968, 928, 862, 759, 692, 528  $\text{cm}^{-1}$ .

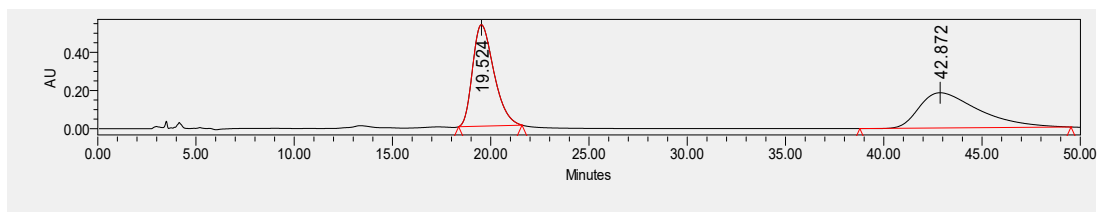

|   | Retention Time | Area     | % Area |
|---|----------------|----------|--------|
| 1 | 19.524         | 39959525 | 50.68  |
| 2 | 42.872         | 38885134 | 49.32  |

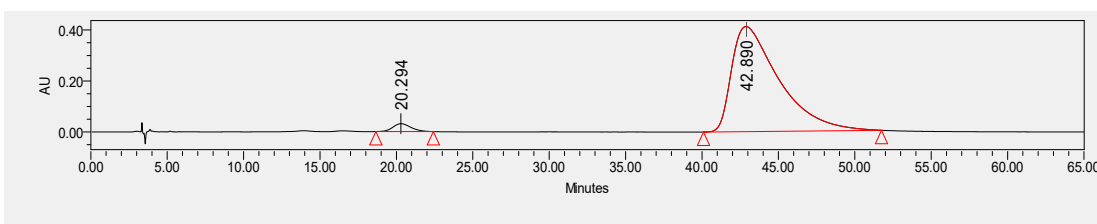

|   | Retention Time | Area     | % Area |
|---|----------------|----------|--------|
| 1 | 20.307         | 2789580  | 2.74   |
| 2 | 42.877         | 99126450 | 97.26  |

**Ethyl (R,E)-1-oxo-4-(3-phenylprop-2-yn-1-yl)-4-(3-(thiophen-2-yl)allyl)-1,4-dihydronaphthalene-2-carboxylate (B33)**

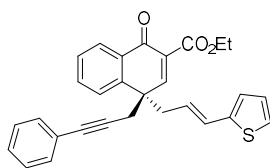

Colorless oil, 45% yield, 43% *ee*;  $[\alpha]^{13.9} = -13.6$  ( $c = 0.39$  in  $\text{CH}_2\text{Cl}_2$ ,  $\lambda = 589$  nm).

**HPLC:** Daicel chiralcel ODH, *n*-hexane/*i*-PrOH = 80/20, 1.0 mL/min,  $\lambda = 224$  nm,  $t_{R(\text{minor})} = 14.25$  min,  $t_{R(\text{major})} = 18.18$  min.

**$^1\text{H}$  NMR** (400 MHz, Acetone- $d_6$ )  $\delta$  8.11 (dd,  $J = 7.9, 1.6$  Hz, 1H), 7.93 – 7.90 (m, 1H), 7.76 – 7.72 (m, 2H), 7.51 – 7.47 (m, 1H), 7.28 – 7.24 (m, 3H), 7.21 – 7.15 (m, 3H), 6.88 (dd,  $J = 5.1, 3.5$  Hz, 1H), 6.84 – 6.81 (m, 1H), 6.56 (d,  $J = 15.5$  Hz, 1H), 5.62 (dt,  $J = 15.3, 7.5$  Hz, 1H), 4.27 (d,  $J = 7.1$  Hz, 2H), 3.26 (s, 2H), 3.21 (td,  $J = 7.5, 7.0, 1.3$  Hz, 1H), 3.14 – 3.07 (m, 1H), 1.29 (t,  $J = 7.1$  Hz, 3H).

**$^{13}\text{C}$  NMR** (101 MHz, Acetone- $d_6$ )  $\delta$  181.2, 165.6, 157.0, 145.5, 142.7, 134.1, 133.9, 132.2, 129.3, 129.0, 128.5, 128.3, 128.1, 127.4, 127.4, 126.4, 125.1, 124.4, 124.1, 86.2, 84.7, 61.7, 46.7, 43.9, 32.8, 14.6.

**HRMS** (ESI) Calculated for  $\text{C}_{29}\text{H}_{24}\text{O}_3\text{S}$  ( $[\text{M}]+\text{Na}^+$ ) = 475.1338, Found 475.1338.

**IR** (neat) 2984, 1735, 1665, 1601, 1490, 1454, 1380, 1277, 1232, 1161, 1138, 1087, 1019, 957, 929, 854, 759, 693, 528  $\text{cm}^{-1}$ .

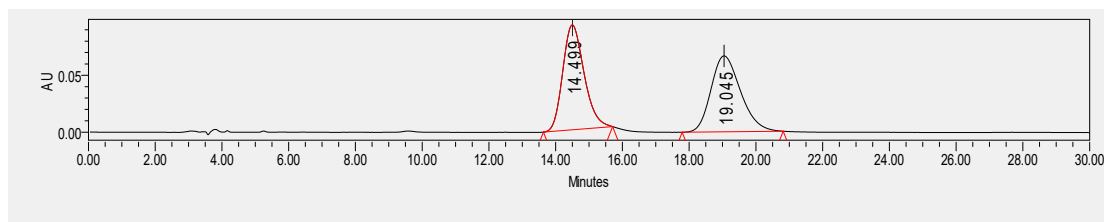

|   | Retention Time | Area    | % Area |
|---|----------------|---------|--------|
| 1 | 14.499         | 4097664 | 49.96  |
| 2 | 19.045         | 4104119 | 50.04  |

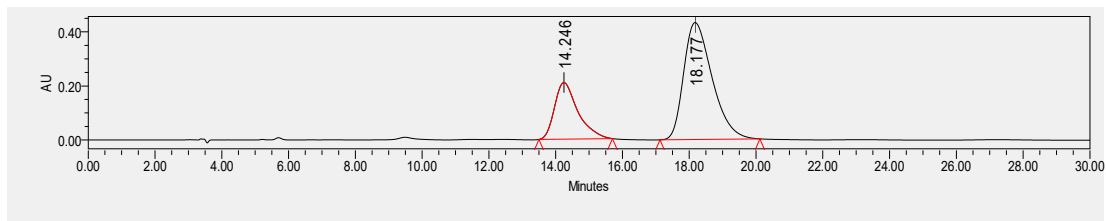

|   | Retention Time | Area     | % Area |
|---|----------------|----------|--------|
| 1 | 14.246         | 10156754 | 28.42  |
| 2 | 18.177         | 25585604 | 71.58  |

**Ethyl (R,E)-4-(4-ethoxy-4-oxobut-2-en-1-yl)-1-oxo-4-(3-phenylprop-2-yn-1-yl)-1,4-dihydronaphthalene-2-carboxylate (B34)**

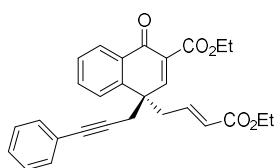

Colorless oil, 51% yield, 85% *ee*;  $[\alpha]^{14.1} = -57.9$  ( $c = 0.43$  in  $\text{CH}_2\text{Cl}_2$ ,  $\lambda = 589$  nm).

**HPLC:** Daicel chiralcel ID, *n*-hexane/*i*-PrOH = 95/5, 1.0 mL/min,  $\lambda = 224$  nm,  $t_{R(\text{minor})} = 122.40$  min,  $t_{R(\text{major})} = 140.72$  min.

**$^1\text{H}$  NMR** (400 MHz, Acetone- $d_6$ )  $\delta$  8.14 (dd,  $J = 7.9, 1.2$  Hz, 1H), 7.91 (dt,  $J = 8.0, 0.9$  Hz, 1H), 7.78 – 7.73 (m, 1H), 7.73 (s, 1H), 7.52 (ddd,  $J = 7.9, 7.1, 1.0$  Hz, 1H), 7.29 – 7.23 (m, 3H), 7.21 – 7.16 (m, 2H), 6.44 (dt,  $J = 15.4, 7.6$  Hz, 1H), 5.84 (dt,  $J = 15.5, 1.4$  Hz, 1H), 4.28 (q,  $J = 7.1$  Hz, 2H), 4.01 (qd,  $J = 7.1, 0.7$  Hz, 2H), 3.36 (ddd,  $J = 14.4, 7.7, 1.4$  Hz, 1H), 3.26 (s, 2H), 3.22 – 3.17 (m, 1H), 1.30 (t,  $J = 7.1$  Hz, 3H), 1.13 (t,  $J = 7.1$  Hz, 3H).

**$^{13}\text{C}\{^1\text{H}\}$  NMR** (101 MHz, Acetone- $d_6$ )  $\delta$  181.0, 165.9, 165.5, 156.2, 144.9, 143.2, 135.6, 134.2, 133.8, 132.2, 129.3, 129.0, 128.7, 127.5, 127.4, 125.8, 124.0, 85.8, 85.0, 61.8, 60.7, 46.1, 42.5, 33.5, 14.6, 14.5.

**HRMS** (ESI) Calculated for  $\text{C}_{28}\text{H}_{26}\text{O}_5$  ( $[\text{M}] + \text{Na}^+$ ) = 465.1672, Found 465.1671.

**IR** (neat) 2983, 1716, 1661, 1601, 1490, 1453, 1379, 1275, 1232, 1207, 1168, 1139, 1114, 1088, 1026, 982, 928, 861, 758, 693, 529  $\text{cm}^{-1}$ .

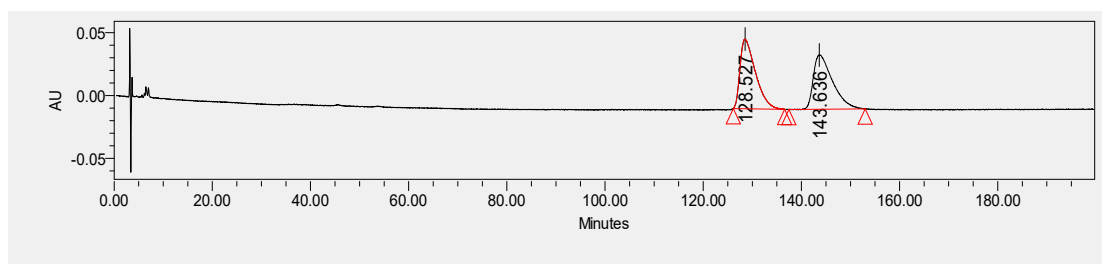

|   | Retention Time | Area     | % Area |
|---|----------------|----------|--------|
| 1 | 128.527        | 12110256 | 50.69  |
| 2 | 143.636        | 11779369 | 49.31  |

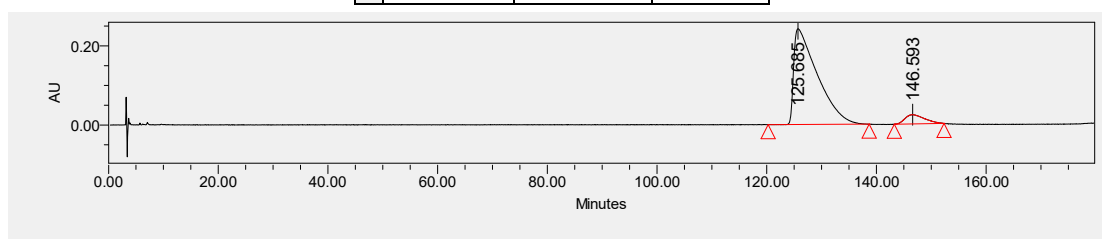

|   | Retention Time | Area     | % Area |
|---|----------------|----------|--------|
| 1 | 125.685        | 72483076 | 92.57  |
| 2 | 146.593        | 5814645  | 7.43   |



**Ethyl (R,E)-4-(but-2-en-1-yl)-1-oxo-4-(3-phenylprop-2-yn-1-yl)-1,4-dihydronaphthalene-2-carboxylate (B35)**

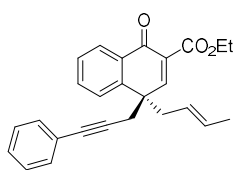

White solid, Mp: 101–104 °C, 70% yield, 99% *ee*;  $[\alpha]^{14.2} = -65.3$  ( $c = 0.41$  in  $\text{CH}_2\text{Cl}_2$ ,  $\lambda = 589$  nm).

**HPLC:** Daicel chiralcel ODH, *n*-hexane/*i*-PrOH = 95/5, 1.0 mL/min,  $\lambda = 224$  nm,  $t_{R(\text{minor})} = 15.51$  min,  $t_{R(\text{major})} = 16.84$  min.

**$^1\text{H}$  NMR** (400 MHz, Acetone- $d_6$ )  $\delta$  8.12 (dd,  $J = 7.9, 1.5$  Hz, 1H), 7.83 (dd,  $J = 8.0, 1.1$  Hz, 1H), 7.74 – 7.69 (m, 1H), 7.65 (s, 1H), 7.48 (ddd,  $J = 8.1, 7.2, 1.2$  Hz, 1H), 7.28 – 7.22 (m, 3H), 7.18 – 7.14 (m, 2H), 5.48 – 5.39 (m, 1H), 5.02 (ddd,  $J = 15.1, 7.5, 1.7$  Hz, 1H), 4.28 (q,  $J = 7.1$  Hz, 2H), 3.18 (s, 2H), 3.01 – 2.84 (m, 2H), 1.45 – 1.42 (m, 3H), 1.31 (t,  $J = 7.1$  Hz, 3H).

**$^{13}\text{C}\{^1\text{H}\}$  NMR** (101 MHz, Acetone- $d_6$ )  $\delta$  181.4, 165.7, 157.4, 145.8, 135.1, 134.0, 133.9, 132.2, 130.5, 129.3, 129.0, 128.3, 127.4, 127.2, 125.82, 124.1, 86.3, 84.6, 61.7, 46.6, 43.9, 32.7, 18.1, 14.6.

**HRMS** (ESI) Calculated for  $\text{C}_{26}\text{H}_{24}\text{O}_3$  ( $[\text{M}] + \text{Na}^+$ ) = 407.1618, Found 407.1615.

**IR** (neat) 2980, 1736, 1664, 1601, 1490, 1452, 1379, 1276, 1231, 1186, 1162, 1139, 1085, 1019, 967, 928, 861, 692, 638, 529  $\text{cm}^{-1}$ .

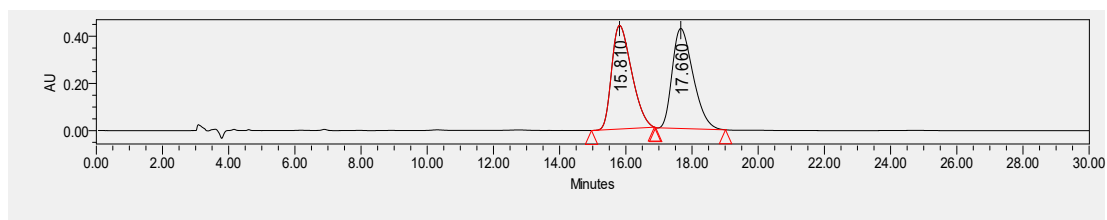

|   | Retention Time | Area     | % Area |
|---|----------------|----------|--------|
| 1 | 15.810         | 18398426 | 49.79  |
| 2 | 17.660         | 18554458 | 50.21  |

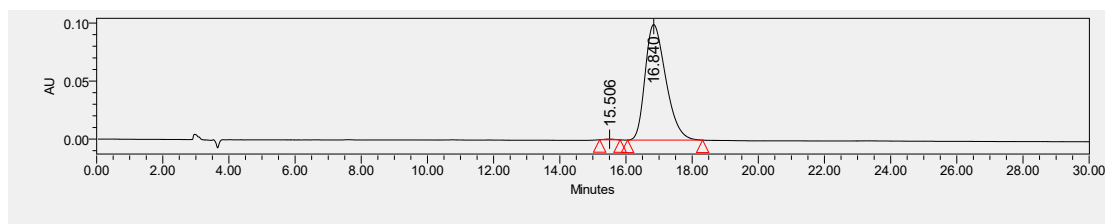

|   | Retention Time | Area    | % Area |
|---|----------------|---------|--------|
| 1 | 15.506         | 10563   | 0.24   |
| 2 | 16.840         | 4326482 | 99.76  |

**Ethyl (R,E)-4-(hex-2-en-1-yl)-1-oxo-4-(3-phenylprop-2-yn-1-yl)-1,4-dihydronaphthalene-2-carboxylate (B36)**

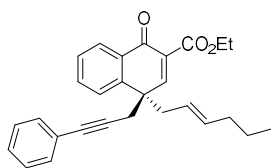

Colorless oil, 35% yield, 99% *ee*;  $[\alpha]^{14.1} = -66.2$  ( $c = 0.27$  in  $\text{CH}_2\text{Cl}_2$ ,  $\lambda = 589$  nm).

**HPLC:** Daicel chiralcel ODH, *n*-hexane/*i*-PrOH = 80/20, 1.0 mL/min,  $\lambda = 224$  nm,  $t_{R(\text{minor})} = 13.57$  min,  $t_{R(\text{major})} = 15.24$  min.

**$^1\text{H}$  NMR** (400 MHz, Acetone- $d_6$ )  $\delta$  8.12 (dd,  $J = 7.9, 1.5$  Hz, 1H), 7.84 (dd,  $J = 8.1, 1.2$  Hz, 1H), 7.72 (td,  $J = 8.5, 7.9, 1.5$  Hz, 1H), 7.66 (s, 1H), 7.48 (ddd,  $J = 8.1, 7.3, 1.2$  Hz, 1H), 7.31 – 7.22 (m, 3H), 7.19 – 7.12 (m, 2H), 5.44 – 5.36 (m, 1H), 4.97 (dddd,  $J = 15.0, 7.4, 5.9, 1.4$  Hz, 1H), 4.28 (q,  $J = 7.1$  Hz, 2H), 3.19 (s, 2H), 3.02 – 2.85 (m, 2H), 1.78 – 1.72 (m, 2H), 1.31 (t,  $J = 7.1$  Hz, 3H), 1.14 (q,  $J = 7.3$  Hz, 2H), 0.67 (t,  $J = 7.4$  Hz, 3H).

**$^{13}\text{C}\{^1\text{H}\}$  NMR** (101 MHz, Acetone- $d_6$ )  $\delta$  181.4, 165.6, 157.5, 145.8, 136.1, 135.1, 134.0, 133.9, 132.2, 129.3, 129.0, 128.3, 127.4, 127.2, 124.9, 124.1, 86.3, 84.6, 61.6, 46.7, 43.9, 35.2, 32.7, 23.1, 14.6, 13.7.

**HRMS** (ESI) Calculated for  $\text{C}_{28}\text{H}_{28}\text{O}_3$  ( $[\text{M}]+\text{Na}^+$ ) = 435.1931, Found 435.1928.

**IR** (neat) 2959, 2928, 2870, 1737, 1666, 1601, 1490, 1454, 1379, 1275, 1231, 1162, 1139, 1086, 1020, 969, 928, 759, 692, 640, 528  $\text{cm}^{-1}$ .

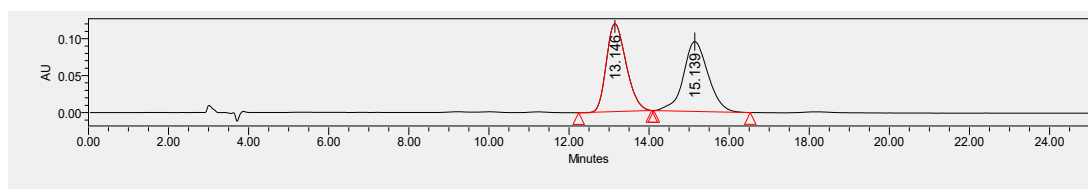

|   | Retention Time | Area    | % Area |
|---|----------------|---------|--------|
| 1 | 13.146         | 4072511 | 50.20  |
| 2 | 15.139         | 4039543 | 49.80  |

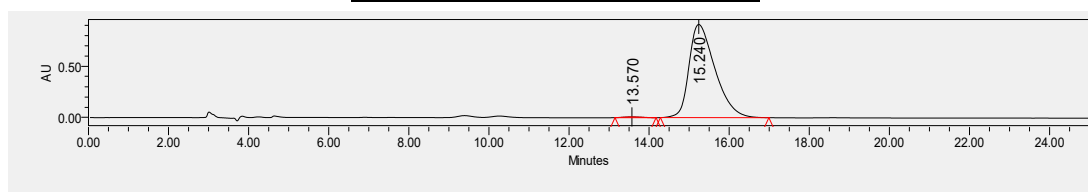

|   | Retention Time | Area     | % Area |
|---|----------------|----------|--------|
| 1 | 13.570         | 212990   | 0.52   |
| 2 | 15.240         | 40871541 | 99.48  |

**Ethyl (R,E)-4-(3-cyclohexylallyl)-1-oxo-4-(3-phenylprop-2-yn-1-yl)-1,4-dihydronaphthalene-2-carboxylate (B37)**

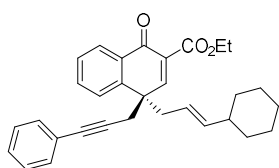

Colorless oil, 55% yield, 95% *ee*;  $[\alpha]^{14.2} = -42.4$  ( $c = 0.47$  in  $\text{CH}_2\text{Cl}_2$ ,  $\lambda = 589$  nm).

**HPLC:** Daicel chiralcel ODH, *n*-hexane/*i*-PrOH = 95/5, 1.0 mL/min,  $\lambda = 224$  nm,  $t_{R(\text{minor})} = 12.44$  min,  $t_{R(\text{major})} = 15.15$  min.

**$^1\text{H NMR}$**  (400 MHz, Acetone- $d_6$ )  $\delta$  8.12 (dd,  $J = 7.9, 1.5$  Hz, 1H), 7.84 (dd,  $J = 8.1, 1.1$  Hz, 1H), 7.72 (td,  $J = 7.7, 1.5$  Hz, 1H), 7.64 (s, 1H), 7.48 (ddd,  $J = 8.1, 7.2, 1.1$  Hz, 1H), 7.29 – 7.22 (m, 3H), 7.19 – 7.14 (m, 2H), 5.31 (dd,  $J = 15.3, 7.1$  Hz, 1H), 4.95 – 4.87 (m, 1H), 4.28 (q,  $J = 7.1$  Hz, 2H), 3.21 (s, 2H), 2.97 – 2.81 (m, 2H), 1.68 (dp,  $J = 11.1, 3.6$  Hz, 1H), 1.58 – 1.38 (m, 5H), 1.31 (t,  $J = 7.1$  Hz, 3H), 1.16 – 1.02 (m, 3H), 0.84 (tq,  $J = 12.2, 3.8$  Hz, 2H).

**$^{13}\text{C}\{^1\text{H}\}$  NMR** (101 MHz, Acetone- $d_6$ )  $\delta$  181.4, 165.7, 157.4, 145.9, 142.3, 135.1, 134.0, 133.9, 132.2, 129.3, 129.0, 128.2, 127.4, 127.2, 124.1, 122.0, 86.4, 84.5, 61.6, 46.8, 44.0, 41.4, 33.6, 33.6, 32.4, 26.8, 26.5, 14.7.

**HRMS** (ESI) Calculated for  $\text{C}_{31}\text{H}_{32}\text{O}_3$  ( $[\text{M}] + \text{Na}^+$ ) = 475.2244, Found 475.2243.

**IR** (neat) 2923, 2850, 1737, 1667, 1601, 1490, 1448, 1379, 1276, 1231, 1138, 1087, 1021, 970, 928, 759, 692, 528  $\text{cm}^{-1}$ .

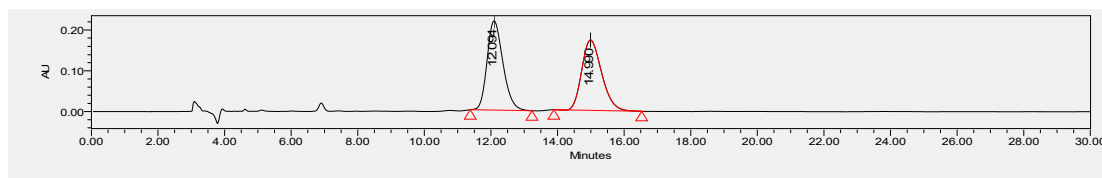

|   | Retention Time | Area    | % Area |
|---|----------------|---------|--------|
| 1 | 12.094         | 7244408 | 50.29  |
| 2 | 14.990         | 7159569 | 49.71  |

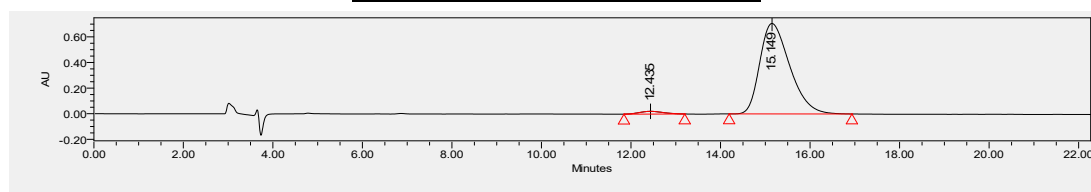

|   | Retention Time | Area     | % Area |
|---|----------------|----------|--------|
| 1 | 12.435         | 775597   | 2.31   |
| 2 | 15.149         | 32799082 | 97.69  |

**Ethyl (R)-4-((E)-3-(4-bromophenyl)allyl)-4-cinnamyl-1-oxo-1,4-dihydronaphthalene-2-carboxylate (B38)**

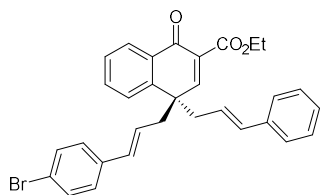

White solid, Mp: 37–40 °C, 62% yield, 90% *ee*;  $[\alpha]^{23.0} = -9.0$  ( $c = 0.65$  in  $\text{CH}_2\text{Cl}_2$ ,  $\lambda = 589$  nm).

**HPLC:** Daicel chiralcel IC, *n*-hexane/*i*-PrOH = 90/10, 1.0 mL/min,  $\lambda = 224$  nm,  $t_{R(\text{minor})} = 34.84$  min,  $t_{R(\text{major})} = 39.85$  min.

**$^1\text{H}$  NMR** (400 MHz, Acetone- $d_6$ )  $\delta$  8.06 (dd,  $J = 7.9, 1.5$  Hz, 1H), 7.90 (dd,  $J = 8.1, 1.1$  Hz, 1H), 7.77 – 7.72 (m, 2H), 7.48 – 7.43 (m, 1H), 7.40 – 7.35 (m, 2H), 7.22 – 7.17 (m, 2H), 7.16 – 7.09 (m, 5H), 6.35 (dd,  $J = 15.8, 7.8$  Hz, 2H), 5.89 – 5.77 (m, 2H), 4.23 (q,  $J = 7.1$  Hz, 2H), 3.15 (ddt,  $J = 13.9, 7.4, 1.6$  Hz, 2H), 3.04 (ddd,  $J = 13.9, 7.6, 1.3$  Hz, 2H), 1.26 (t,  $J = 7.2$  Hz, 3H).

**$^{13}\text{C}$  NMR** (101 MHz, Acetone- $d_6$ )  $\delta$  181.1, 165.6, 158.6, 146.1, 138.0, 137.3, 134.9, 134.8, 134.0, 133.7, 133.6, 132.4, 129.4, 128.8, 128.2, 128.2, 127.7, 127.4, 127.0, 126.2, 124.9, 121.5, 61.6, 47.5, 45.3, 45.2, 14.6.

**HRMS** (ESI) Calculated for  $\text{C}_{31}\text{H}_{27}^{79}\text{BrO}_3$  ( $[\text{M}]+\text{Na}^+$ ) = 549.1036, Found 549.1044.

**HRMS** (ESI) Calculated for  $\text{C}_{31}\text{H}_{27}^{81}\text{BrO}_3$  ( $[\text{M}]+\text{Na}^+$ ) = 551.1015, Found 551.1019.

**IR** (neat) 3027, 2982, 2361, 1734, 1660, 1600, 1486, 1450, 1379, 1269, 1229, 1161, 1137, 1073, 1011, 966, 929, 805, 739, 695, 626, 515  $\text{cm}^{-1}$ .

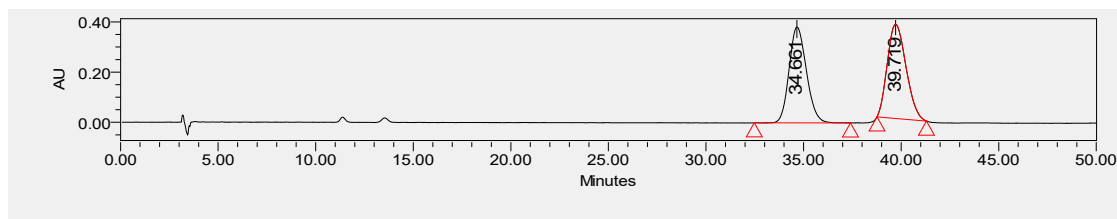

|   | Retention Time | Area     | % Area |
|---|----------------|----------|--------|
| 1 | 34.661         | 23540855 | 48.51  |
| 2 | 39.719         | 24987710 | 51.49  |

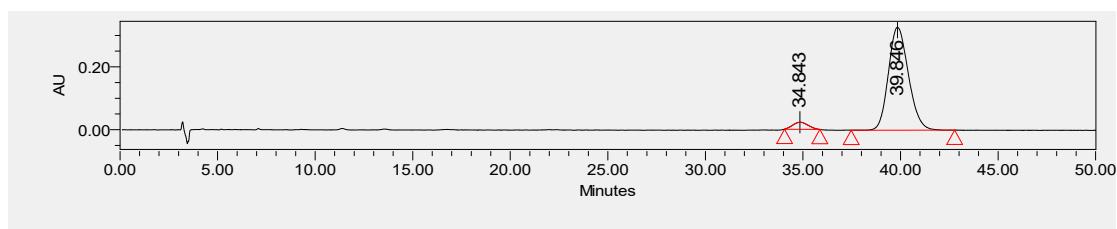

|   | Retention Time | Area     | % Area |
|---|----------------|----------|--------|
| 1 | 34.843         | 1232104  | 5.01   |
| 2 | 39.846         | 23348137 | 94.99  |

**Ethyl (S)-4-((E)-3-(4-bromophenyl)allyl)-4-cinnamyl-1-oxo-1,4-dihydronaphthalene-2-carboxylate (*ent*-B38)**

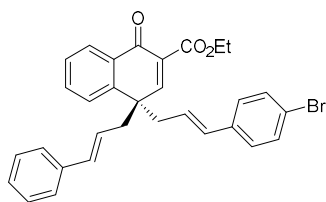

White solid, Mp: 37–40 °C, 55% yield, 93% *ee*;  $[\alpha]^{23.9} = 9.5$  ( $c = 0.58$  in  $\text{CH}_2\text{Cl}_2$ ,  $\lambda = 589$  nm).

**HPLC:** Daicel chiralcel IC, *n*-hexane/*i*-PrOH = 90/10, 1.0 mL/min,  $\lambda = 224$  nm,  $t_{R(\text{minor})} = 39.96$  min,  $t_{R(\text{major})} = 34.67$  min.

**$^1\text{H}$  NMR** (400 MHz, Acetone- $d_6$ )  $\delta$  8.06 (dd,  $J = 7.9, 1.4$  Hz, 1H), 7.90 (dd,  $J = 8.0, 1.1$  Hz, 1H), 7.77 – 7.72 (m, 2H), 7.48 – 7.43 (m, 1H), 7.40 – 7.35 (m, 2H), 7.22 – 7.18 (m, 2H), 7.16 – 7.09 (m, 5H), 6.35 (dd,  $J = 15.8, 7.5$  Hz, 2H), 5.89 – 5.77 (m, 2H), 4.23 (q,  $J = 7.1$  Hz, 2H), 3.15 (ddt,  $J = 13.9, 7.4, 1.6$  Hz, 2H), 3.04 (ddd,  $J = 13.8, 7.6, 1.3$  Hz, 2H), 1.26 (t,  $J = 7.1$  Hz, 3H).

**$^{13}\text{C}$  NMR** (101 MHz, Acetone- $d_6$ )  $\delta$  181.1, 165.6, 158.6, 146.1, 138.0, 137.3, 134.9, 134.8, 134.0, 133.8, 133.6, 132.4, 129.4, 128.8, 128.2, 128.2, 127.7, 127.4, 127.0, 126.2, 124.9, 121.5, 61.6, 47.5, 45.3, 45.2, 14.6.

**HRMS** (ESI) Calculated for  $\text{C}_{31}\text{H}_{27}^{79}\text{BrO}_3$  ( $[\text{M}]+\text{Na}^+$ ) = 549.1036, Found 549.1046.

**HRMS** (ESI) Calculated for  $\text{C}_{31}\text{H}_{27}^{81}\text{BrO}_3$  ( $[\text{M}]+\text{Na}^+$ ) = 551.1015, Found 551.1020.

**IR** (neat) 3027, 2982, 2361, 1734, 1660, 1600, 1486, 1450, 1379, 1269, 1229, 1161, 1137, 1073, 1011, 966, 929, 805, 739, 695, 626, 515  $\text{cm}^{-1}$ .



|   | Retention Time | Area     | % Area |
|---|----------------|----------|--------|
| 1 | 34.661         | 23540855 | 48.51  |
| 2 | 39.719         | 24987710 | 51.49  |

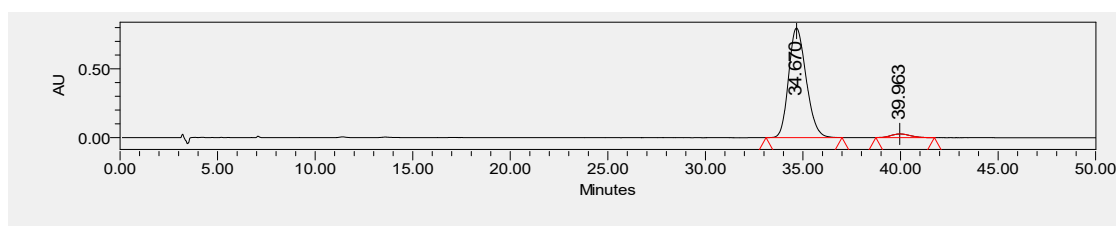

|   | Retention Time | Area     | % Area |
|---|----------------|----------|--------|
| 1 | 34.670         | 49735969 | 96.45  |
| 2 | 39.963         | 1830803  | 3.55   |

**Ethyl (R)-4-cinnamyl-4-((E)-3-(naphthalen-1-yl)allyl)-1-oxo-1,4-dihydronaphthalene-2-carboxylate (B39)**

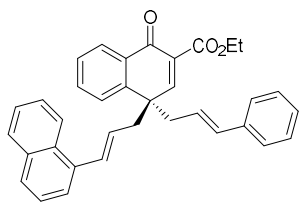

White solid, Mp: 52–55 °C, 76% yield, 97% *ee*;  $[\alpha]^{24.5} = 15.2$  ( $c = 0.66$  in  $\text{CH}_2\text{Cl}_2$ ,  $\lambda = 589$  nm).

**HPLC:** Daicel chiralcel ODH, *n*-hexane/*i*-PrOH = 80/20, 1.0 mL/min,  $\lambda = 224$  nm,  $t_{\text{R}(\text{minor})} = 25.80$  min,  $t_{\text{R}(\text{major})} = 20.23$  min.

**$^1\text{H}$  NMR** (400 MHz, Acetone- $d_6$ )  $\delta$  8.06 (dd,  $J = 7.8, 1.5$  Hz, 1H), 7.98 (dd,  $J = 8.0, 1.1$  Hz, 1H), 7.85 (s, 1H), 7.84 – 7.76 (m, 3H), 7.73 (d,  $J = 8.1$  Hz, 1H), 7.49 – 7.42 (m, 3H), 7.35 – 7.30 (m, 1H), 7.26 – 7.14 (m, 6H), 7.07 (d,  $J = 15.5$  Hz, 1H), 6.40 (d,  $J = 15.7$  Hz, 1H), 5.90 – 5.82 (m, 1H), 5.74 (dt,  $J = 15.3, 7.6$  Hz, 1H), 4.23 (q,  $J = 7.1$  Hz, 2H), 3.29 (ddd,  $J = 13.6, 7.6, 1.3$  Hz, 1H), 3.22 – 3.14 (m, 2H), 3.08 (ddd,  $J = 13.9, 7.6, 1.3$  Hz, 1H), 1.24 (t,  $J = 7.1$  Hz, 3H).

**$^{13}\text{C}$  NMR** (101 MHz, Acetone- $d_6$ )  $\delta$  181.2, 165.6, 158.9, 146.3, 138.1, 136.0, 134.8, 134.6, 134.0, 133.9, 132.6, 132.0, 129.4, 129.3, 128.6, 128.5, 128.3, 128.2, 127.8, 127.5, 127.0, 126.9, 126.7, 126.5, 125.0, 124.8, 124.6, 61.6, 47.8, 45.5, 45.4, 14.6.

**HRMS** (ESI) Calculated for  $\text{C}_{35}\text{H}_{30}\text{O}_3$  ( $[\text{M}] + \text{Na}^+$ ) = 521.2087, Found 521.2093.

**IR** (neat) 3029, 2983, 2361, 1734, 1661, 1600, 1450, 1380, 1268, 1230, 1162, 1138, 1087, 1019, 966, 928, 863, 775, 695, 618, 553, 515  $\text{cm}^{-1}$ .

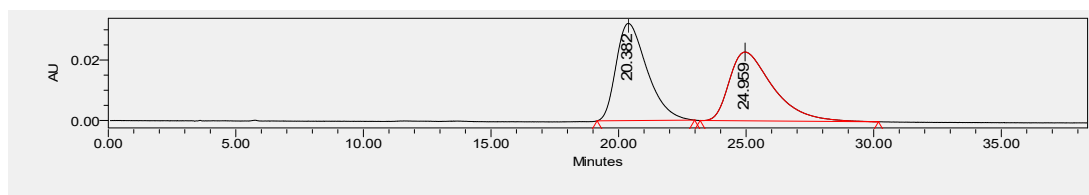

|   | Retention Time | Area    | % Area |
|---|----------------|---------|--------|
| 1 | 20.382         | 2710533 | 50.15  |
| 2 | 24.959         | 2694175 | 49.85  |

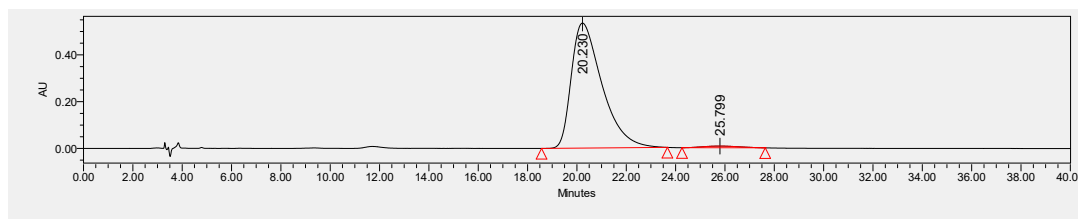

|   | Retention Time | Area     | % Area |
|---|----------------|----------|--------|
| 1 | 20.230         | 46162220 | 98.44  |
| 2 | 25.799         | 733541   | 1.56   |

**Ethyl (S)-4-cinnamyl-4-((E)-3-(naphthalen-1-yl)allyl)-1-oxo-1,4-dihydronaphthalene-2-carboxylate (*ent*-B39)**

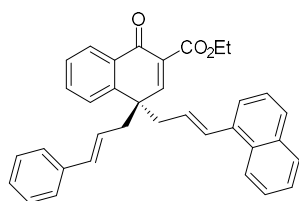

White solid, Mp: 52–55 °C, 67% yield, 96% *ee*;  $[\alpha]^{24.7} = -14.6$  ( $c = 0.47$  in  $\text{CH}_2\text{Cl}_2$ ,  $\lambda = 589$  nm).

**HPLC:** Daicel chiralcel ODH, *n*-hexane/*i*-PrOH = 80/20, 1.0 mL/min,  $\lambda = 224$  nm,  $t_{\text{R}(\text{minor})} = 20.95$  min,  $t_{\text{R}(\text{major})} = 24.64$  min.

**$^1\text{H}$  NMR** (400 MHz, Acetone- $d_6$ )  $\delta$  8.06 (dd,  $J = 7.9, 1.5$  Hz, 1H), 7.98 (dd,  $J = 8.0, 1.1$  Hz, 1H), 7.85 (s, 1H), 7.84 – 7.77 (m, 3H), 7.73 (d,  $J = 8.1$  Hz, 1H), 7.49 – 7.43 (m, 3H), 7.35 – 7.30 (m, 1H), 7.26 – 7.14 (m, 6H), 7.06 (d,  $J = 15.5$  Hz, 1H), 6.40 (d,  $J = 15.8$  Hz, 1H), 5.90 – 5.82 (m, 1H), 5.74 (dt,  $J = 15.3, 7.5$  Hz, 1H), 4.23 (q,  $J = 7.1$  Hz, 2H), 3.28 (ddd,  $J = 13.7, 7.5, 1.3$  Hz, 1H), 3.22 – 3.14 (m, 2H), 3.08 (ddd,  $J = 13.9, 7.6, 1.3$  Hz, 1H), 1.24 (t,  $J = 7.1$  Hz, 3H).

**$^{13}\text{C}$  NMR** (101 MHz, Acetone- $d_6$ )  $\delta$  181.2, 165.6, 158.8, 146.3, 138.0, 136.0, 134.8, 134.6, 134.0, 133.9, 132.6, 131.9, 129.4, 129.2, 128.6, 128.5, 128.2, 128.2, 127.8, 127.5, 127.0, 126.8, 126.7, 126.5, 125.0, 124.8, 124.6, 61.6, 47.8, 45.5, 45.4, 14.6.

**HRMS** (ESI) Calculated for  $\text{C}_{35}\text{H}_{30}\text{O}_3$  ( $[\text{M}] + \text{Na}^+$ ) = 521.2087, Found 521.2088.

**IR** (neat) 3029, 2982, 2361, 1735, 1662, 1600, 1450, 1380, 1270, 1230, 1161, 1138, 1087, 1019, 966, 928, 863, 775, 695, 618, 552, 514  $\text{cm}^{-1}$ .



|   | Retention Time | Area    | % Area |
|---|----------------|---------|--------|
| 1 | 20.382         | 2710533 | 50.15  |
| 2 | 24.959         | 2694175 | 49.85  |

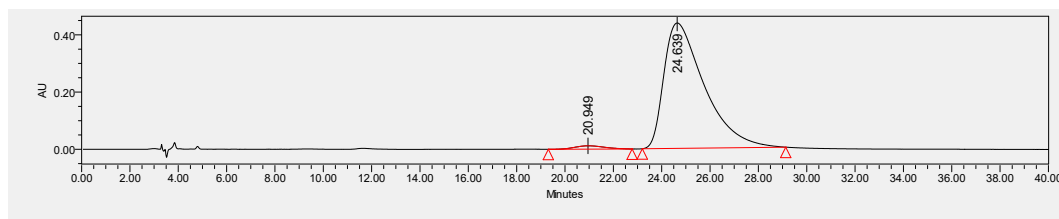

|   | Retention Time | Area     | % Area |
|---|----------------|----------|--------|
| 1 | 20.949         | 995406   | 1.92   |
| 2 | 24.639         | 50789067 | 98.08  |

**Ethyl (S)-4-((E)-but-2-en-1-yl)-4-cinnamyl-1-oxo-1,4-dihydronaphthalene-2-carboxylate (B40)**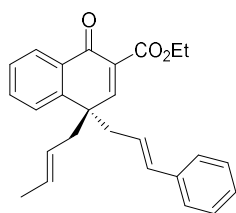

White solid, Mp: 79–82 °C, 64% yield, 89% *ee*;  $[\alpha]^{21.8} = 41.7$  ( $c = 0.50$  in  $\text{CH}_2\text{Cl}_2$ ,  $\lambda = 589$  nm).

**HPLC:** Daicel chiralcel ID, *n*-hexane/*i*-PrOH = 90/10, 1.0 mL/min,  $\lambda = 224$  nm,  $t_{R(\text{minor})} = 16.07$  min,  $t_{R(\text{major})} = 17.17$  min.

**$^1\text{H NMR}$**  (400 MHz, Acetone- $d_6$ )  $\delta$  8.07 (dd,  $J = 7.9, 1.5$  Hz, 1H), 7.81 (dd,  $J = 8.0, 1.2$  Hz, 1H), 7.72 (td,  $J = 7.6, 1.5$  Hz, 1H), 7.64 (s, 1H), 7.45 (ddd,  $J = 8.1, 7.1, 1.2$  Hz, 1H), 7.21 – 7.17 (m, 2H), 7.15 – 7.11 (m, 3H), 6.33 (d,  $J = 15.8$  Hz, 1H), 5.77 (dd,  $J = 15.5, 7.8$  Hz, 1H), 5.42 – 5.34 (m, 1H), 4.97 (dtq,  $J = 15.0, 7.4, 1.7$  Hz, 1H), 4.24 (q,  $J = 7.1$  Hz, 2H), 3.09 – 3.03 (m, 1H), 2.97 – 2.88 (m, 2H), 2.81 – 2.75 (m, 1H), 1.42 (d,  $J = 6.3$  Hz, 3H), 1.29 (t,  $J = 7.1$  Hz, 3H).

**$^{13}\text{C NMR}$**  (101 MHz, Acetone- $d_6$ )  $\delta$  181.3, 165.6, 159.0, 146.4, 138.1, 134.7, 134.6, 133.9, 130.2, 129.4, 128.2, 128.0, 127.6, 127.3, 126.9, 125.8, 125.1, 61.6, 47.4, 45.3, 45.1, 18.1, 14.6.

**HRMS** (ESI) Calculated for  $\text{C}_{26}\text{H}_{26}\text{O}_3$  ( $[\text{M}] + \text{Na}^+$ ) = 409.1774, Found 409.1772.

**IR** (neat) 3027, 2980, 2361, 1736, 1663, 1601, 1450, 1380, 1273, 1230, 1138, 1087, 1020, 967, 929, 757, 695, 618  $\text{cm}^{-1}$ .

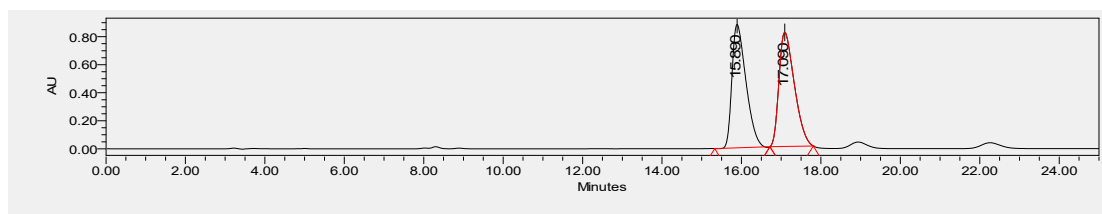

|   | Retention Time | Area     | % Area |
|---|----------------|----------|--------|
| 1 | 15.890         | 21577141 | 49.60  |
| 2 | 17.090         | 21924149 | 50.40  |

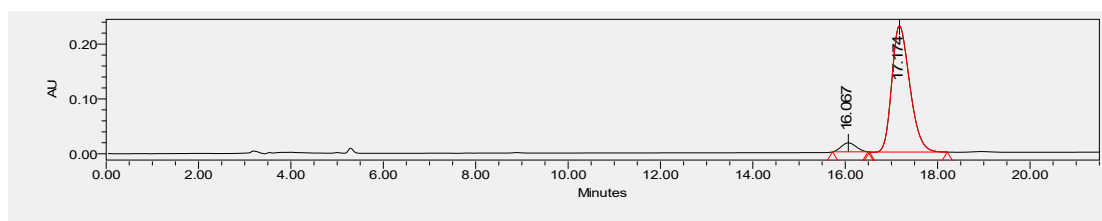

|   | Retention Time | Area    | % Area |
|---|----------------|---------|--------|
| 1 | 16.067         | 365132  | 5.53   |
| 2 | 17.174         | 6232654 | 94.47  |



**Ethyl (R)-4-((E)-but-2-en-1-yl)-4-cinnamyl-1-oxo-1,4-dihydronaphthalene-2-carboxylate**  
(*ent*-B40)

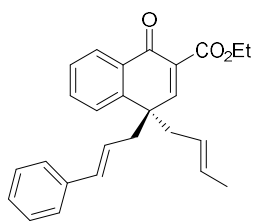

White solid, Mp: 79–82 °C, 57% yield, 95% *ee*;  $[\alpha]^{25.2} = -45.7$  ( $c = 0.30$  in  $\text{CH}_2\text{Cl}_2$ ,  $\lambda = 589$  nm).

**HPLC:** Daicel chiralcel ID, *n*-hexane/*i*-PrOH = 90/10, 1.0 mL/min,  $\lambda = 224$  nm,  $t_{\text{R}(\text{minor})} = 17.22$  min,  $t_{\text{R}(\text{major})} = 15.96$  min.

**$^1\text{H NMR}$**  (400 MHz, Acetone- $d_6$ )  $\delta$  8.07 (dd,  $J = 7.9, 1.4$  Hz, 1H), 7.82 (dd,  $J = 8.1, 1.1$  Hz, 1H), 7.72 (td,  $J = 7.6, 1.5$  Hz, 1H), 7.64 (s, 1H), 7.45 (ddd,  $J = 8.2, 7.2, 1.2$  Hz, 1H), 7.21 – 7.17 (m, 2H), 7.15 – 7.11 (m, 3H), 6.33 (d,  $J = 15.7$  Hz, 1H), 5.76 (dd,  $J = 15.5, 7.8$  Hz, 1H), 5.42 – 5.34 (m, 1H), 4.97 (dtq,  $J = 15.0, 7.4, 1.7$  Hz, 1H), 4.25 (q,  $J = 7.1$  Hz, 2H), 3.09 – 3.03 (m, 1H), 2.97 – 2.88 (m, 2H), 2.81 – 2.75 (m, 1H), 1.42 (d,  $J = 6.3$  Hz, 3H), 1.29 (t,  $J = 7.1$  Hz, 3H).

**$^{13}\text{C NMR}$**  (101 MHz, Acetone- $d_6$ )  $\delta$  181.3, 165.6, 159.0, 146.4, 138.1, 134.7, 134.6, 133.9, 130.2, 129.4, 128.2, 128.0, 127.6, 127.3, 126.9, 125.8, 125.1, 61.6, 47.4, 45.3, 45.1, 18.1, 14.6.

**HRMS** (ESI) Calculated for  $\text{C}_{26}\text{H}_{26}\text{O}_3$  ( $[\text{M}] + \text{Na}^+$ ) = 409.1774, Found 409.1775.

**IR** (neat) 3027, 2980, 2361, 1736, 1662, 1601, 1450, 1380, 1272, 1230, 1138, 1087, 1020, 966, 929, 757, 695, 618  $\text{cm}^{-1}$ .

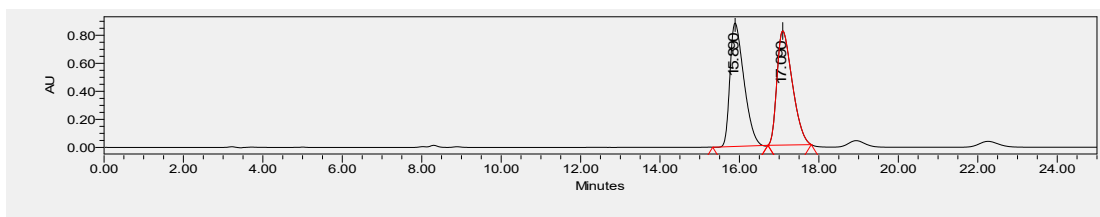

|   | Retention Time | Area     | % Area |
|---|----------------|----------|--------|
| 1 | 15.890         | 21577141 | 49.60  |
| 2 | 17.090         | 21924149 | 50.40  |

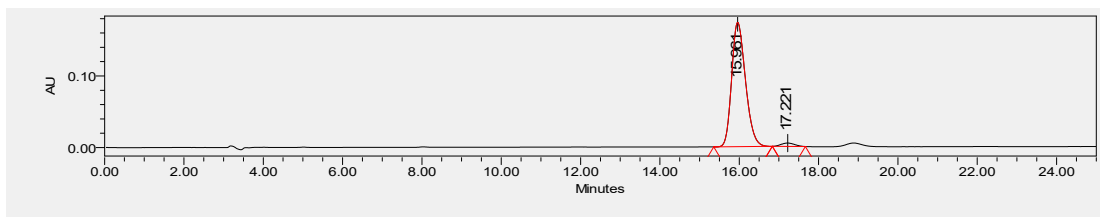

|   | Retention Time | Area    | % Area |
|---|----------------|---------|--------|
| 1 | 15.961         | 4191273 | 97.39  |
| 2 | 17.221         | 112338  | 2.61   |

**(R)-2-acetyl-4-cinnamyl-4-(3-phenylprop-2-yn-1-yl)naphthalen-1(4H)-one (B45)**

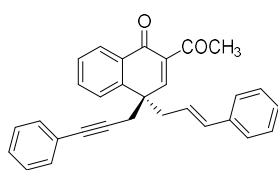

White solid, Mp: 101–104 °C, 84% yield, 17% *ee*;  $[\alpha]^{13.0} = -2.2$  ( $c = 0.69$  in  $\text{CH}_2\text{Cl}_2$ ,  $\lambda = 589$  nm).

**HPLC:** Daicel chiralcel ODH, *n*-hexane/*i*-PrOH = 80/20, 1.0 mL/min,  $\lambda = 224$  nm,  $t_{R(\text{minor})} = 11.32$  min,  $t_{R(\text{major})} = 17.31$  min.

**$^1\text{H}$  NMR** (400 MHz, Acetone- $d_6$ )  $\delta$  8.17 (dd,  $J = 7.9, 1.5$  Hz, 1H), 7.93 (d,  $J = 7.9$  Hz, 1H), 7.78 – 7.73 (m, 2H), 7.52 – 7.48 (m, 1H), 7.28 – 7.13 (m, 10H), 6.41 (dd,  $J = 15.8, 1.4$  Hz, 1H), 5.87 – 5.80 (m, 1H), 3.28 (d,  $J = 5.5$  Hz, 2H), 3.25 – 3.12 (m, 2H), 2.49 (s, 3H).

**$^{13}\text{C}\{^1\text{H}\}$  NMR** (101 MHz, Acetone- $d_6$ )  $\delta$  198.4, 183.5, 158.0, 145.9, 141.0, 137.9, 134.9, 134.1, 134.1, 132.2, 129.4, 129.3, 129.0, 128.4, 128.3, 127.4, 127.4, 127.0, 124.9, 124.0, 86.3, 84.6, 46.9, 44.1, 32.8, 31.1.

**HRMS** (ESI) Calculated for  $\text{C}_{30}\text{H}_{24}\text{O}_2$  ( $[\text{M}] + \text{Na}^+$ ) = 439.1669, Found 439.1667.

**IR** (neat) 3028, 1693, 1658, 1600, 1491, 1453, 1372, 1260, 1160, 1131, 1071, 966, 864, 758, 717, 692, 623, 528  $\text{cm}^{-1}$ .

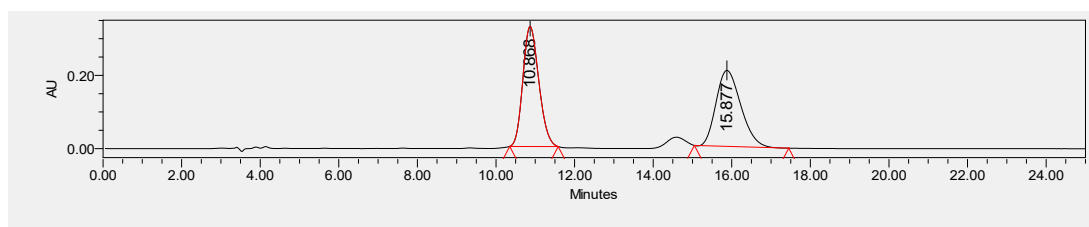

|   | Retention Time | Area    | % Area |
|---|----------------|---------|--------|
| 1 | 10.868         | 9227601 | 50.34  |
| 2 | 15.877         | 9103802 | 49.66  |

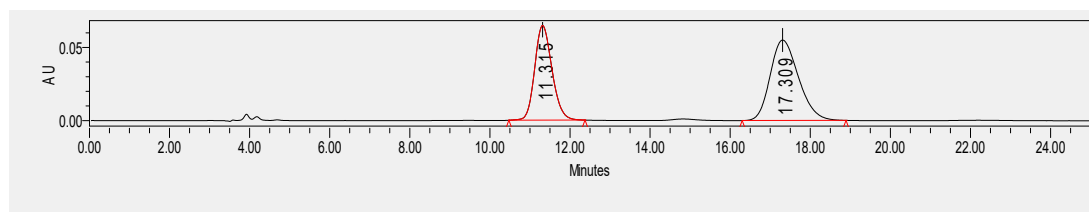

|   | Retention Time | Area    | % Area |
|---|----------------|---------|--------|
| 1 | 11.315         | 1939329 | 41.86  |
| 2 | 17.309         | 2693353 | 58.14  |

**Ethyl (R)-4-cinnamyl-1-oxo-4-((1-tosyl-1H-1,2,3-triazol-4-yl)methyl)-1,4-dihydronaphthalene-2-carboxylate (B46)**

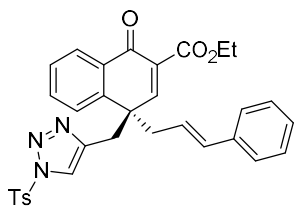

White solid, Mp: 50–53 °C, 95% yield, 95% *ee*;  $[\alpha]^{19.2} = 49.6$  ( $c = 1.04$  in  $\text{CH}_2\text{Cl}_2$ ,  $\lambda = 589$  nm).

**HPLC:** Daicel chiralcel ODH, *n*-hexane/*i*-PrOH = 80/20, 1.0 mL/min,  $\lambda = 224$  nm,  $t_{R(\text{minor})} = 34.18$  min,  $t_{R(\text{major})} = 48.34$  min.

**$^1\text{H}$  NMR** (400 MHz, Acetone- $d_6$ )  $\delta$  7.94 (dd,  $J = 8.1, 1.2$  Hz, 1H), 7.86 (dd,  $J = 7.9, 1.5$  Hz, 1H), 7.75 (d,  $J = 6.1$  Hz, 2H), 7.70 (dt,  $J = 7.2, 2.2$  Hz, 3H), 7.46 (d,  $J = 8.1$  Hz, 2H), 7.41 – 7.37 (m, 1H), 7.21 – 7.13 (m, 5H), 6.38 (d,  $J = 15.7$  Hz, 1H), 5.83 (dd,  $J = 15.5, 7.7$  Hz, 1H), 4.26 (t,  $J = 7.1$  Hz, 2H), 3.74 (d,  $J = 14.6$  Hz, 1H), 3.58 (d,  $J = 14.5$  Hz, 1H), 3.25 – 3.19 (m, 1H), 3.11 (ddd,  $J = 13.8, 7.6, 1.3$  Hz, 1H), 2.46 (s, 3H), 1.29 (t,  $J = 7.1$  Hz, 3H).

**$^{13}\text{C}$  NMR** (101 MHz, Acetone- $d_6$ )  $\delta$  180.6, 165.4, 157.3, 148.3, 145.0, 144.1, 137.9, 135.1, 135.0, 134.1, 134.0, 133.4, 131.6, 129.4, 128.7, 128.3, 128.3, 127.9, 127.2, 127.0, 124.6, 123.5, 61.7, 47.4, 45.2, 37.2, 21.8, 14.6.

**HRMS** (ESI) Calculated for  $\text{C}_{32}\text{H}_{29}\text{N}_3\text{O}_5\text{S}$  ( $[\text{M}] + \text{Na}^+$ ) = 590.1720, Found 590.1732.

**IR** (neat) 3028, 2950, 2827, 1741, 1670, 1600, 1495, 1452, 1435, 1365, 1277, 1247, 1157, 1133, 1081, 970, 874, 754, 695, 610, 496  $\text{cm}^{-1}$ .

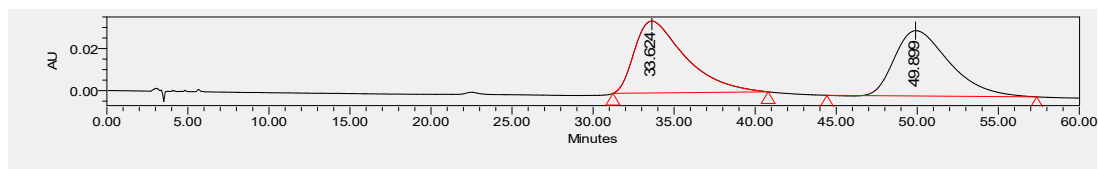

|   | Retention Time | Area    | % Area |
|---|----------------|---------|--------|
| 1 | 33.624         | 7446017 | 50.39  |
| 2 | 49.899         | 7330952 | 49.61  |

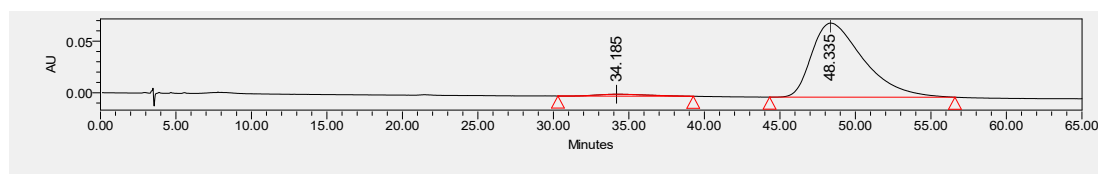

|   | Retention Time | Area     | % Area |
|---|----------------|----------|--------|
| 1 | 34.185         | 429532   | 2.45   |
| 2 | 48.335         | 17081735 | 97.55  |

## 16. Copies of NMR Spectra for the Reaction Products

### Ethyl (R)-4-cinnamyl-1-oxo-4-(3-phenylprop-2-yn-1-yl)-1,4-dihydronaphthalene-2-carboxylate (B1)

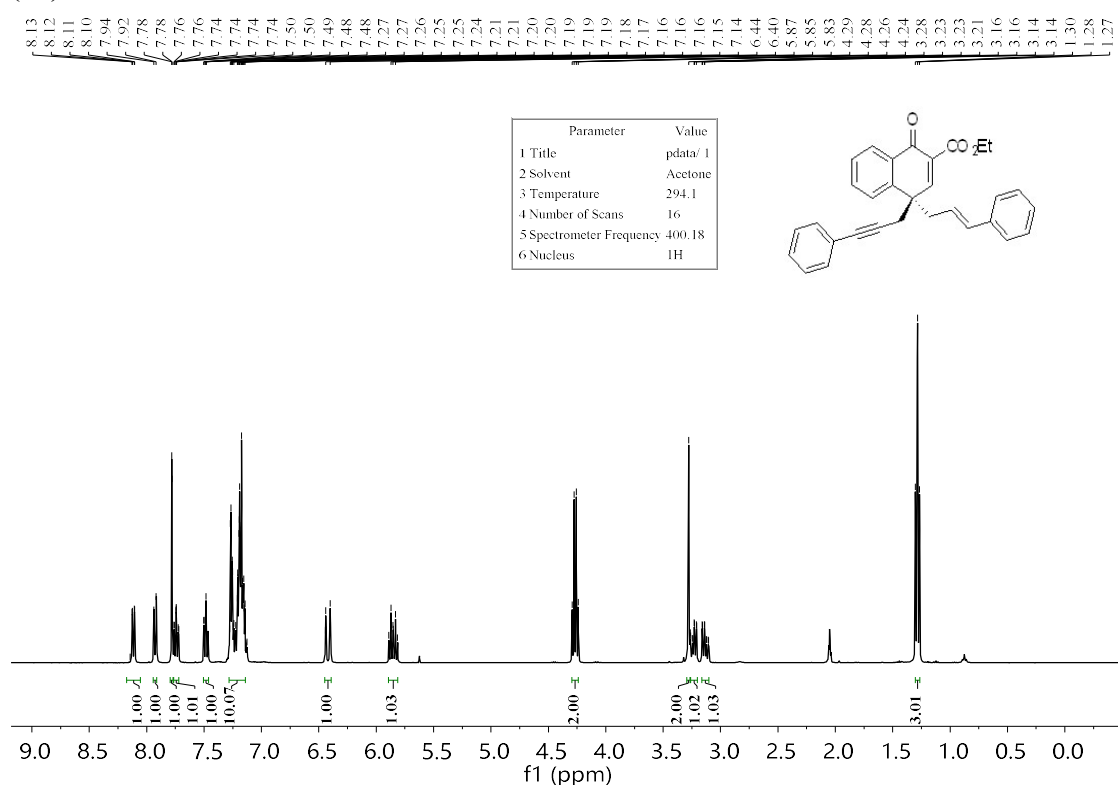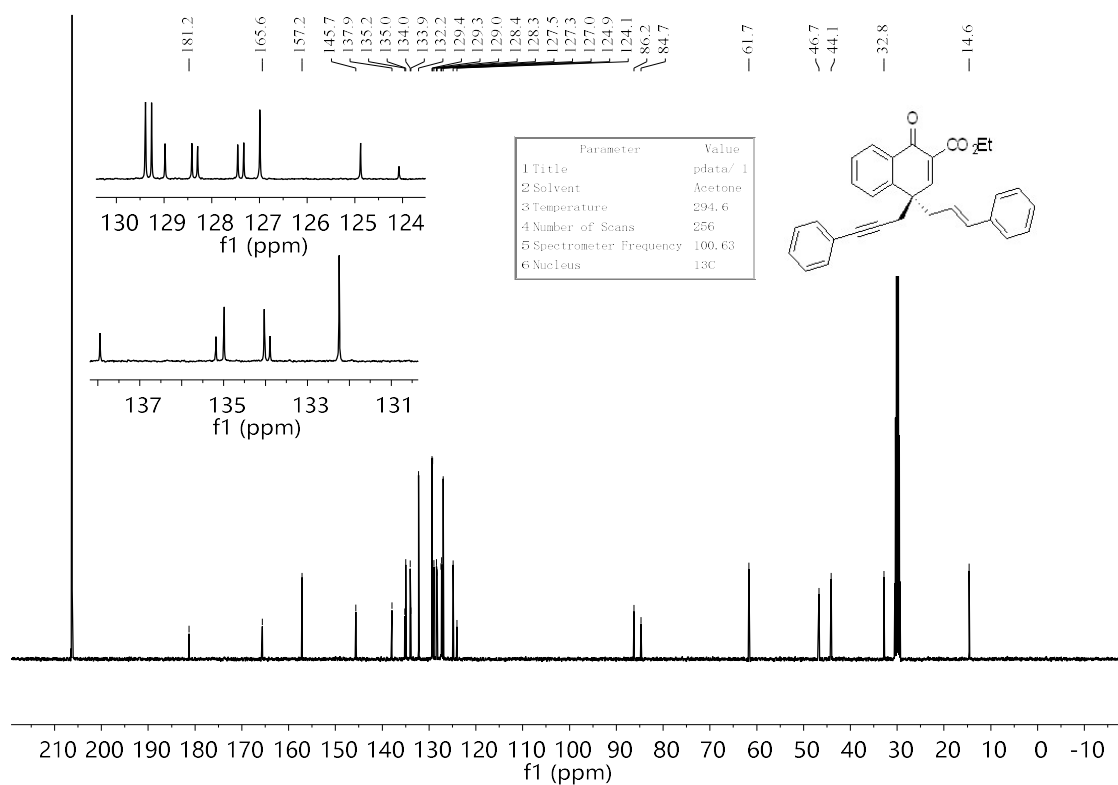

**Methyl (R)-4-cinnamyl-1-oxo-4-(3-phenylprop-2-yn-1-yl)-1,4-dihydronaphthalene-2-carboxylate (B2)**

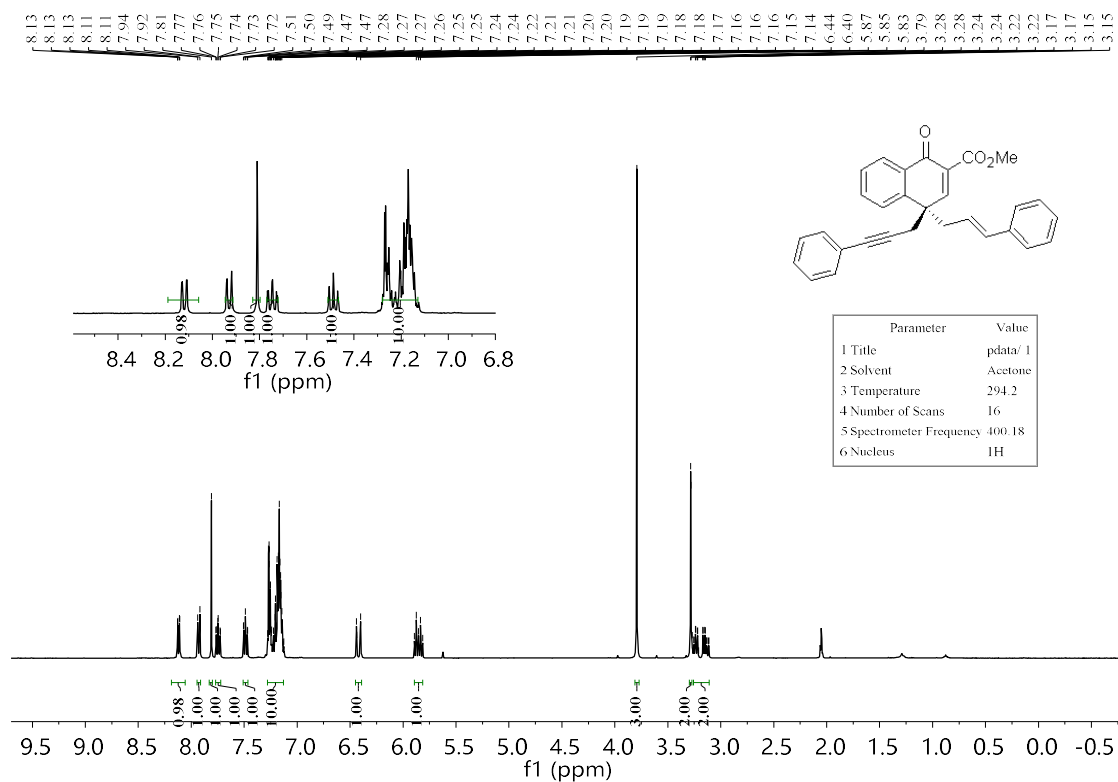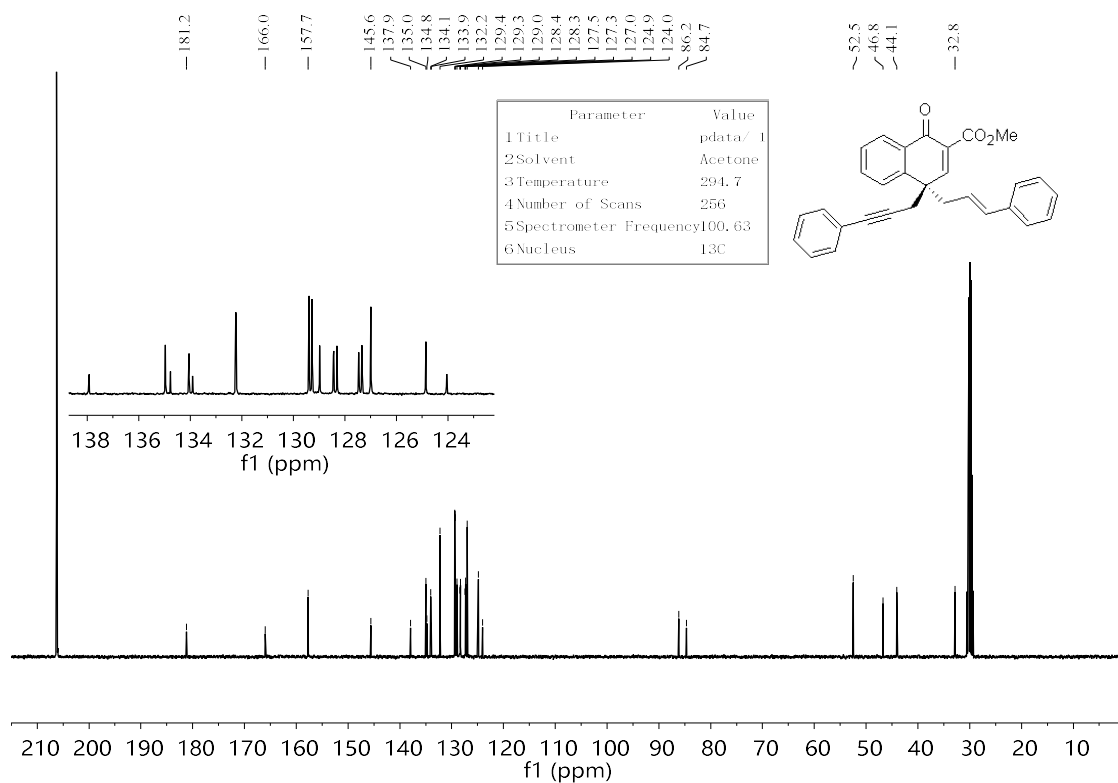

**Isopropyl (R)-4-cinnamyl-1-oxo-4-(3-phenylprop-2-yn-1-yl)-1,4-dihydronaphthalene-2-carboxylate (B3)**

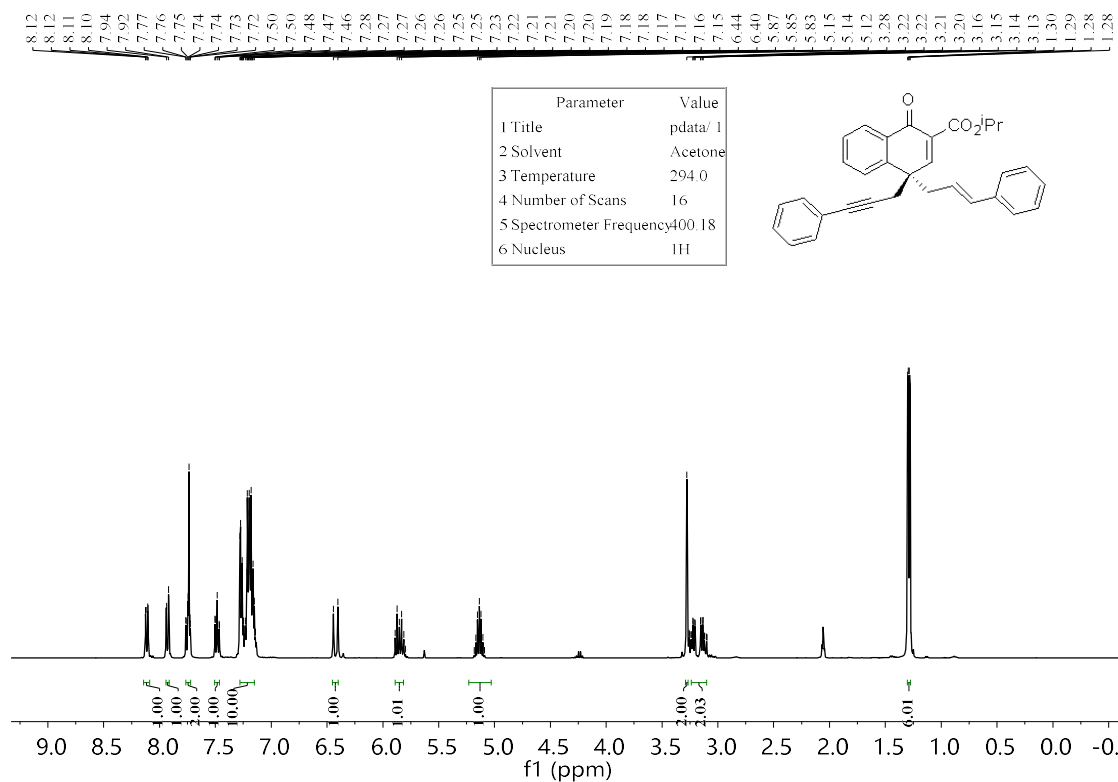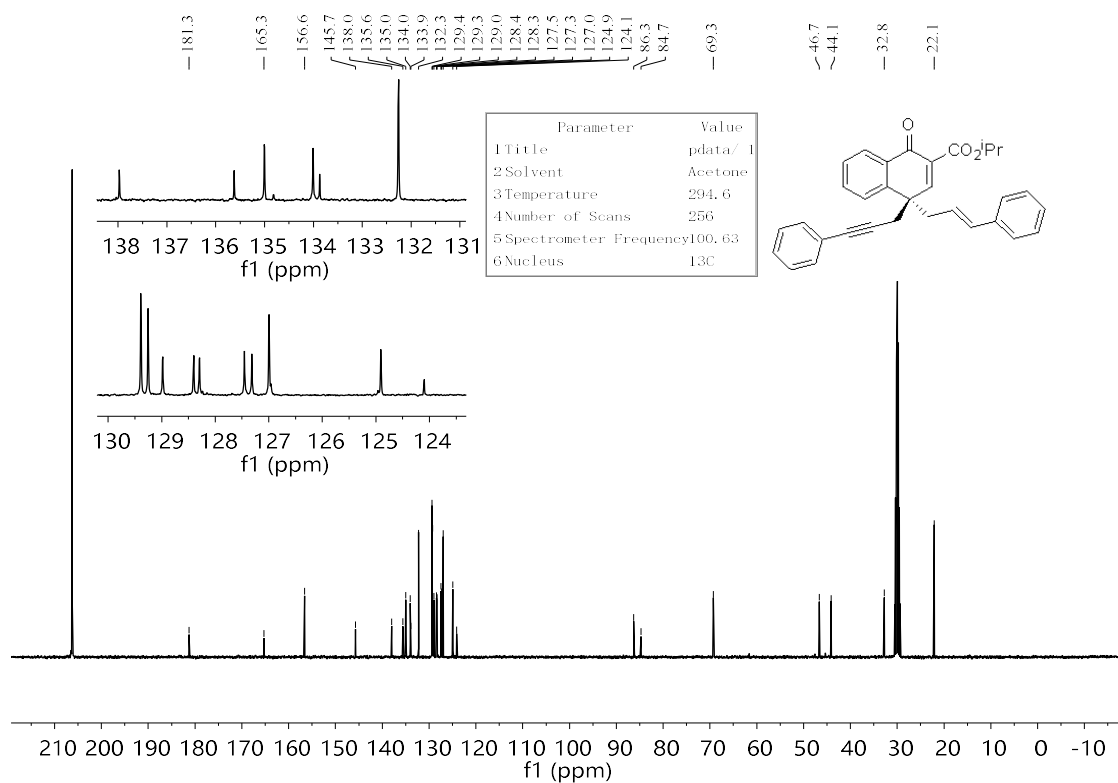

**Phenyl (R)-4-cinnamyl-1-oxo-4-(3-phenylprop-2-yn-1-yl)-1,4-dihydronaphthalene-2-carboxylate (B4)**

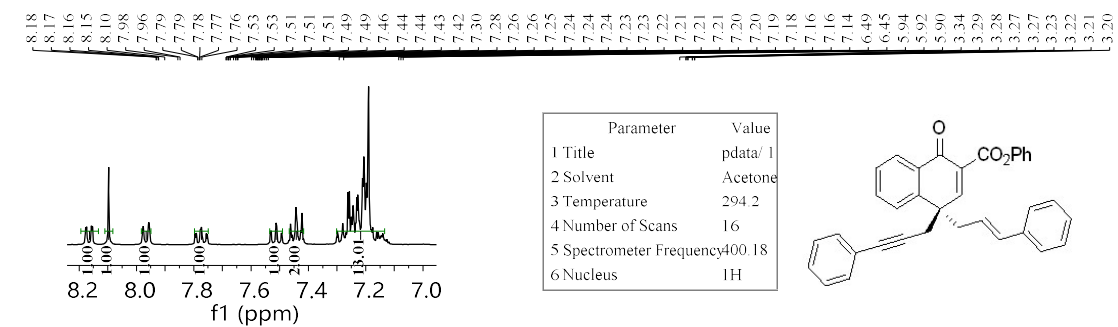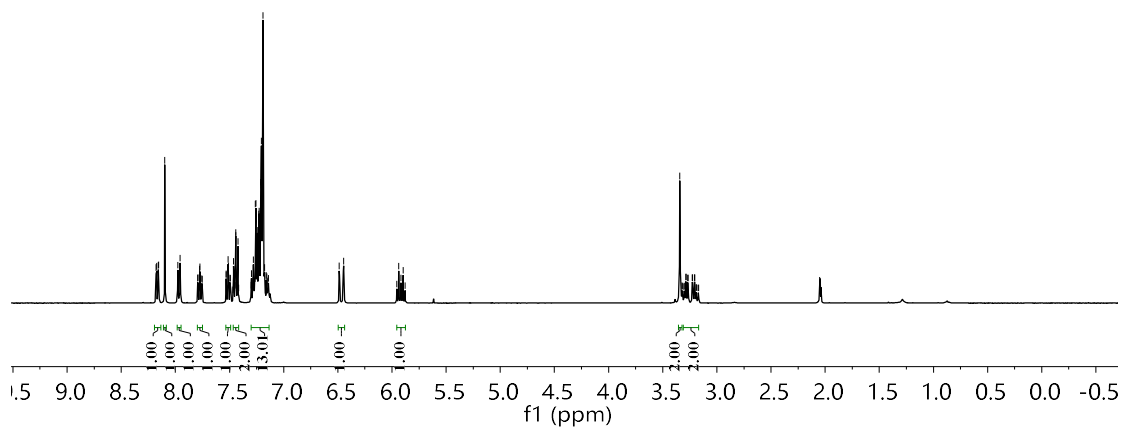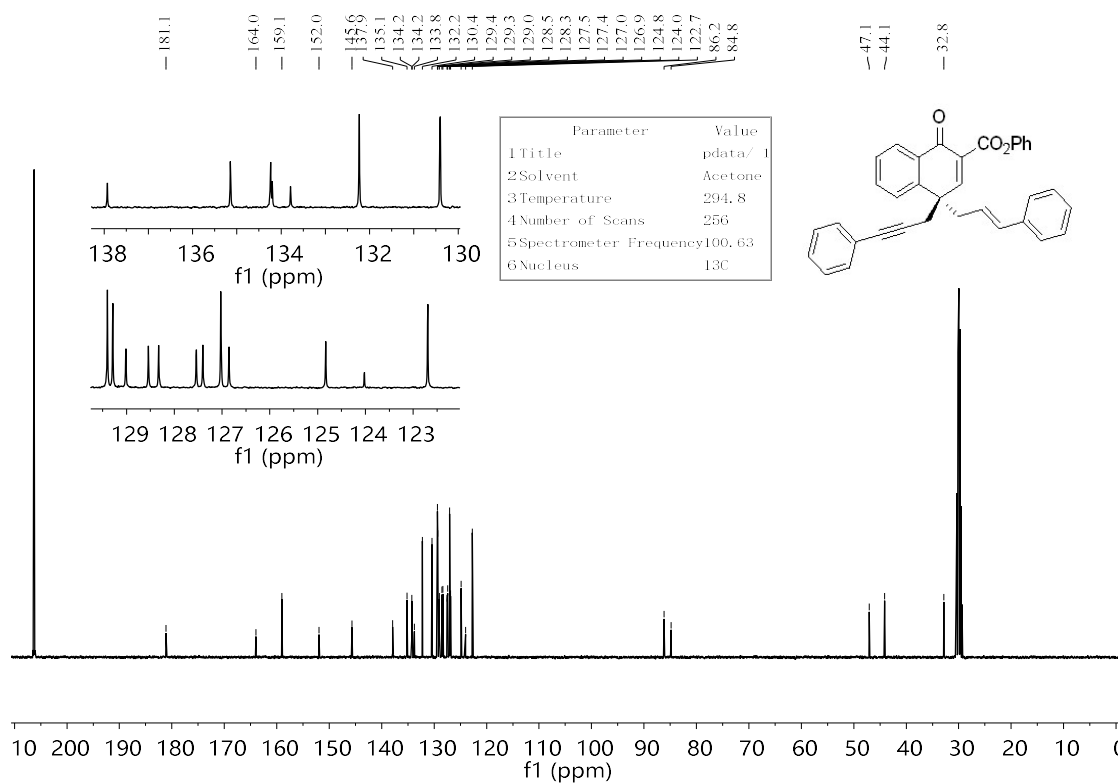

**Ethyl (R)-4-cinnamyl-1-oxo-4-(prop-2-yn-1-yl)-1,4-dihydronaphthalene-2-carboxylate (B5)**

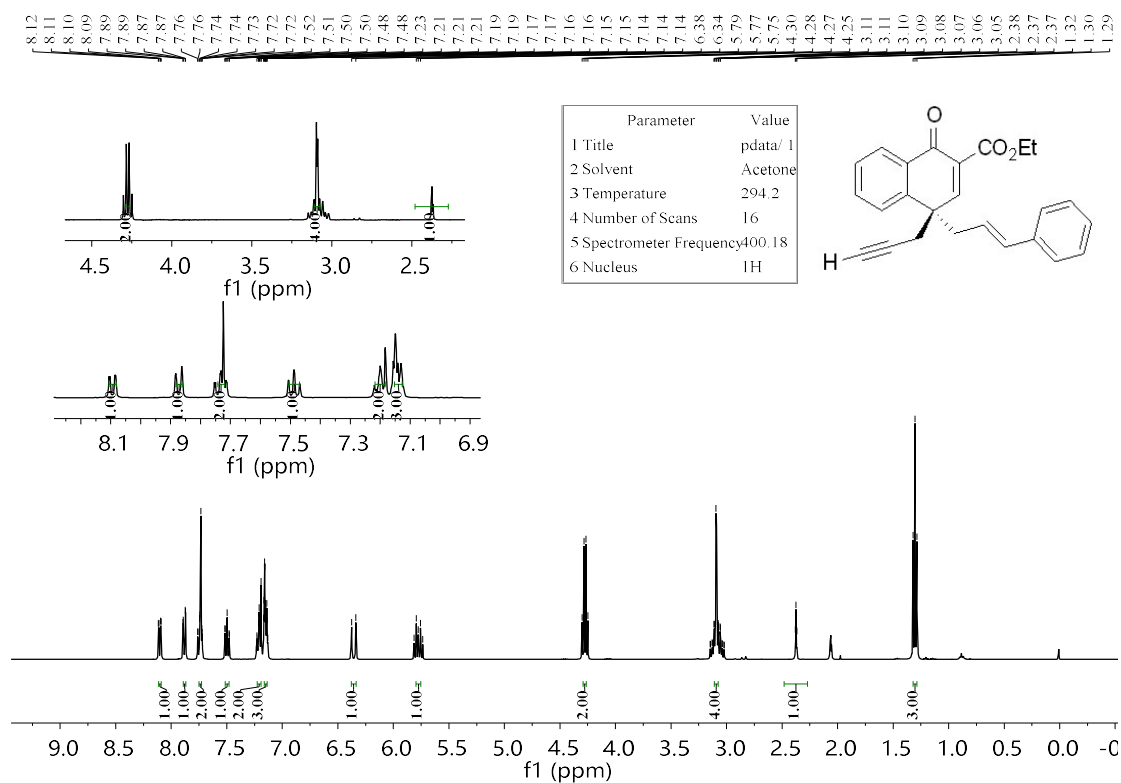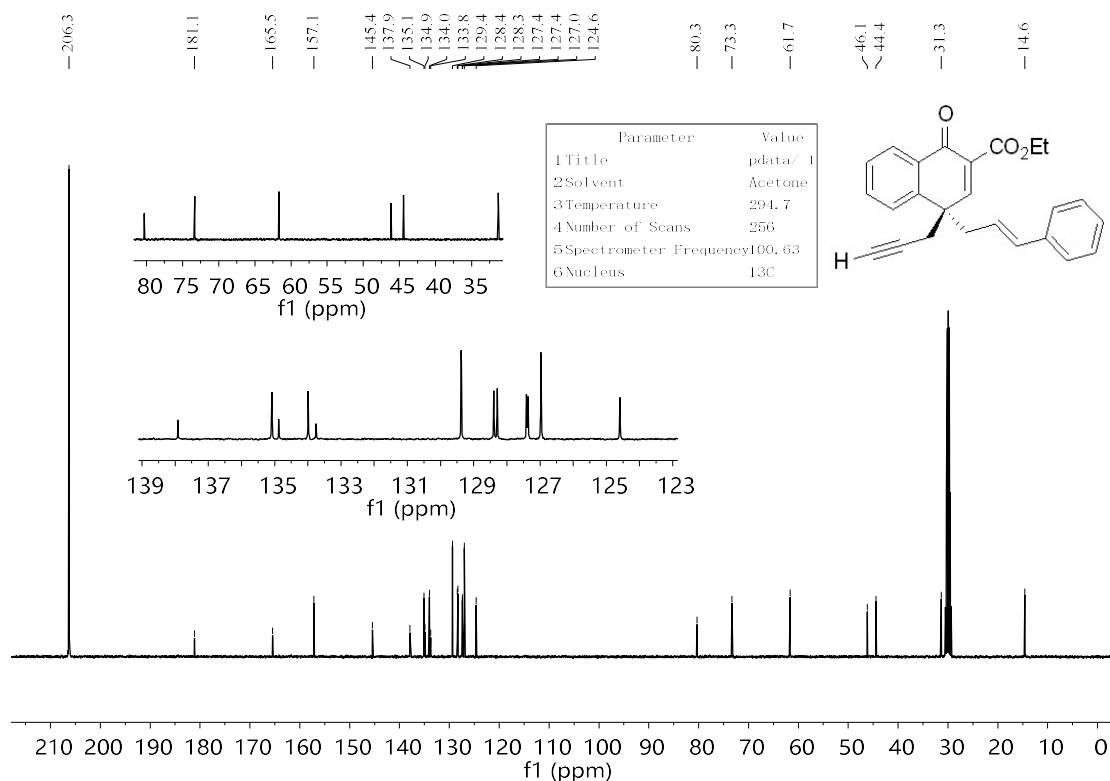



**Ethyl (R)-4-cinnamyl-4-(ethoxymethyl)-1-oxo-1,4-dihydronaphthalene-2-carboxylate (B6)**

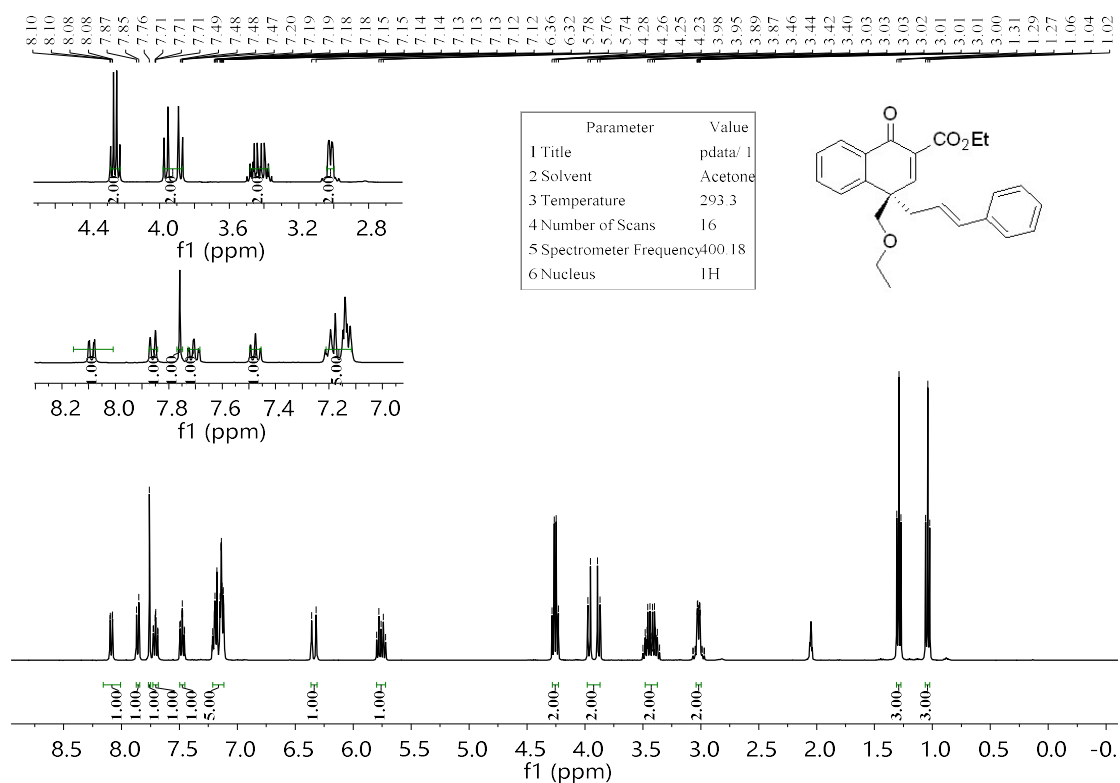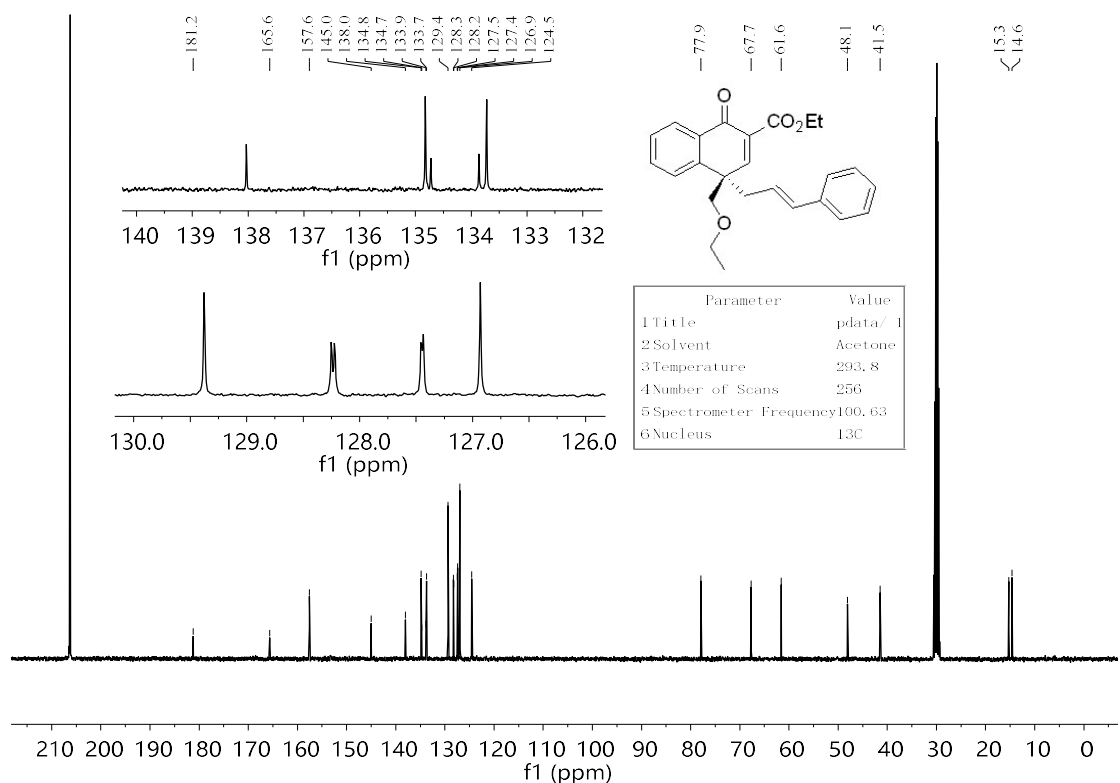

**(R)-2-acetyl-4-cinnamyl-4-(3-phenylprop-2-yn-1-yl)naphthalen-1(4H)-one (B7)**

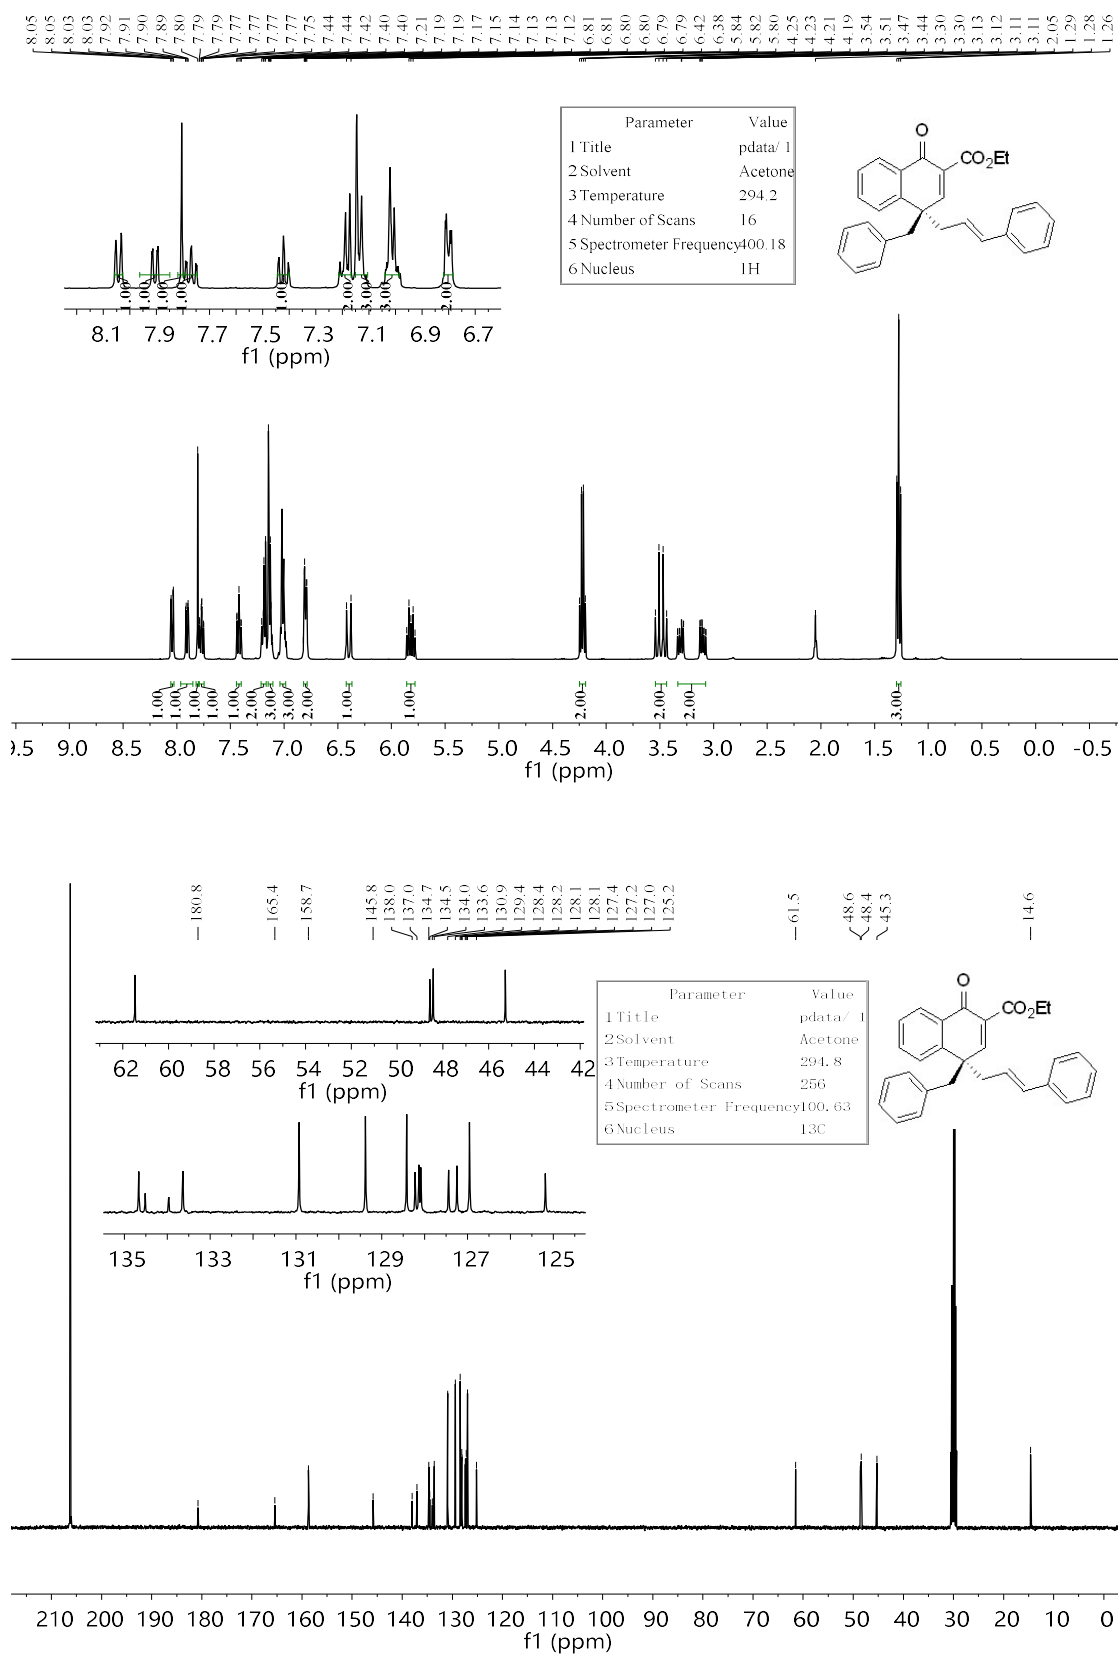

**Ethyl (R)-4-chloro-4-cinnamyl-1-oxo-1,4-dihydronaphthalene-2-carboxylate (B8)**

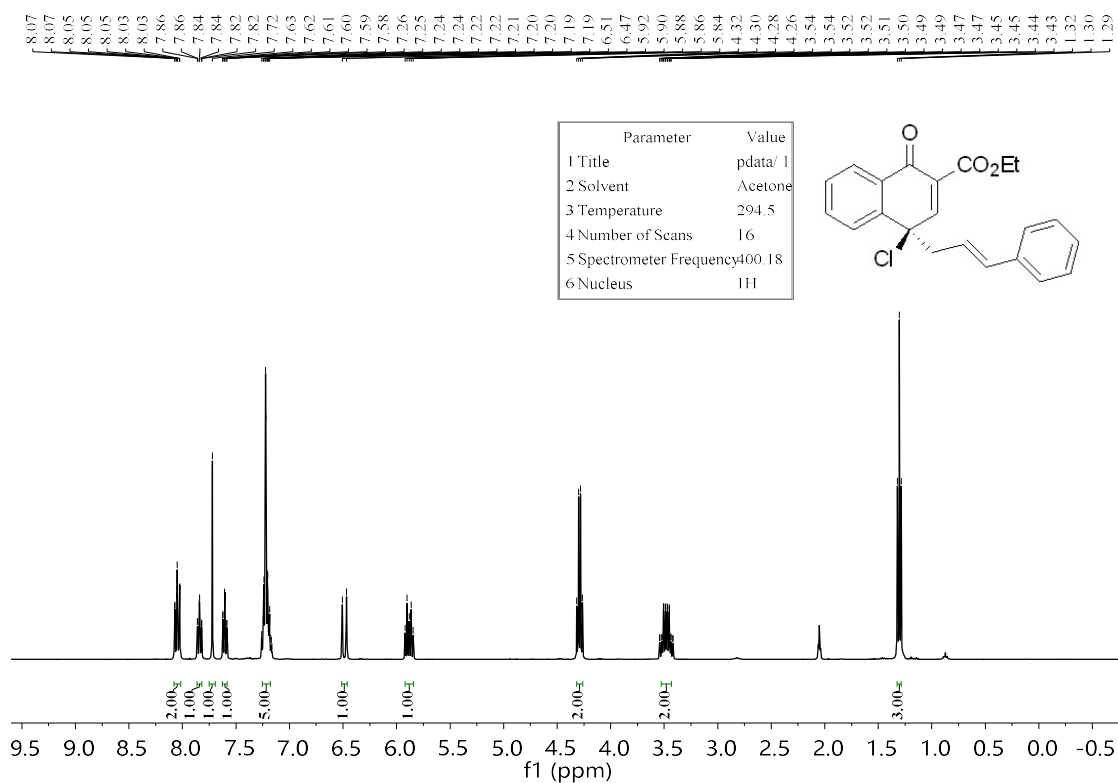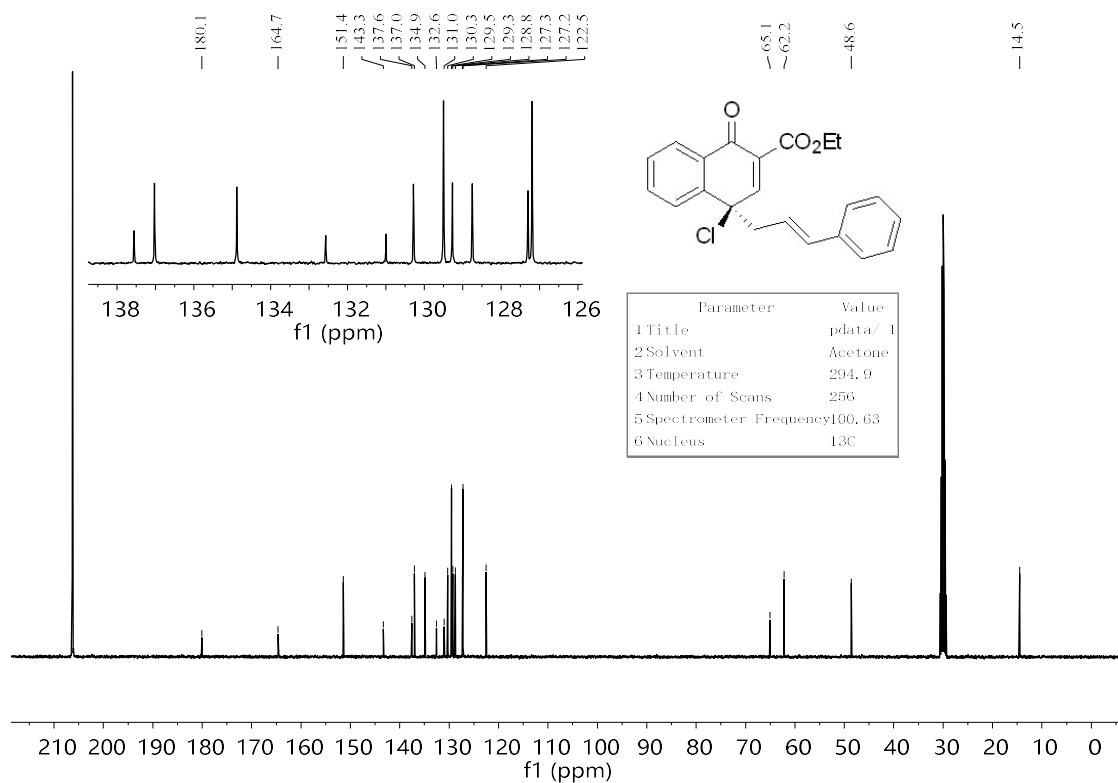

### Ethyl (S)-4-cinnamyl-1-oxo-4-propyl-1,4-dihydronaphthalene-2-carboxylate (B9)

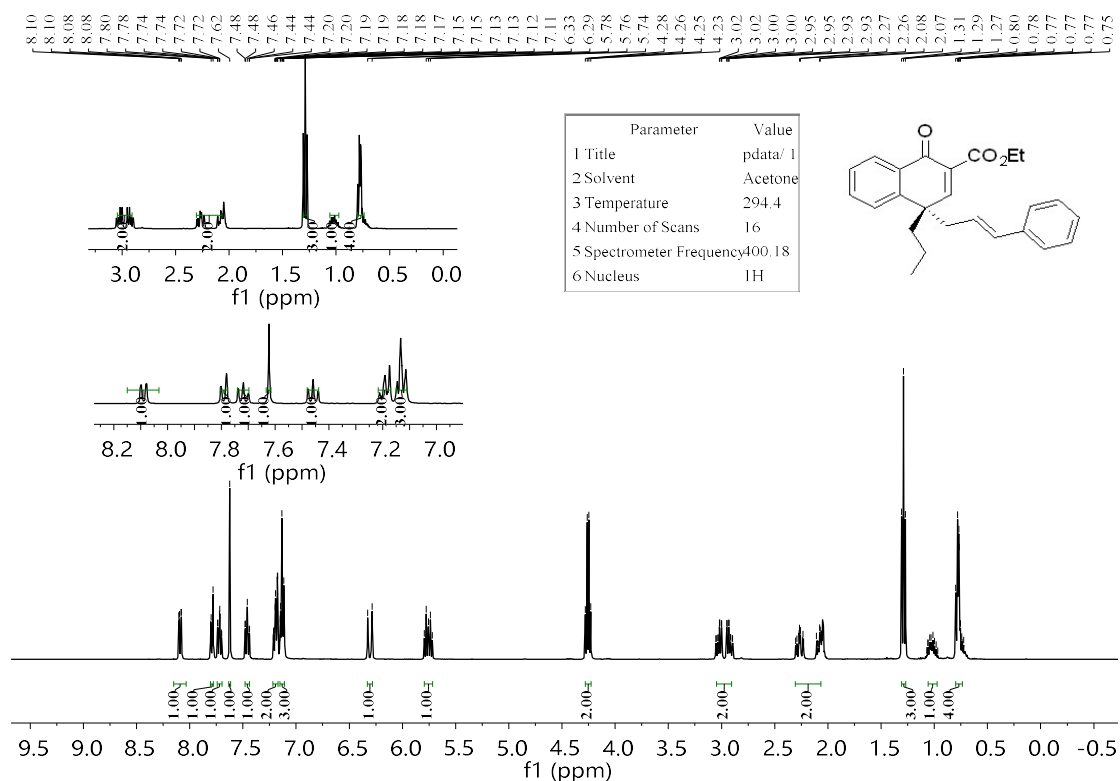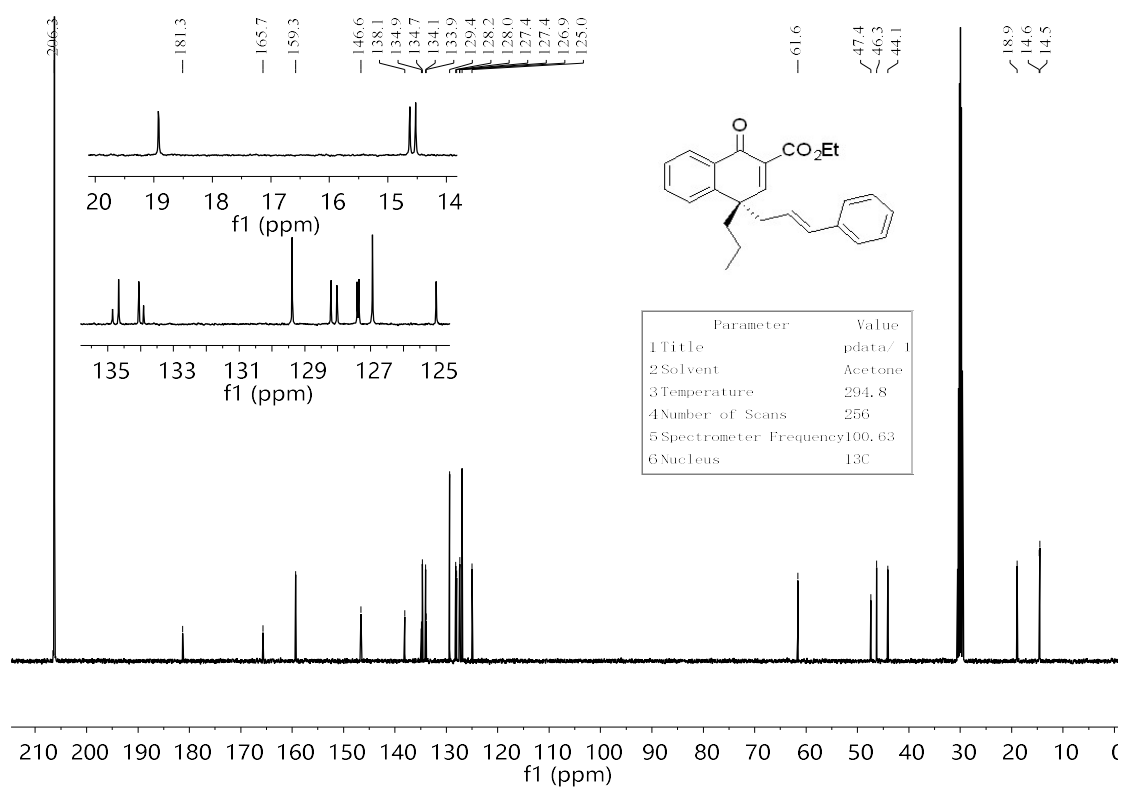

### Ethyl (R)-4-cinnamyl-4-cyclopropyl-1-oxo-1,4-dihydronaphthalene-2-carboxylate (B10)

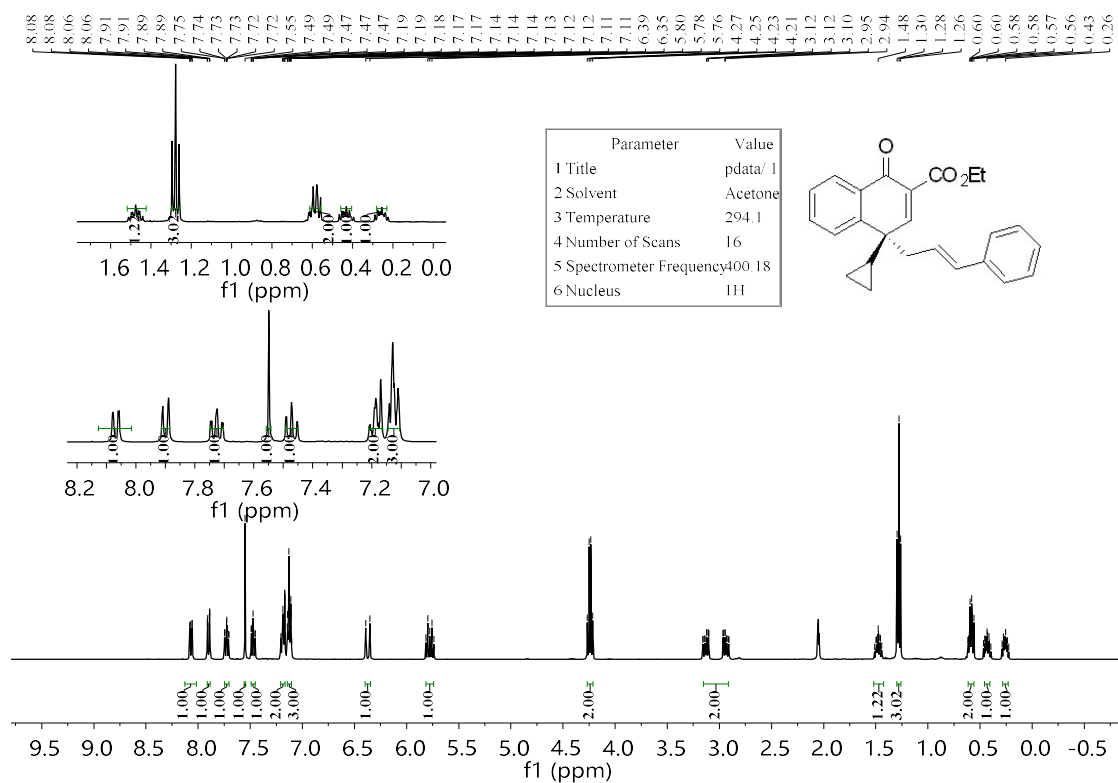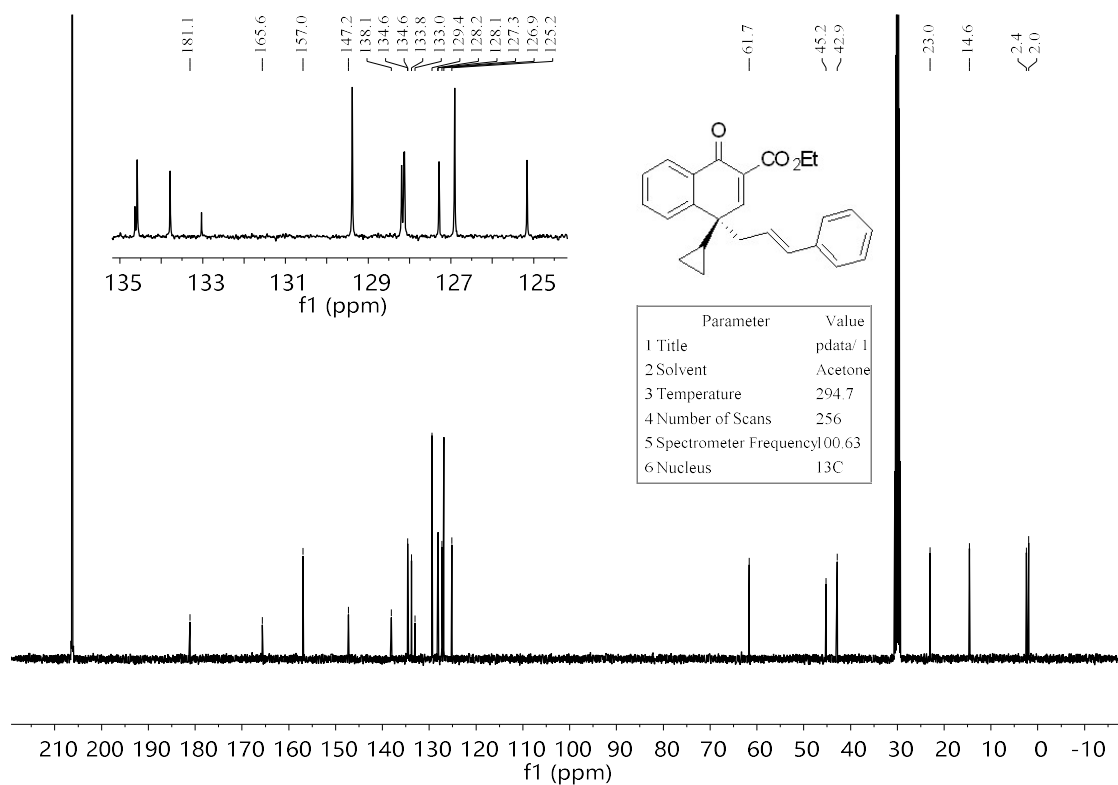

**3-ethyl 1-methyl (R)-1-cinnamyl-4-oxo-1,4-dihydronaphthalene-1,3-dicarboxylate (B11)**

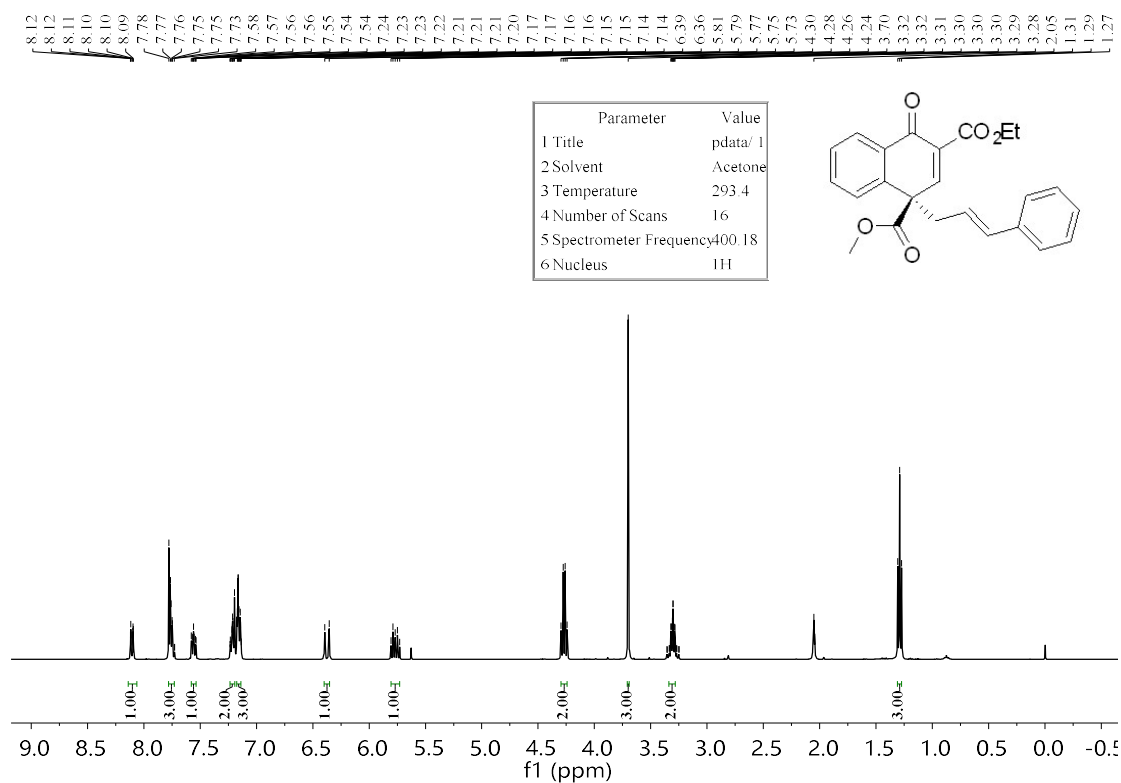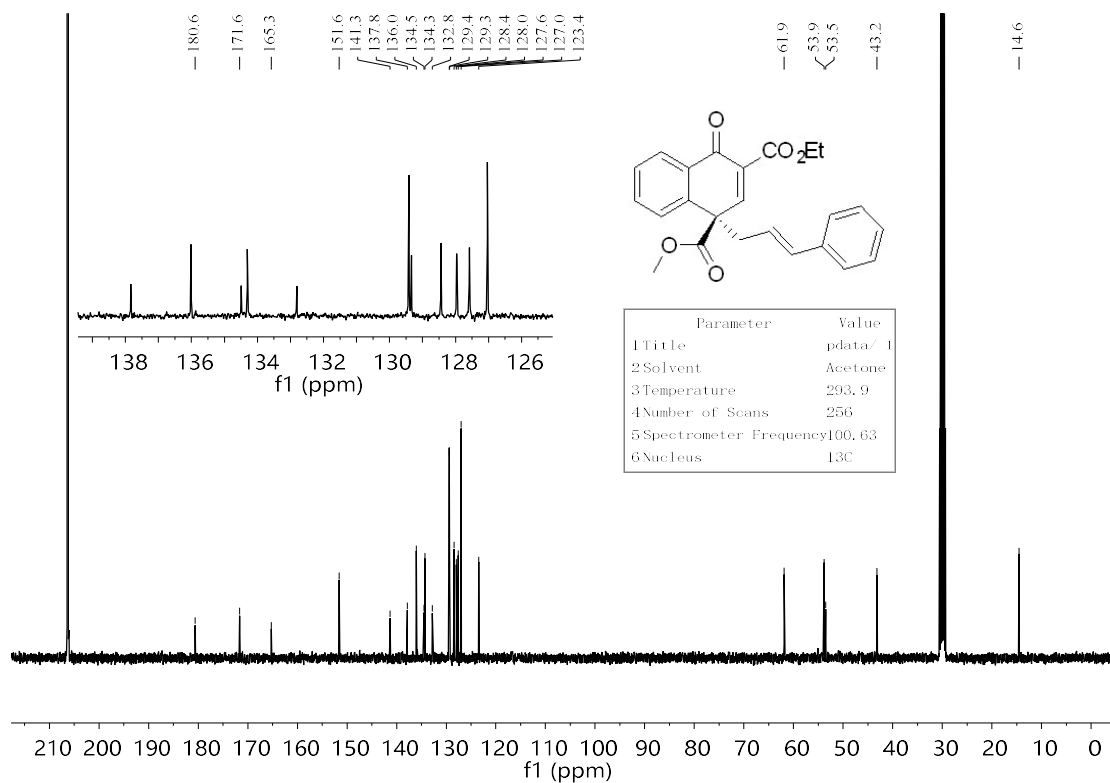

### Ethyl (R)-4-cinnamyl-4-ethoxy-1-oxo-1,4-dihydronaphthalene-2-carboxylate (B12)

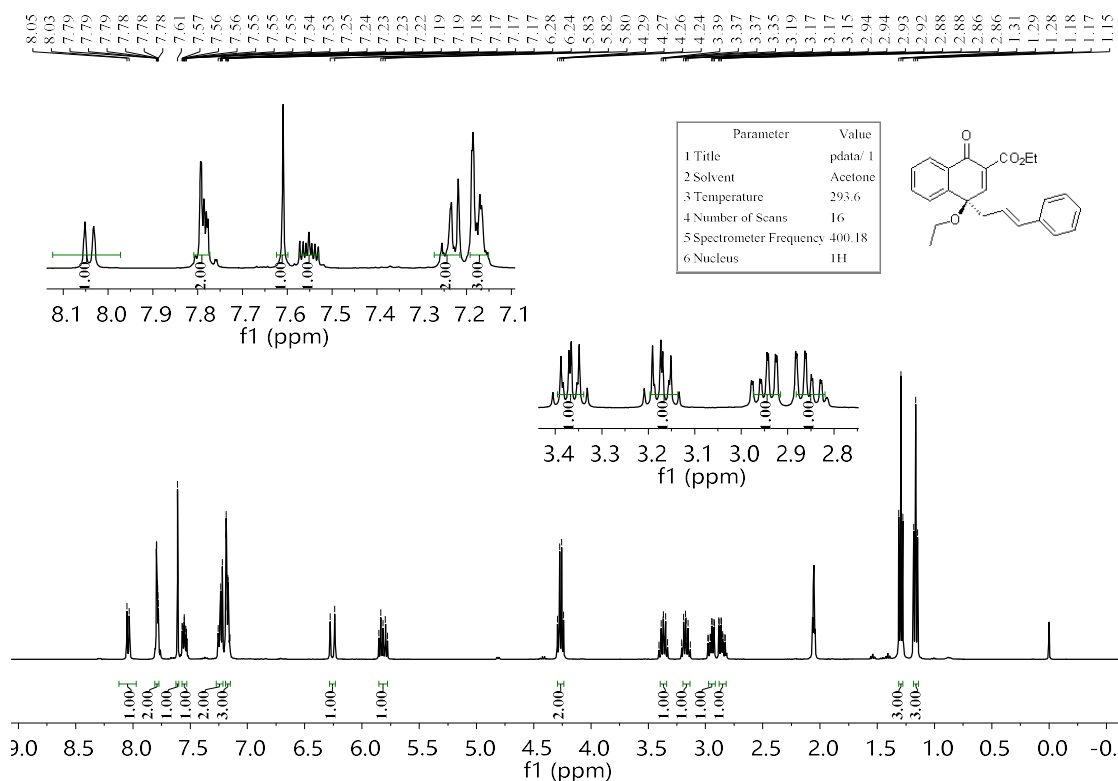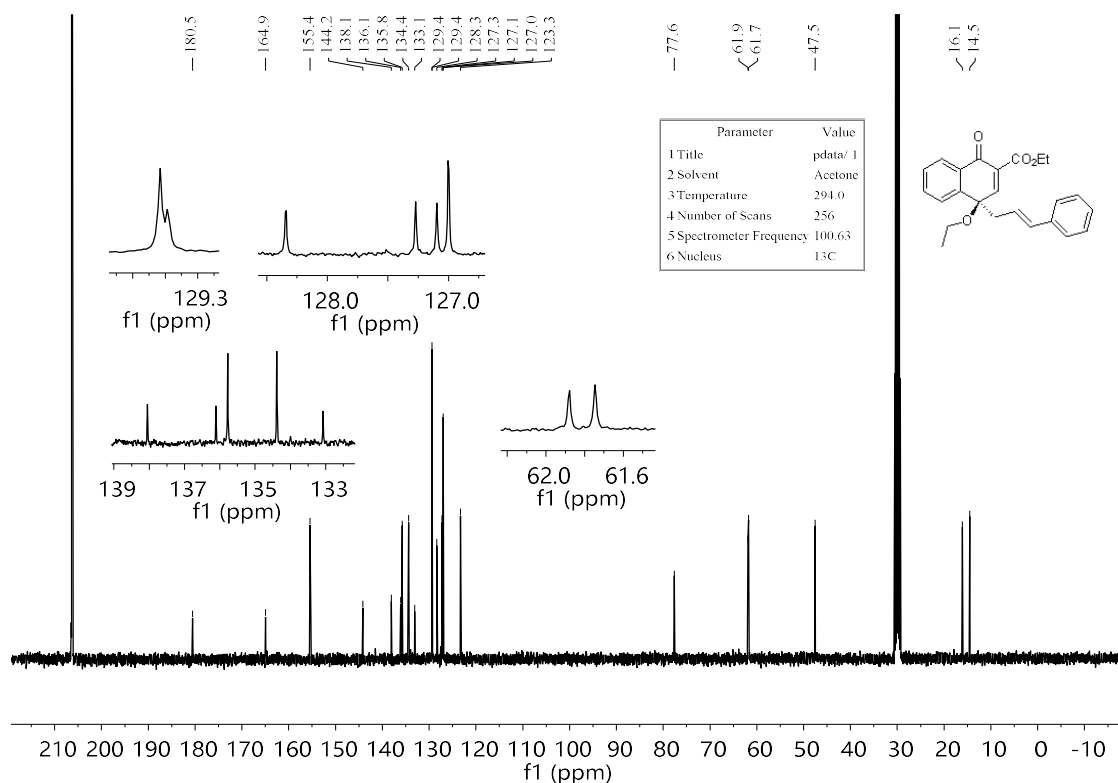

### Ethyl (R)-4-benzyl-4-cinnamyl-6-methyl-1-oxo-1,4-dihydronaphthalene-2-carboxylate (B13)

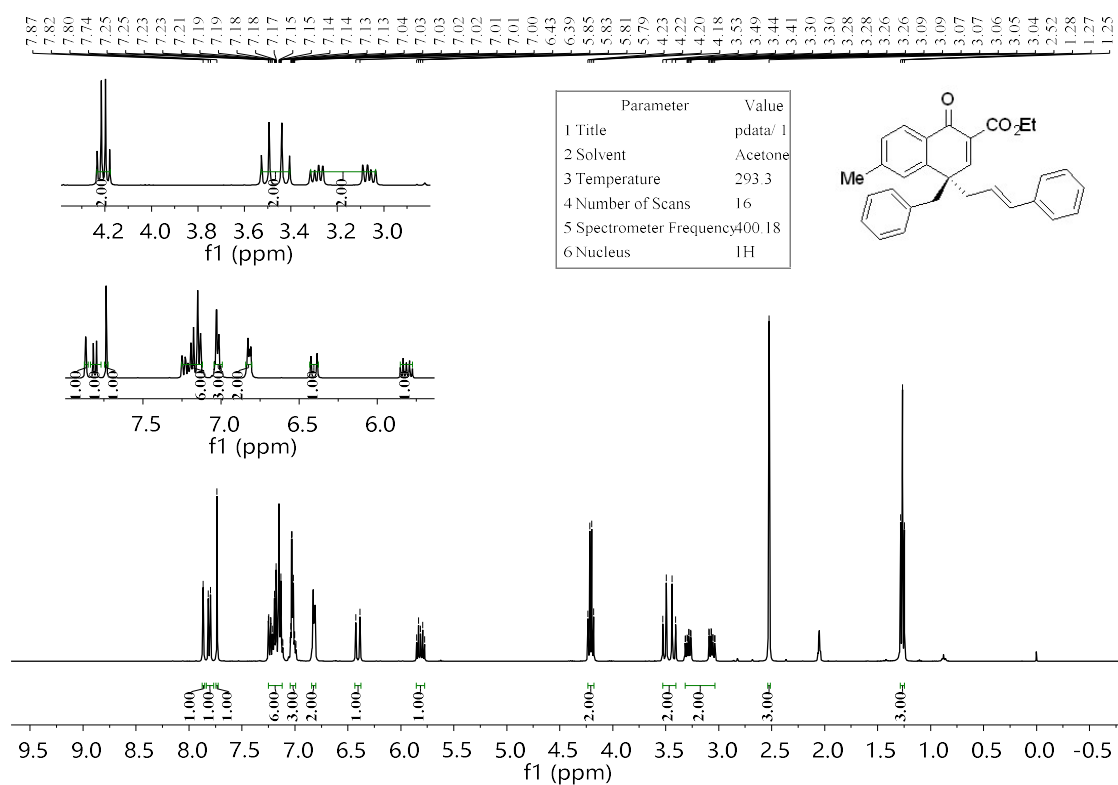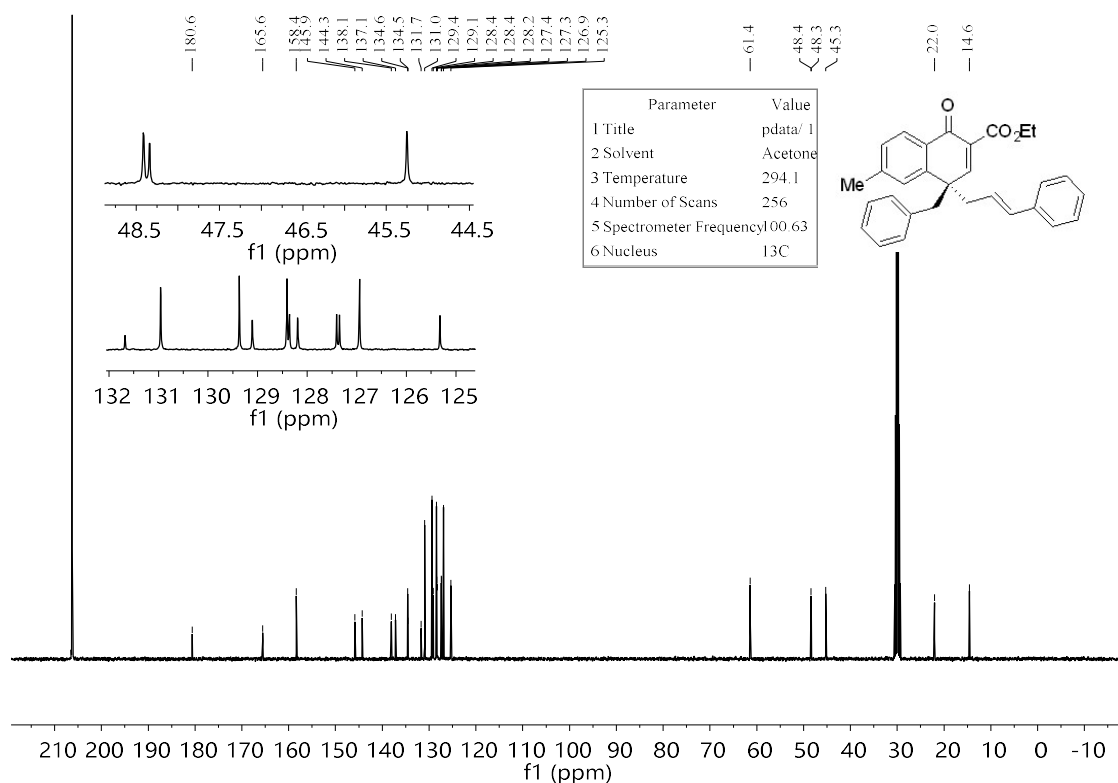



**Ethyl (R)-4-benzyl-6-(tert-butyl)-4-cinnamyl-1-oxo-1,4-dihydronaphthalene-2-carboxylate (B14)**

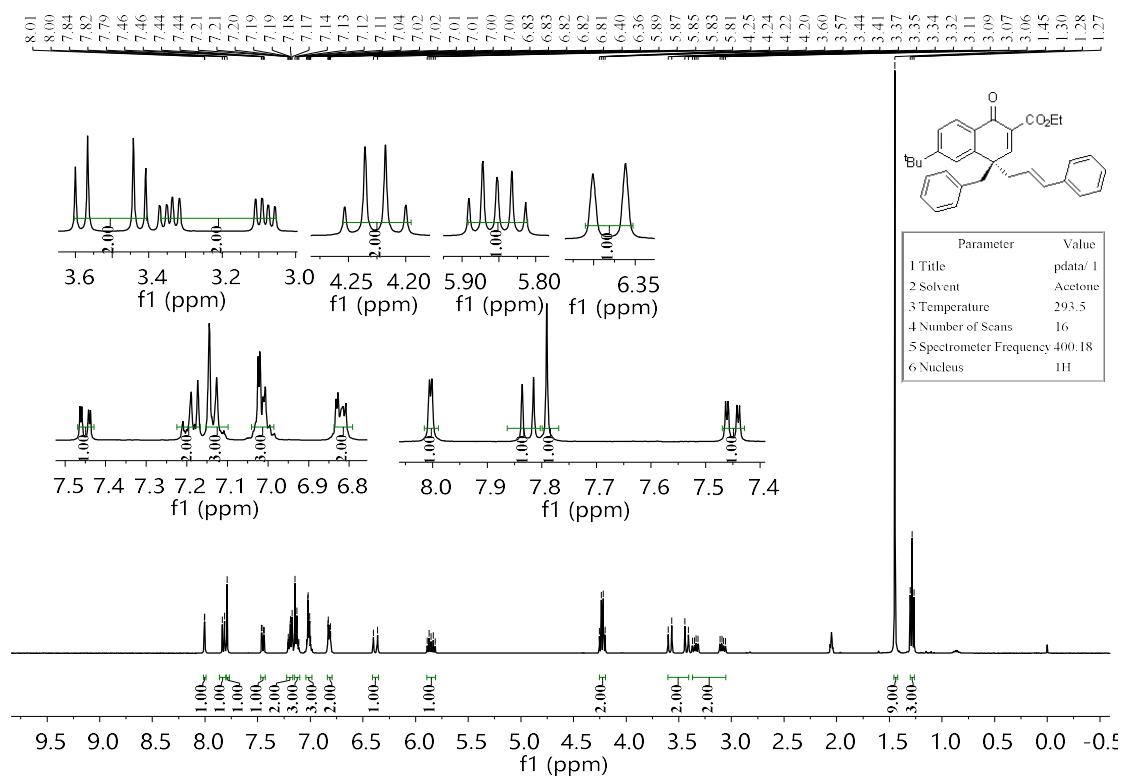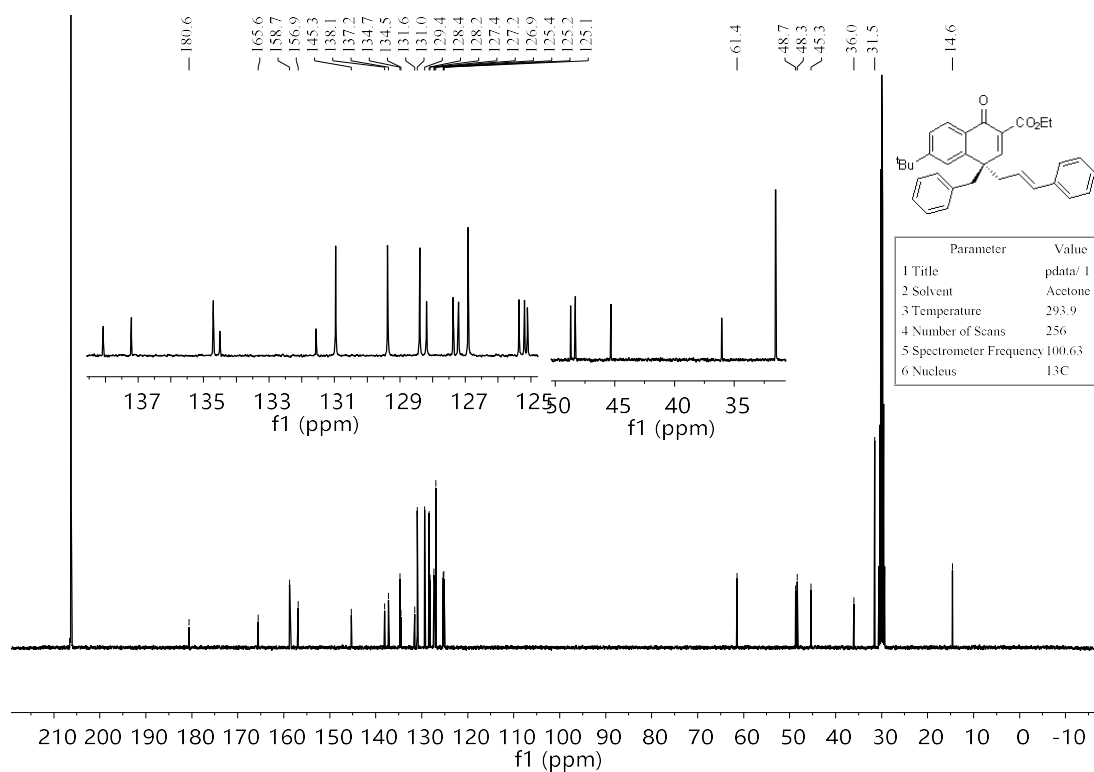

### Ethyl (R)-4-benzyl-4-cinnamyl-1-oxo-6-phenyl-1,4-dihydronaphthalene-2-carboxylate (B15)

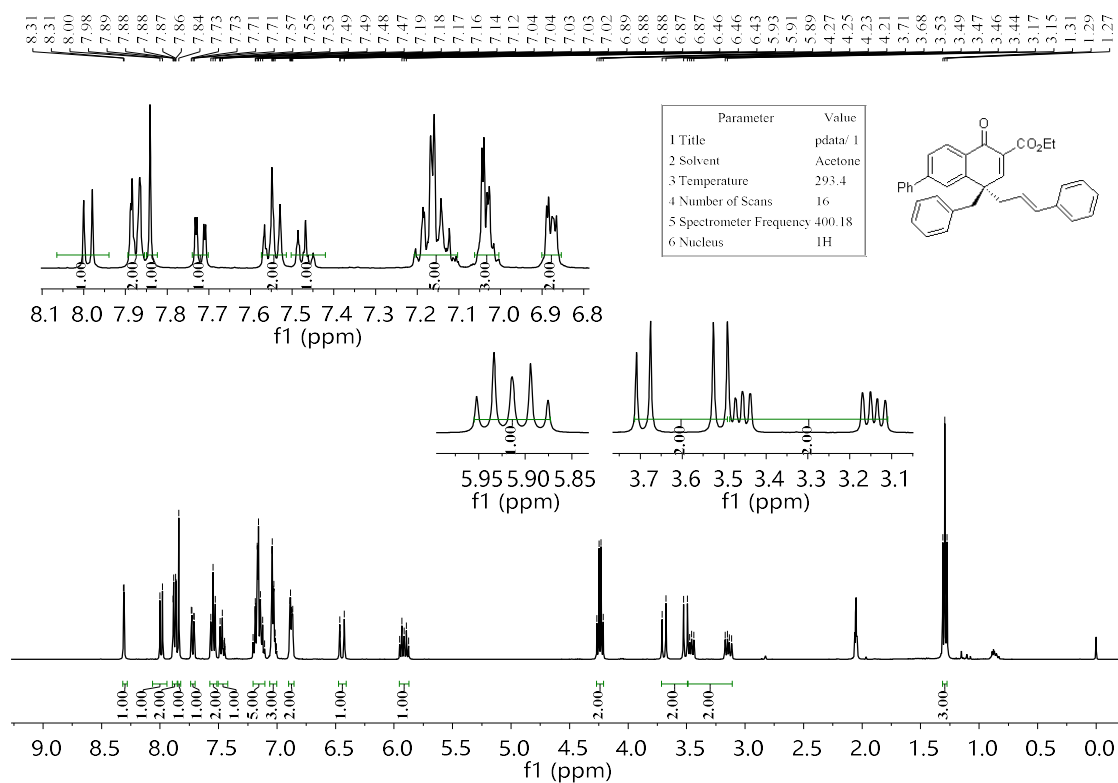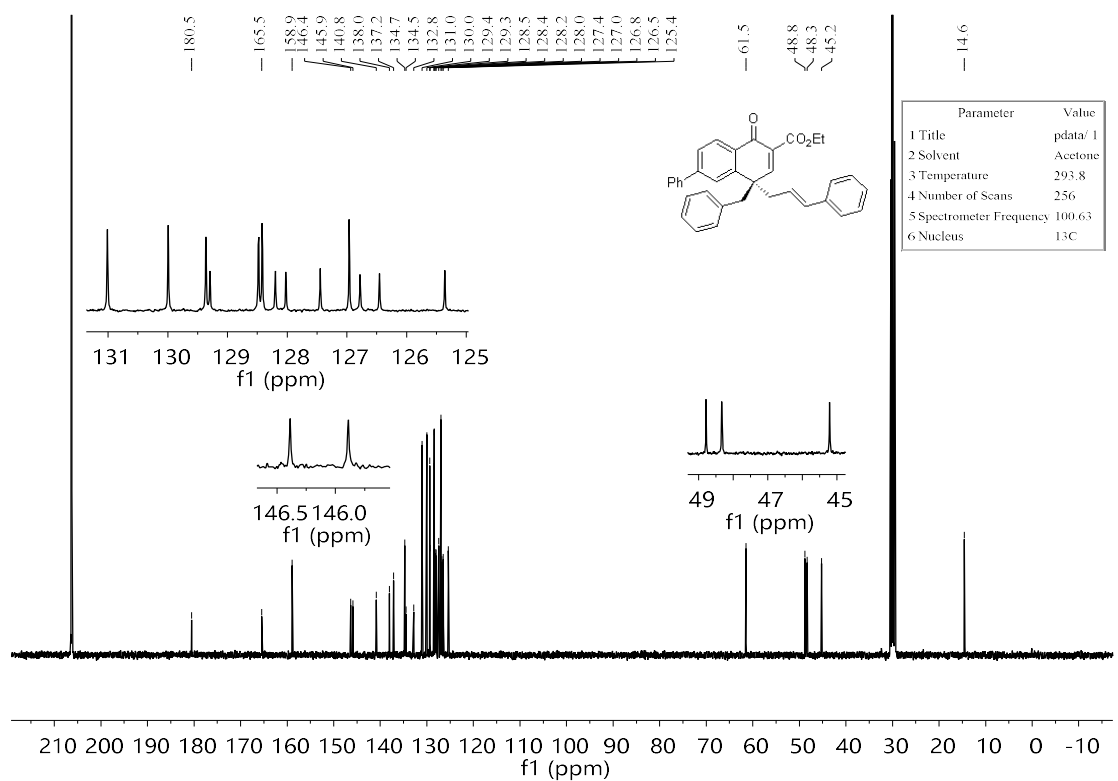

**Ethyl (R)-4-benzyl-4-cinnamyl-6-methoxy-1-oxo-1,4-dihydronaphthalene-2-carboxylate (B16)**

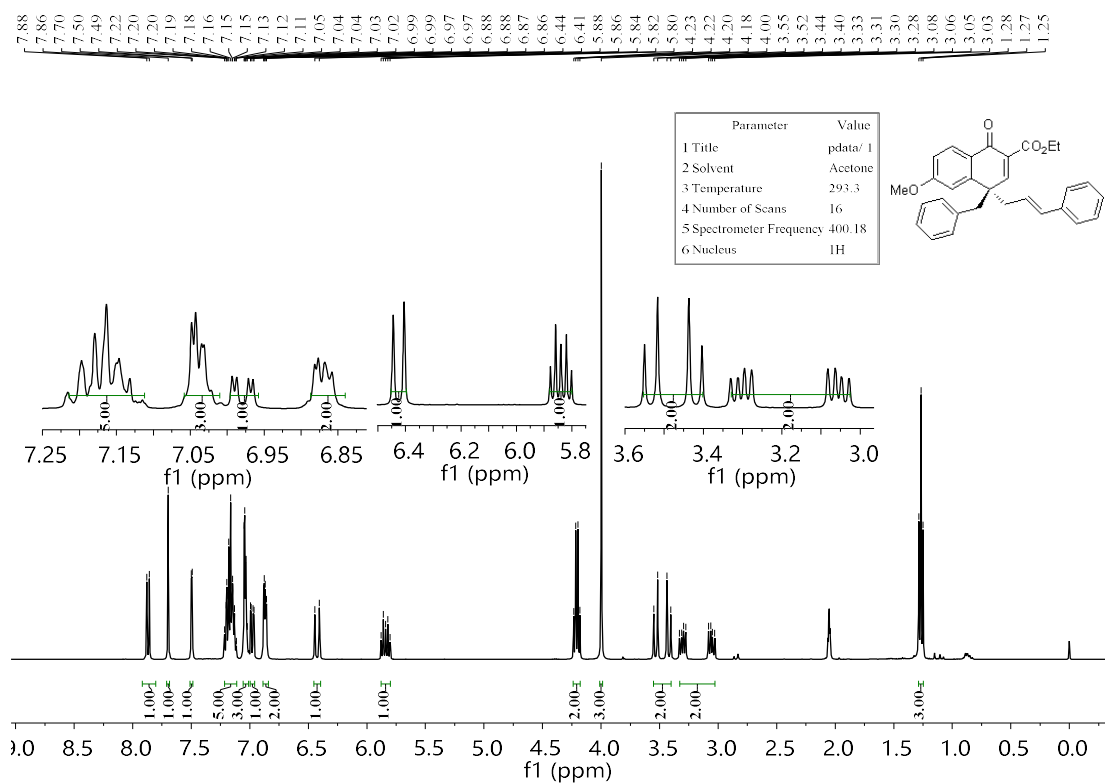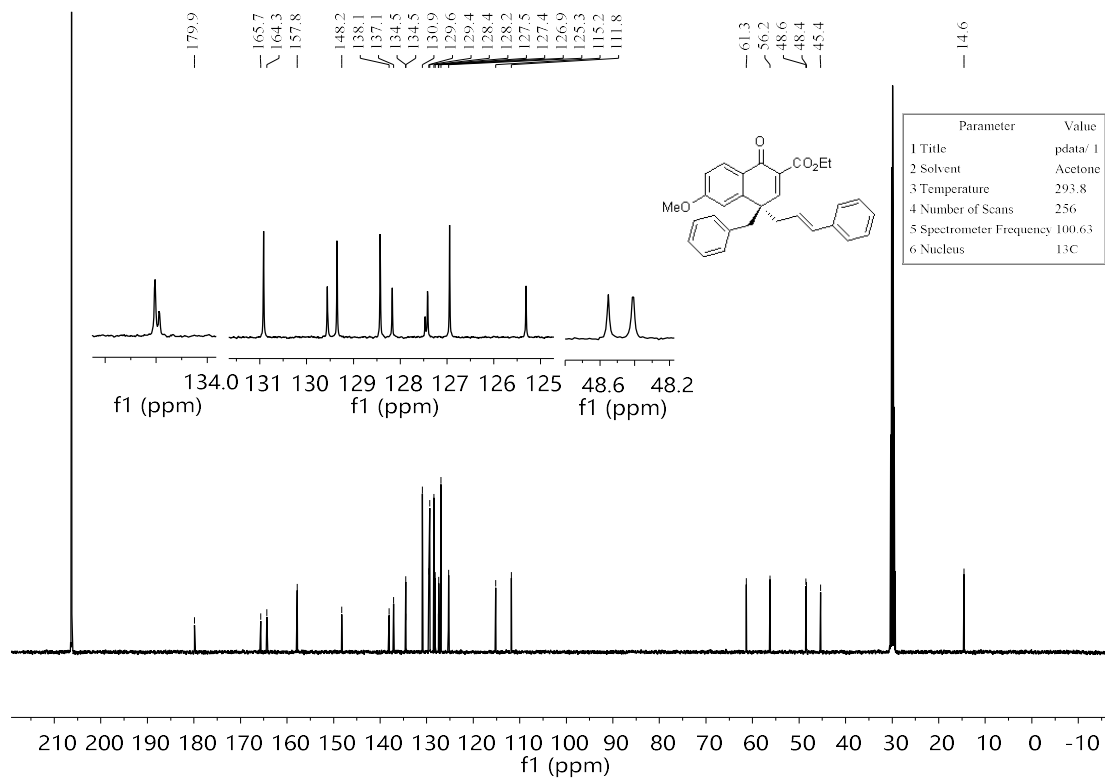

**Ethyl (R)-4-benzyl-6-chloro-4-cinnamyl-1-oxo-1,4-dihydronaphthalene-2-carboxylate (B17)**

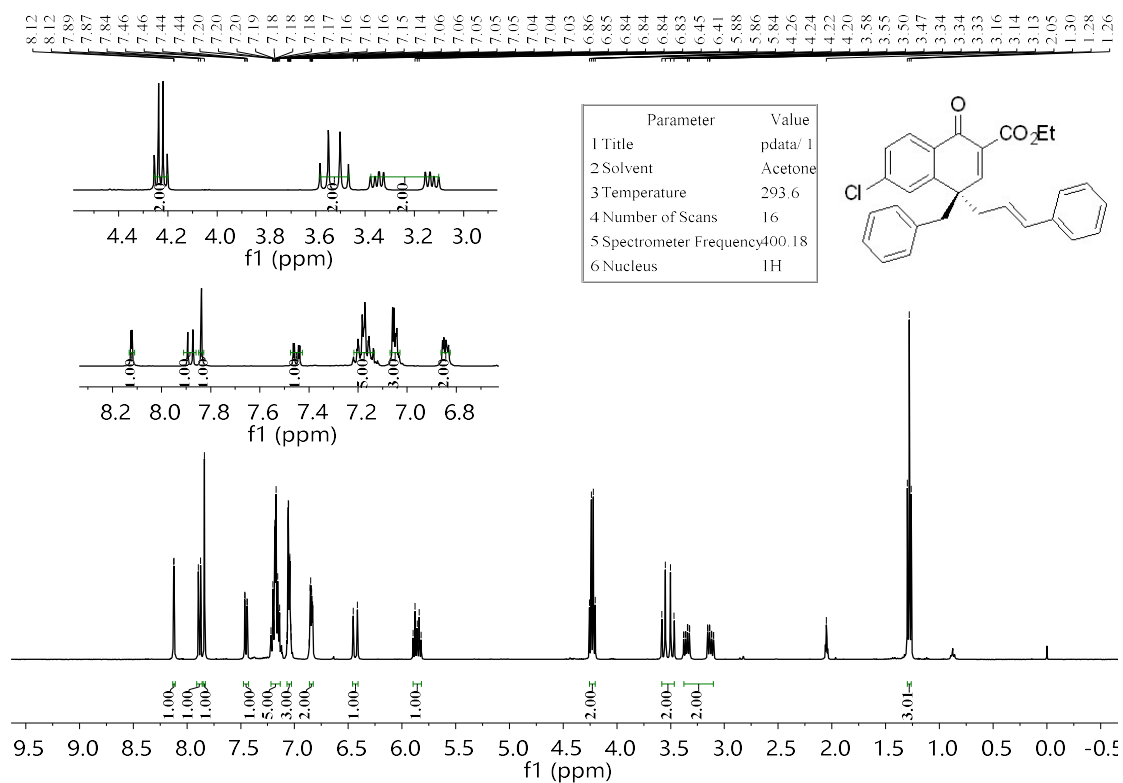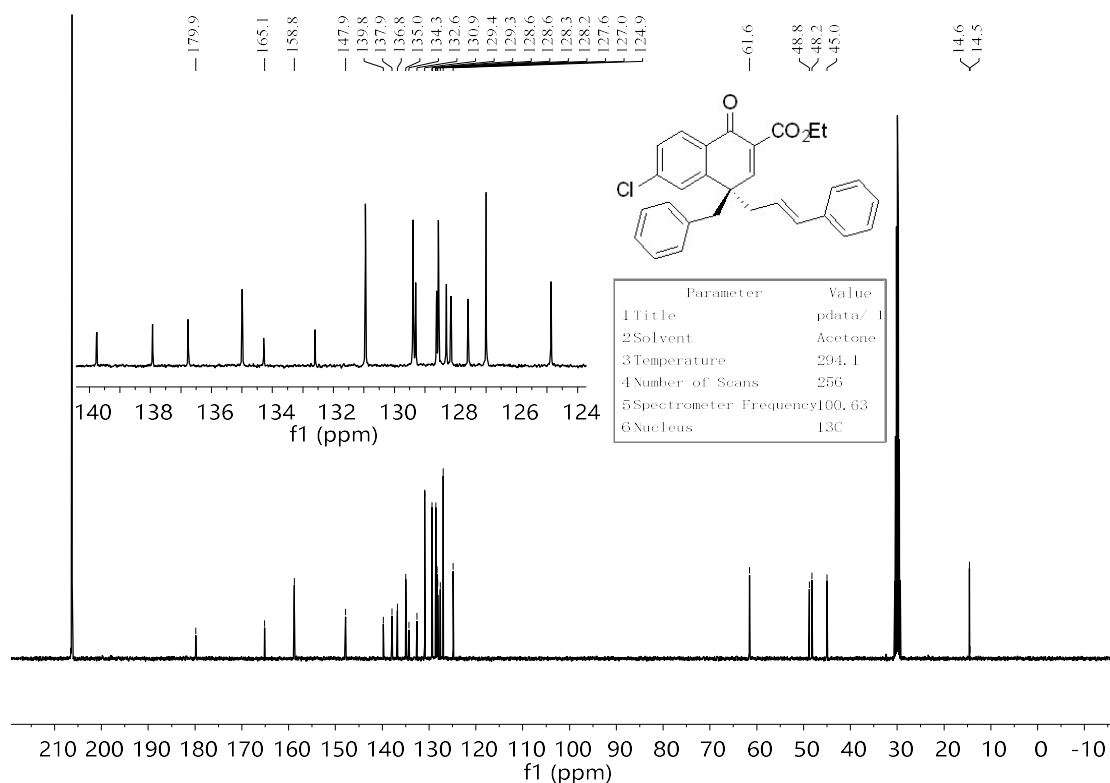

**Ethyl (R)-4-benzyl-4-cinnamyl-6-cyano-1,4-dihydronaphthalene-2-carboxylate (B18)**

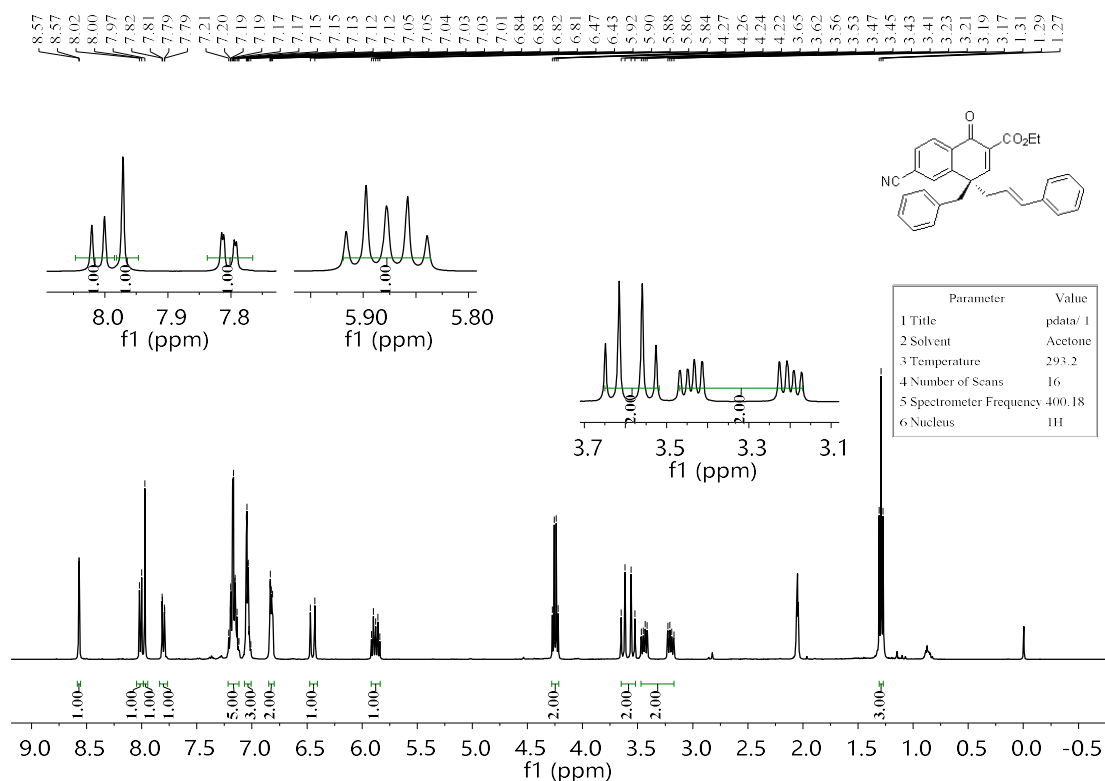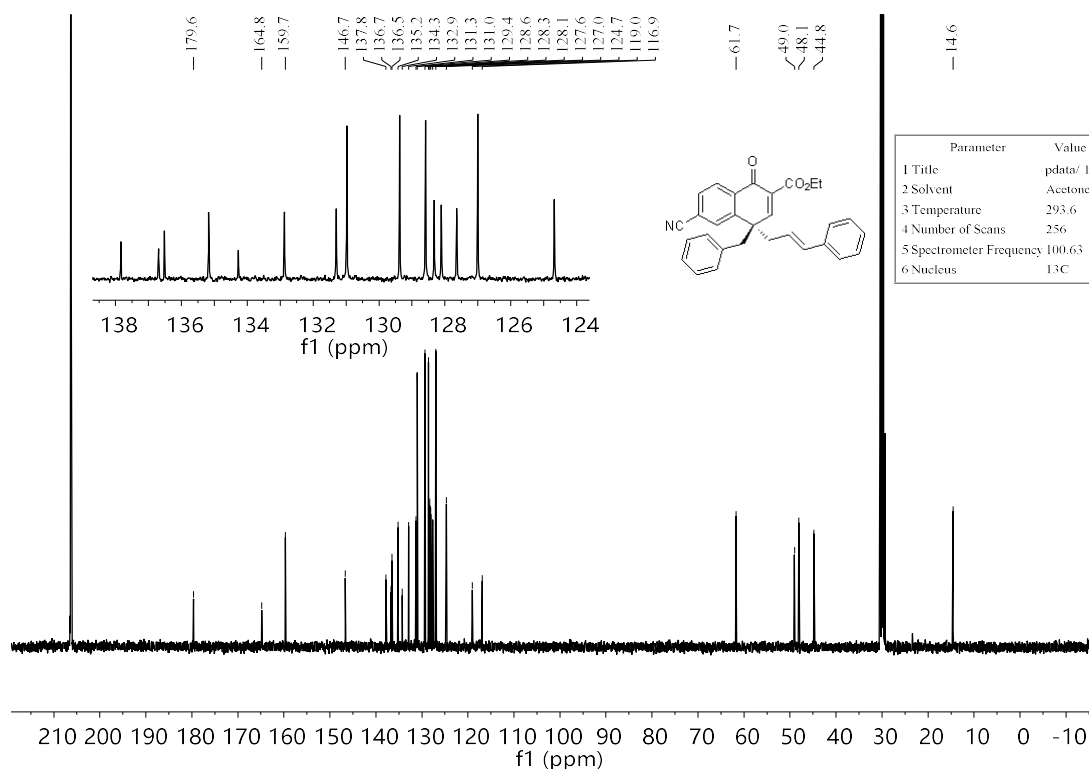

**Ethyl (R)-4-benzyl-4-cinnamyl-8-methyl-1-oxo-1,4-dihydronaphthalene-2-carboxylate (B19)**

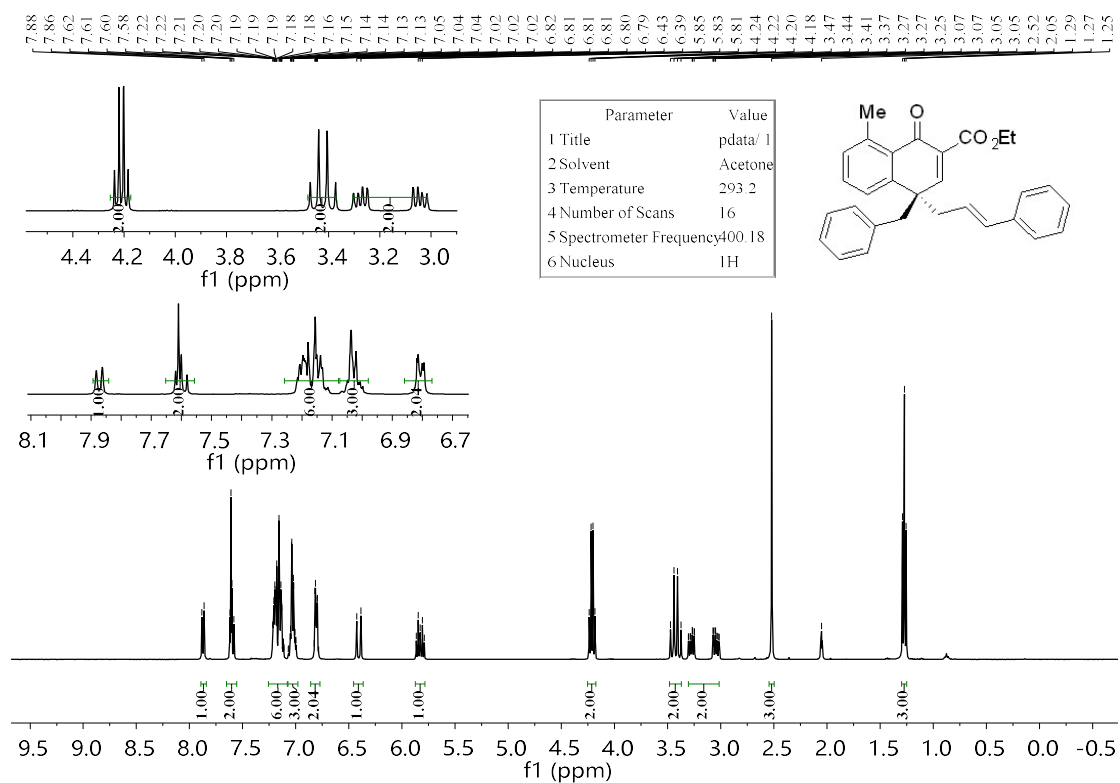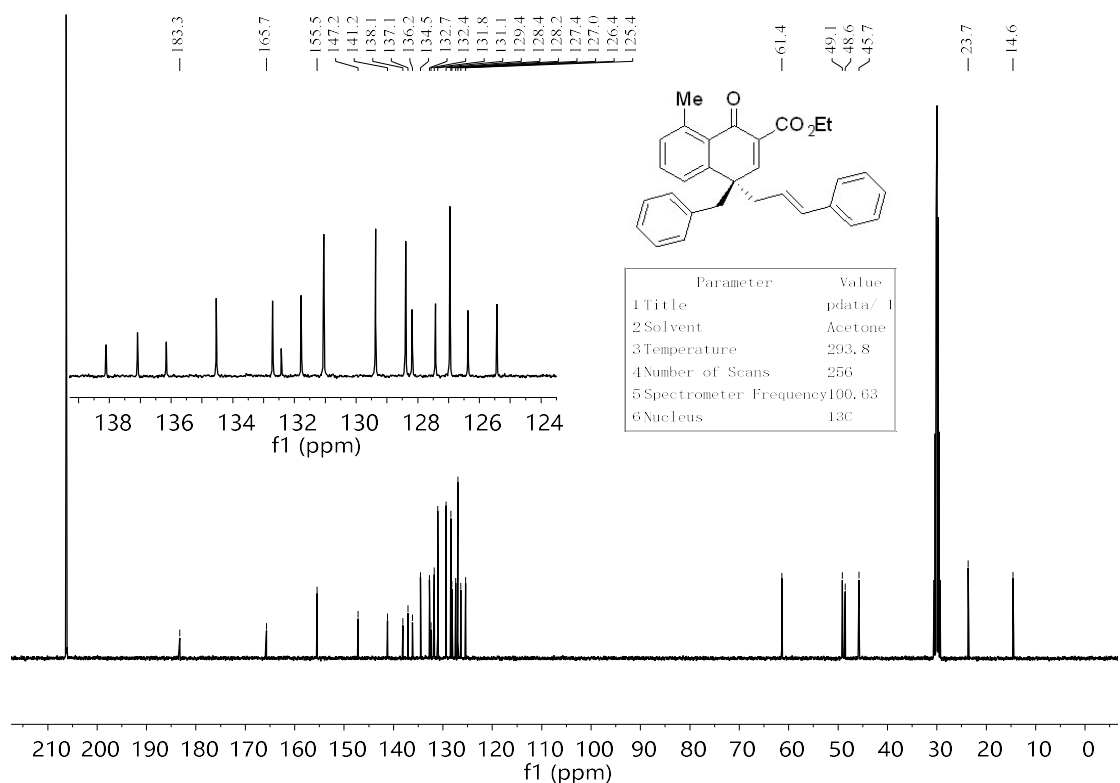

**Ethyl (R,E)-4-(3-(4-nitrophenyl)allyl)-1-oxo-4-(3-phenylprop-2-yn-1-yl)-1,4-dihydronaphthalene-2-carboxylate (B20)**

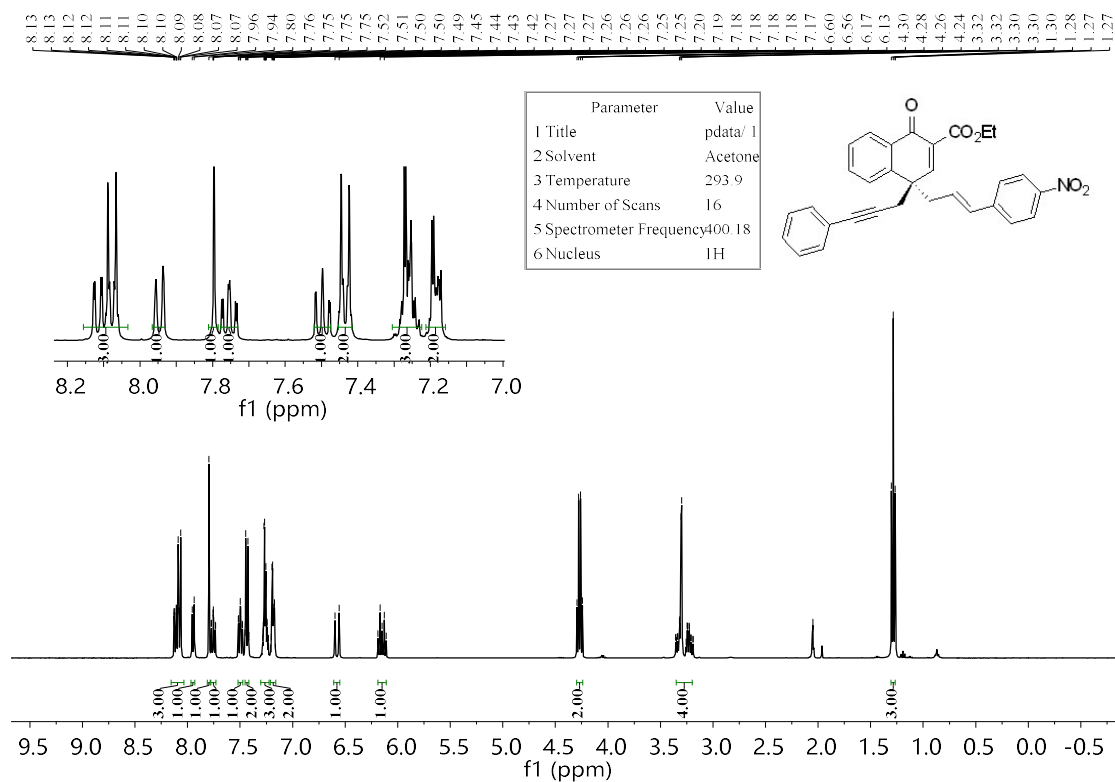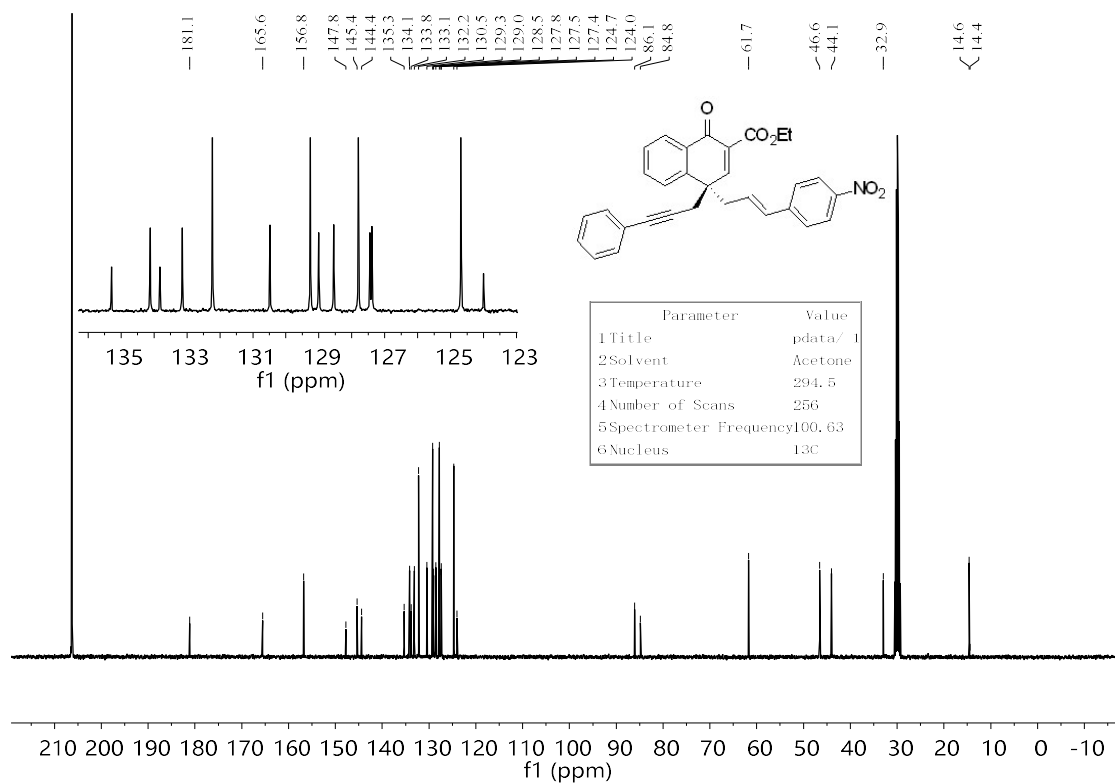

**Ethyl (R,E)-1-oxo-4-(3-phenylprop-2-yn-1-yl)-4-(3-(4-(trifluoromethyl)phenyl)allyl)-1,4-dihydronaphthalene-2-carboxylate (B21)**

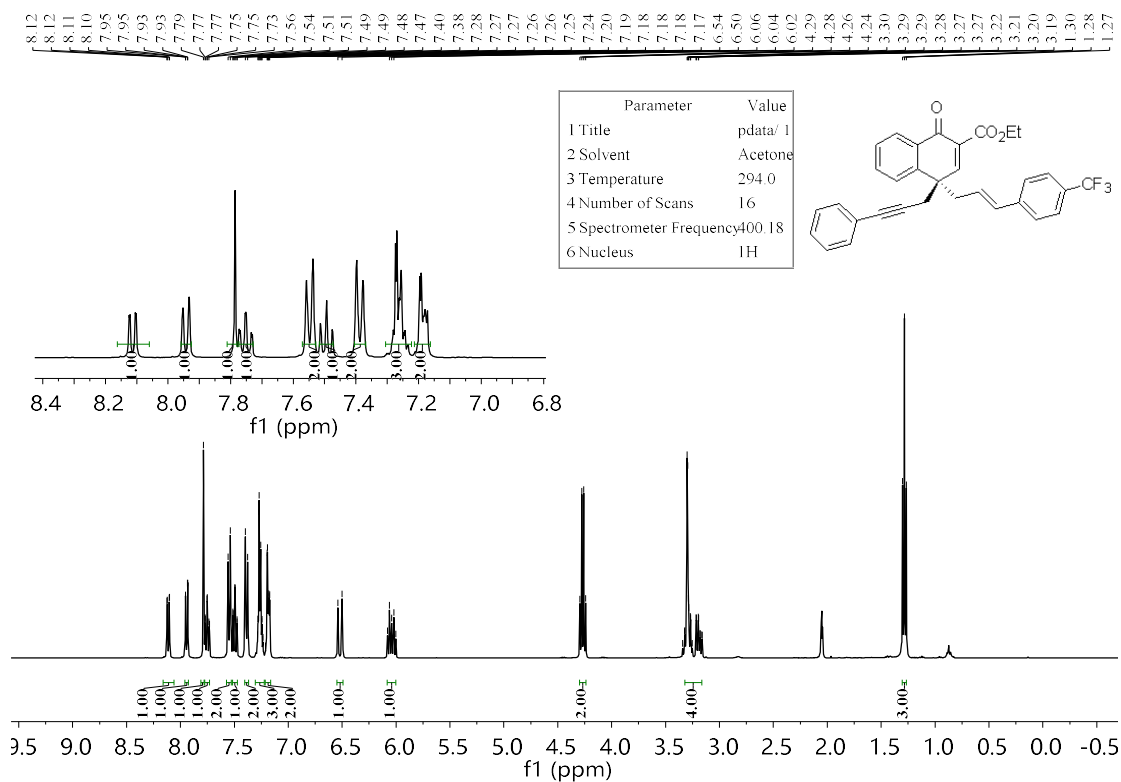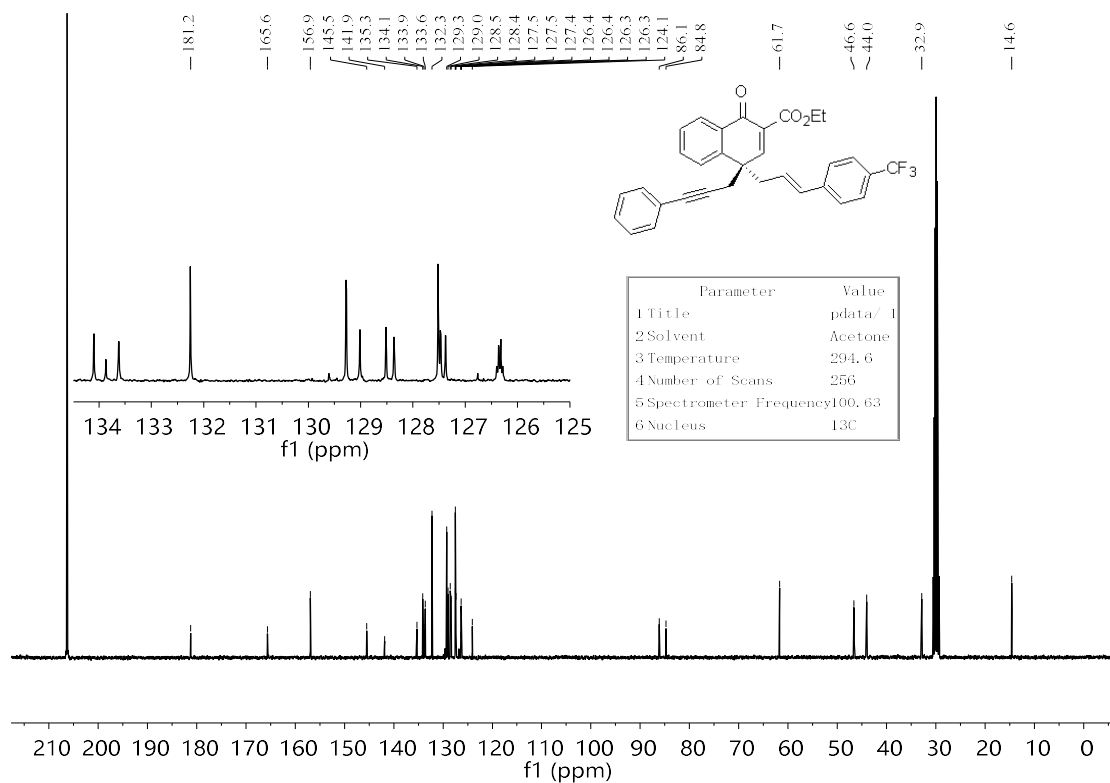



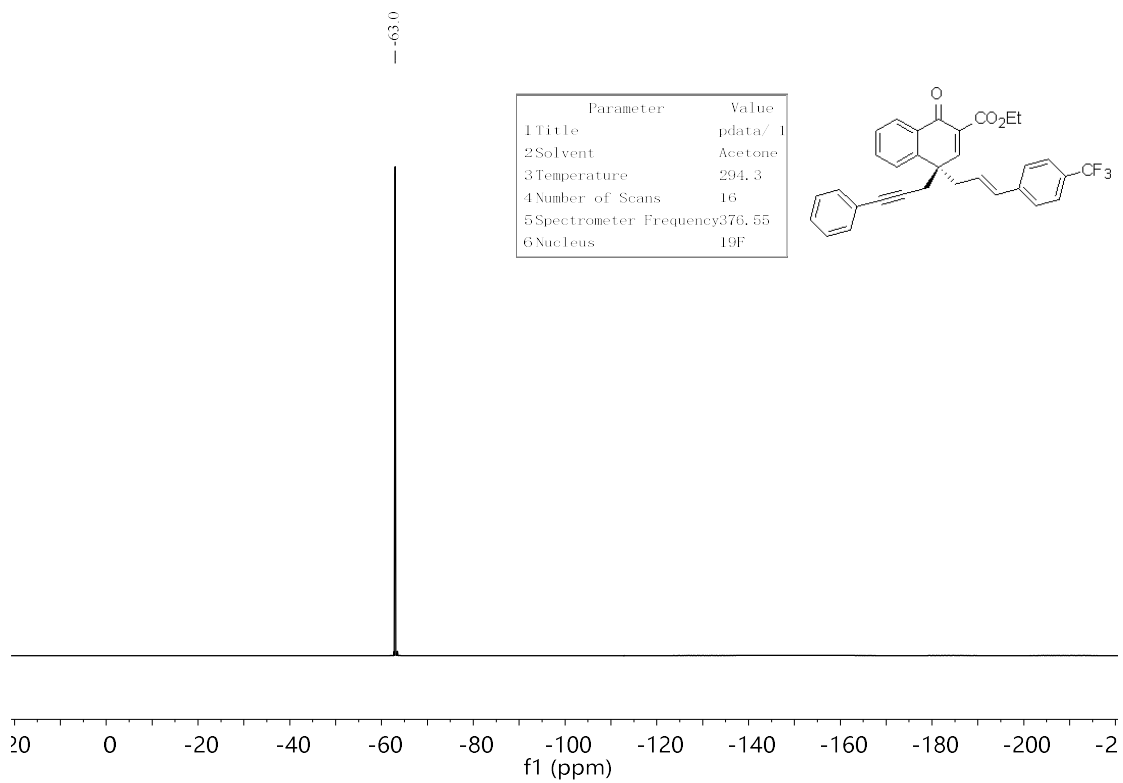

**Ethyl (R,E)-4-(3-(4-fluorophenyl)allyl)-1-oxo-4-(3-phenylprop-2-yn-1-yl)-1,4-dihydronaphthalene-2-carboxylate (B22)**

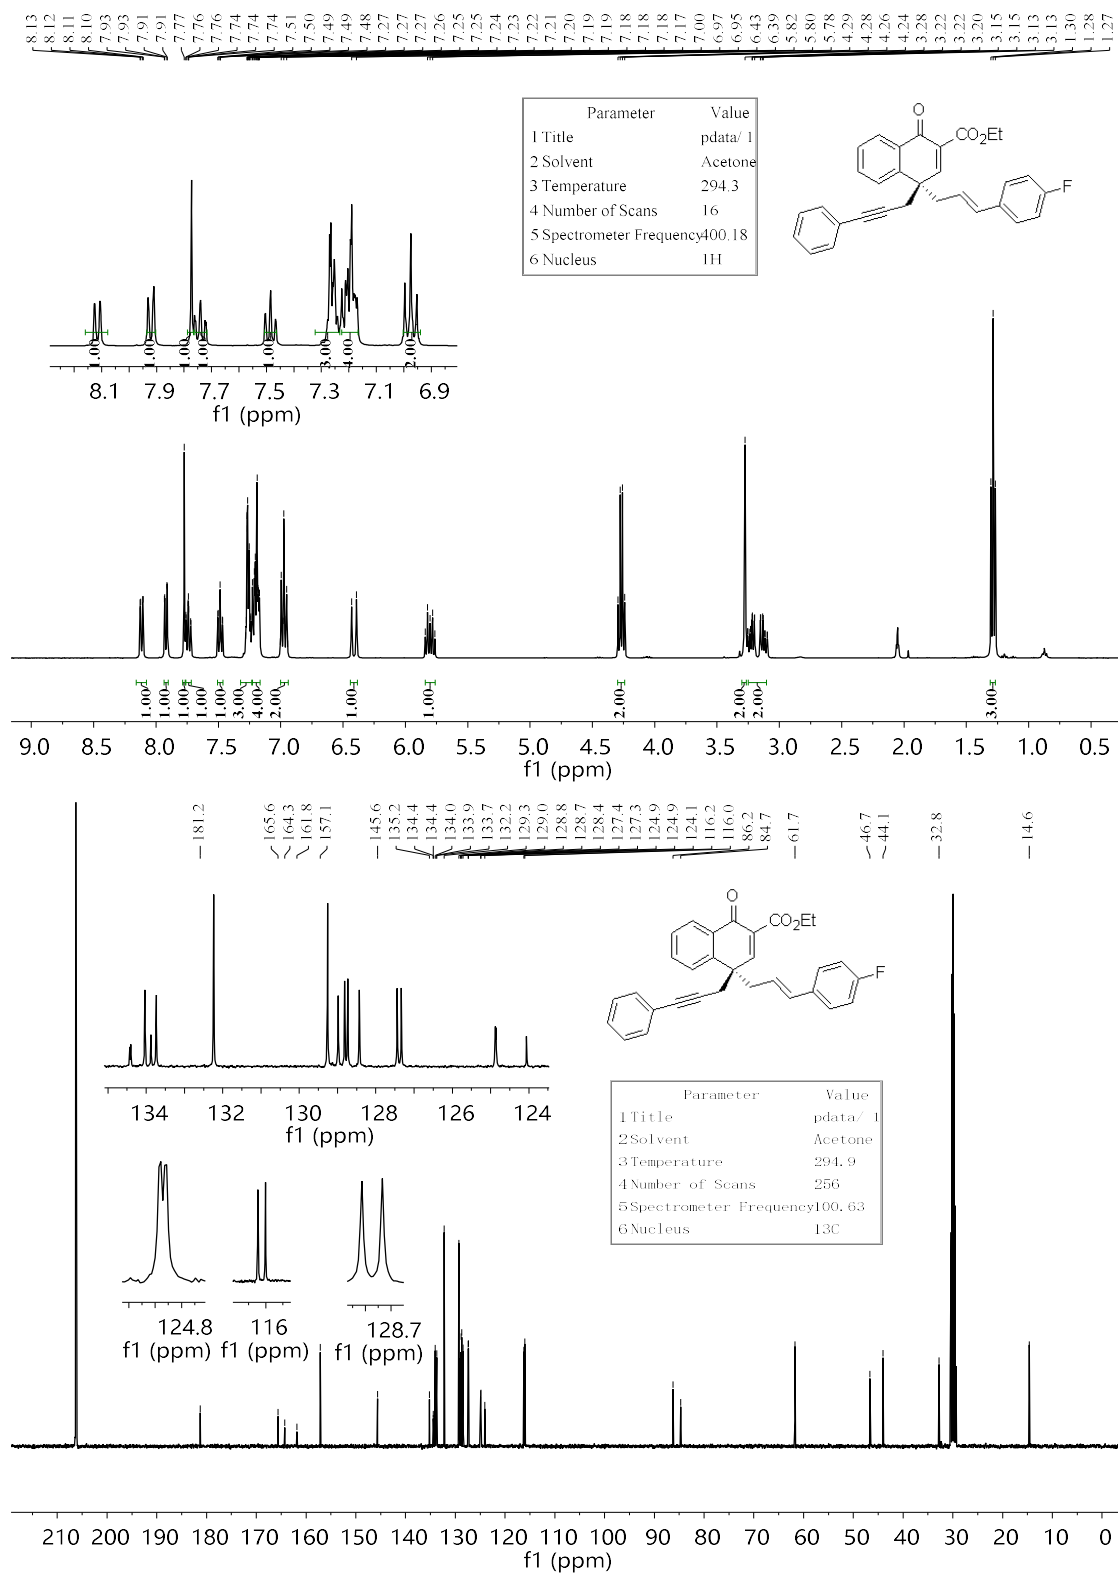

-116

| Parameter                | Value           |
|--------------------------|-----------------|
| 1 Title                  | pdata/1         |
| 2 Solvent                | Acetone         |
| 3 Temperature            | 294.5           |
| 4 Number of Scans        | 16              |
| 5 Spectrometer Frequency | 376.55          |
| 6 Nucleus                | <sup>19</sup> F |

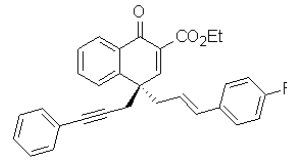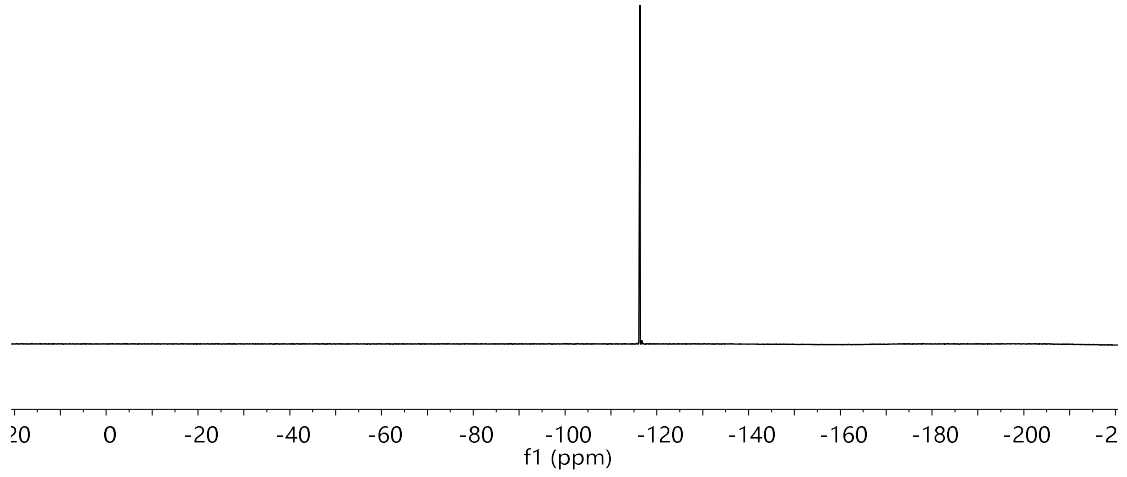

Ethyl

**(R,E)-4-(3-(4-bromophenyl)allyl)-1-oxo-4-(3-phenylprop-2-yn-1-yl)-1,4-dihydronaphthalene-2-carboxylate (B23)**

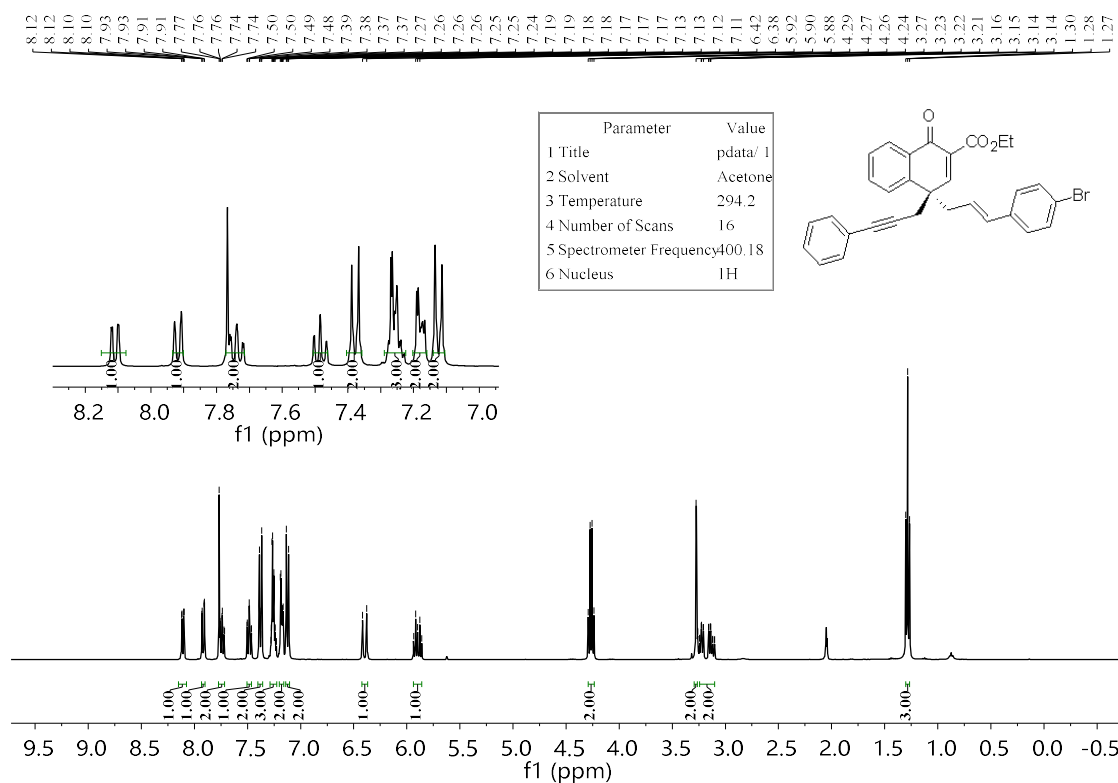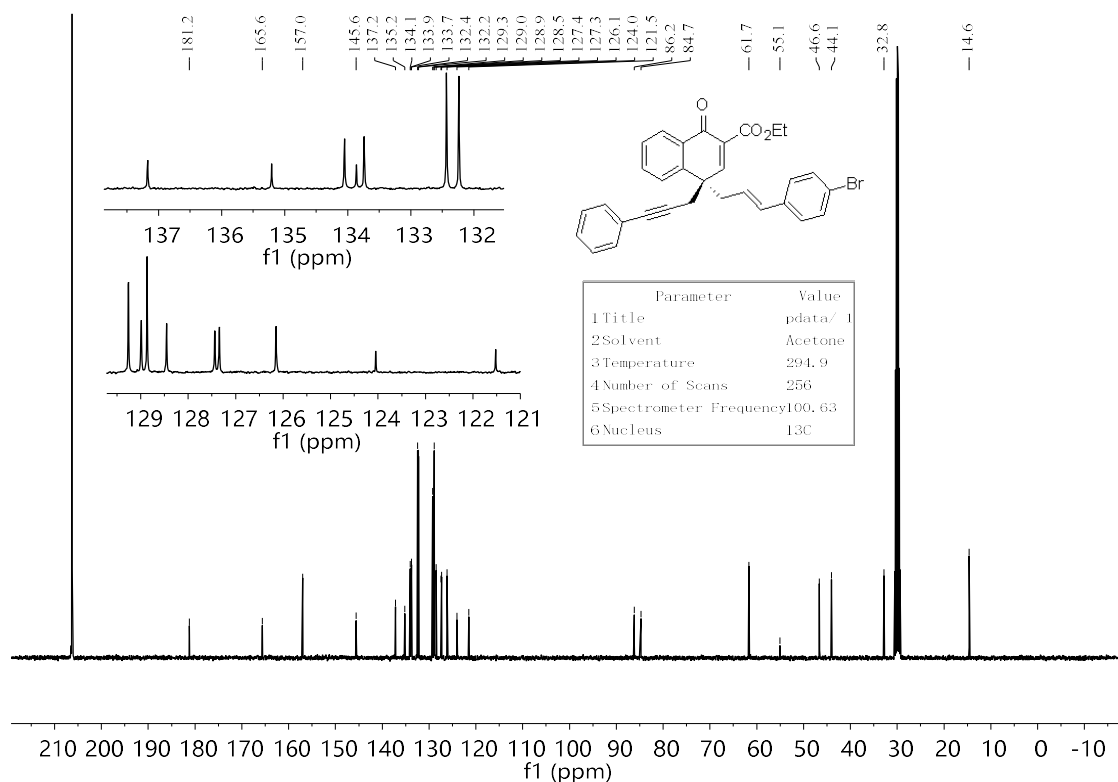

**Ethyl (R,E)-4-(3-(4-chlorophenyl)allyl)-1-oxo-4-(3-phenylprop-2-yn-1-yl)-1,4-dihydronaphthalene-2-carboxylate (B24)**

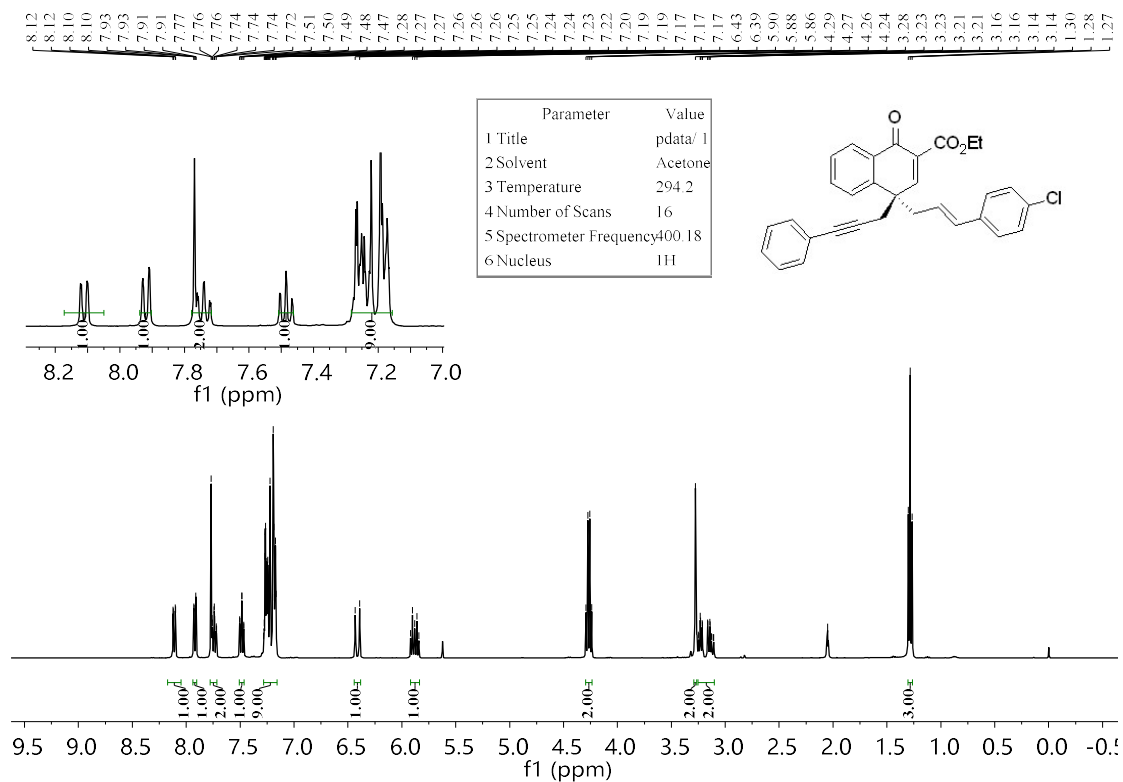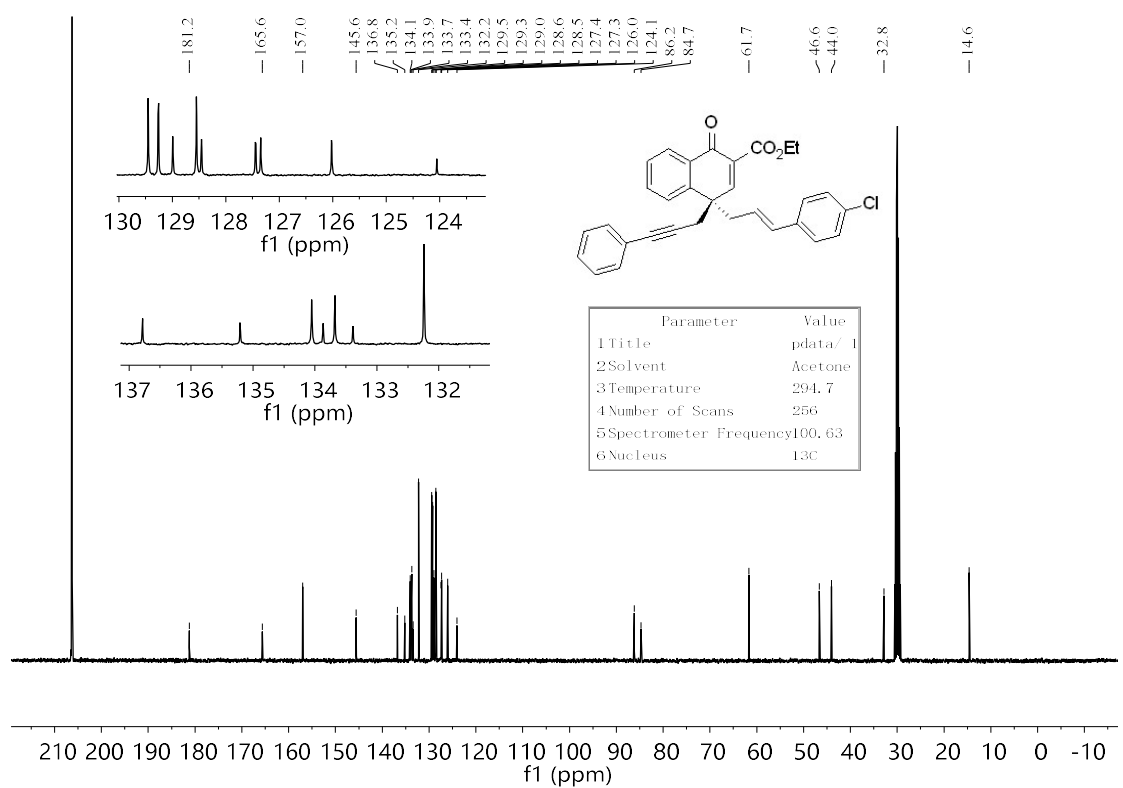

**Ethyl (R,E)-1-oxo-4-(3-phenylprop-2-yn-1-yl)-4-(3-(p-tolyl)allyl)-1,4-dihydronaphthalene-2-carboxylate (B25)**

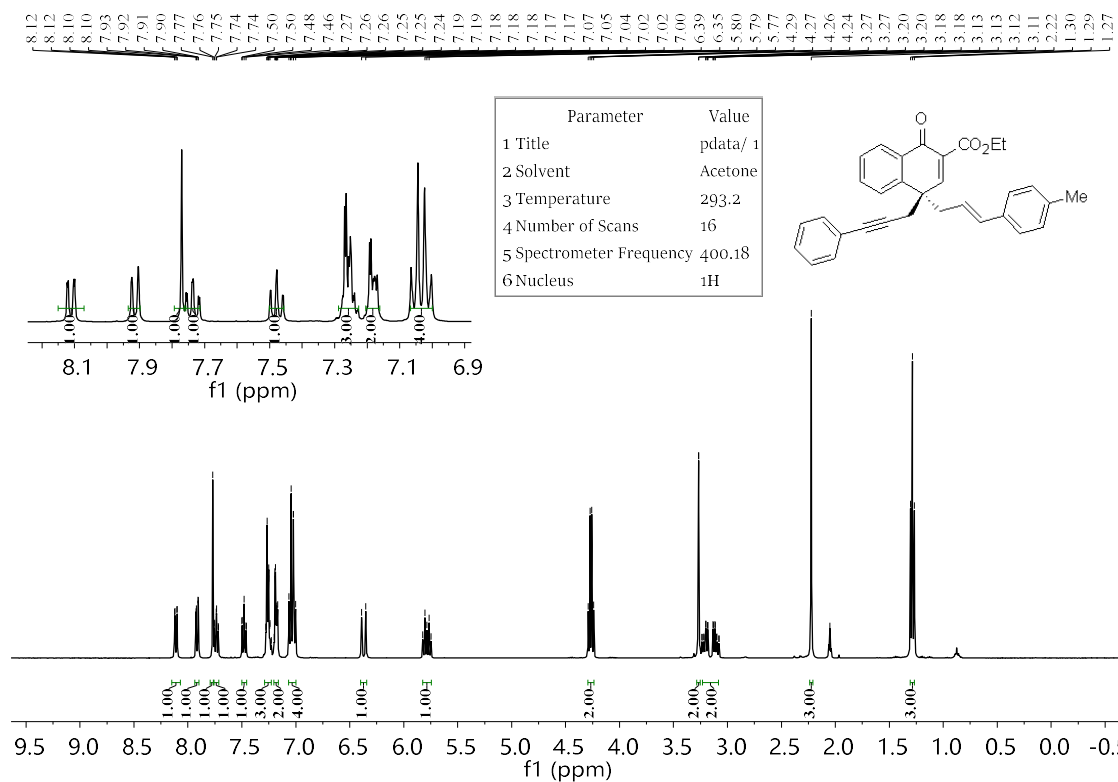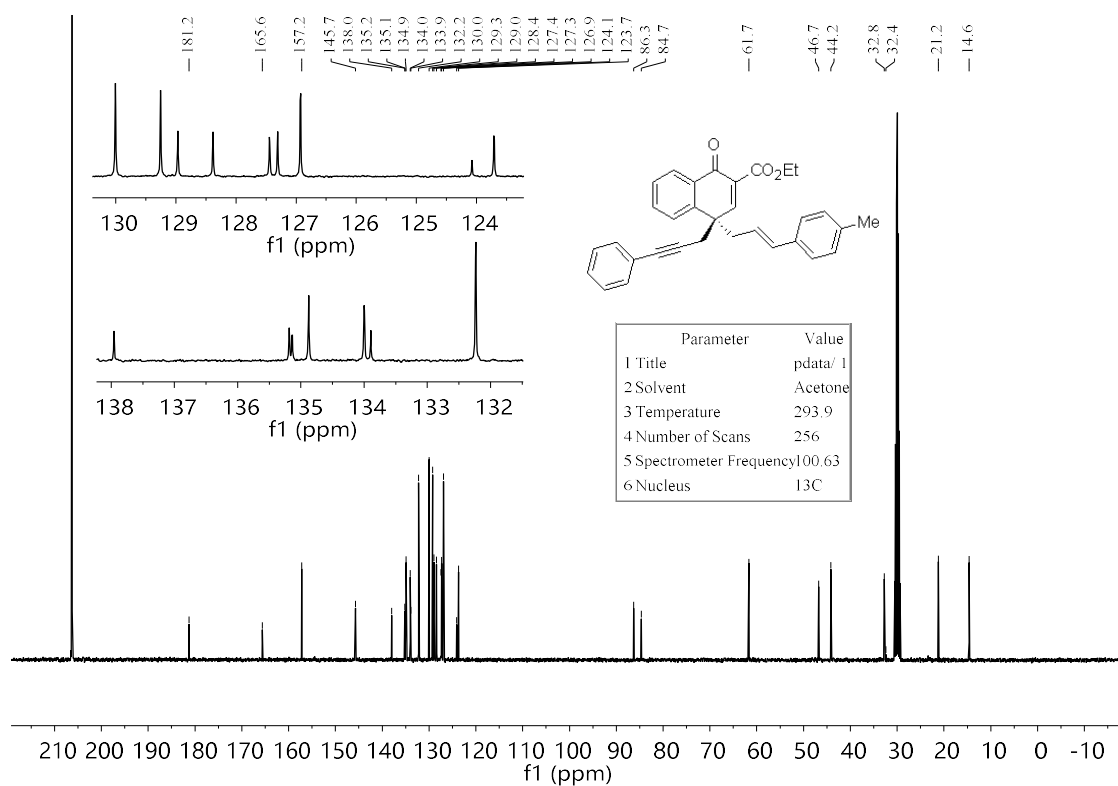

**Ethyl (R,E)-4-(3-(4-methoxyphenyl)allyl)-1-oxo-4-(3-phenylprop-2-yn-1-yl)-1,4-dihydronaphthalene-2-carboxylate (B26)**

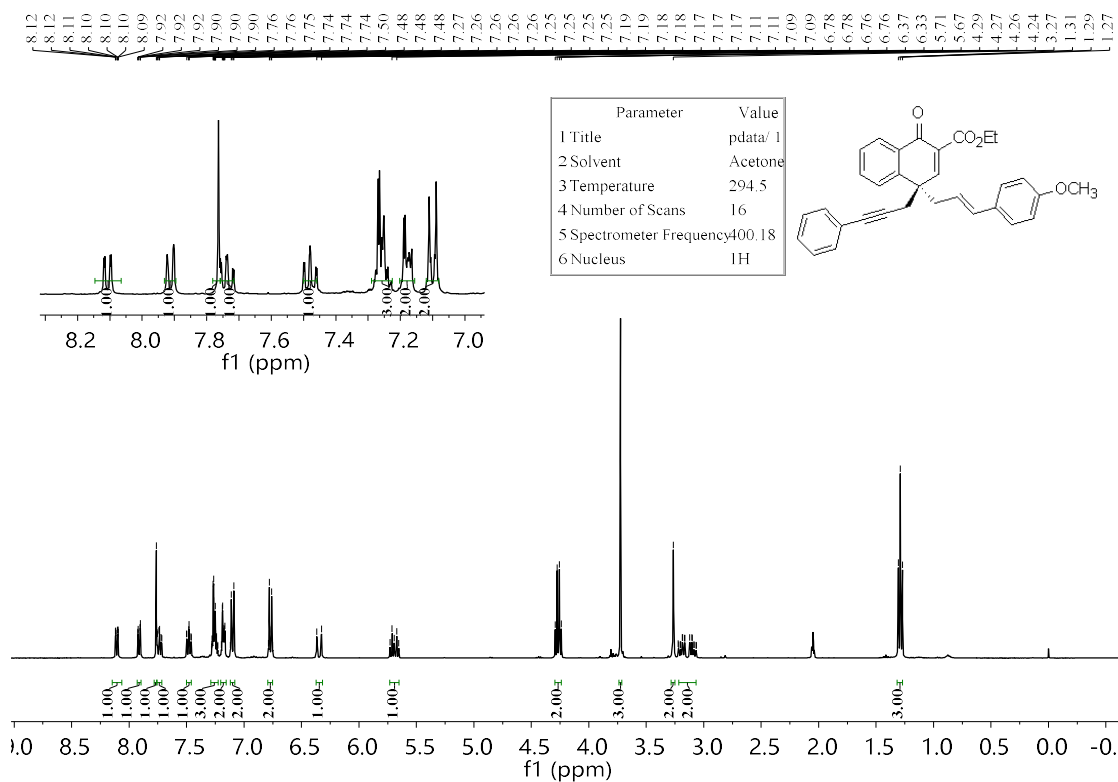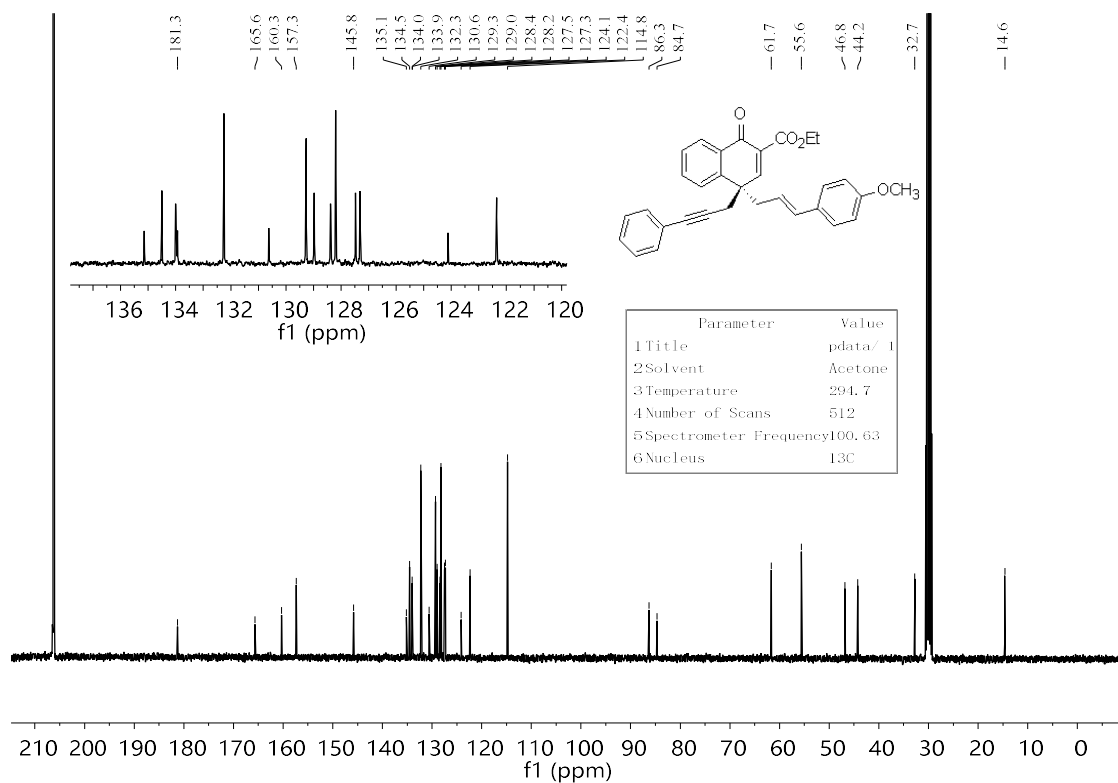

**Ethyl (R,E)-4-(3-(3-chlorophenyl)allyl)-1-oxo-4-(3-phenylprop-2-yn-1-yl)-1,4-dihydronaphthalene-2-carboxylate (B27)**

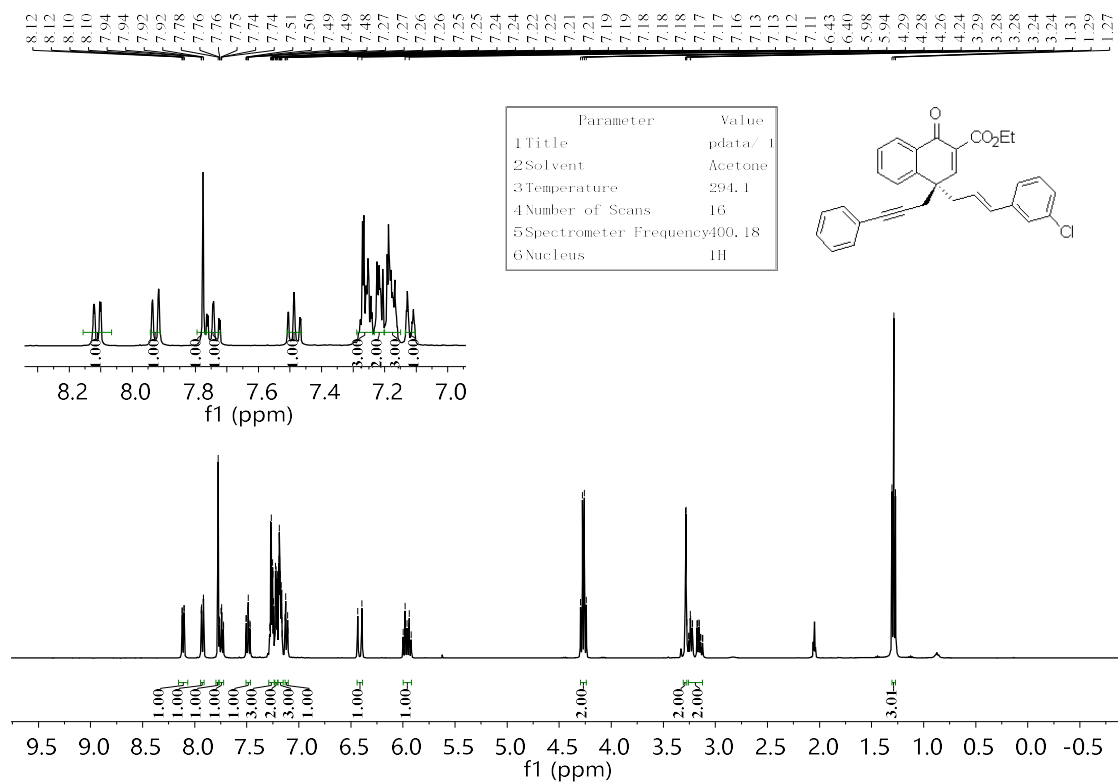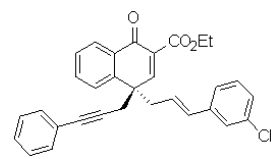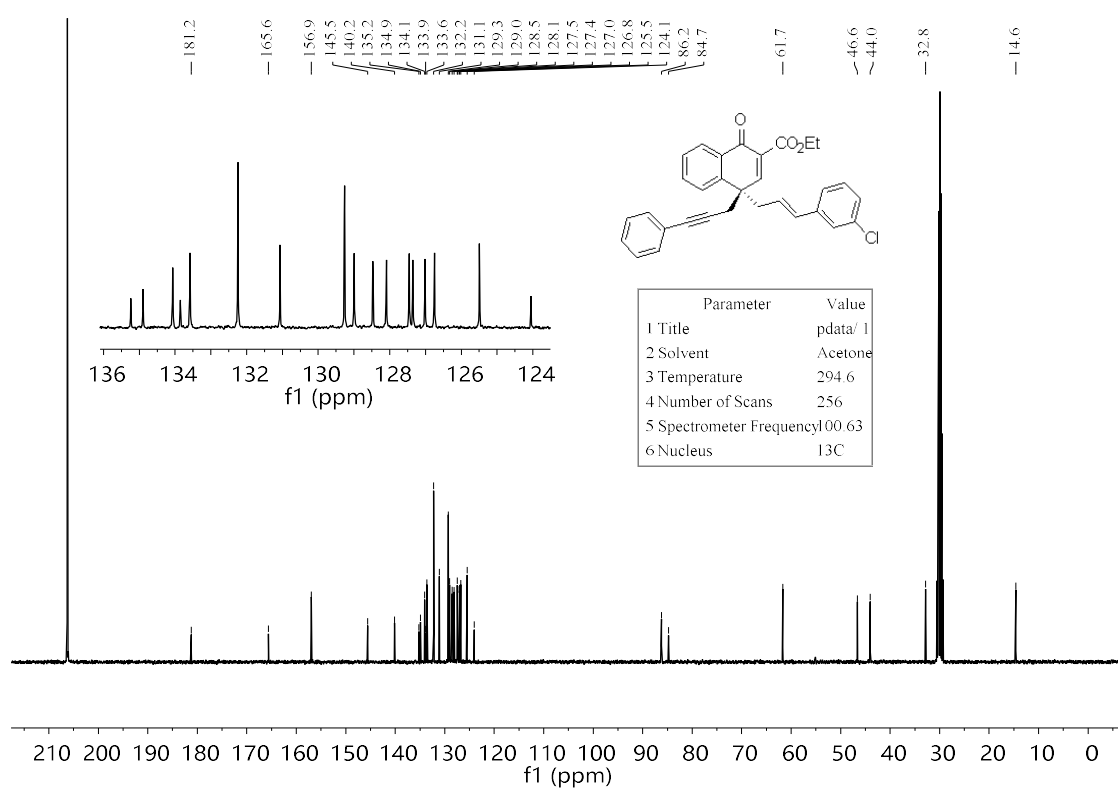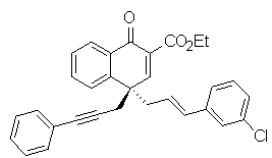



**Ethyl (R,E)-1-oxo-4-(3-phenylprop-2-yn-1-yl)-4-(3-(m-tolyl)allyl)-1,4-dihydronaphthalene-2-carboxylate (B28)**

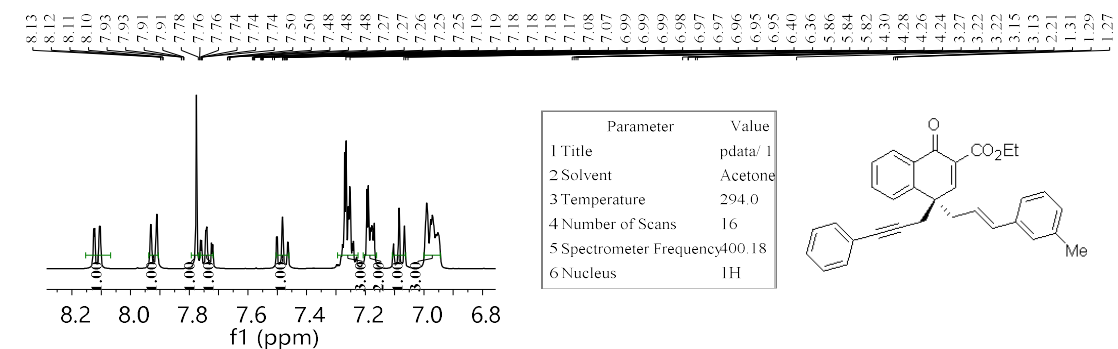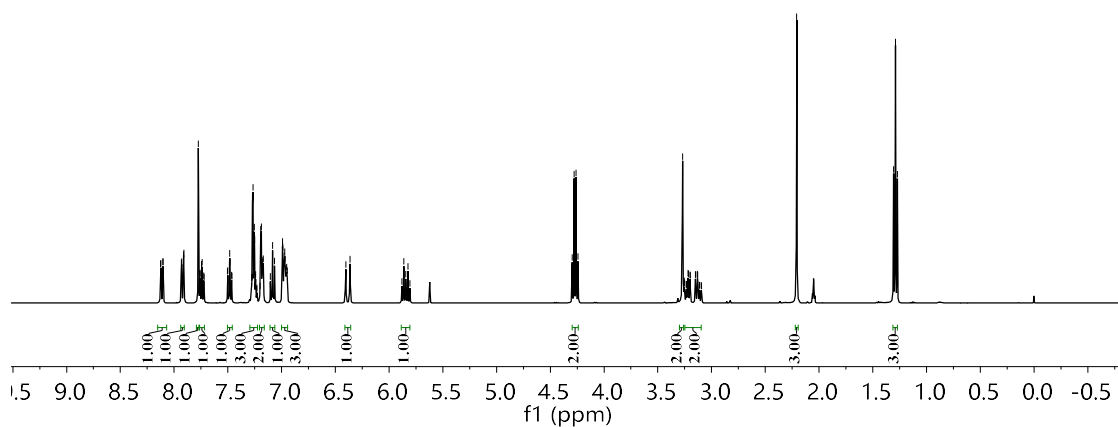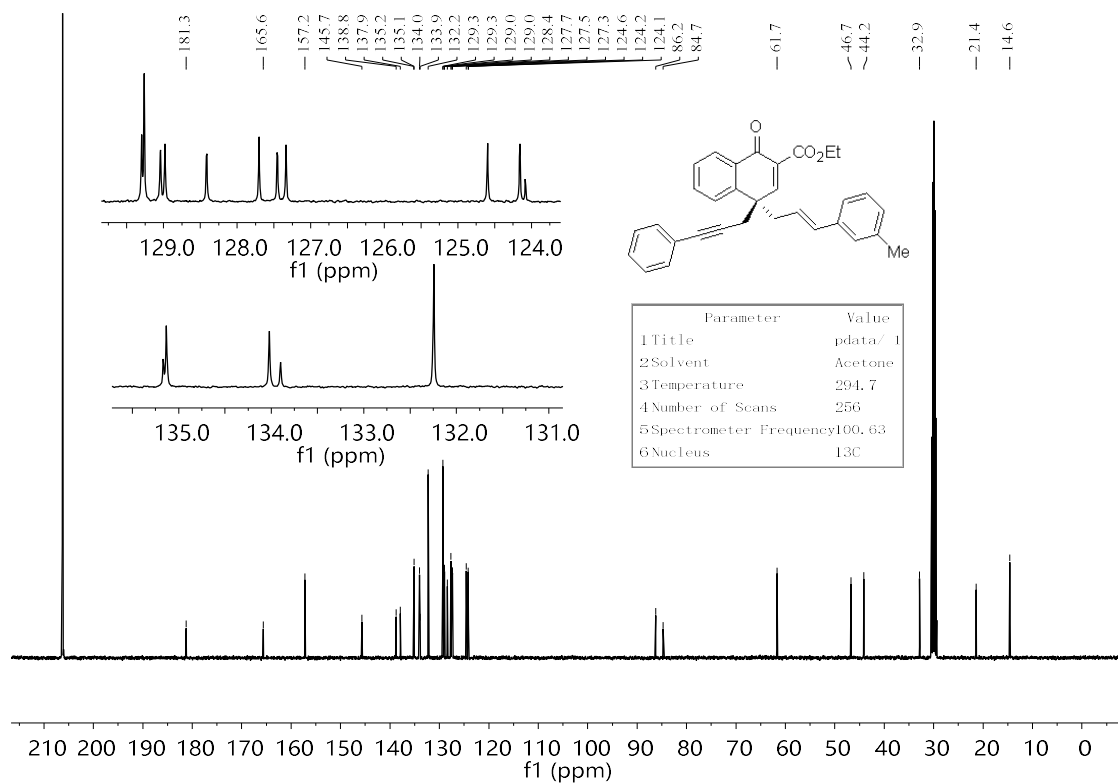

**Ethyl (R,E)-4-(3-(2-chlorophenyl)allyl)-1-oxo-4-(3-phenylprop-2-yn-1-yl)-1,4-dihydronaphthalene-2-carboxylate (B29)**

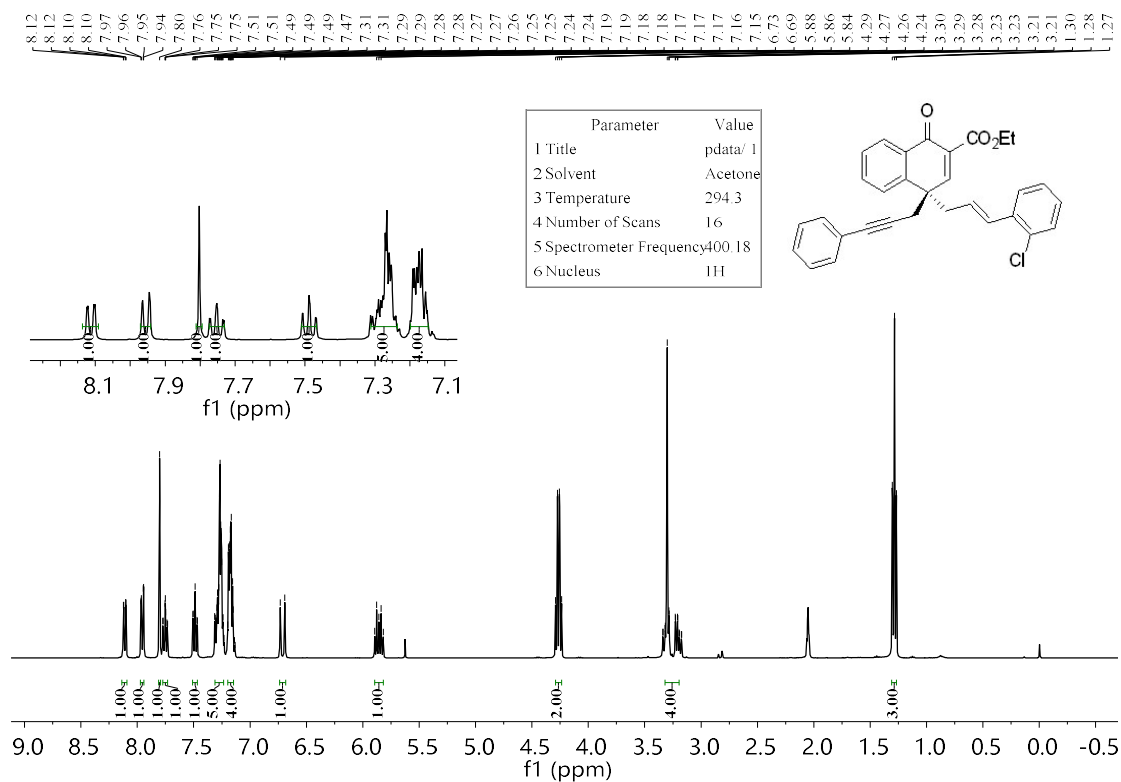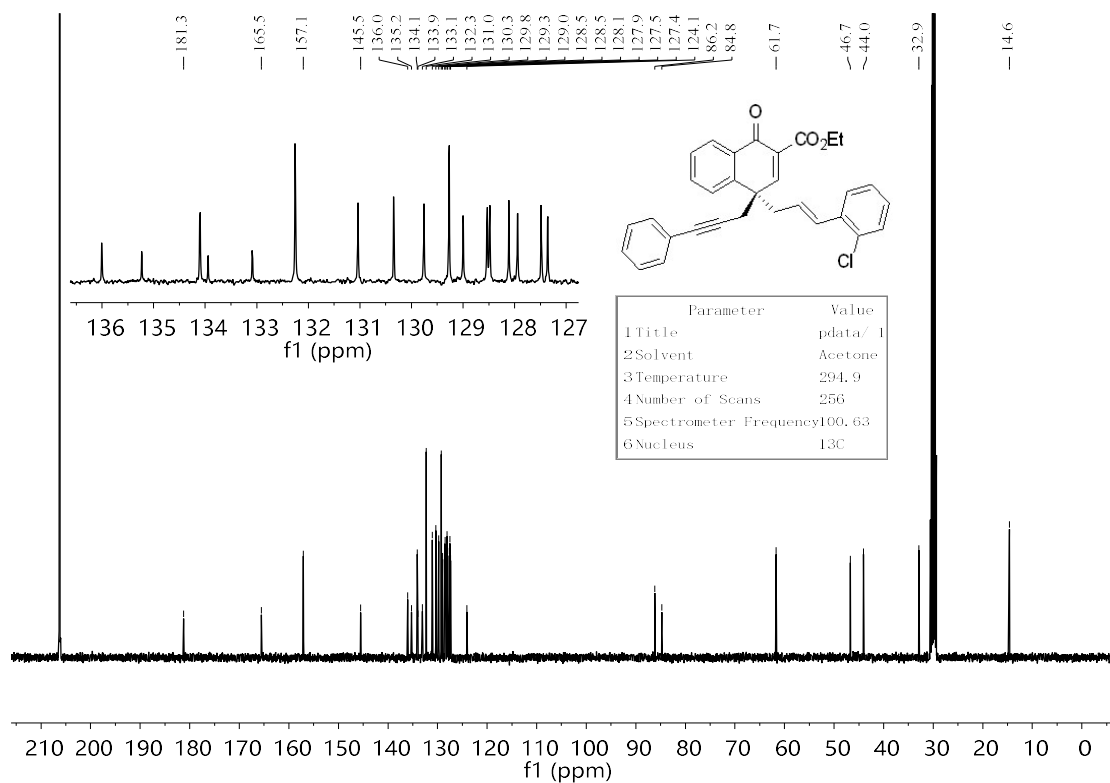

**Ethyl (R,E)-1-oxo-4-(3-phenylprop-2-yn-1-yl)-4-(3-(o-tolyl)allyl)-1,4-dihydronaphthalene-2-carboxylate (B30)**

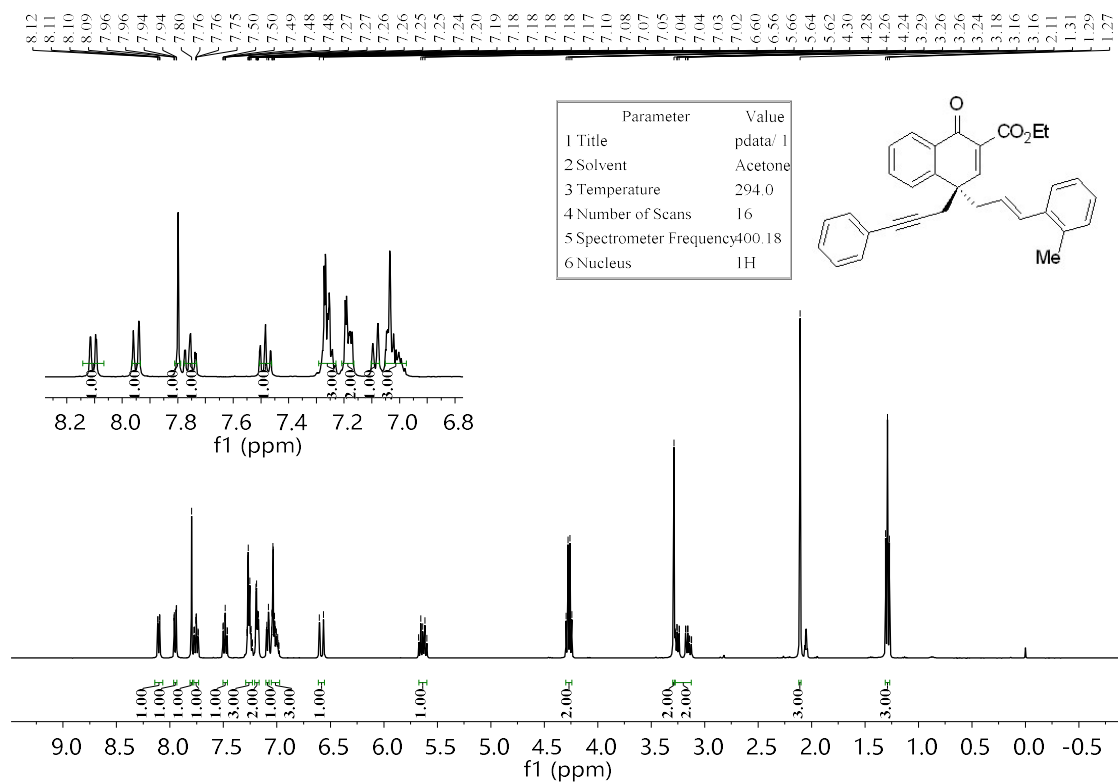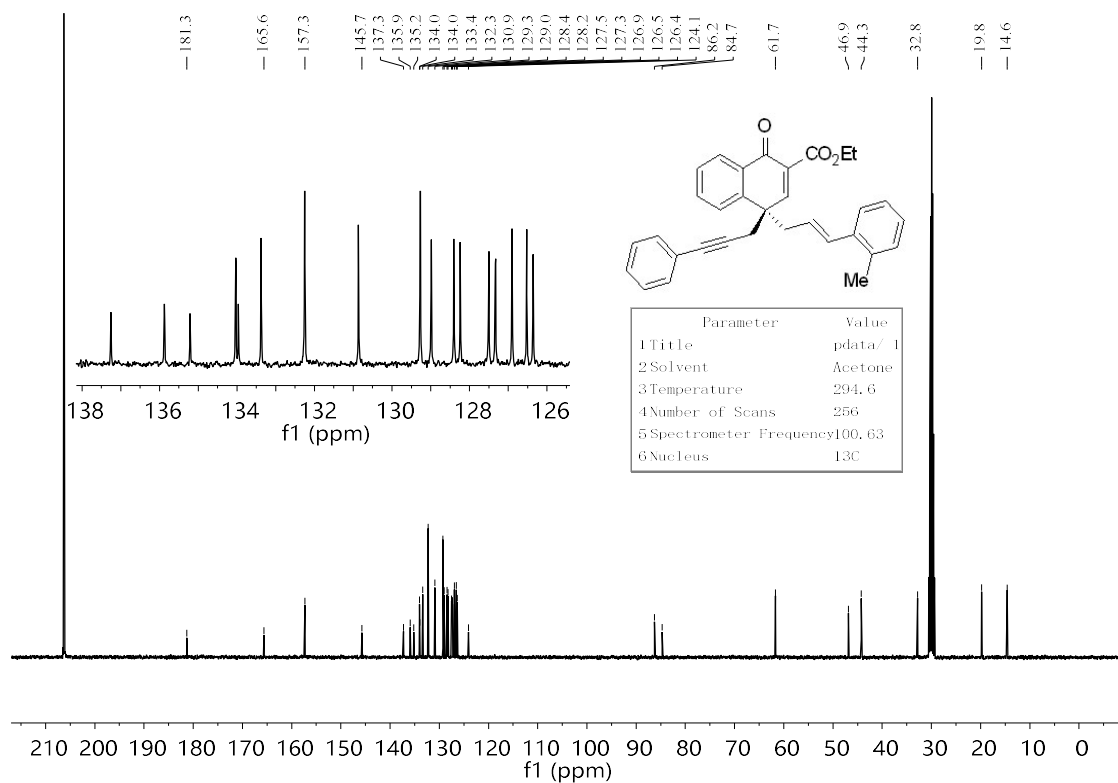

**Ethyl (R,E)-4-(3-(2-methoxyphenyl)allyl)-1-oxo-4-(3-phenylprop-2-yn-1-yl)-1,4-dihydronaphthalene-2-carboxylate (B31)**

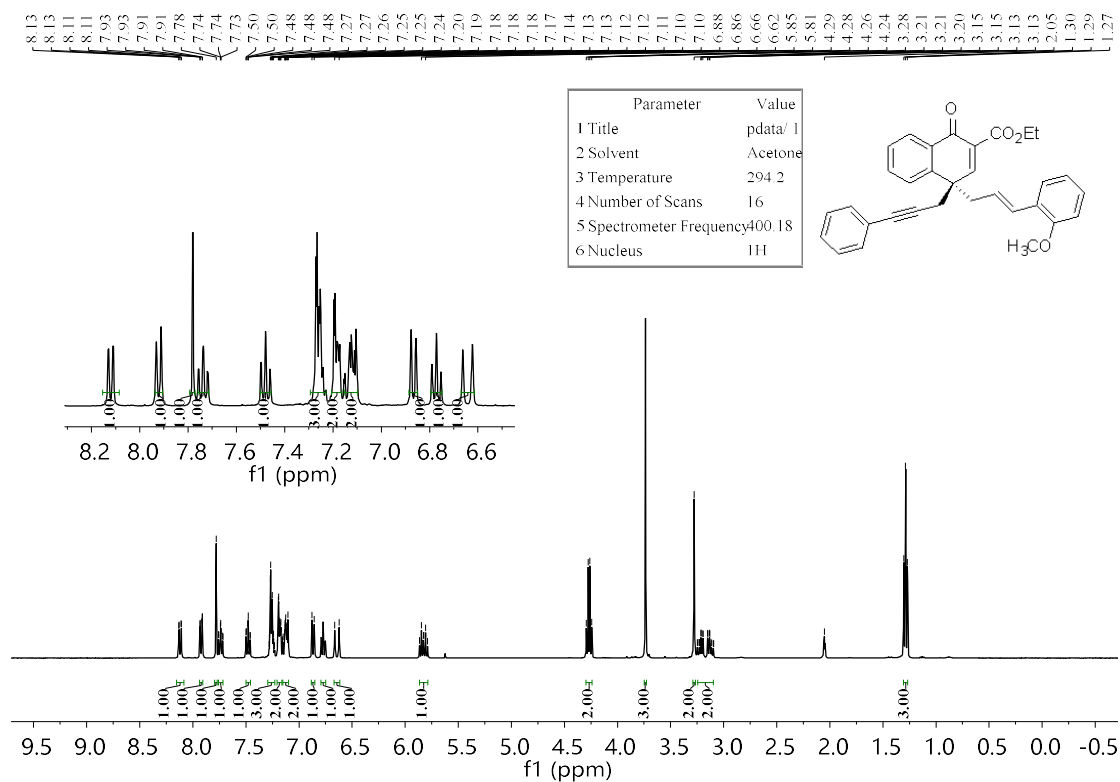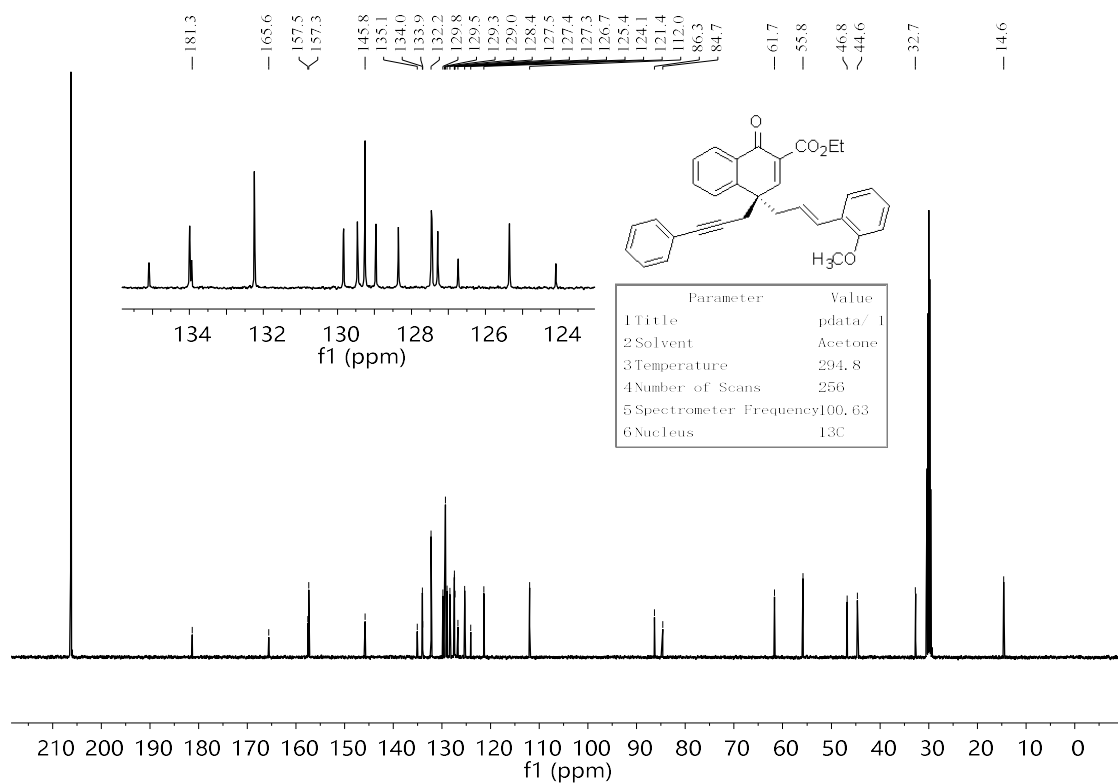

**Ethyl (R,E)-4-(3-(naphthalen-1-yl)allyl)-1-oxo-4-(3-phenylprop-2-yn-1-yl)-1,4-dihydronaphthalene-2-carboxylate (B32)**

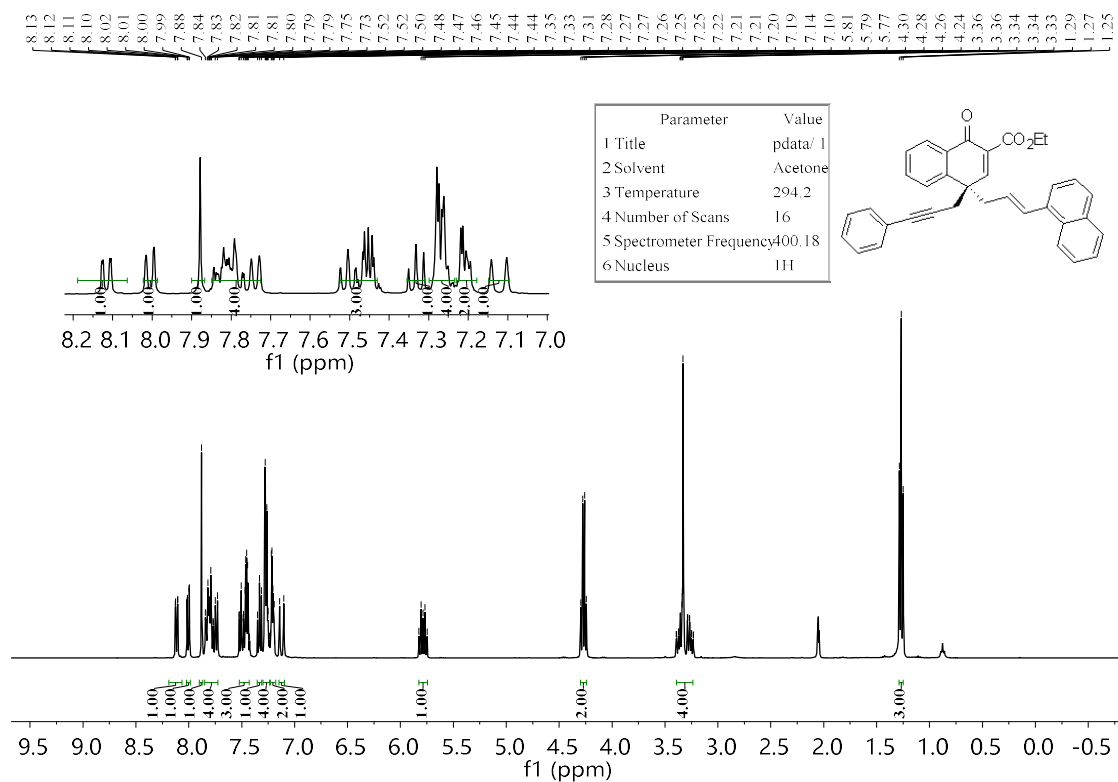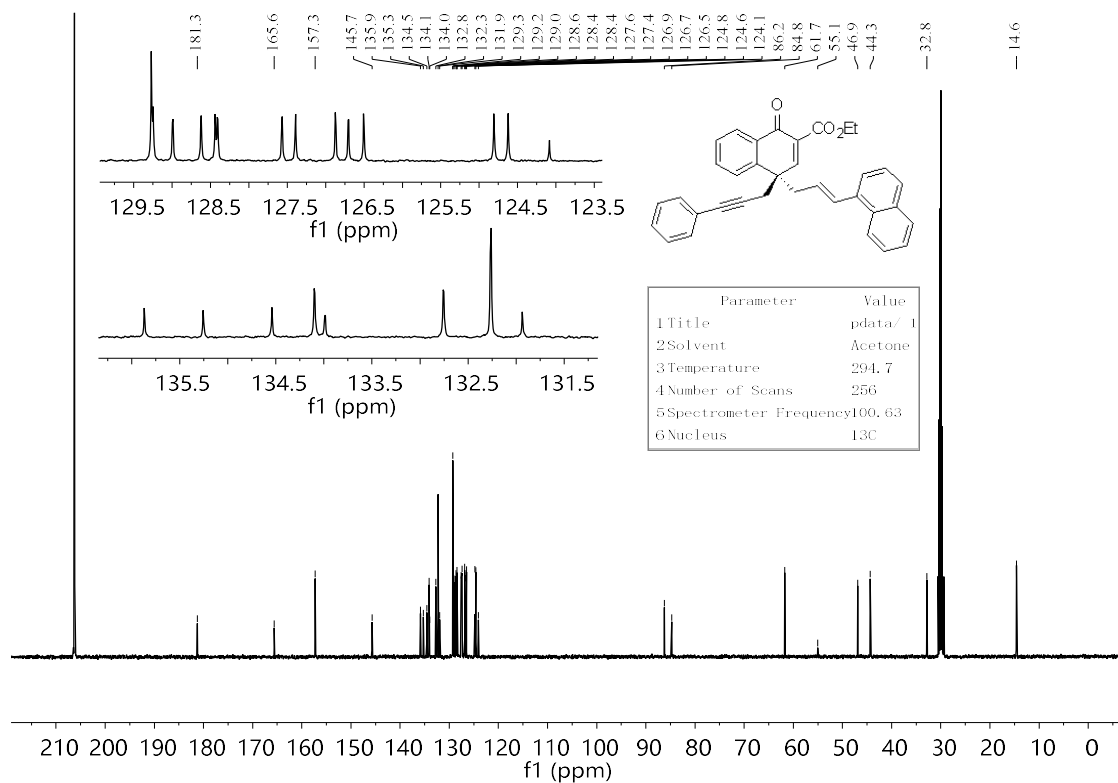

**Ehyl (R,E)-1-oxo-4-(3-phenylprop-2-yn-1-yl)-4-(3-(thiophen-2-yl)allyl)-1,4-dihydronaphthalene-2-carboxylate (B33)**

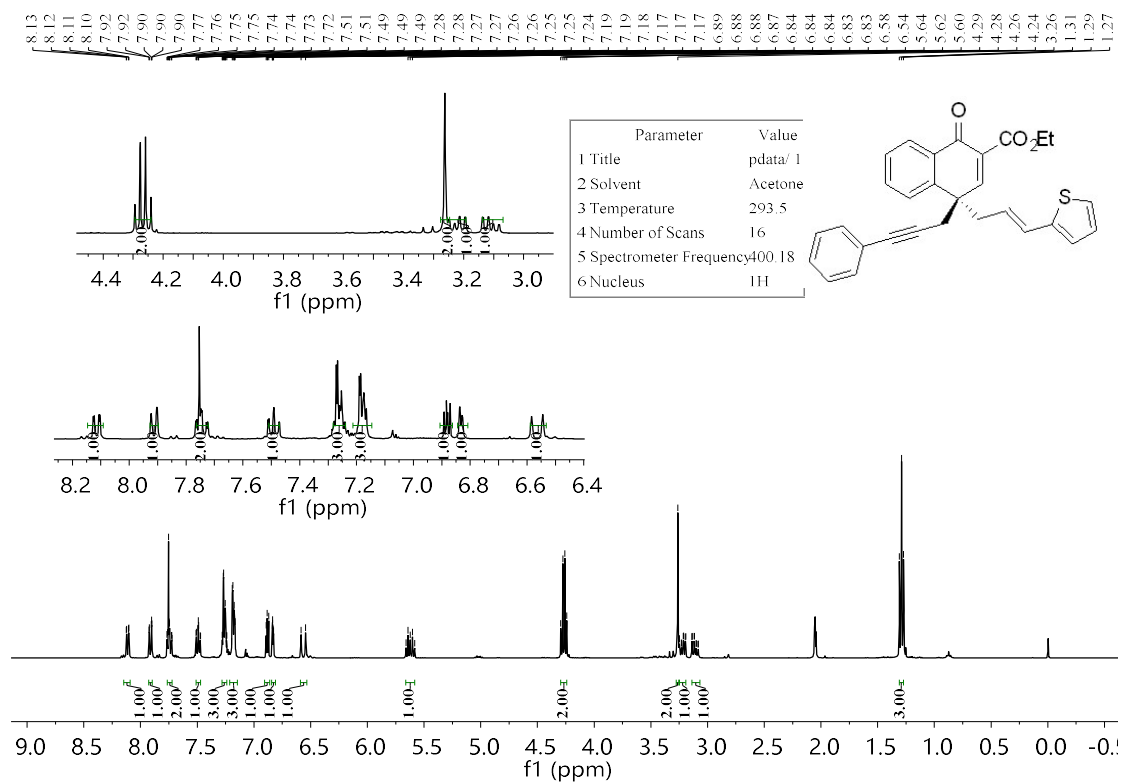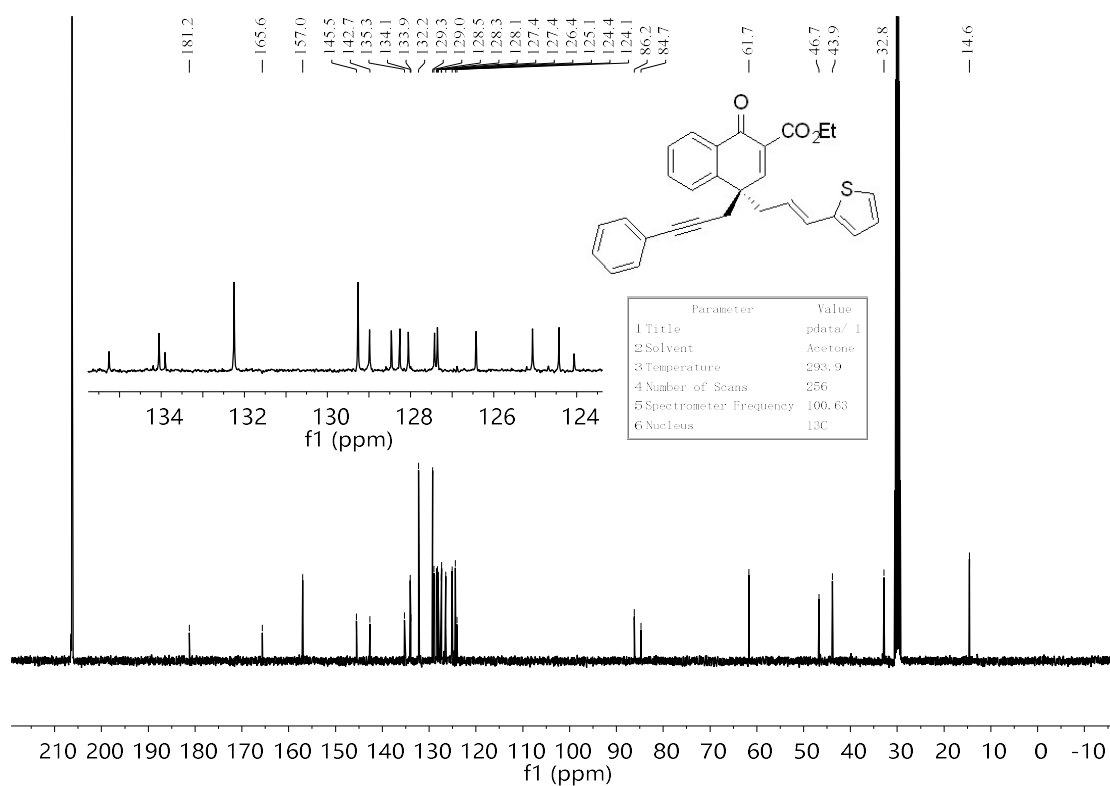

**Ehyl (R,E)-4-(4-ethoxy-4-oxobut-2-en-1-yl)-1-oxo-4-(3-phenylprop-2-yn-1-yl)-1,4-dihydronaphthalene-2-carboxylate (B34)**

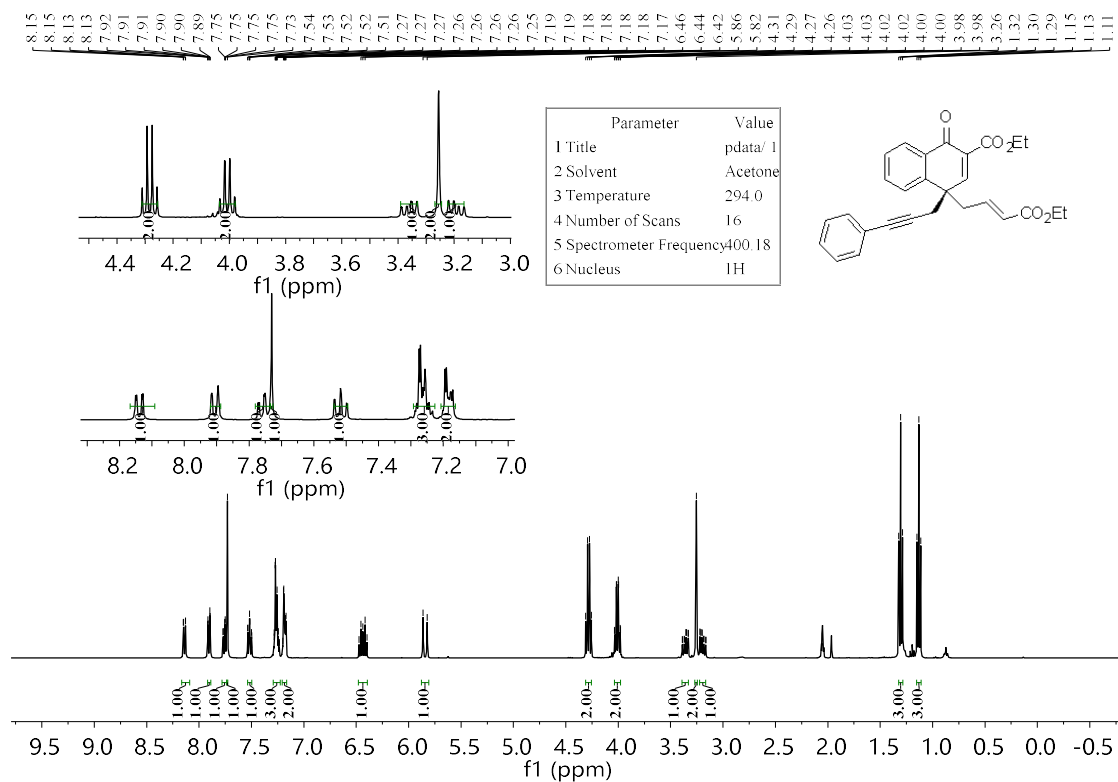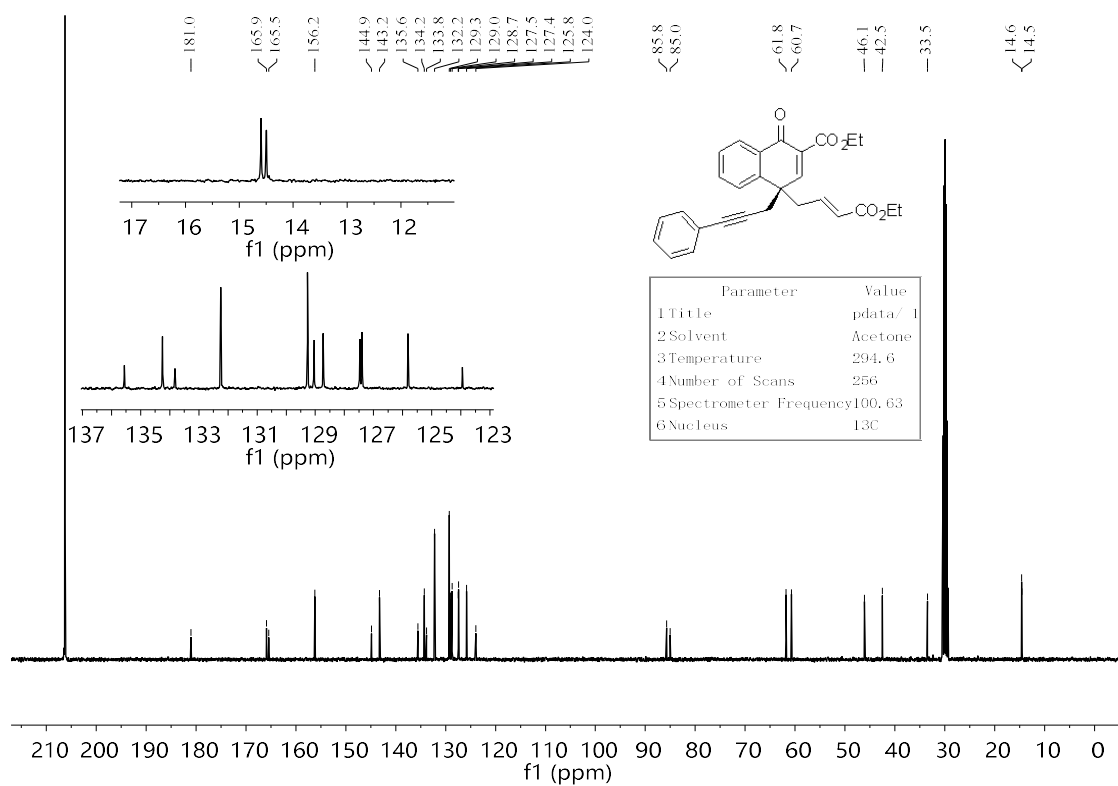

**Ehyl (R,E)-4-(but-2-en-1-yl)-1-oxo-4-(3-phenylprop-2-yn-1-yl)-1,4-dihydronaphthalene-2-carboxylate (B35)**

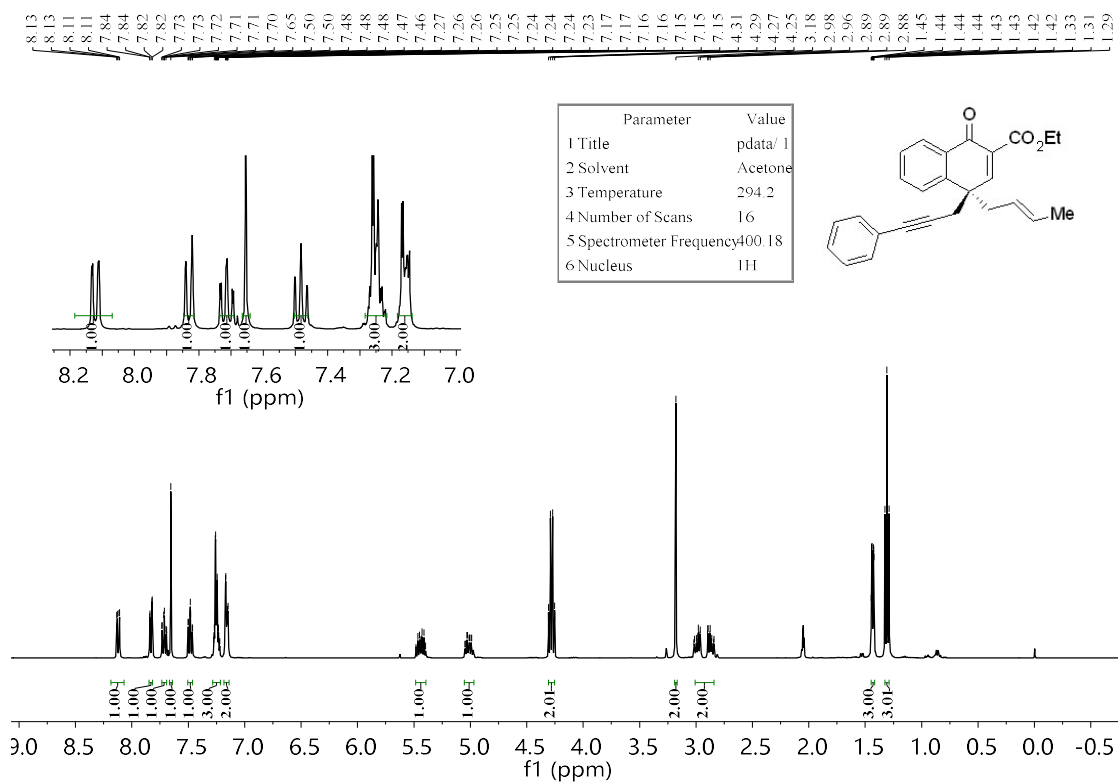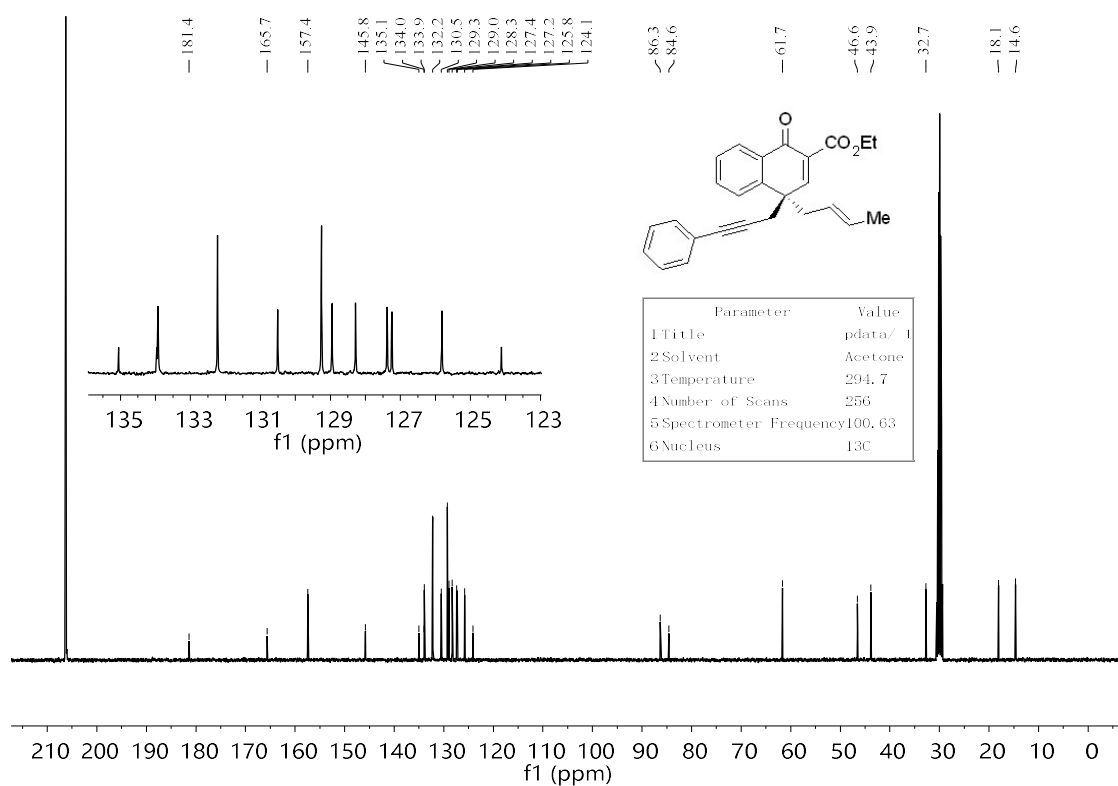



**Ehyl (R,E)-4-(hex-2-en-1-yl)-1-oxo-4-(3-phenylprop-2-yn-1-yl)-1,4-dihydronaphthalene-2-carboxylate (B36)**

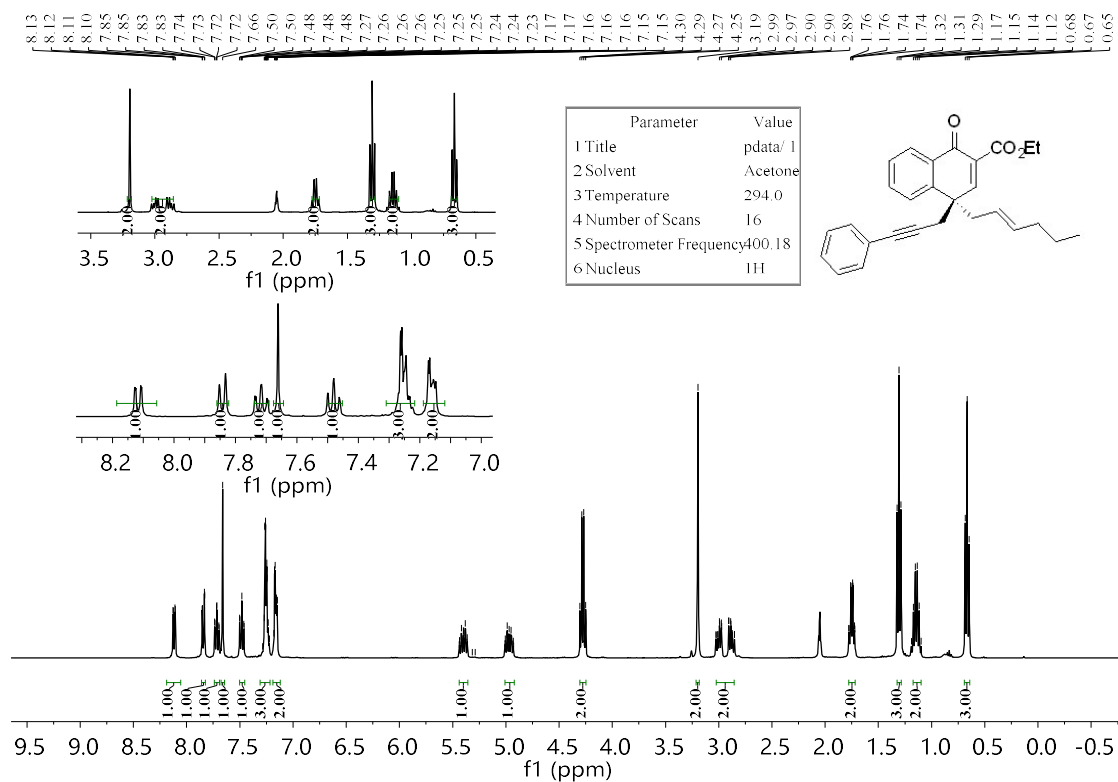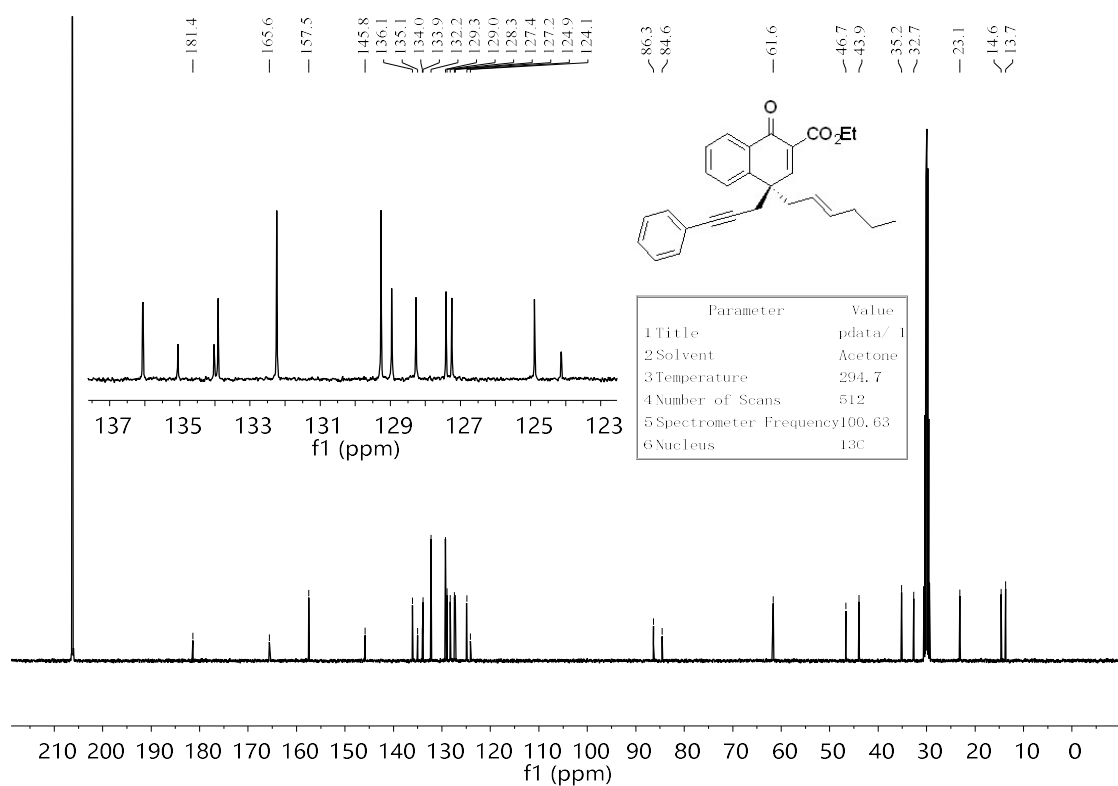

**Ehyl (R,E)-4-(3-cyclohexylallyl)-1-oxo-4-(3-phenylprop-2-yn-1-yl)-1,4-dihydronaphthalene-2-carboxylate (B37)**

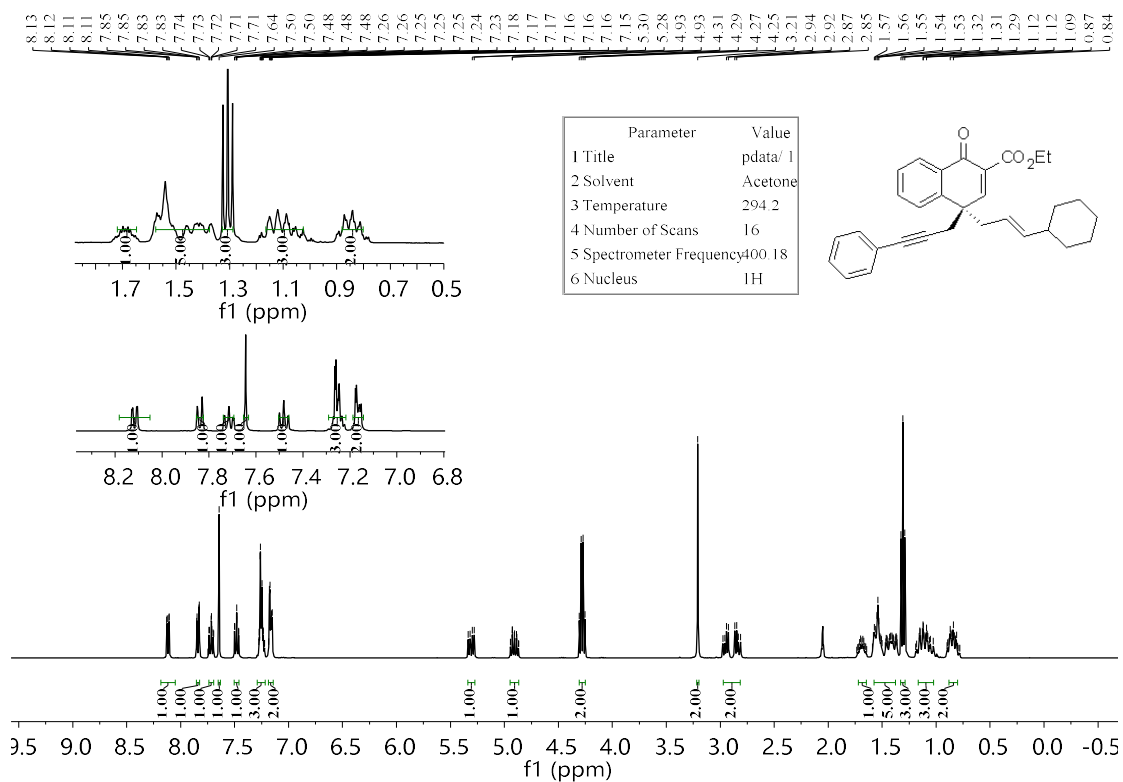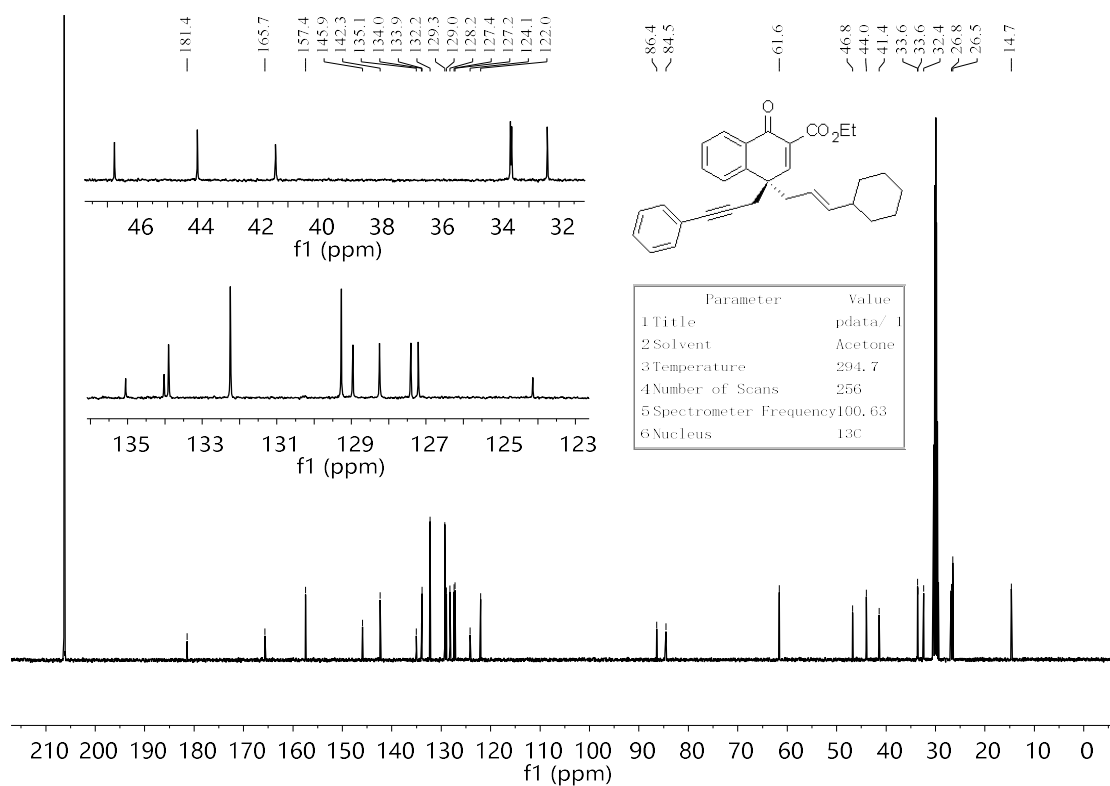

**Ethyl (R)-4-((E)-3-(4-bromophenyl)allyl)-4-cinnamyl-1-oxo-1,4-dihydronaphthalene-2-carboxylate (B38)**

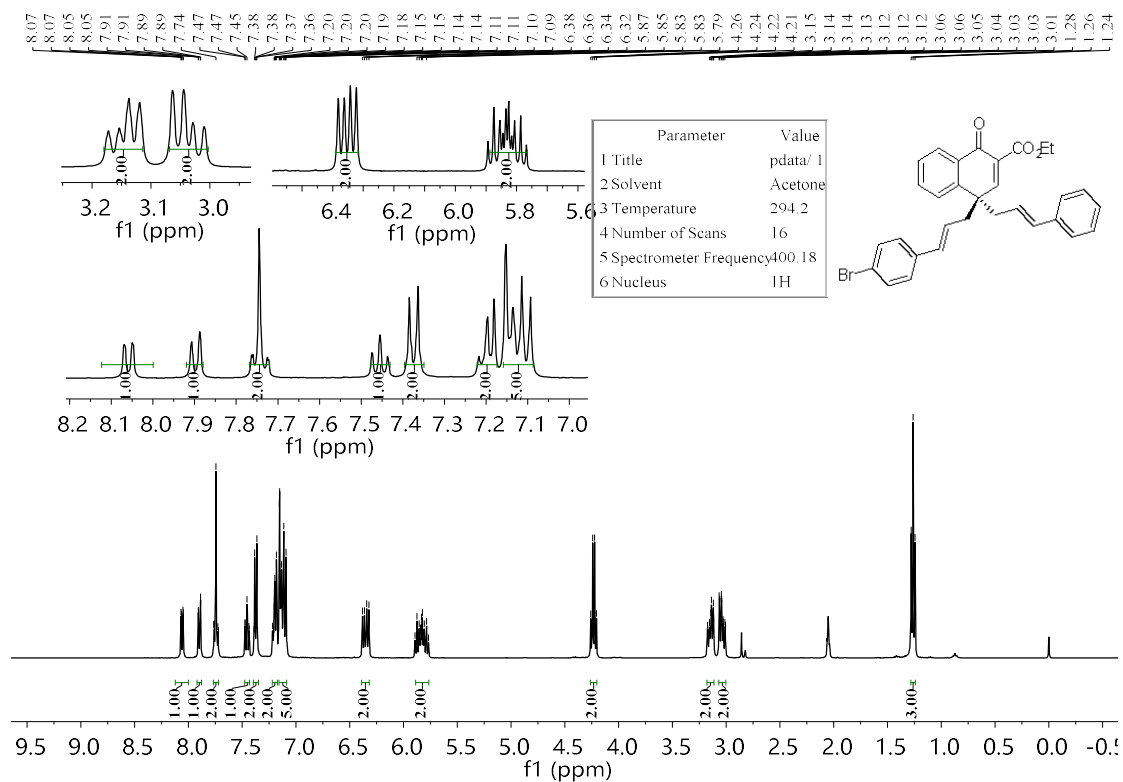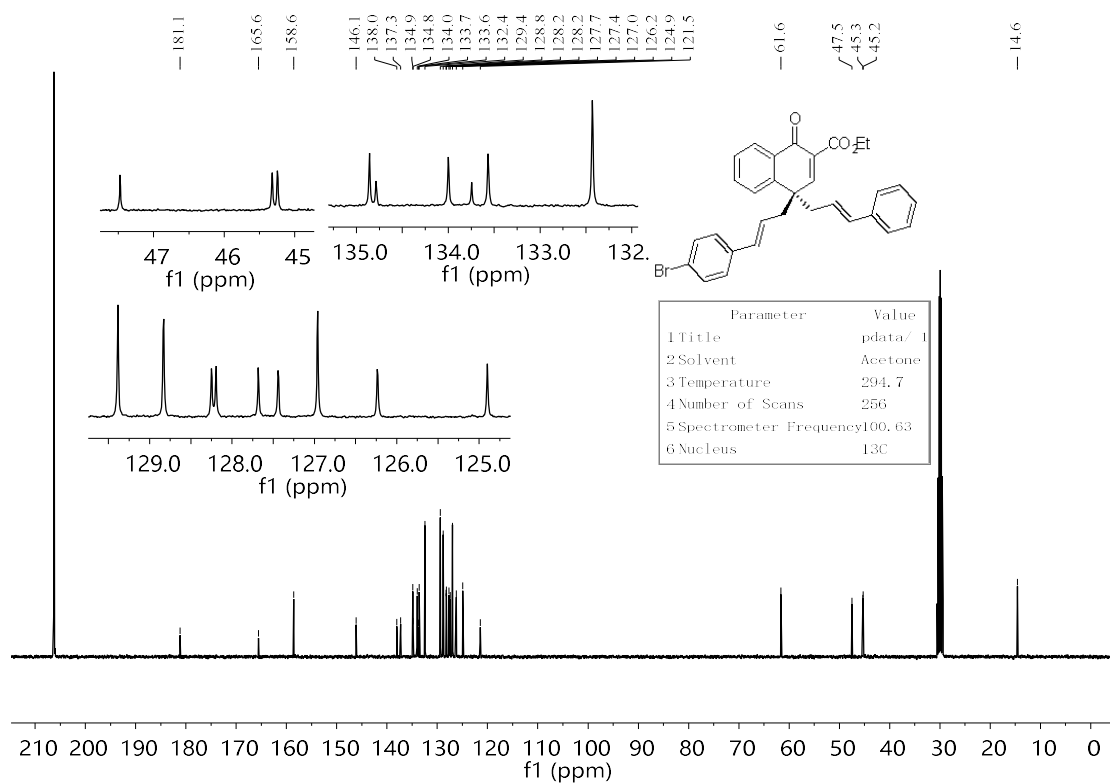

**Ethyl (S)-4-((E)-3-(4-bromophenyl)allyl)-4-cinnamyl-1-oxo-1,4-dihydronaphthalene-2-carboxylate (*ent*-B38)**

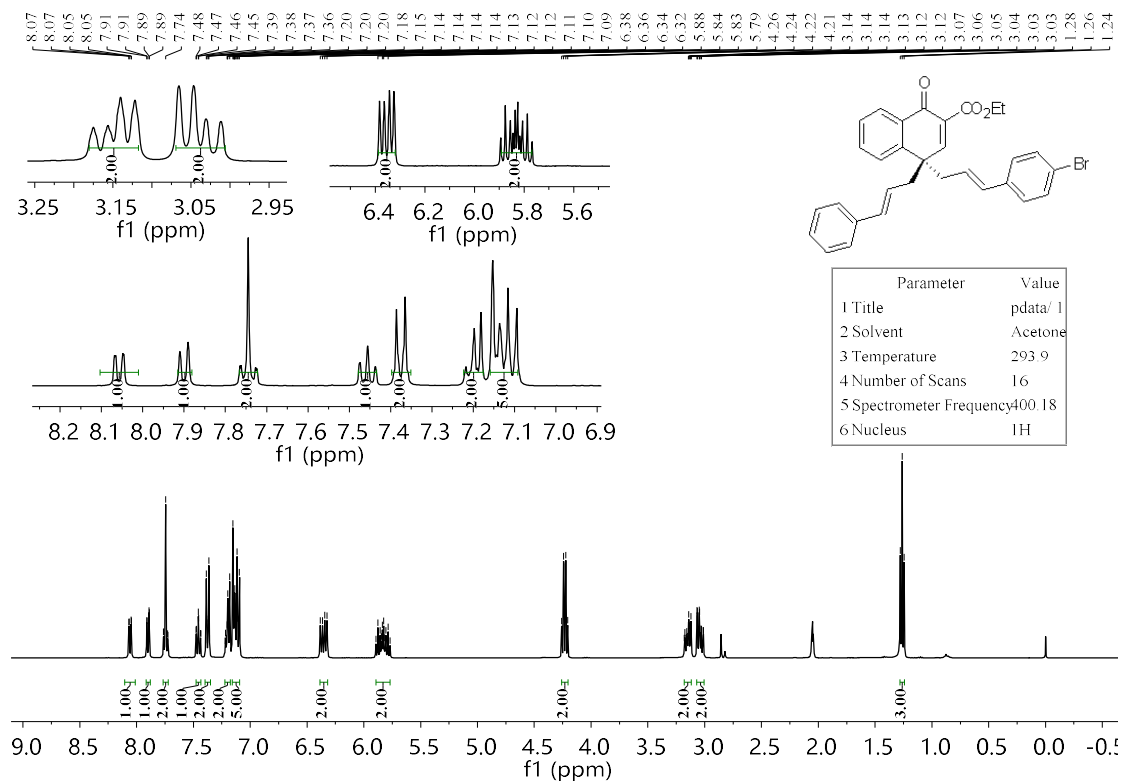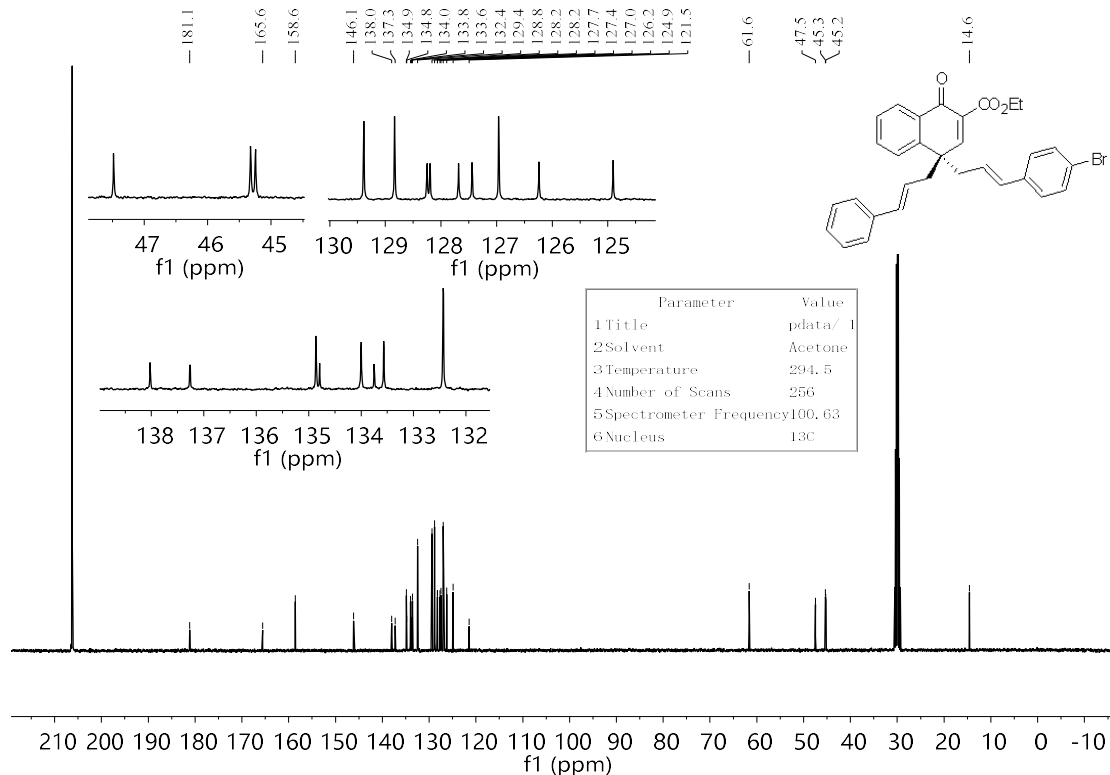

**Ethyl (R)-4-cinnamyl-4-((E)-3-(naphthalen-1-yl)allyl)-1-oxo-1,4-dihydronaphthalene-2-carboxylate (B39)**

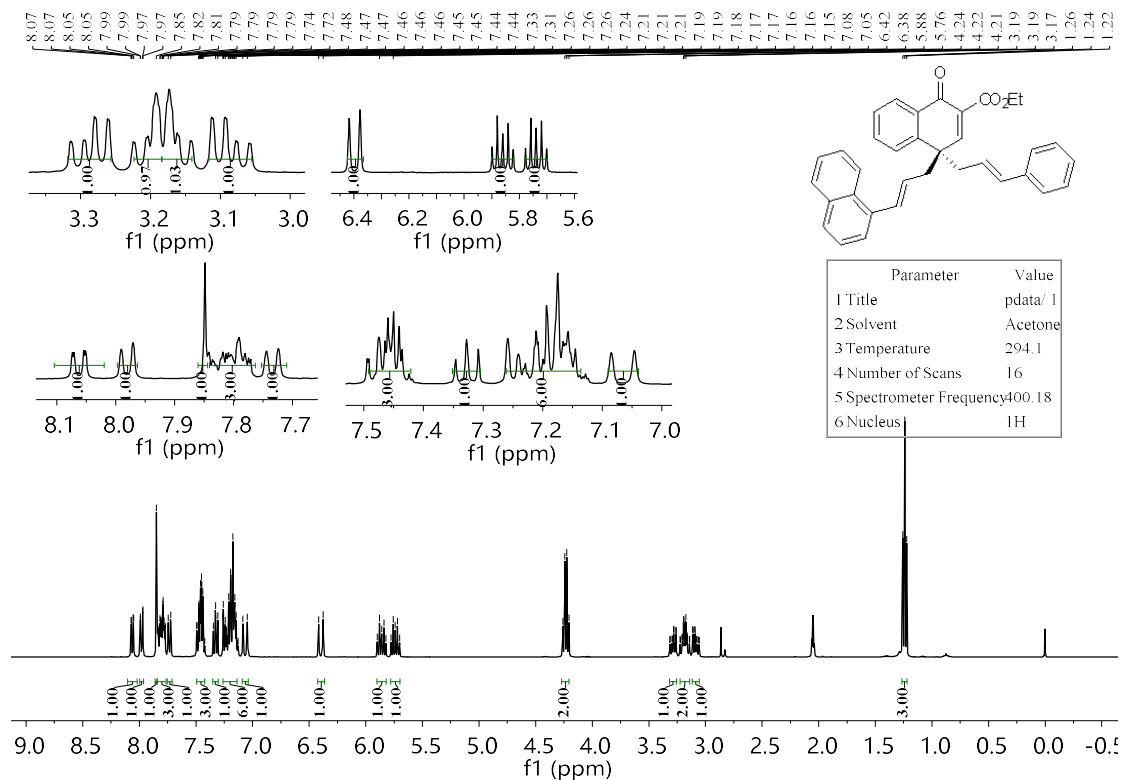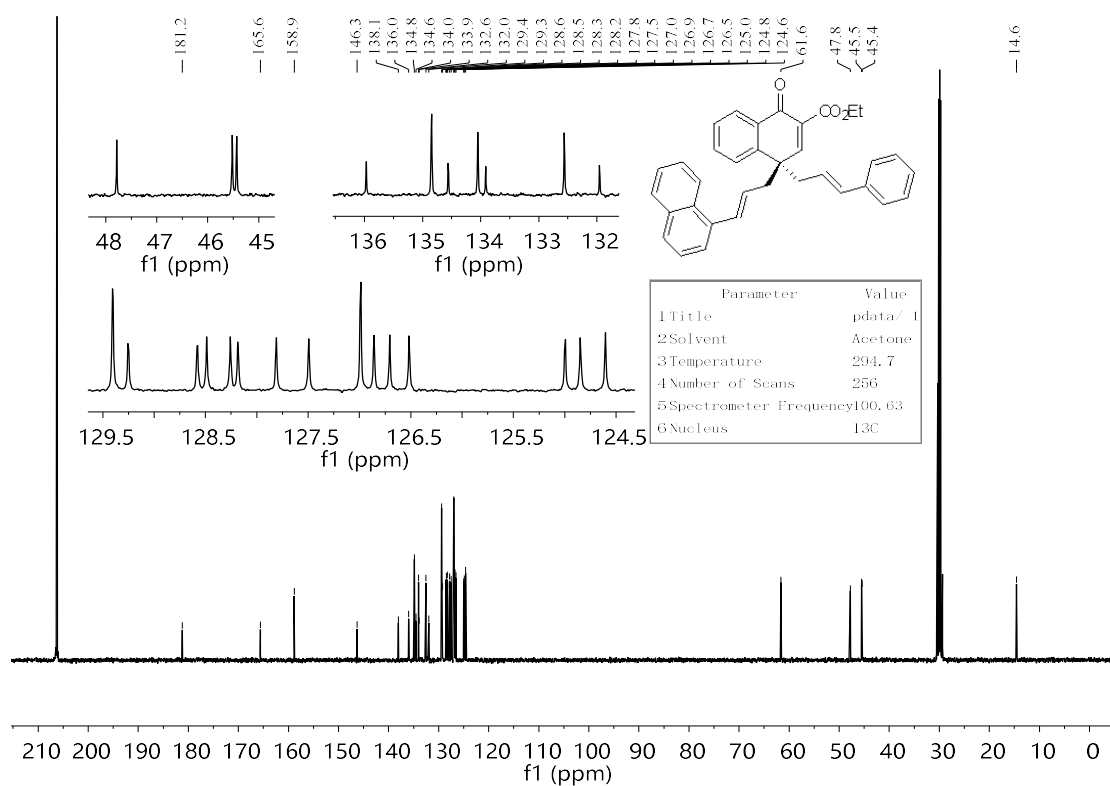

**Ethyl (S)-4-cinnamyl-4-((E)-3-(naphthalen-1-yl)allyl)-1-oxo-1,4-dihydronaphthalene-2-carboxylate (*ent*-B39)**

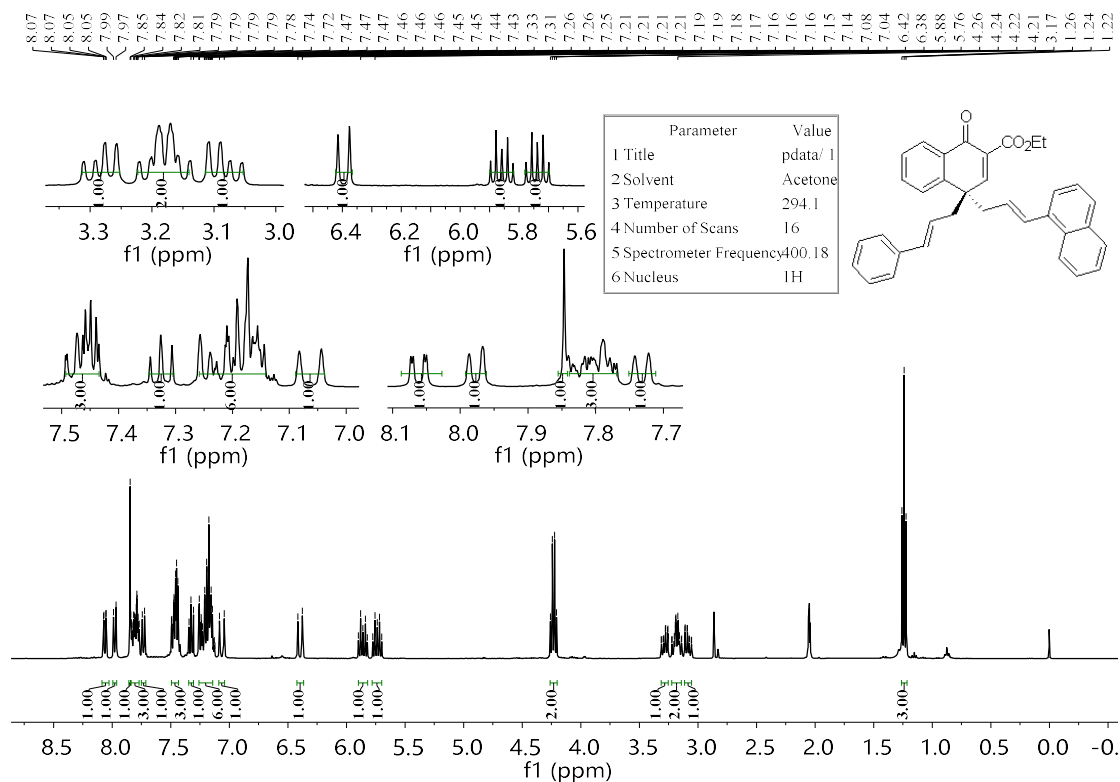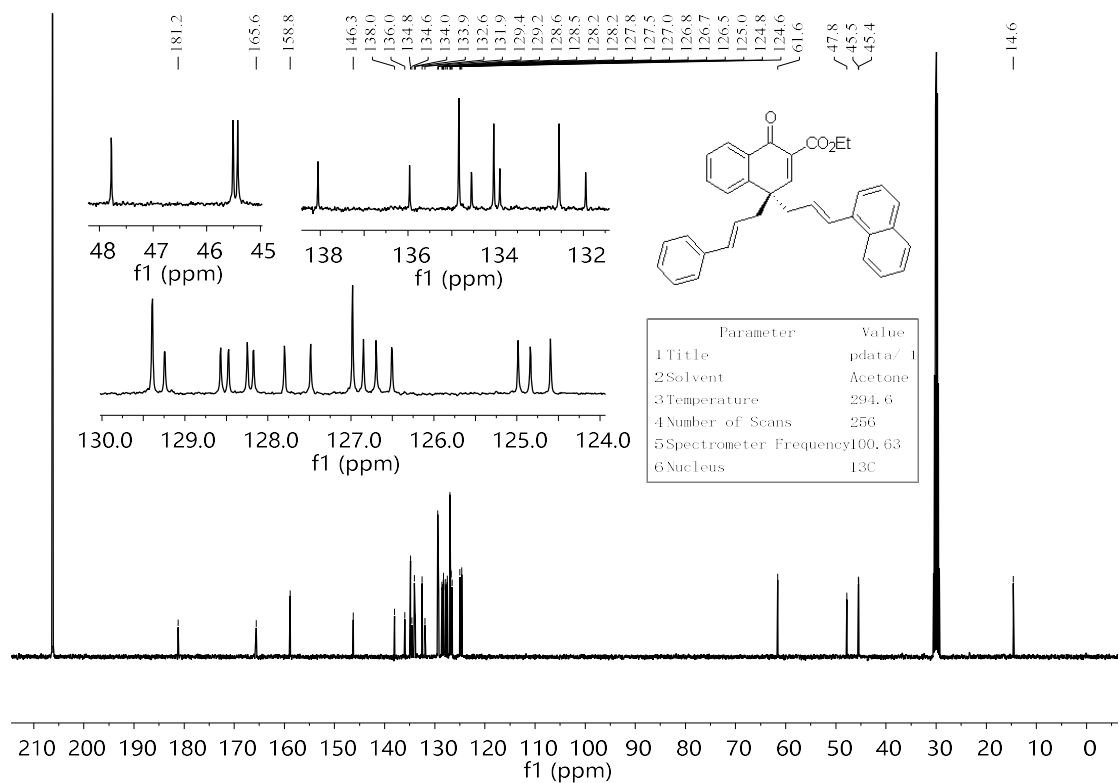

**Ethyl (S)-4-((E)-but-2-en-1-yl)-4-cinnamyl-1-oxo-1,4-dihydronaphthalene-2-carboxylate (B40)**

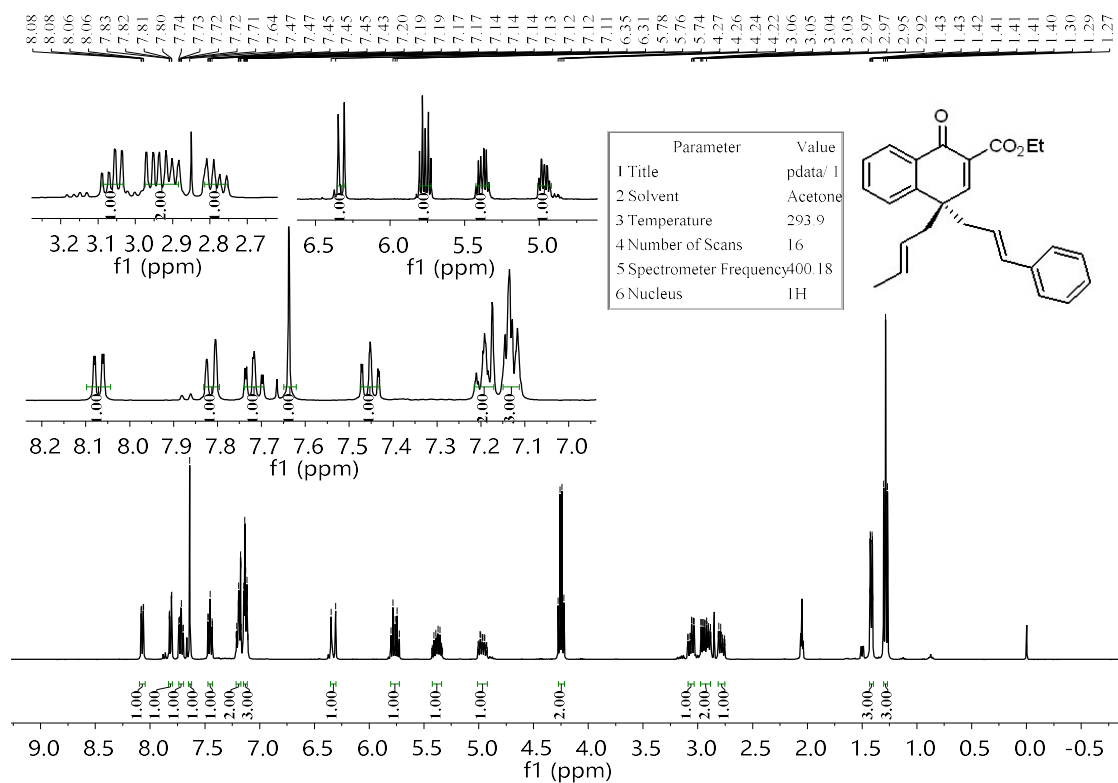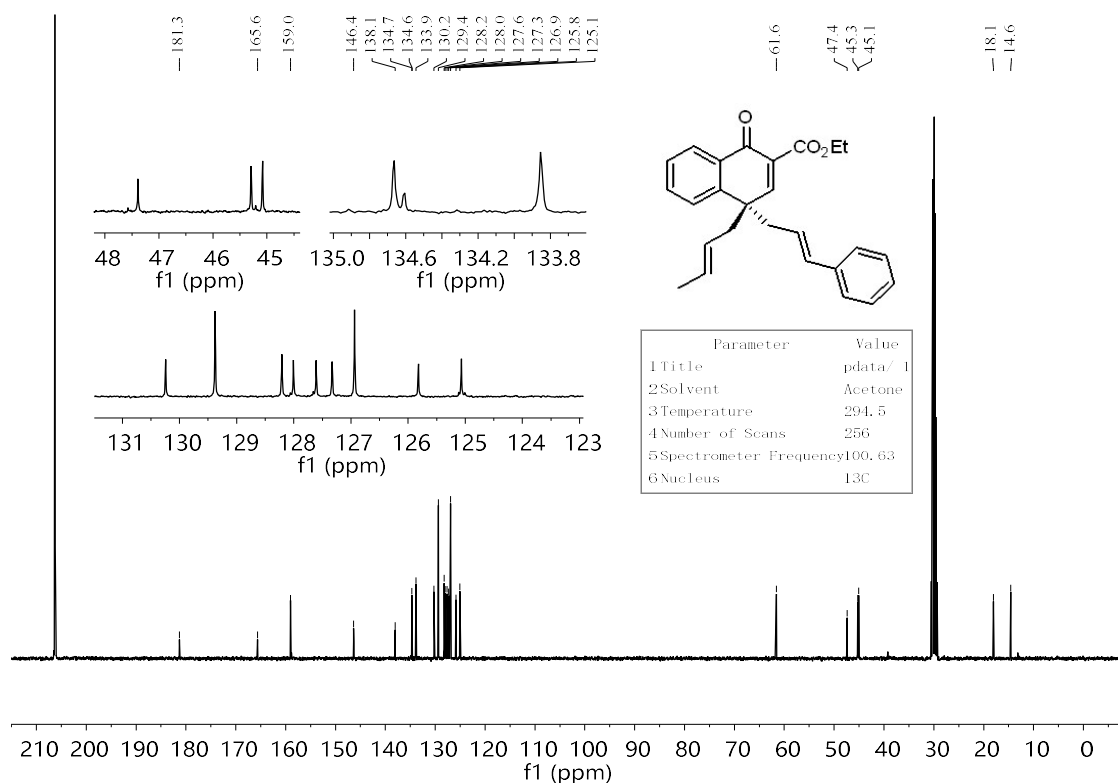

**Ethyl (R)-4-((E)-but-2-en-1-yl)-4-cinnamyl-1-oxo-1,4-dihydronaphthalene-2-carboxylate**

(*ent*-B40)

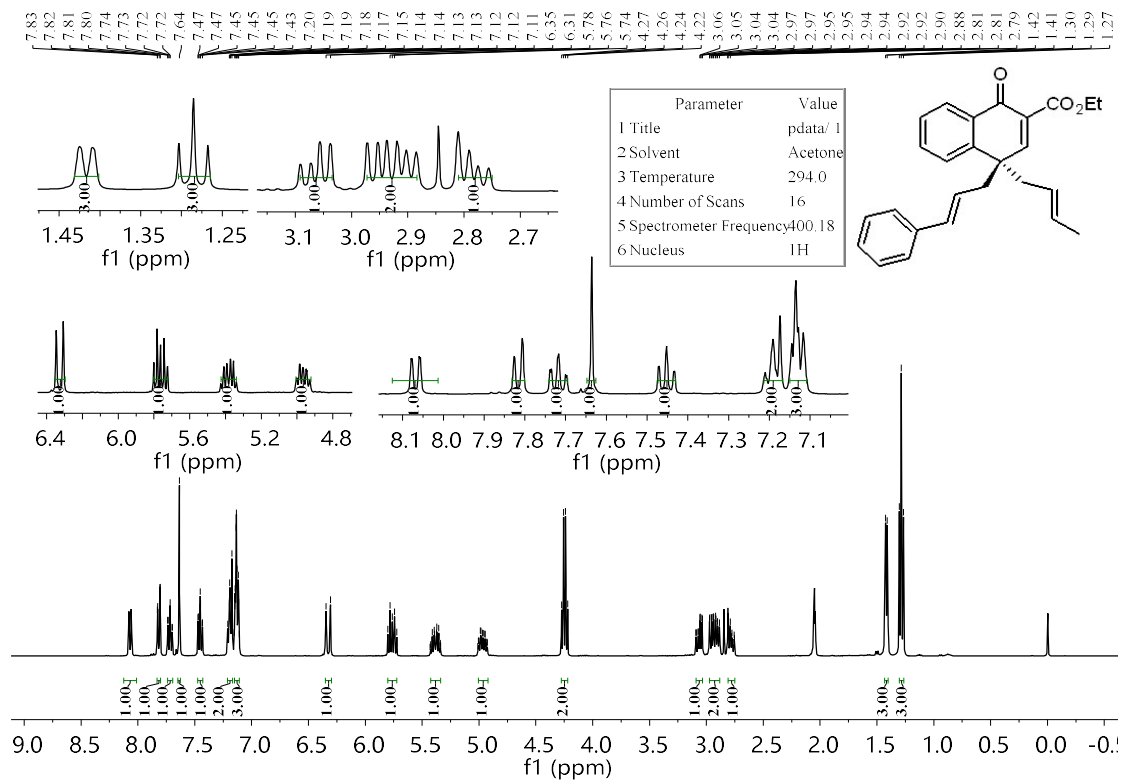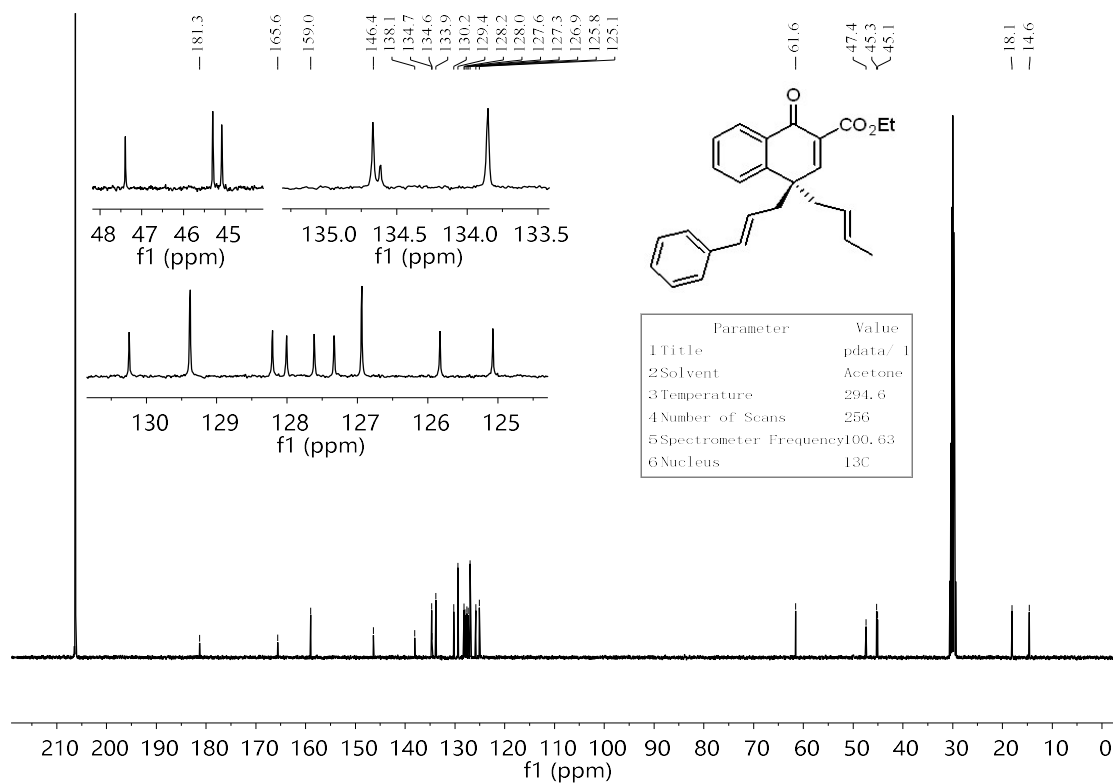



**Ethyl (R)-4-cinnamyl-1-oxo-4-((1-tosyl-1H-1,2,3-triazol-4-yl)methyl)-1,4-dihydronaphthalene-2-Carboxylate**

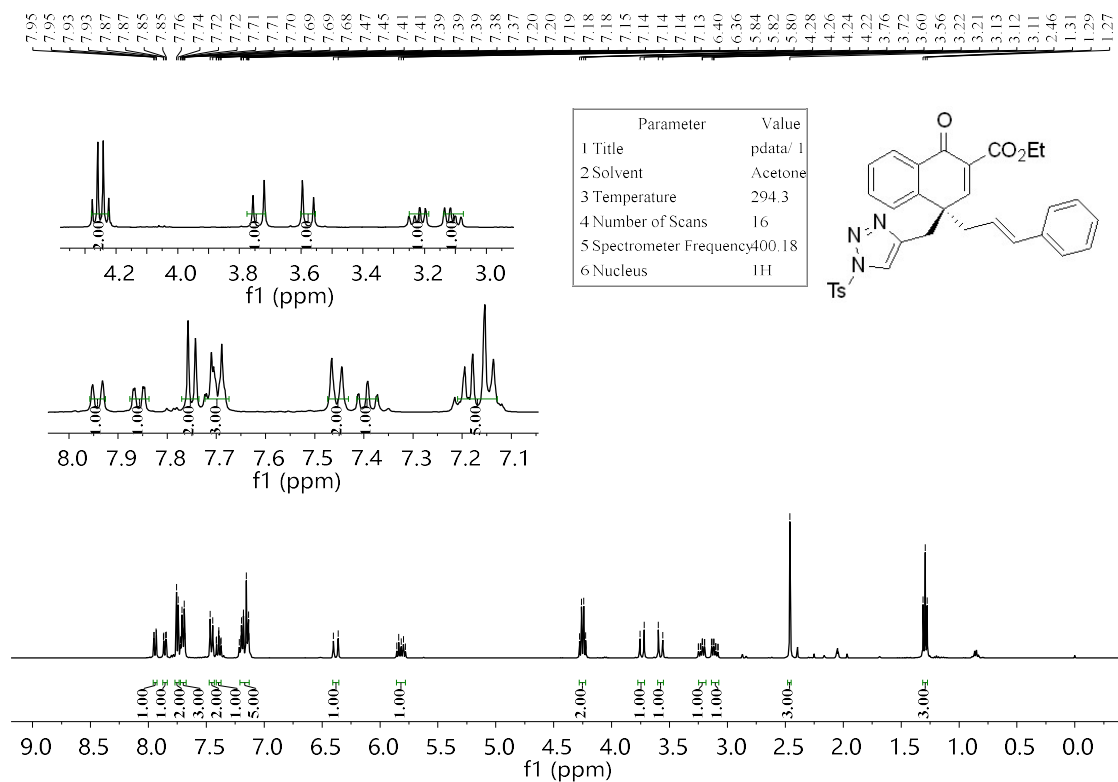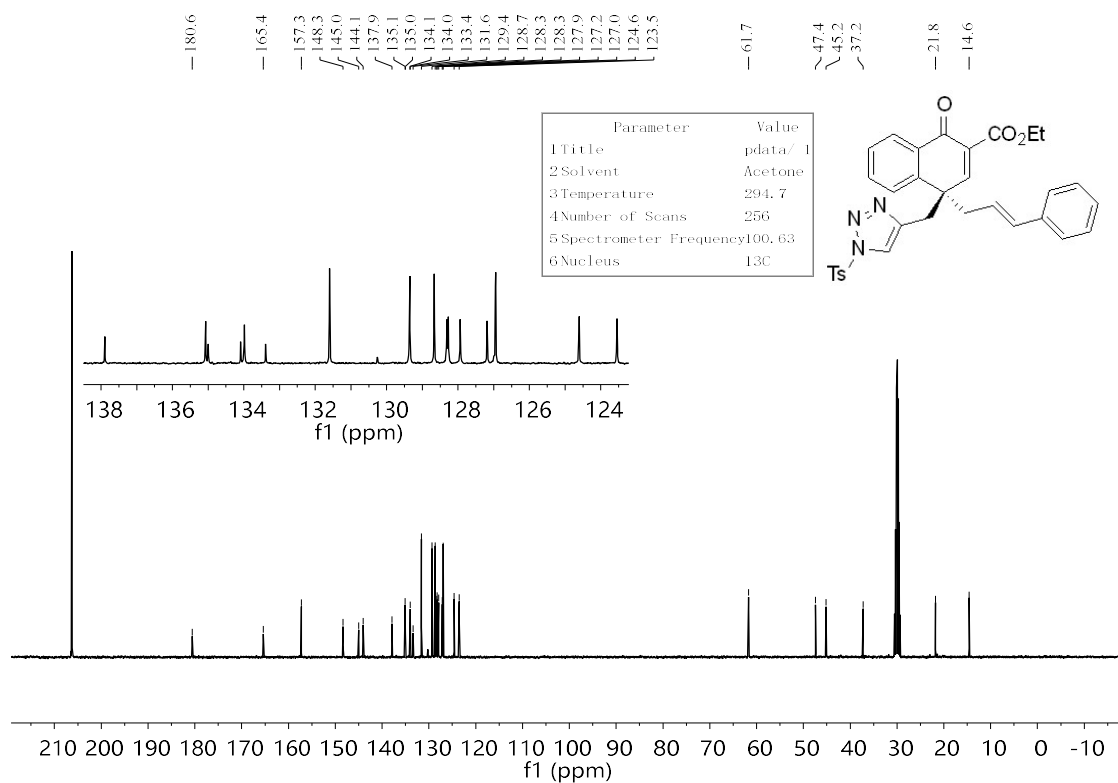

**(R)-2-acetyl-4-cinnamyl-4-(3-phenylprop-2-yn-1-yl)naphthalen-1(4H)-one (B45)**

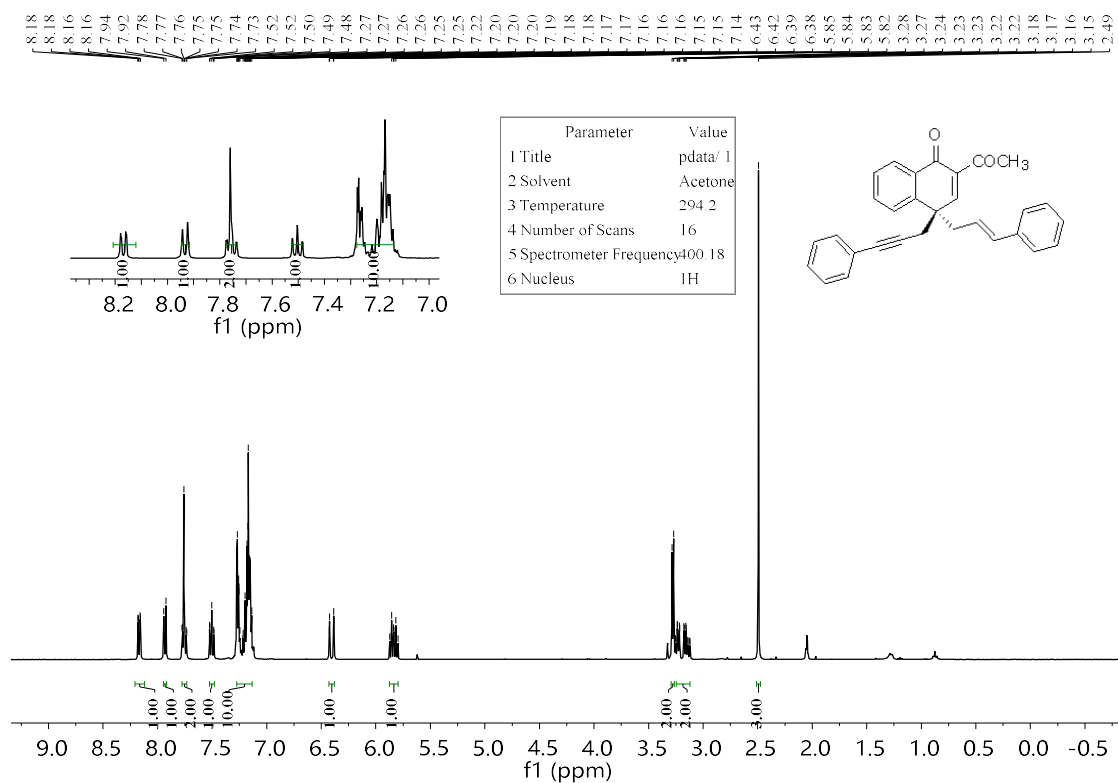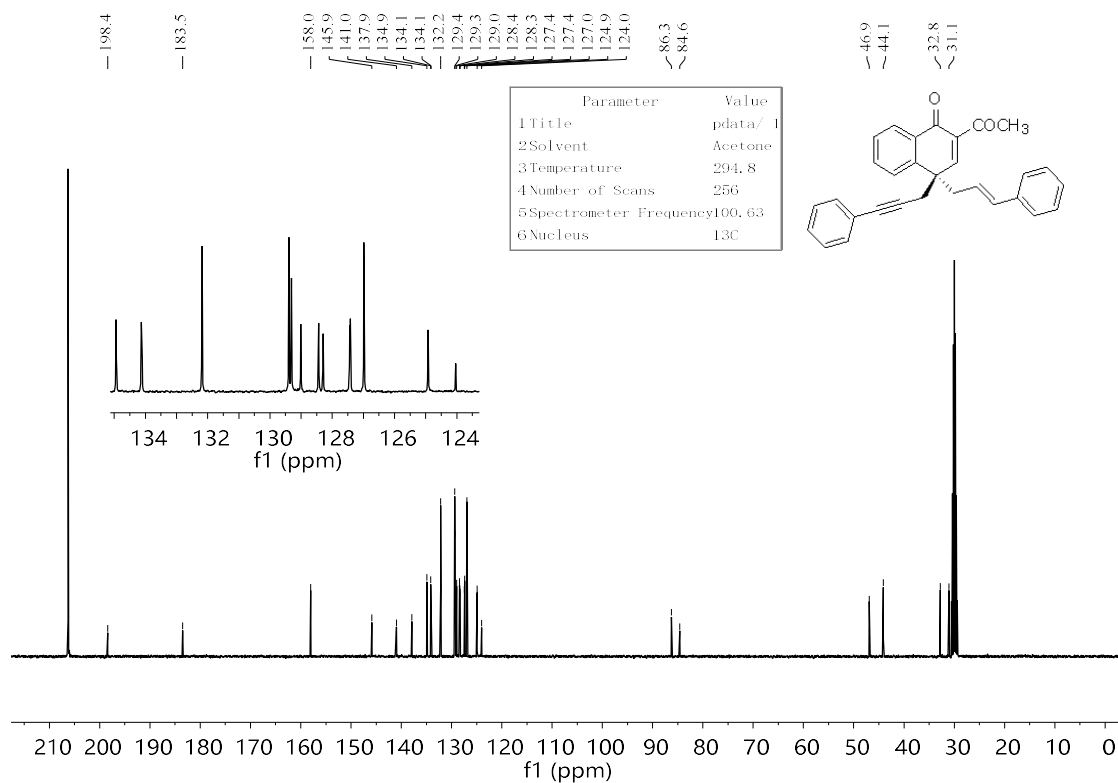

## 17. Copies of NMR Spectra for the Reaction Substrates

### Ethyl 1-(cinnamyloxy)-4-(3-phenylprop-2-yn-1-yl)-2-naphthoate (A1)

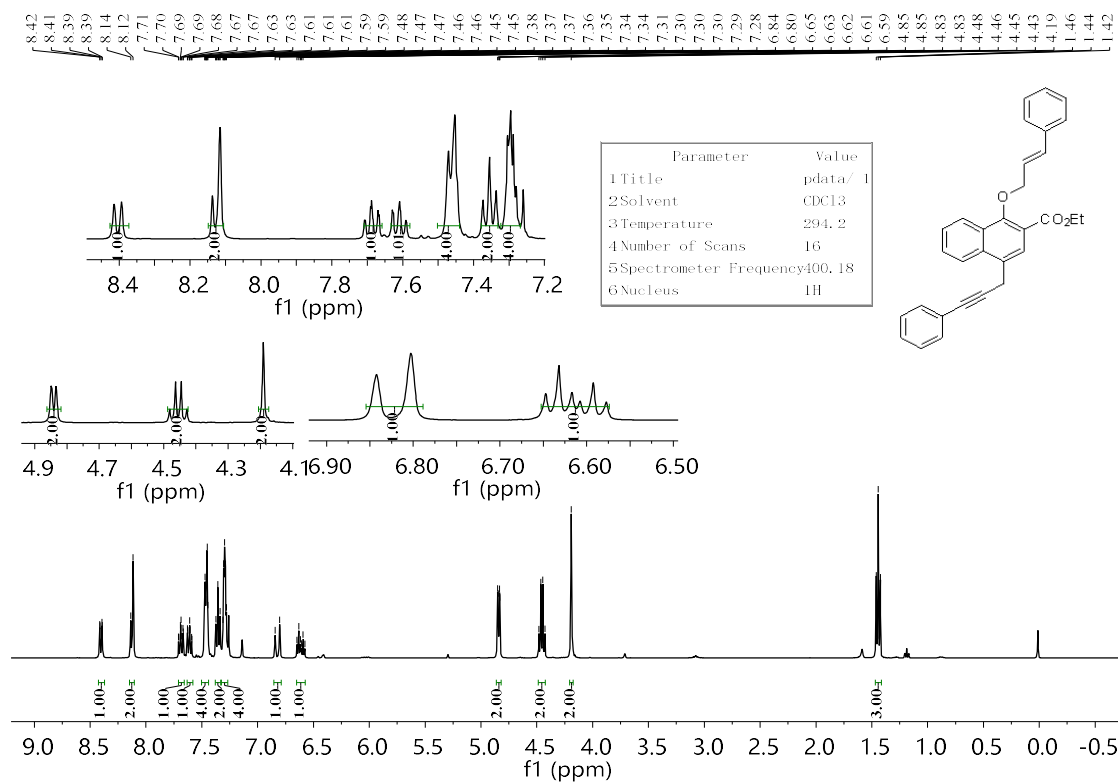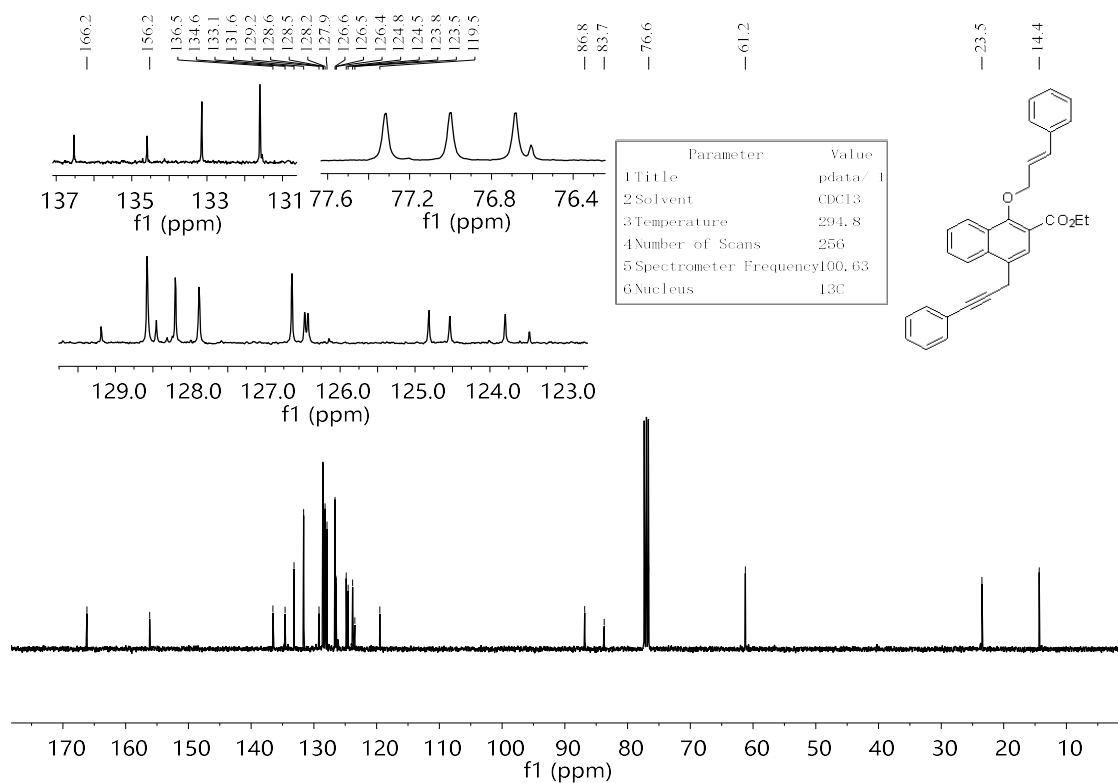

**Methyl 1-(cinnamyloxy)-4-(3-phenylprop-2-yn-1-yl)-2-naphthoate (A2)**

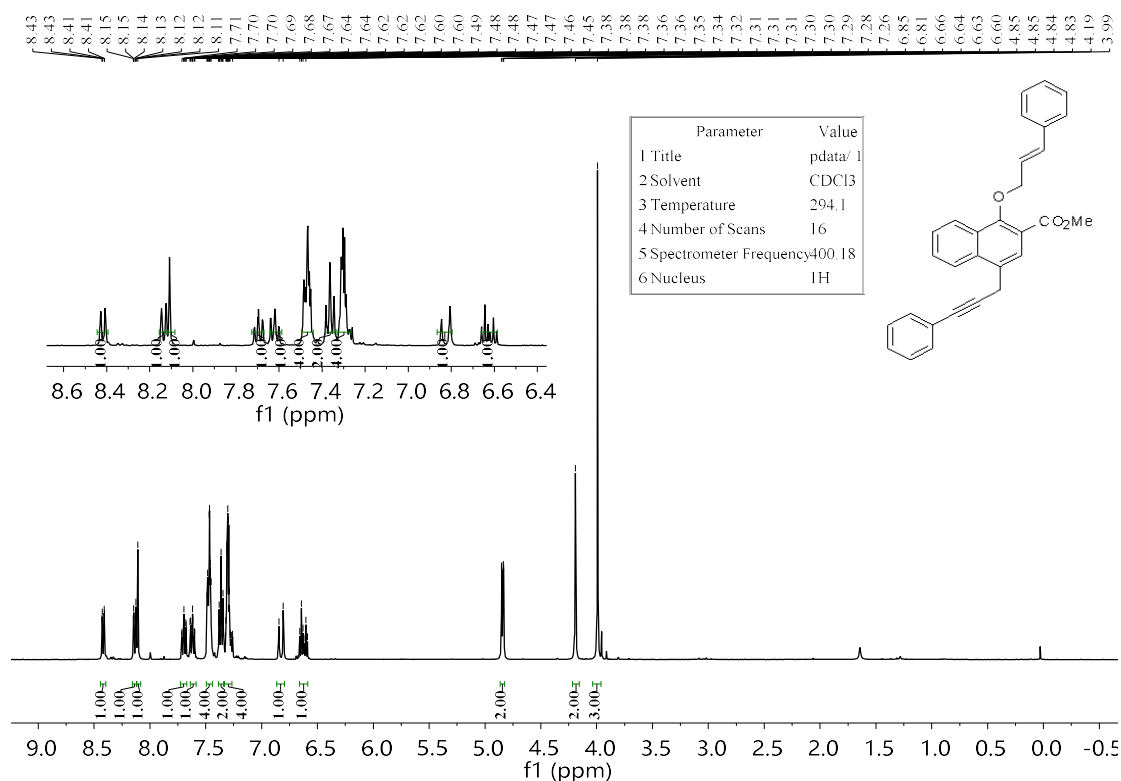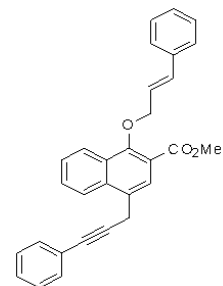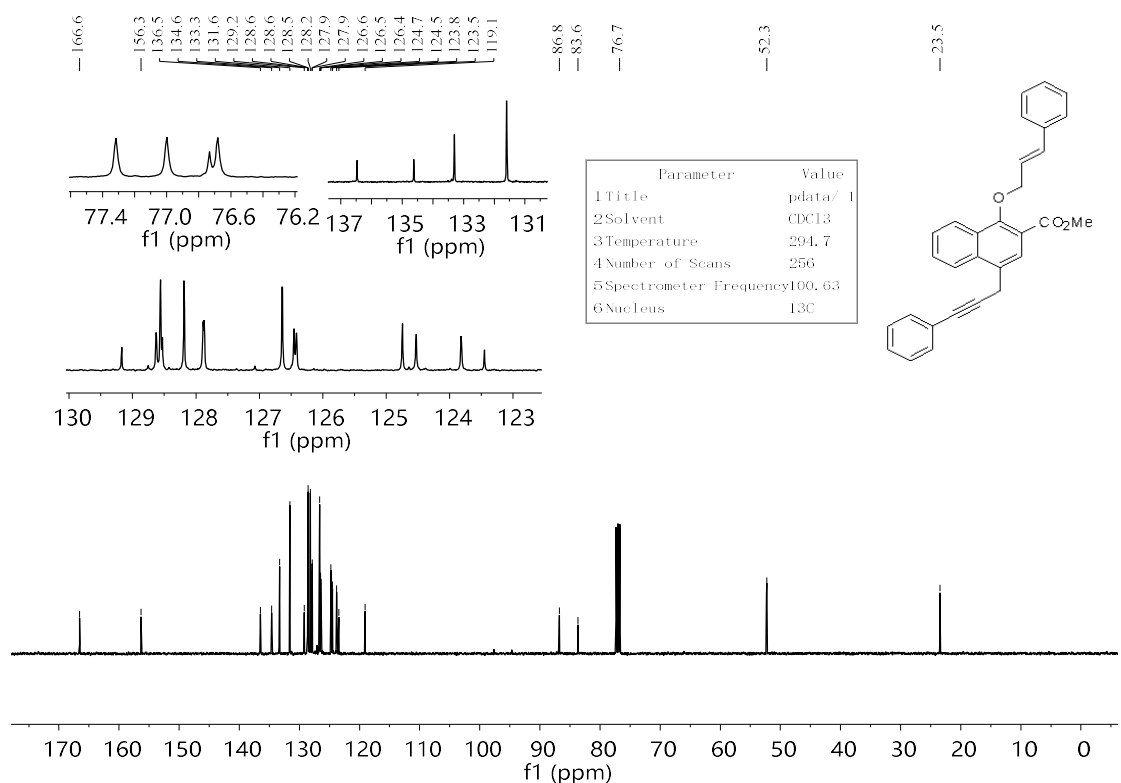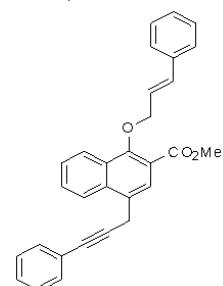

### Isopropyl 1-(cinnamyloxy)-4-(3-phenylprop-2-yn-1-yl)-2-naphthoate (A3)

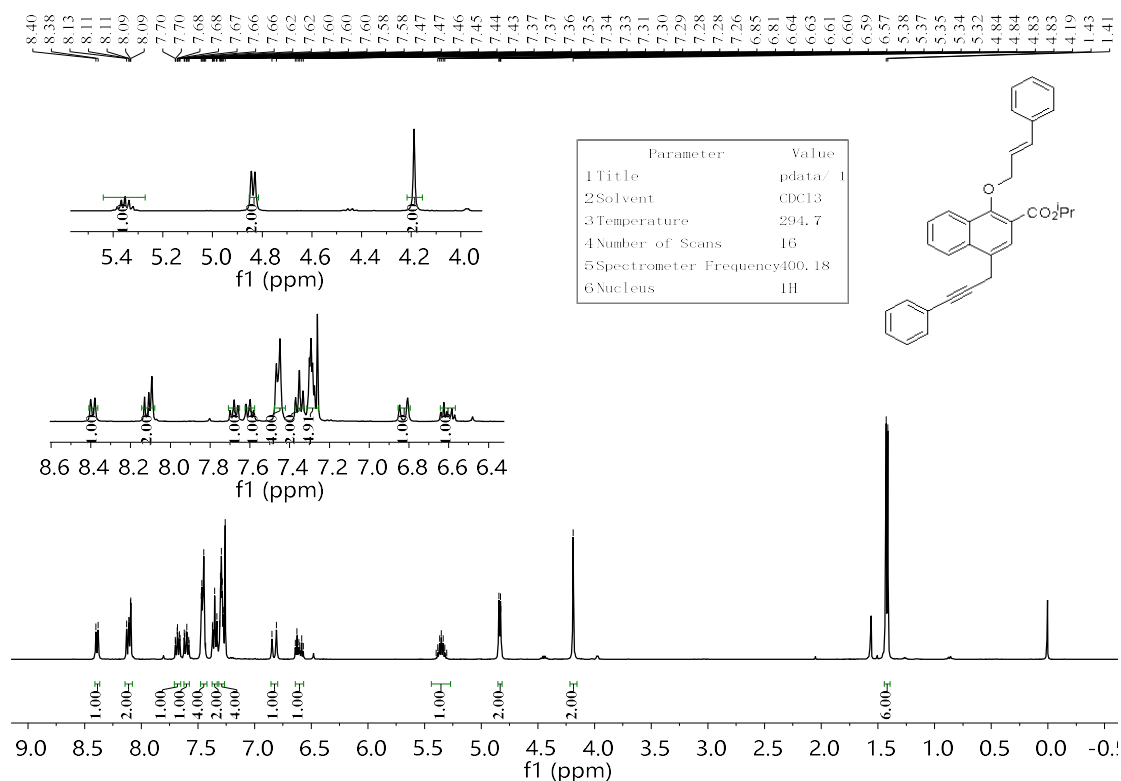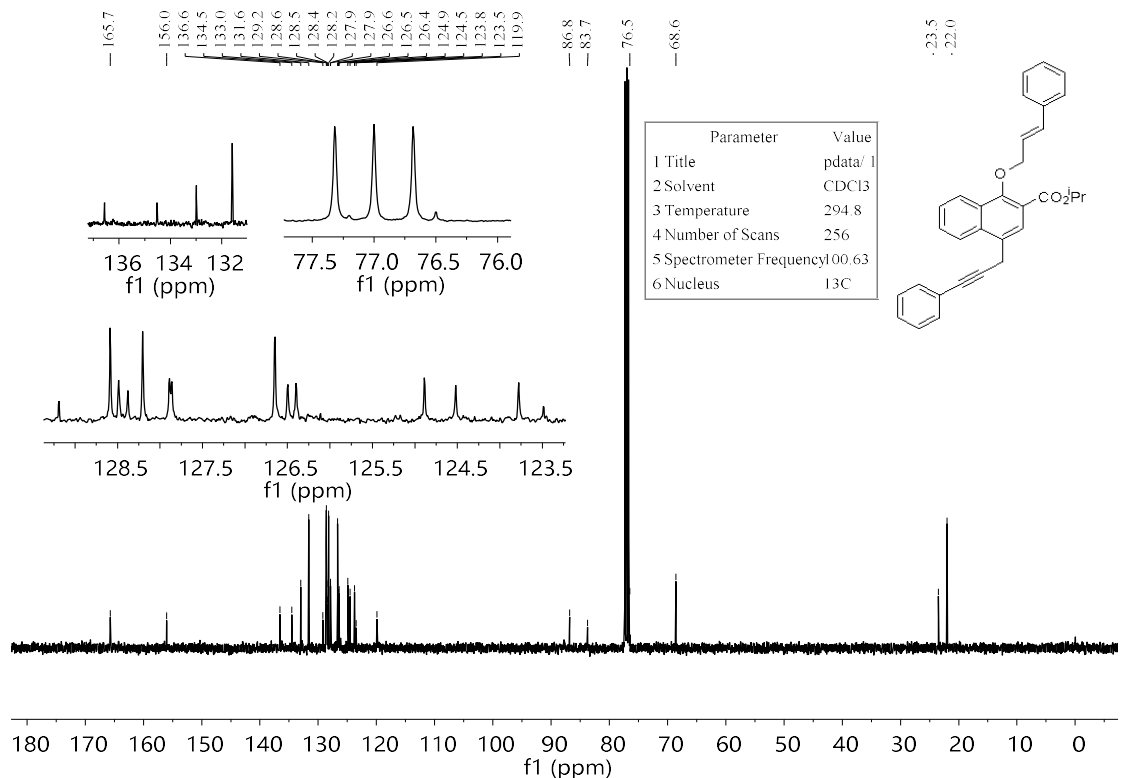

**Phenyl 1-(cinnamyloxy)-4-(3-phenylprop-2-yn-1-yl)-2-naphthoate (A4)**

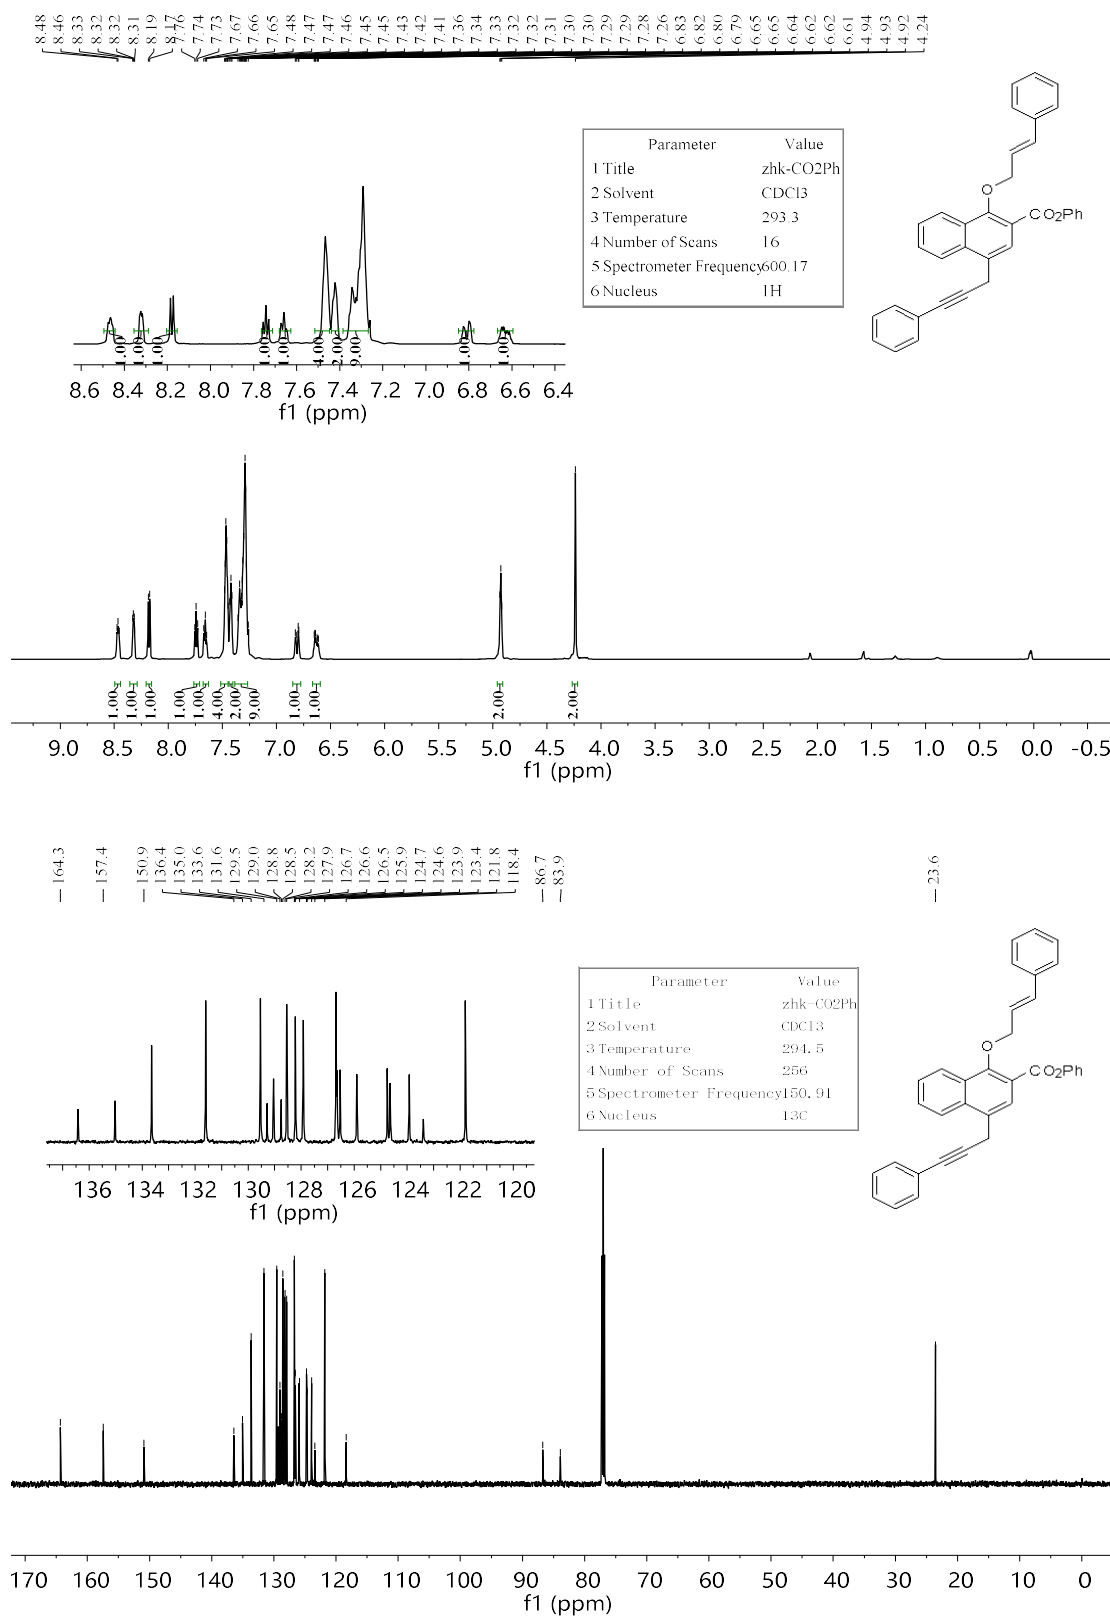

**Ethyl 1-(cinnamyloxy)-4-(prop-2-yn-1-yl)-2-naphthoate (A5)**

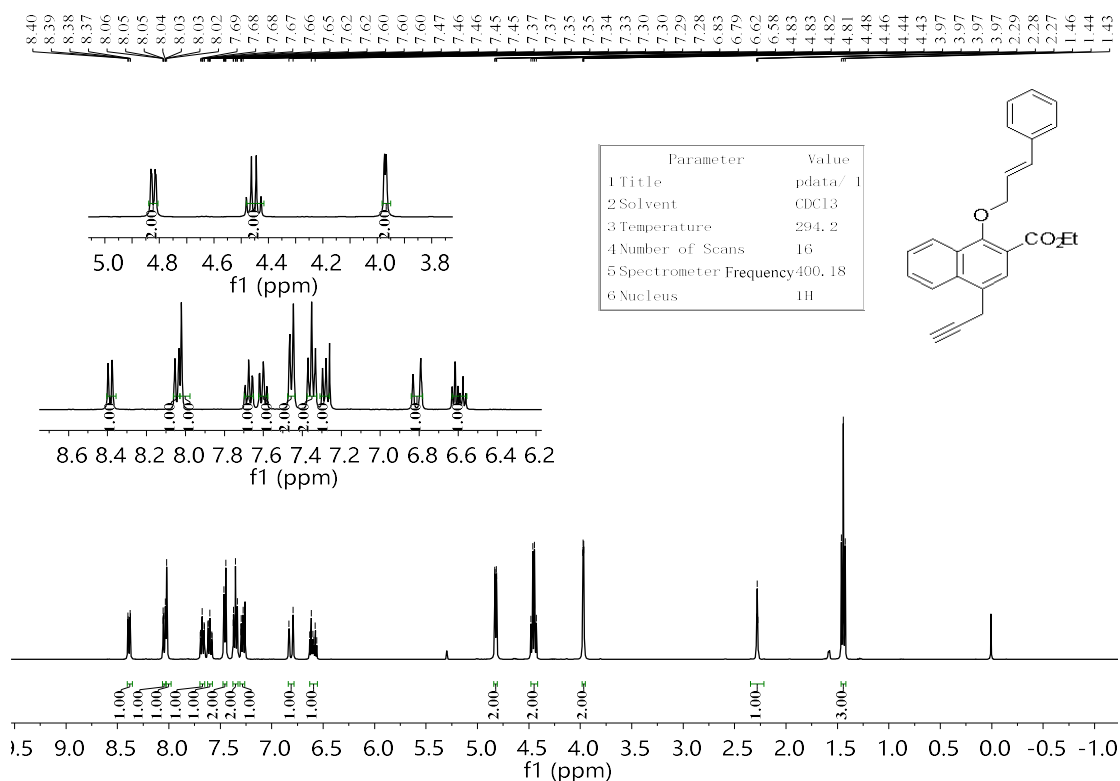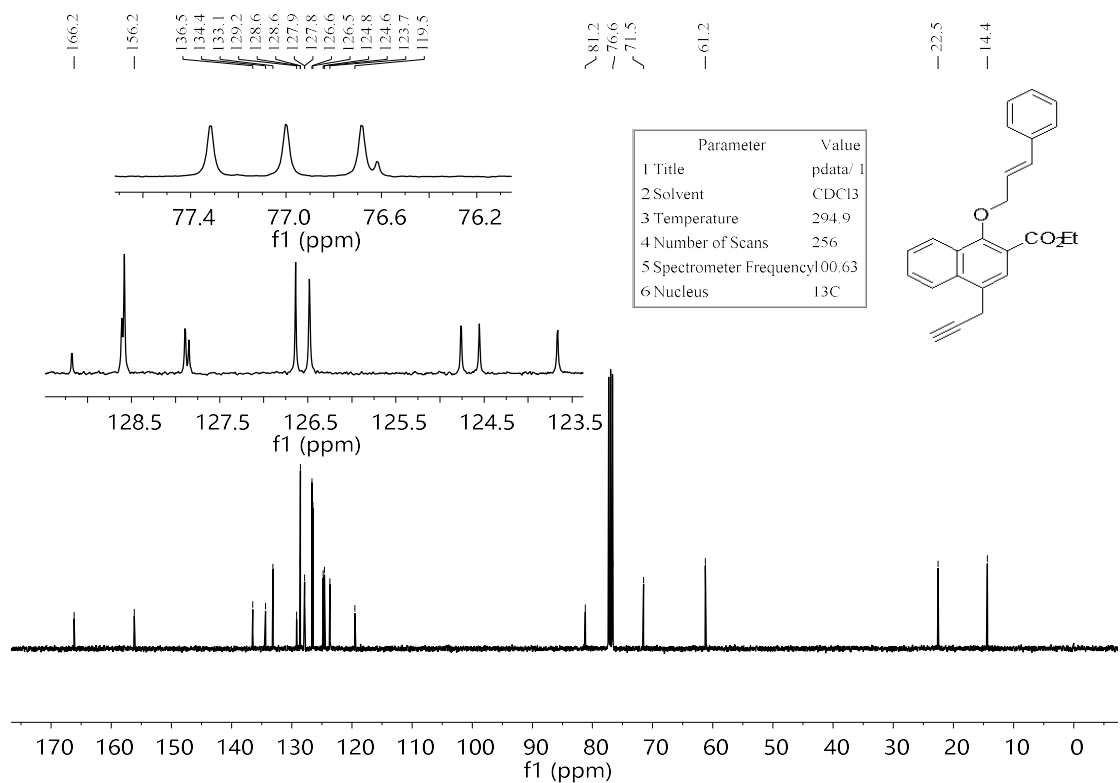

### Ethyl 1-(cinnamyloxy)-4-(ethoxymethyl)-2-naphthoate (A6)

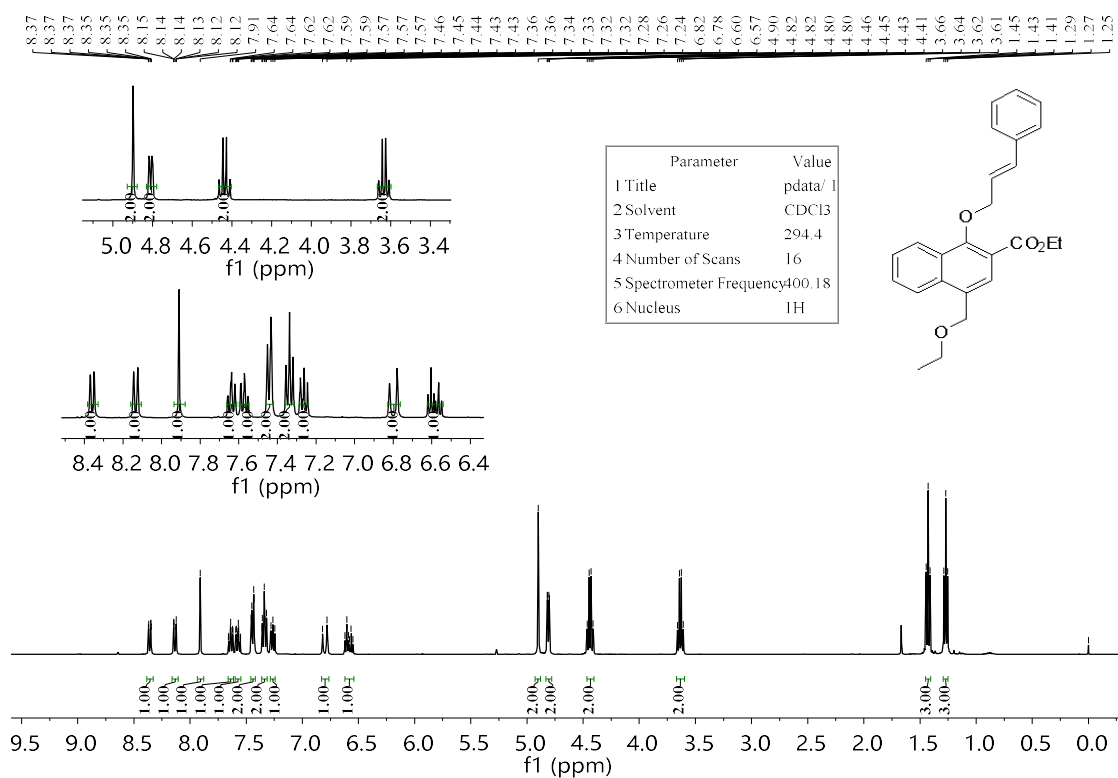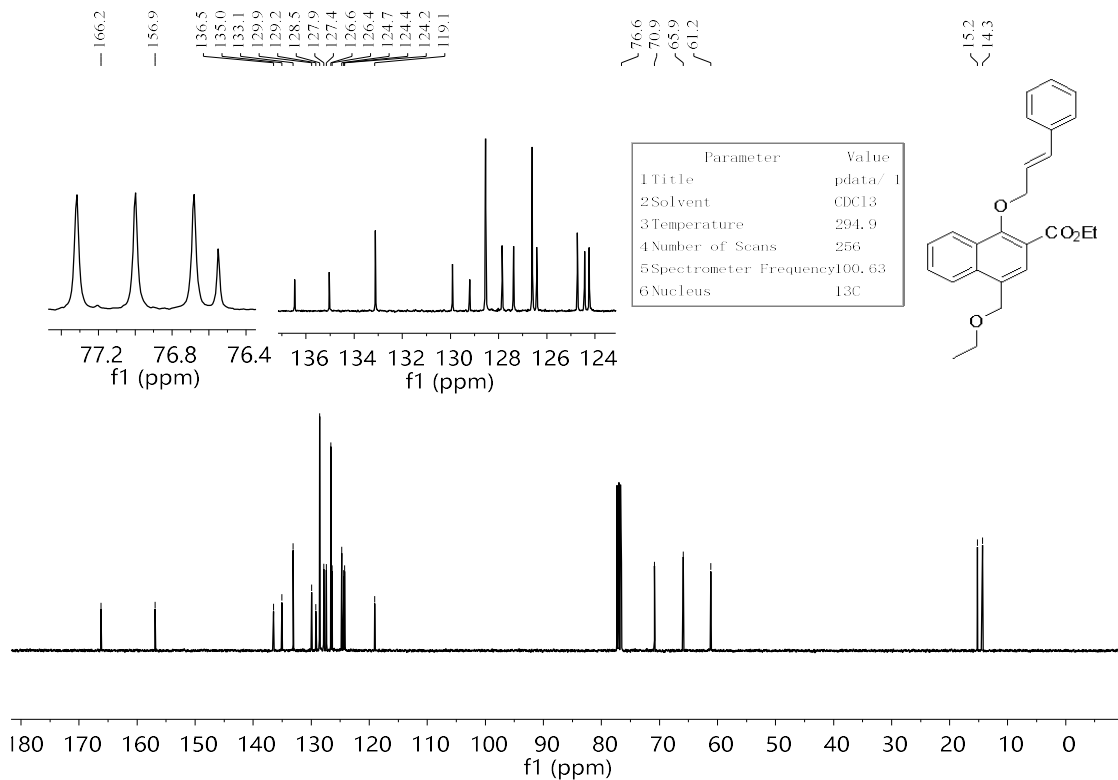



### Ethyl 4-benzyl-1-(cinnamyloxy)-2-naphthoate (A7)

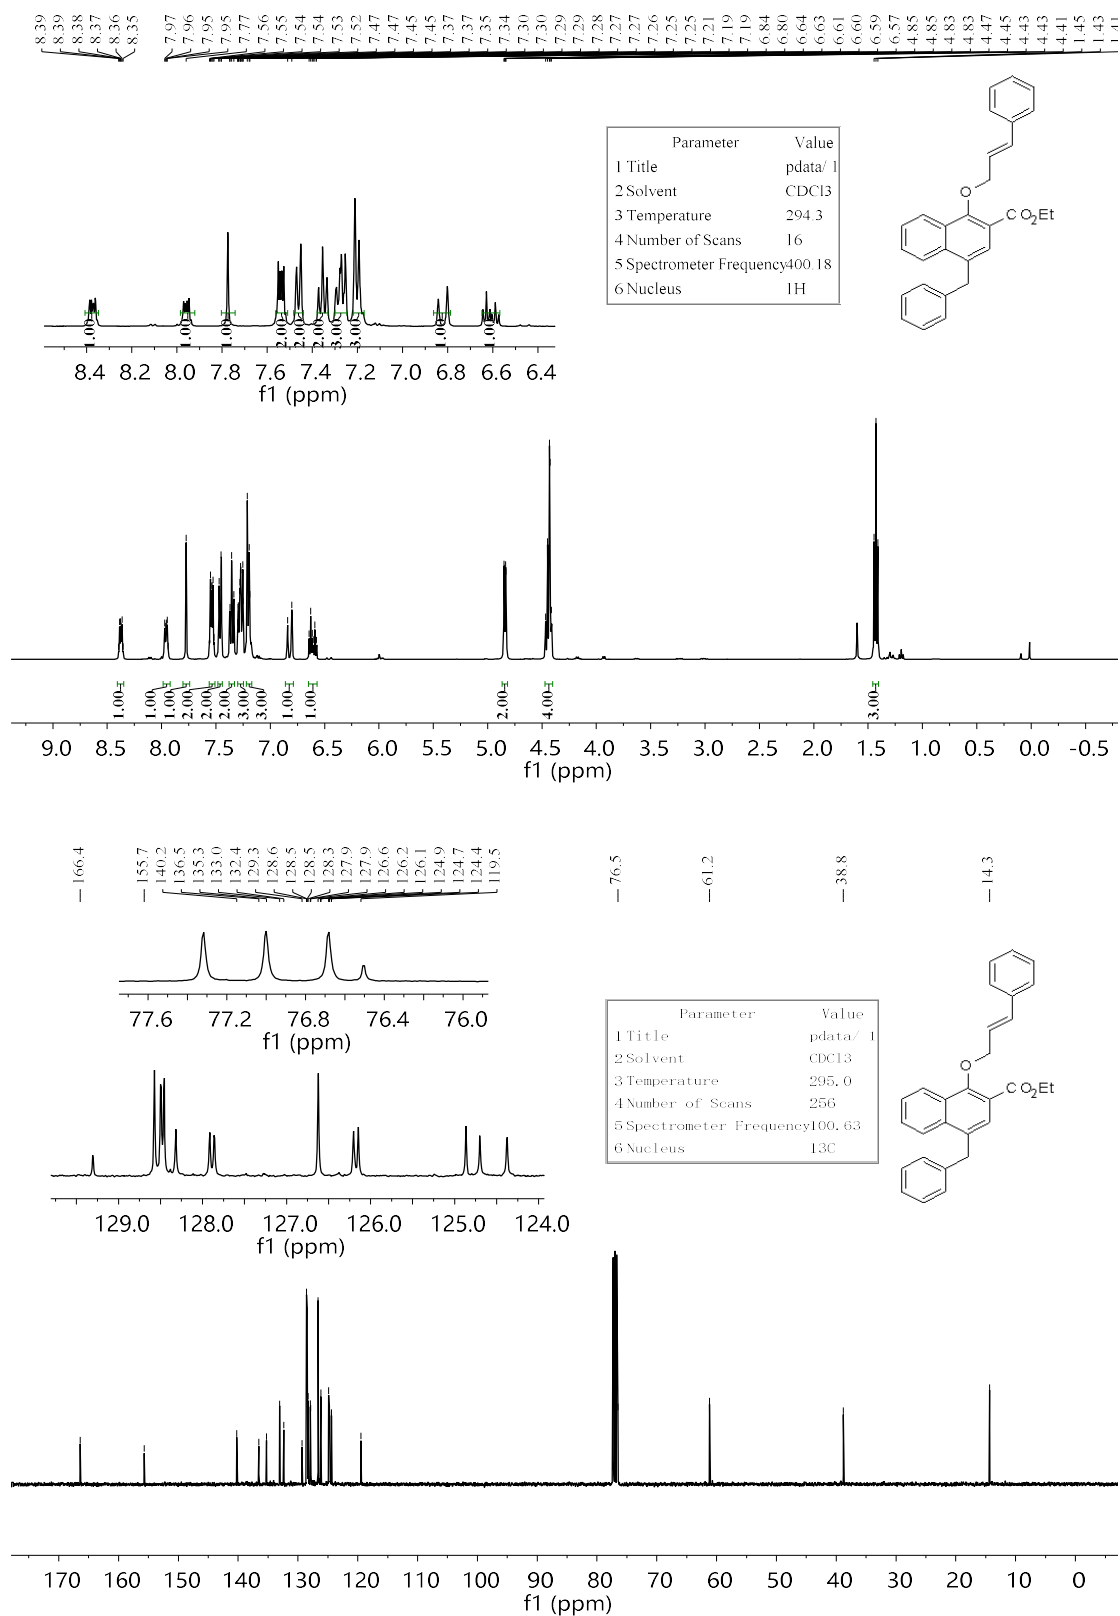

### Ethyl 4-chloro-1-(cinnamyloxy)-2-naphthoate (A8)

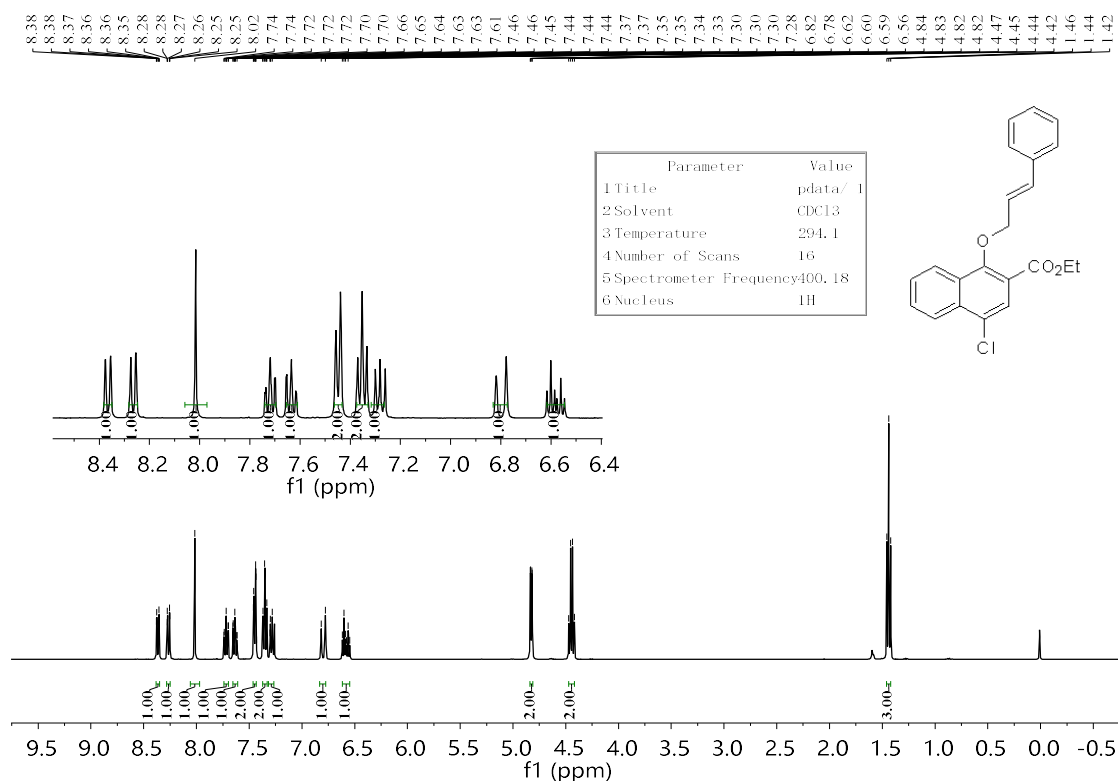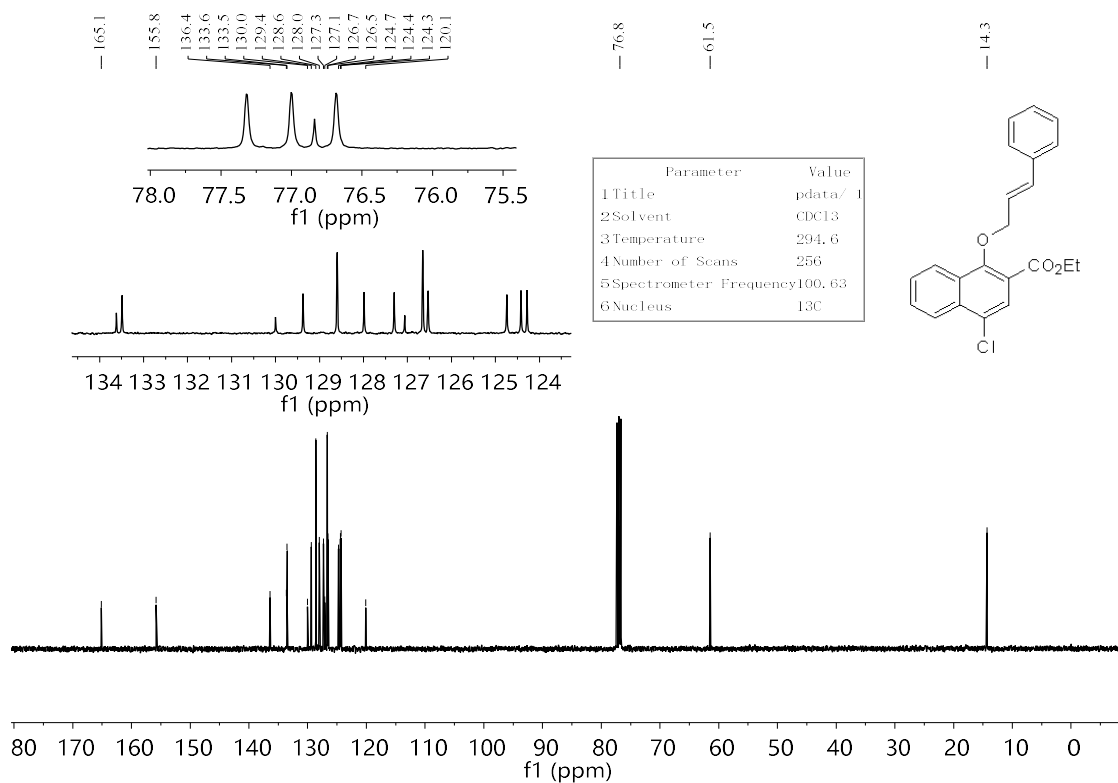

### Ethyl 1-(cinnamyloxy)-4-propyl-2-naphthoate (A9)

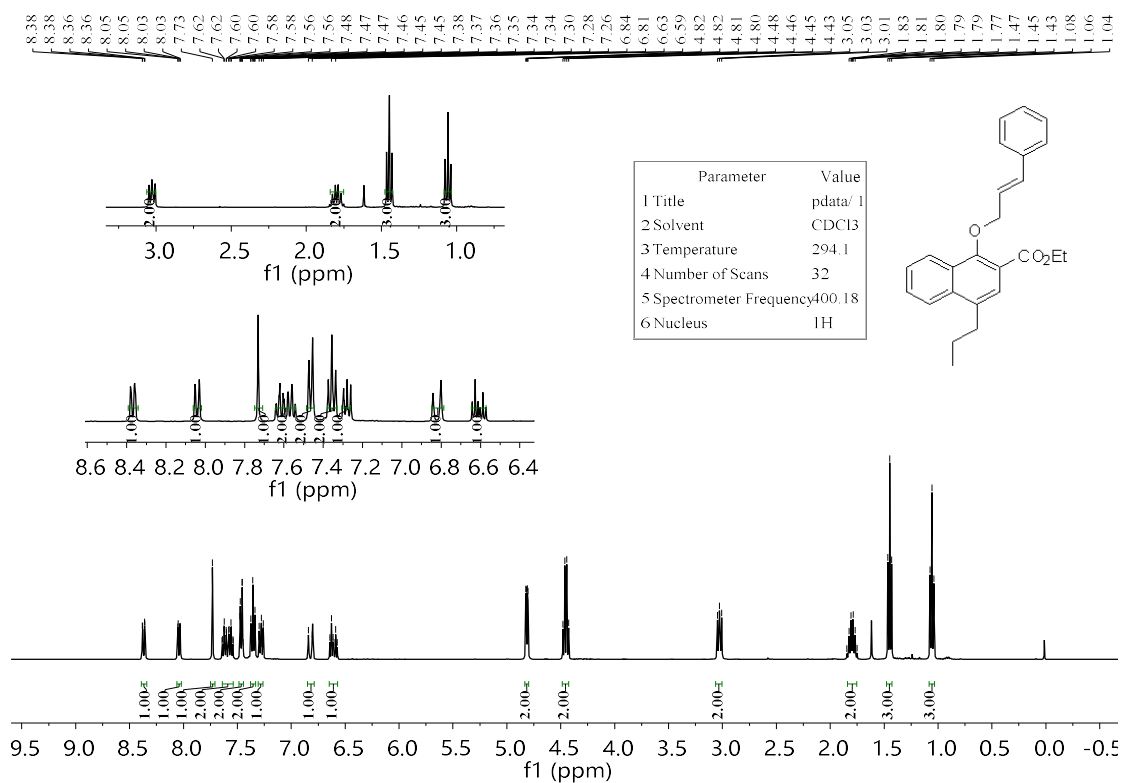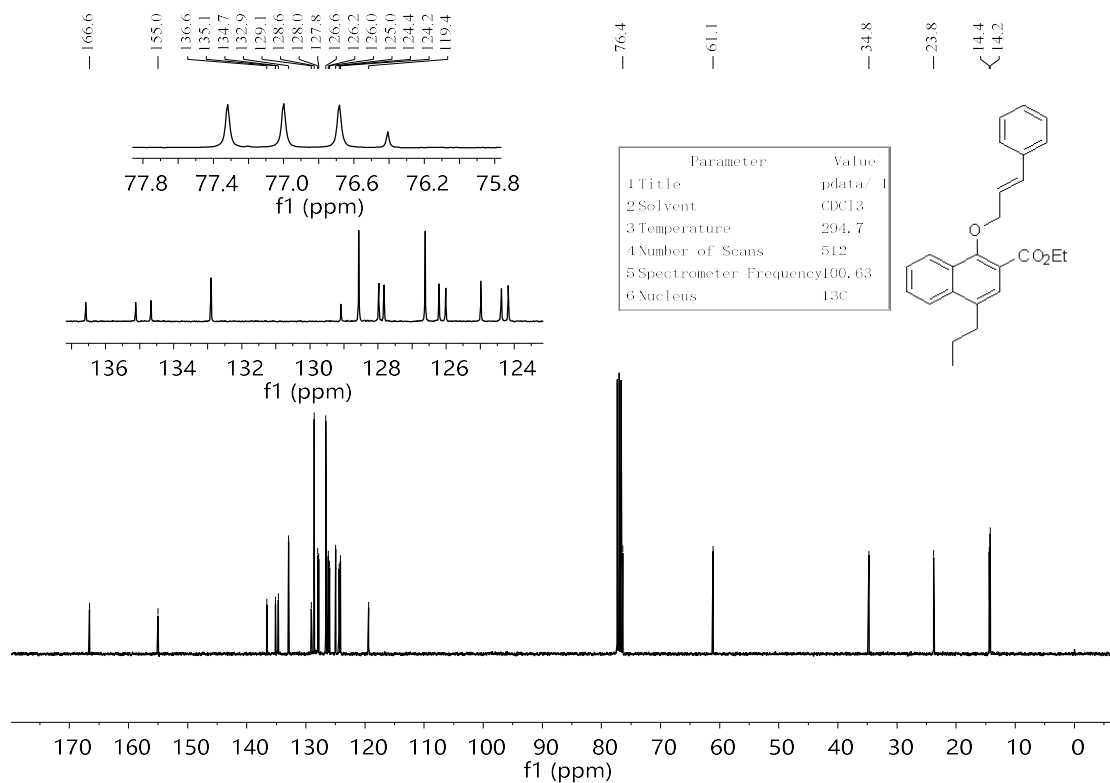

### Ethyl 1-(cinnamyloxy)-4-cyclopropyl-2-naphthoate (A10)

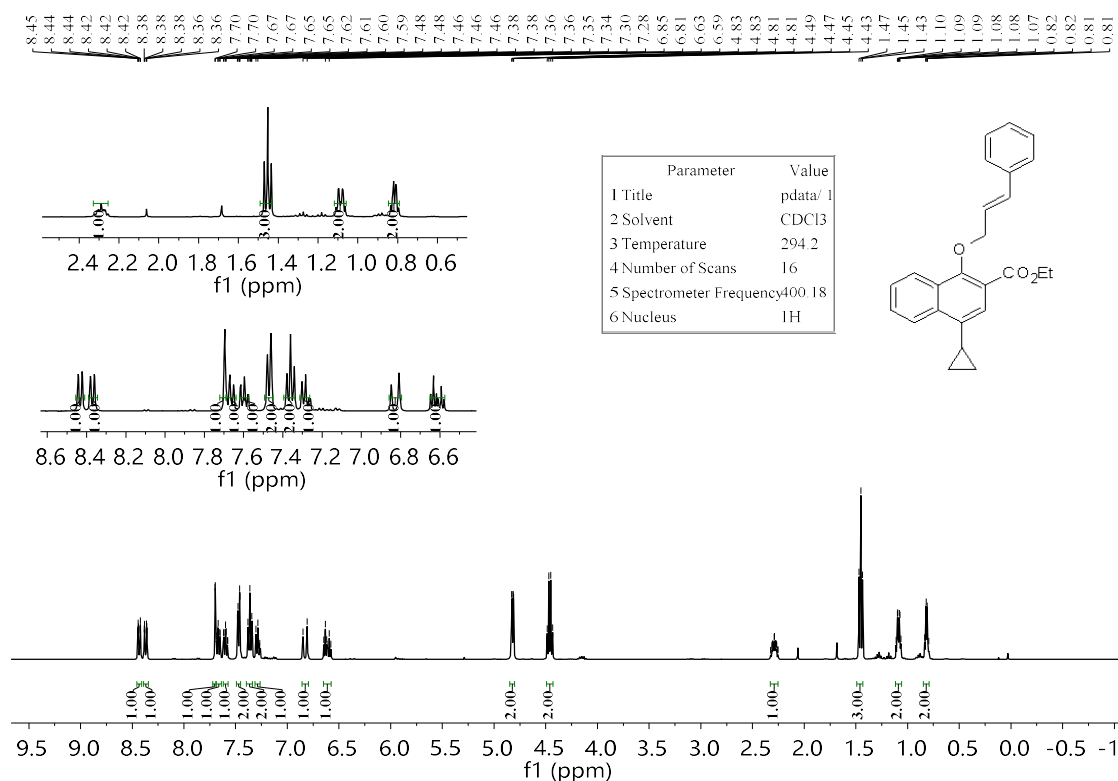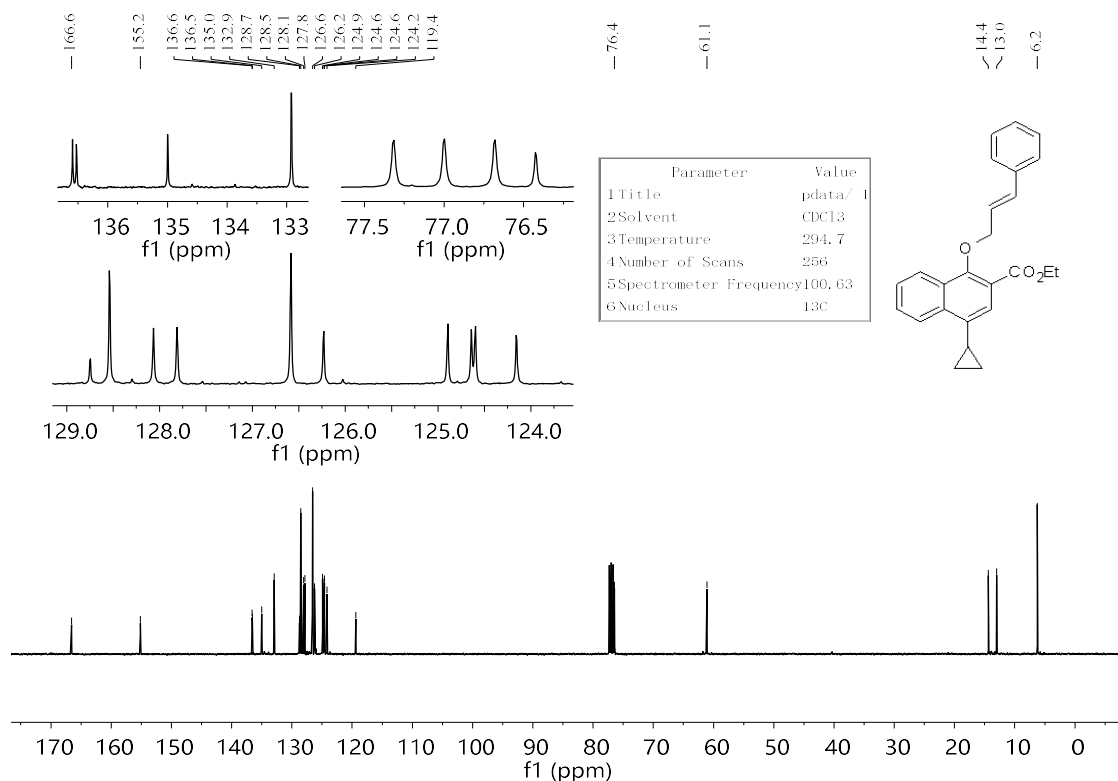

### 3-ethyl 1-methyl 4-(cinnamyloxy)naphthalene-1,3-dicarboxylate (A11)

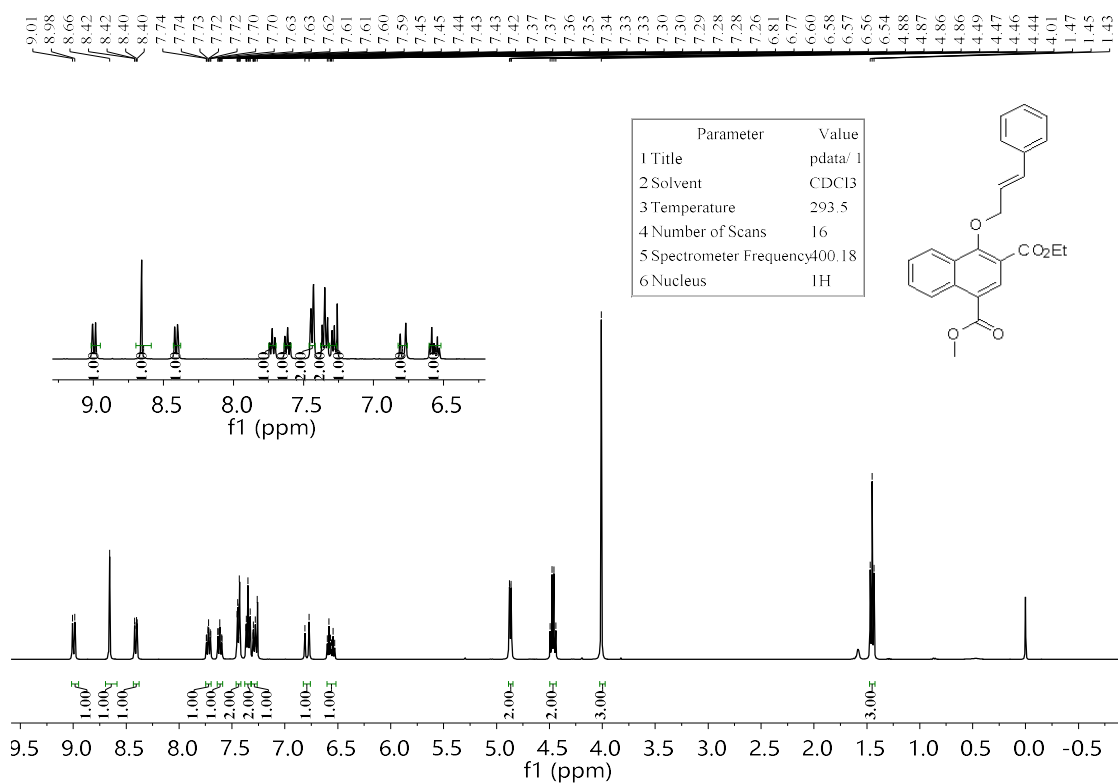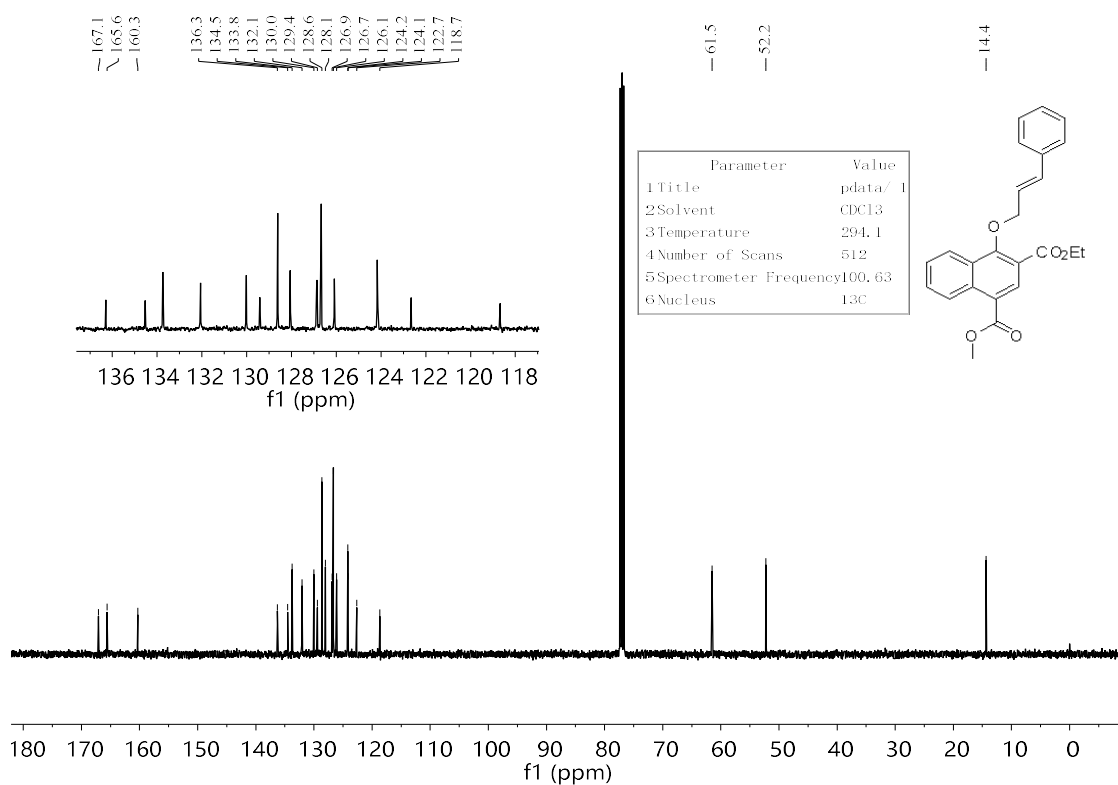

### Ethyl 1-(cinnamyloxy)-4-ethoxy-2-naphthoate (A12)

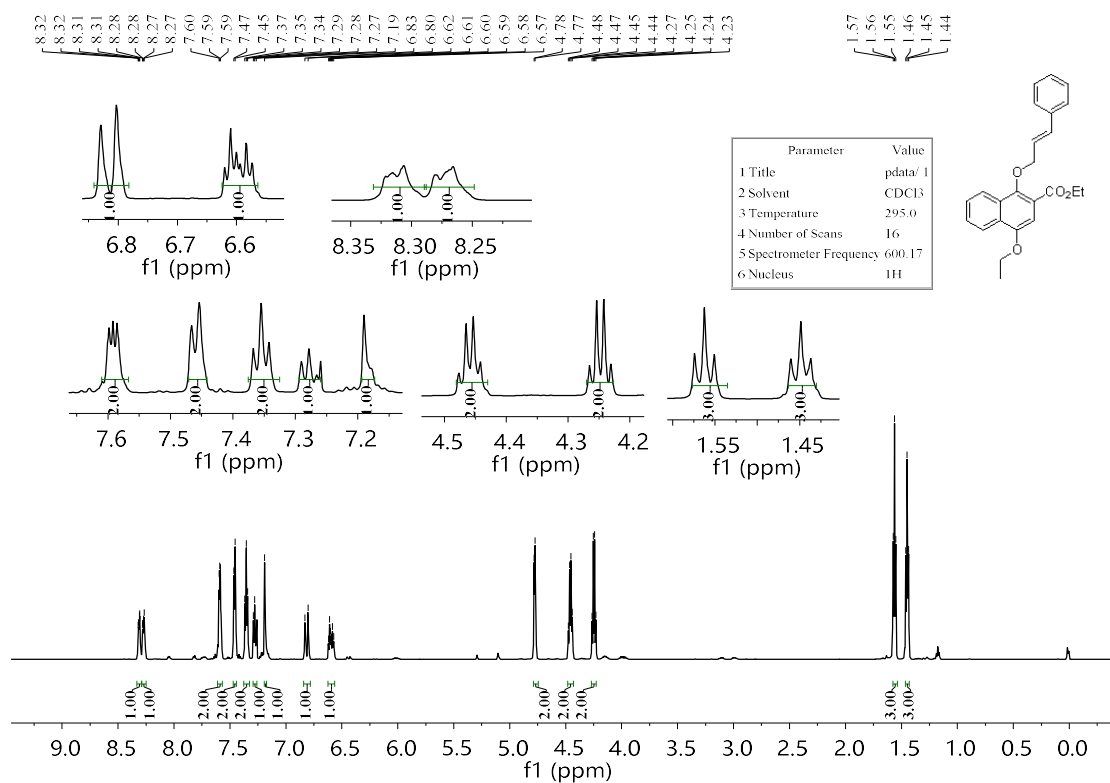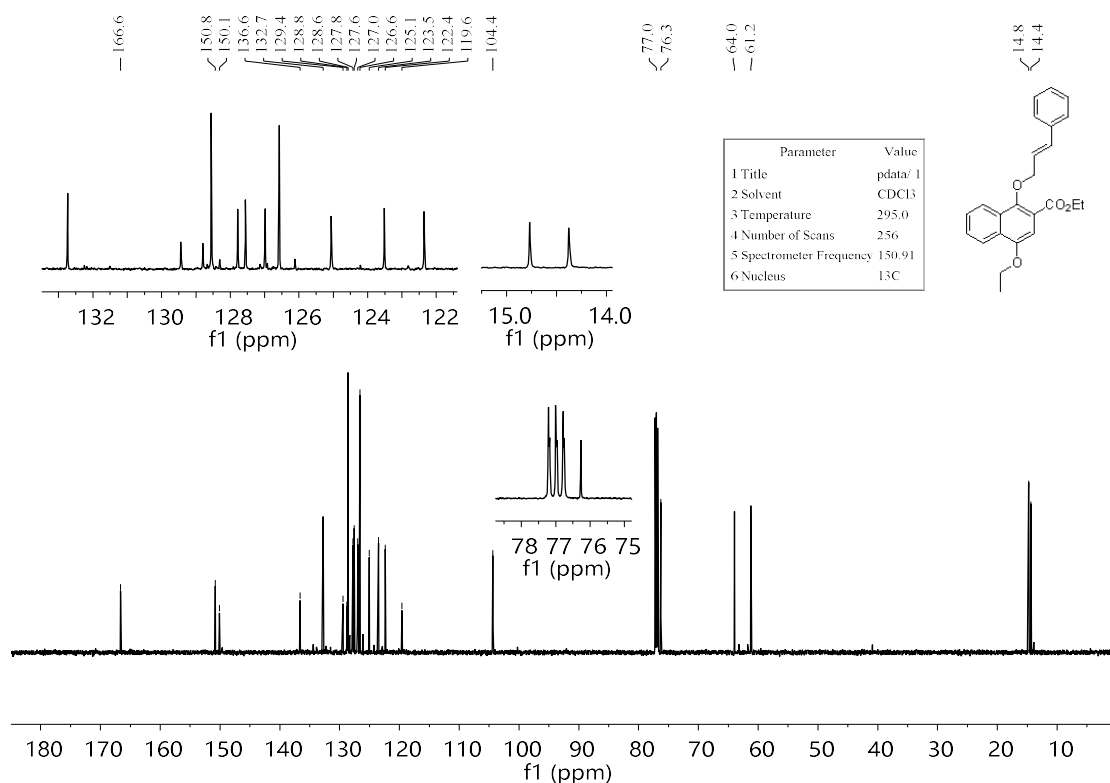

### Ethyl 4-benzyl-1-(cinnamyloxy)-6-methyl-2-naphthoate (A13)

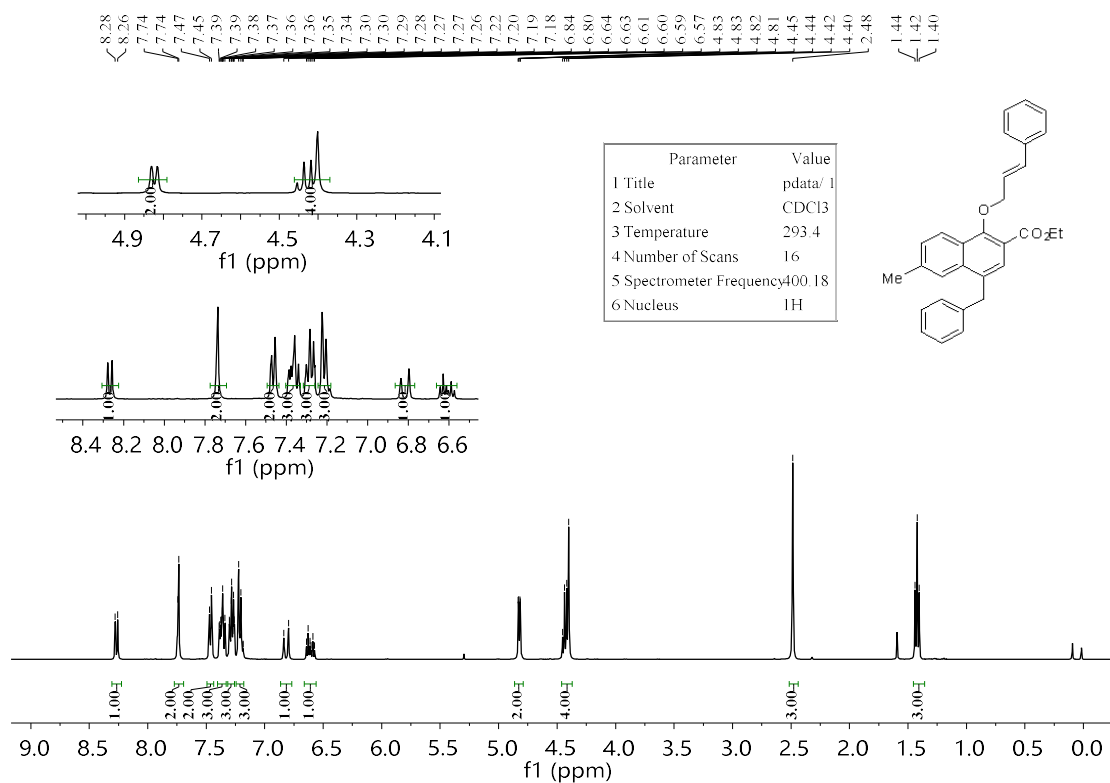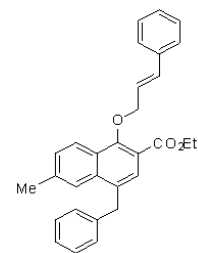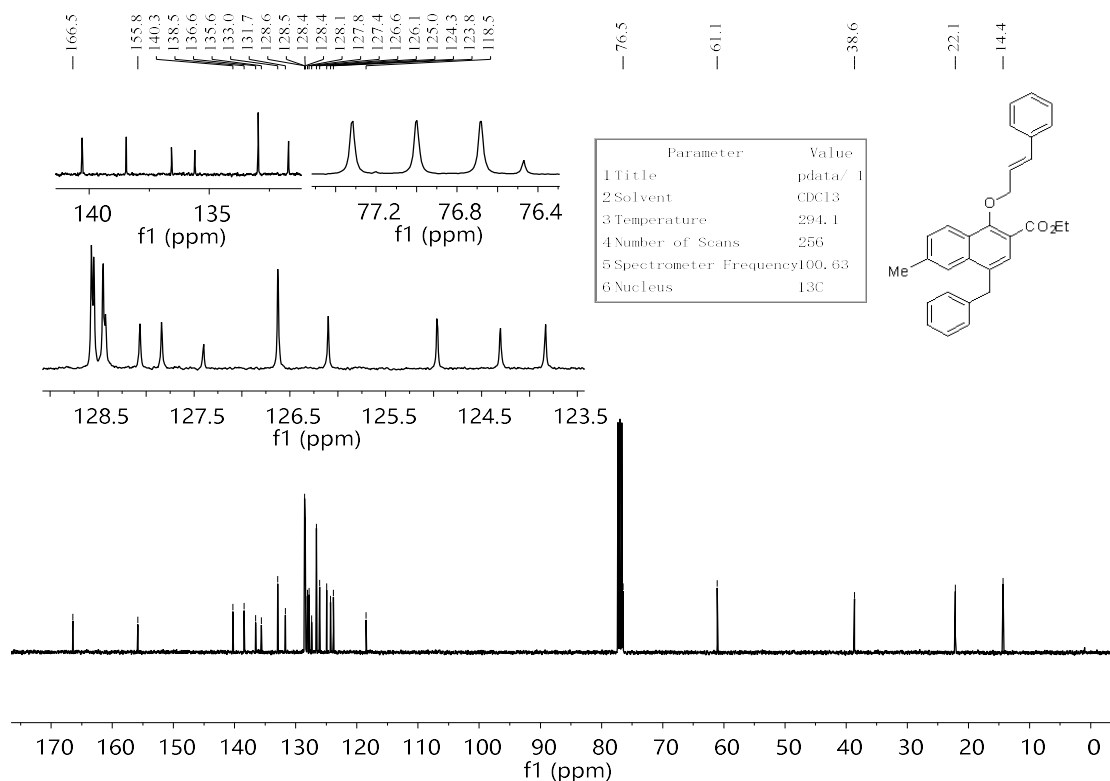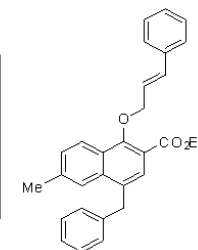

### Ethyl 4-benzyl-6-(tert-butyl)-1-(cinnamyloxy)-2-naphthoate (A14)

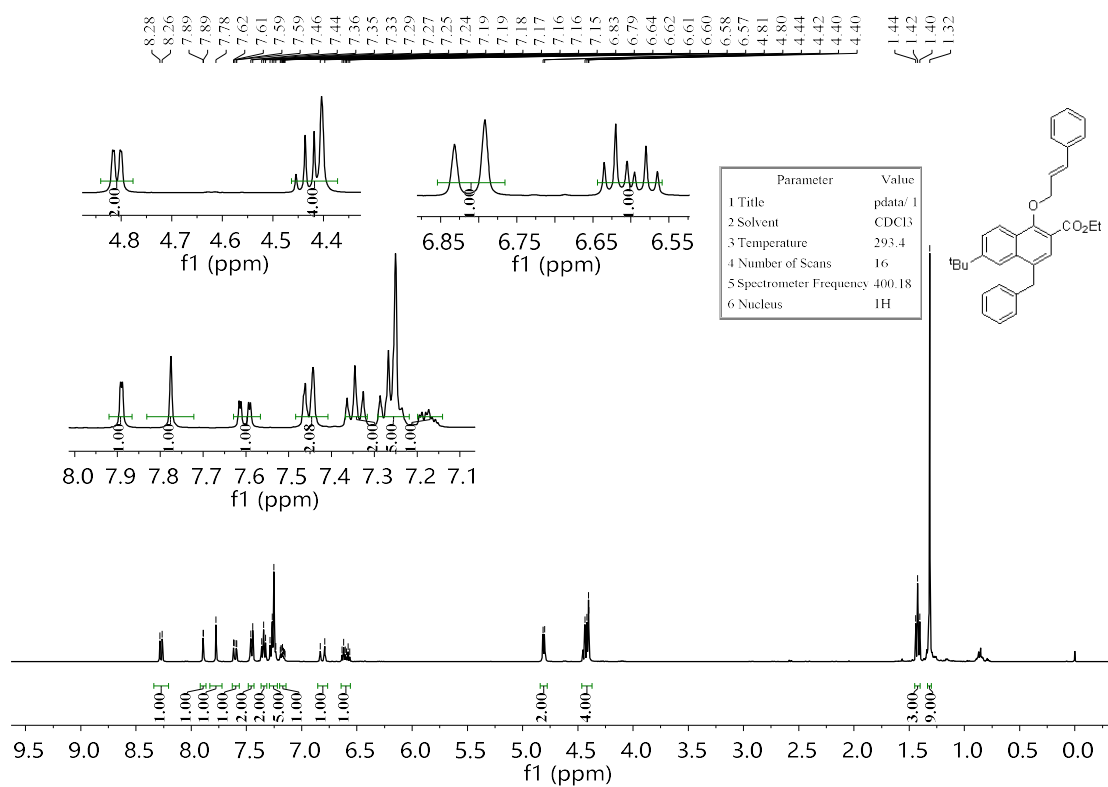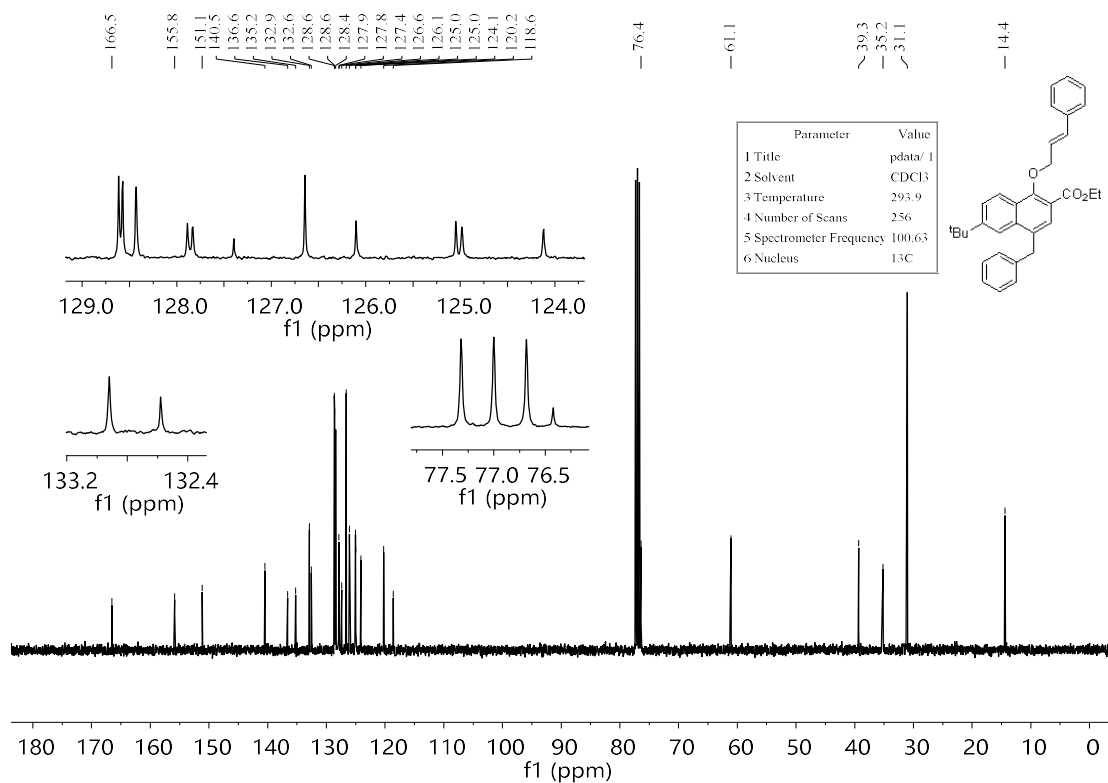



### Ethyl 4-benzyl-1-(cinnamyloxy)-6-phenyl-2-naphthoate (A15)

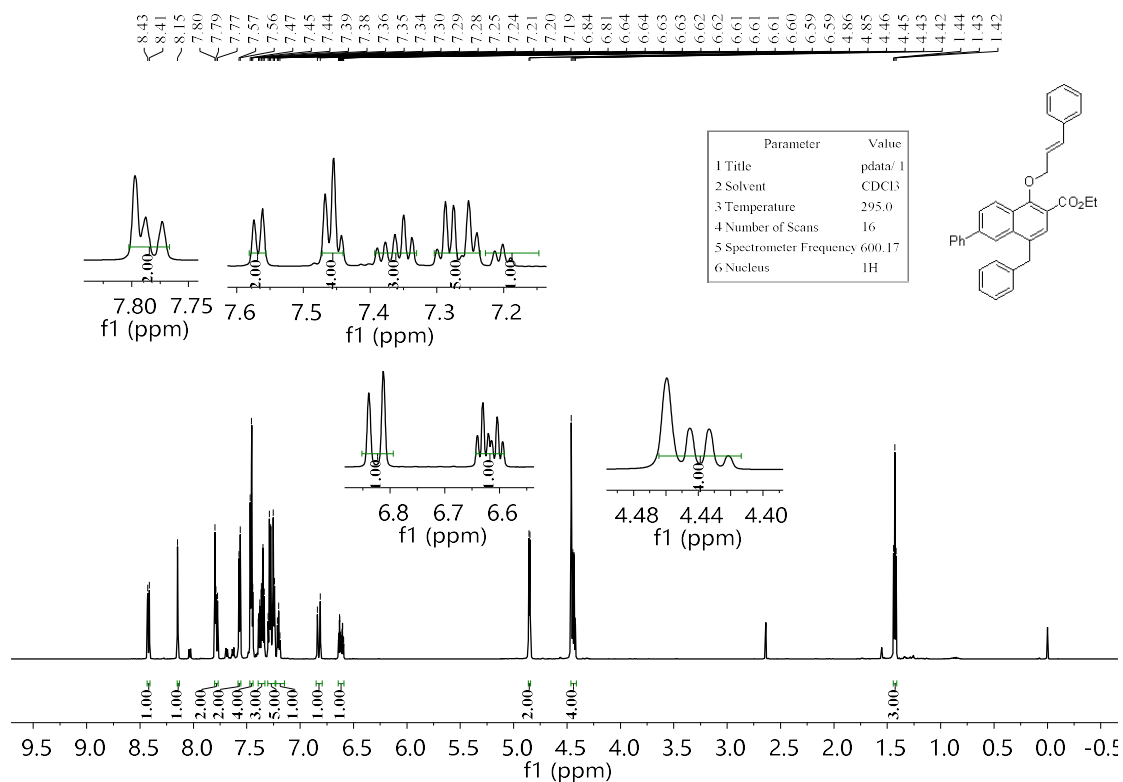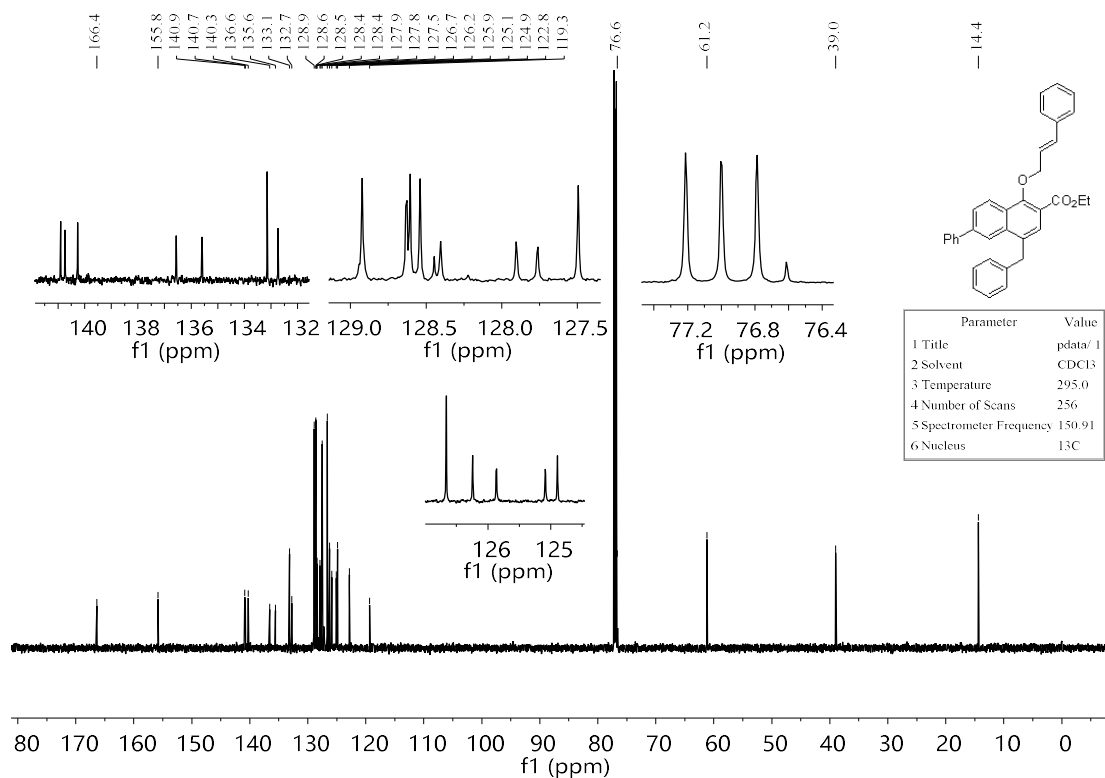

# Ethyl 4-benzyl-1-(cinnamyloxy)-6-methoxy-2-naphthoate (A16)

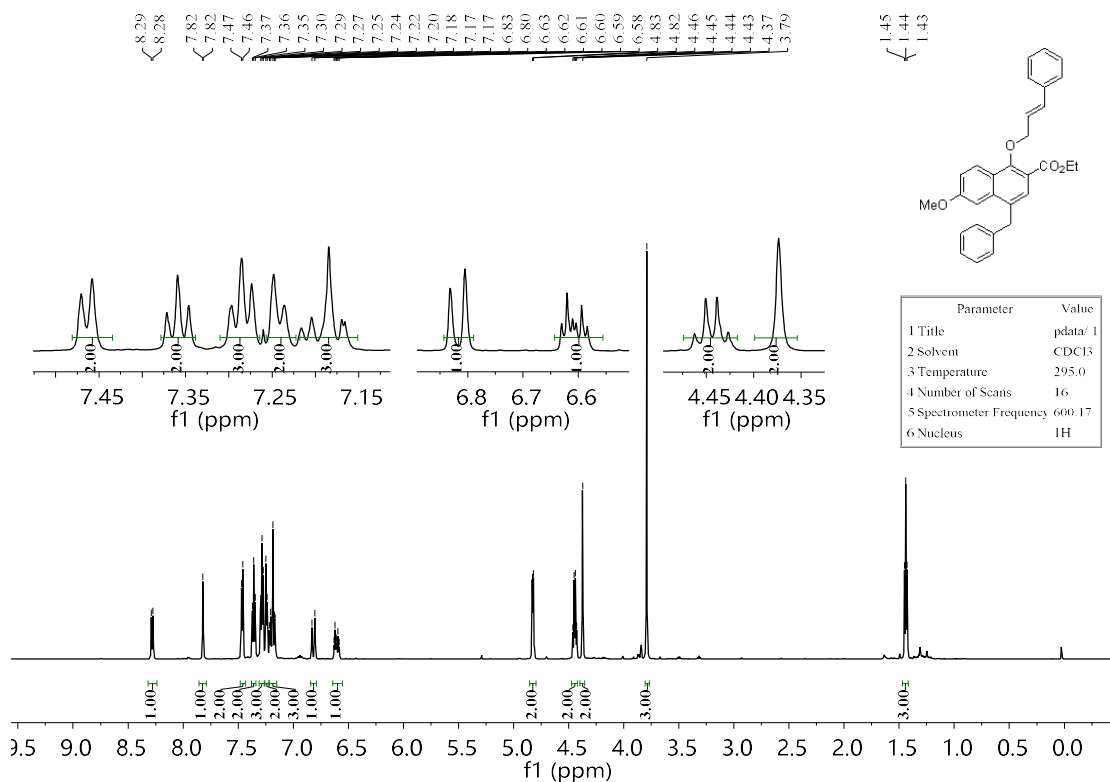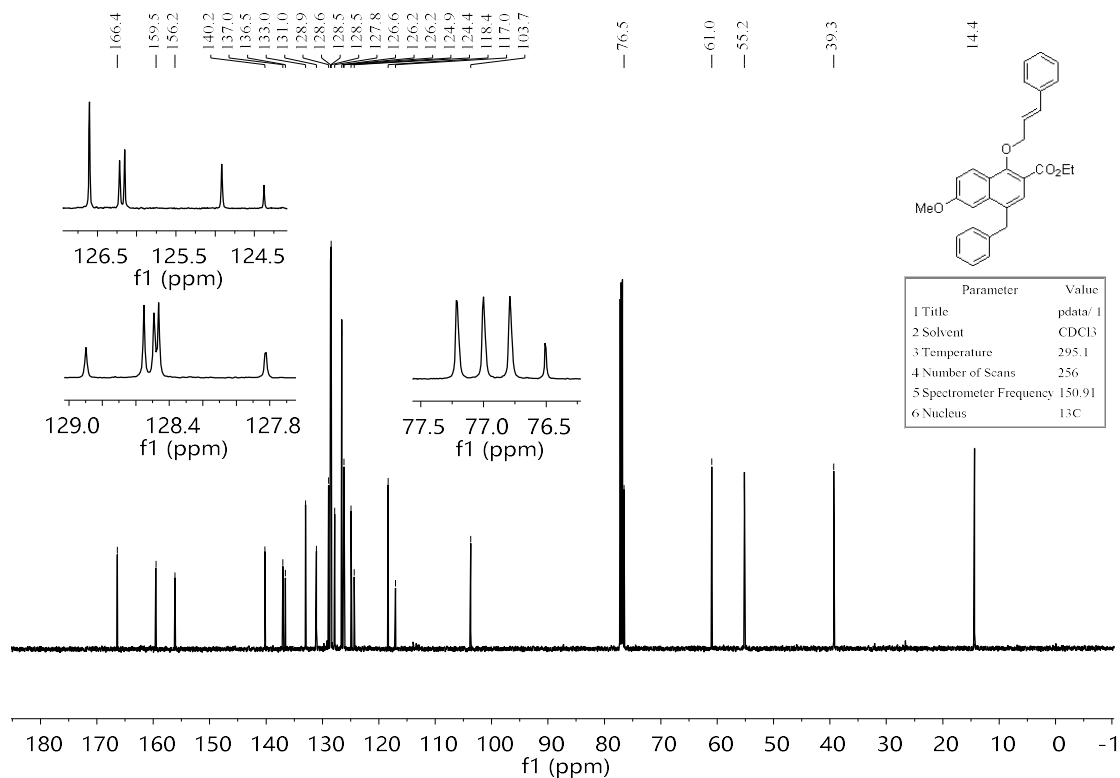

### Ethyl 4-benzyl-6-chloro-1-(cinnamyloxy)-2-naphthoate (A17)

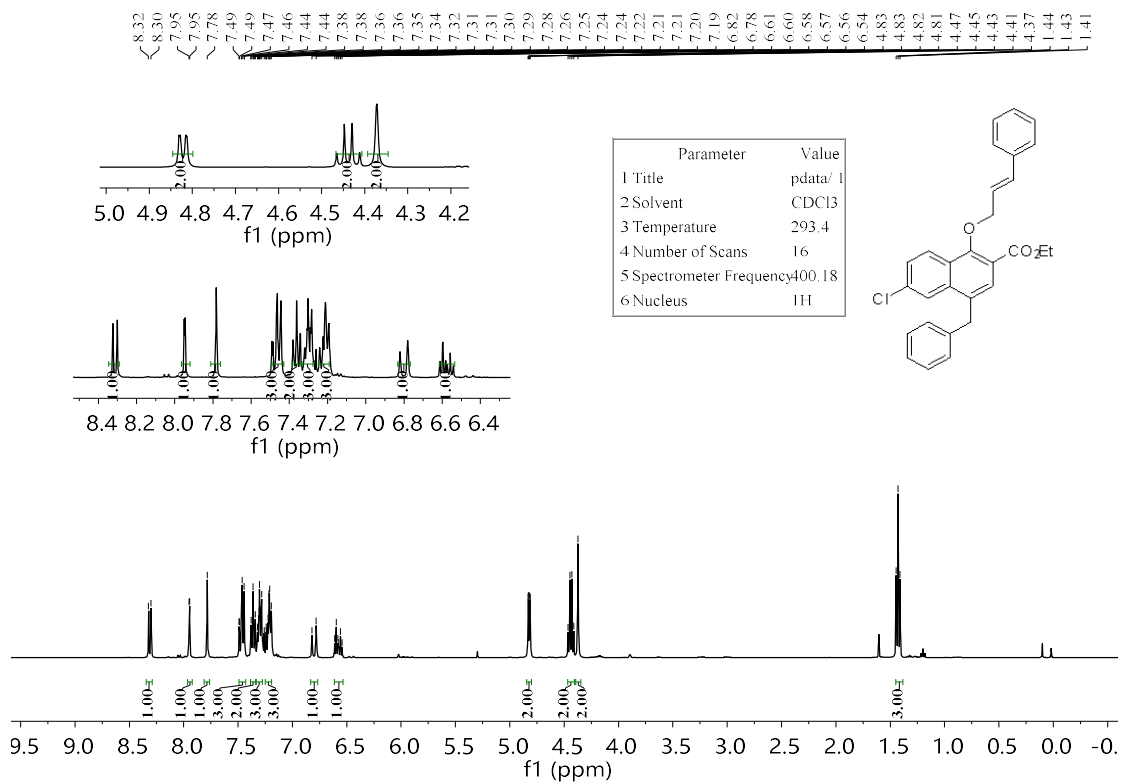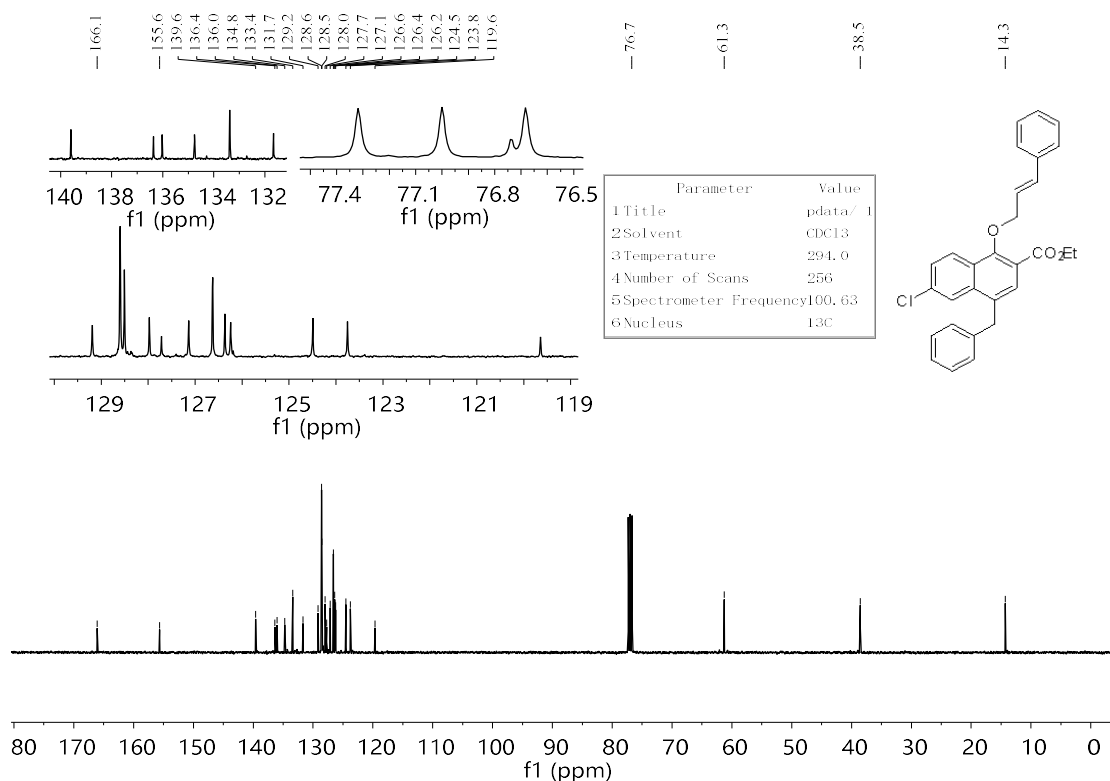

# Ethyl 4-benzyl-1-(cinnamyloxy)-6-cyano-2-naphthoate (A18)

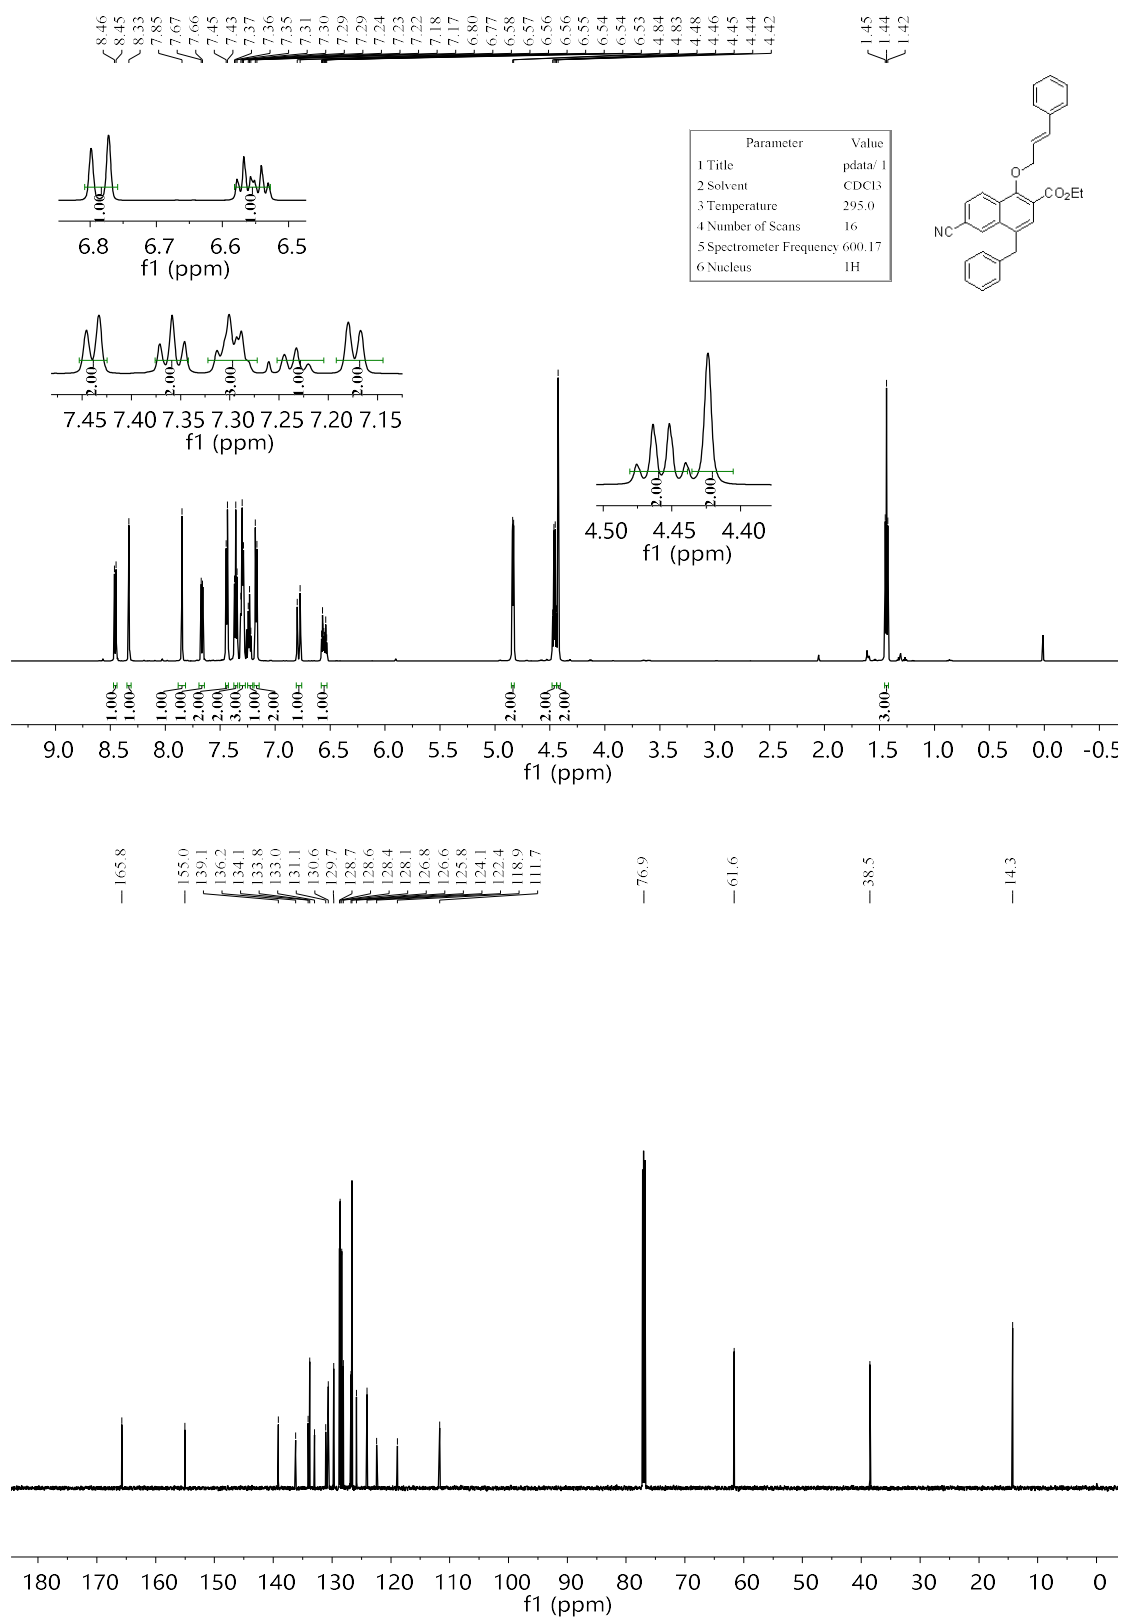

### Ethyl 4-benzyl-1-(cinnamyloxy)-8-methyl-2-naphthoate (A19)

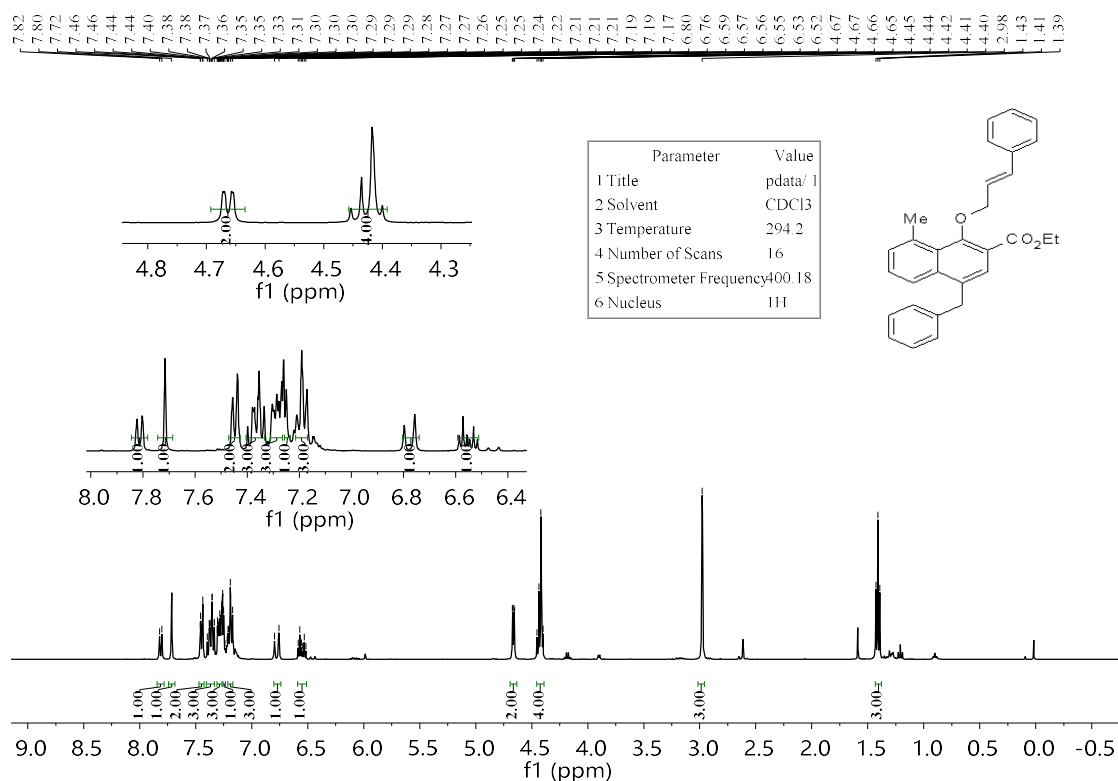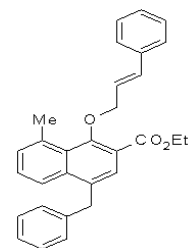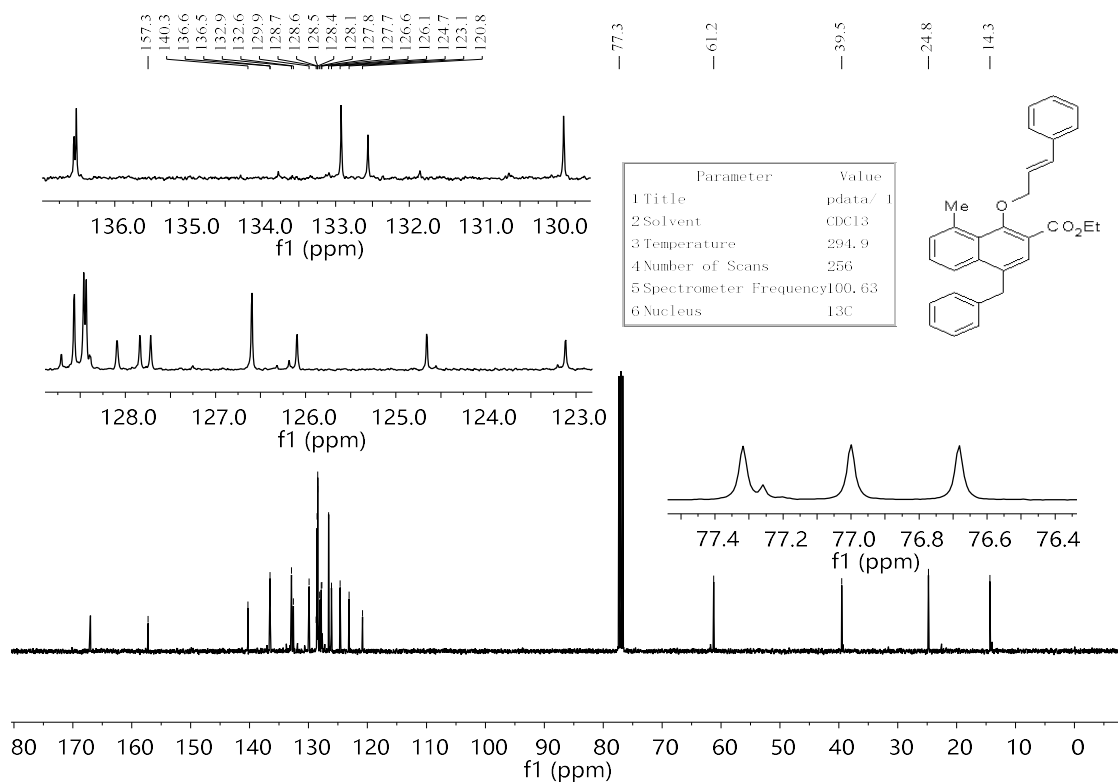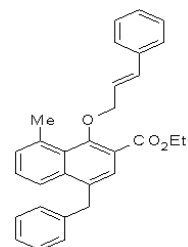

**Ethyl (E)-1-((3-(4-nitrophenyl)allyl)oxy)-4-(3-phenylprop-2-yn-1-yl)-2-naphthoate (A20)**

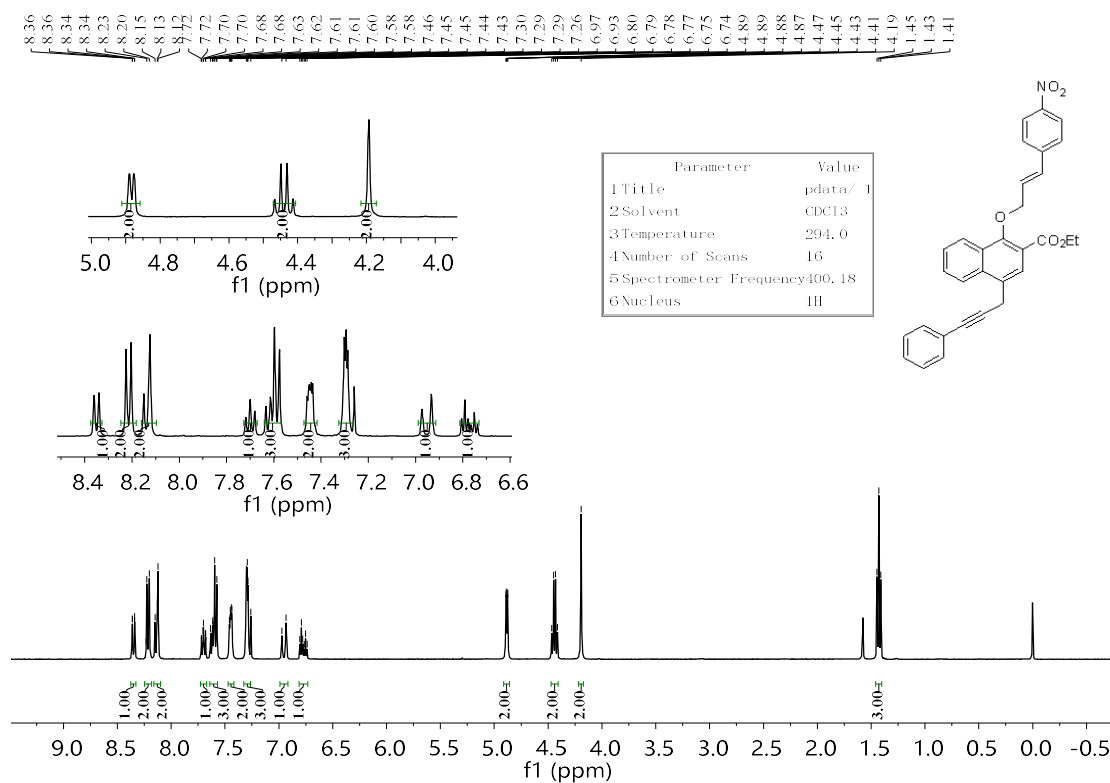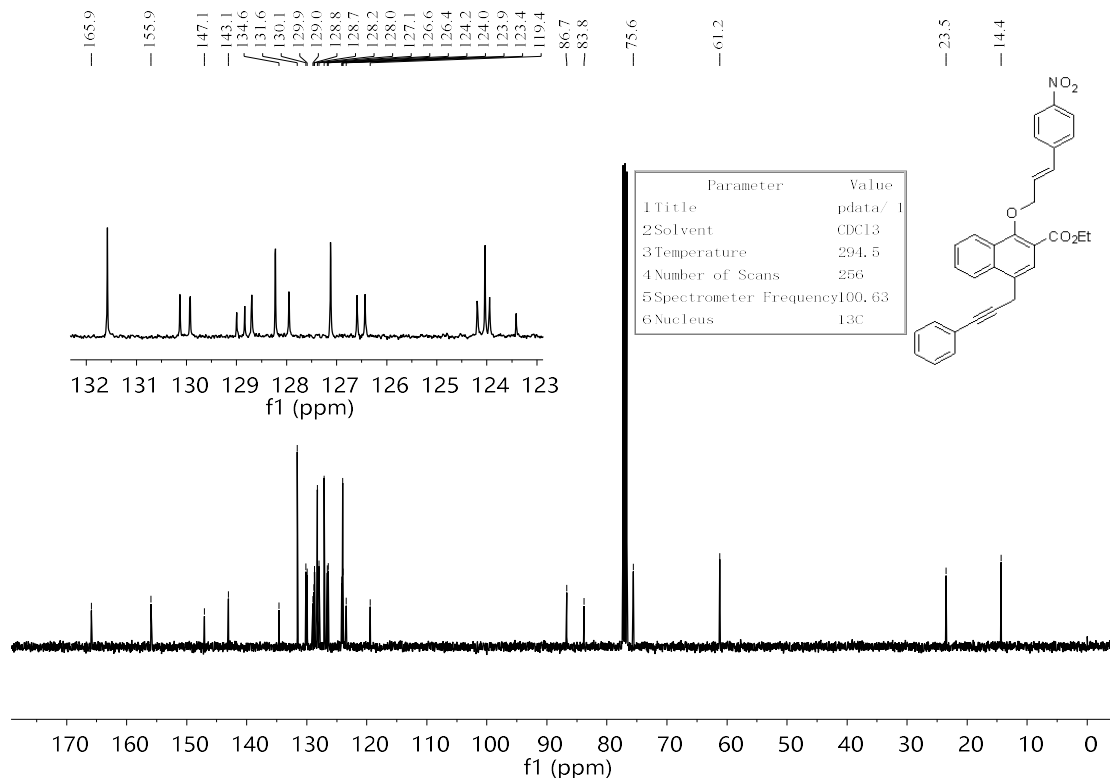

**Ethyl (E)-4-(3-phenylprop-2-yn-1-yl)-1-((3-(4-(trifluoromethyl)phenyl)allyloxy)-2-naphthoate**  
**(A21)**

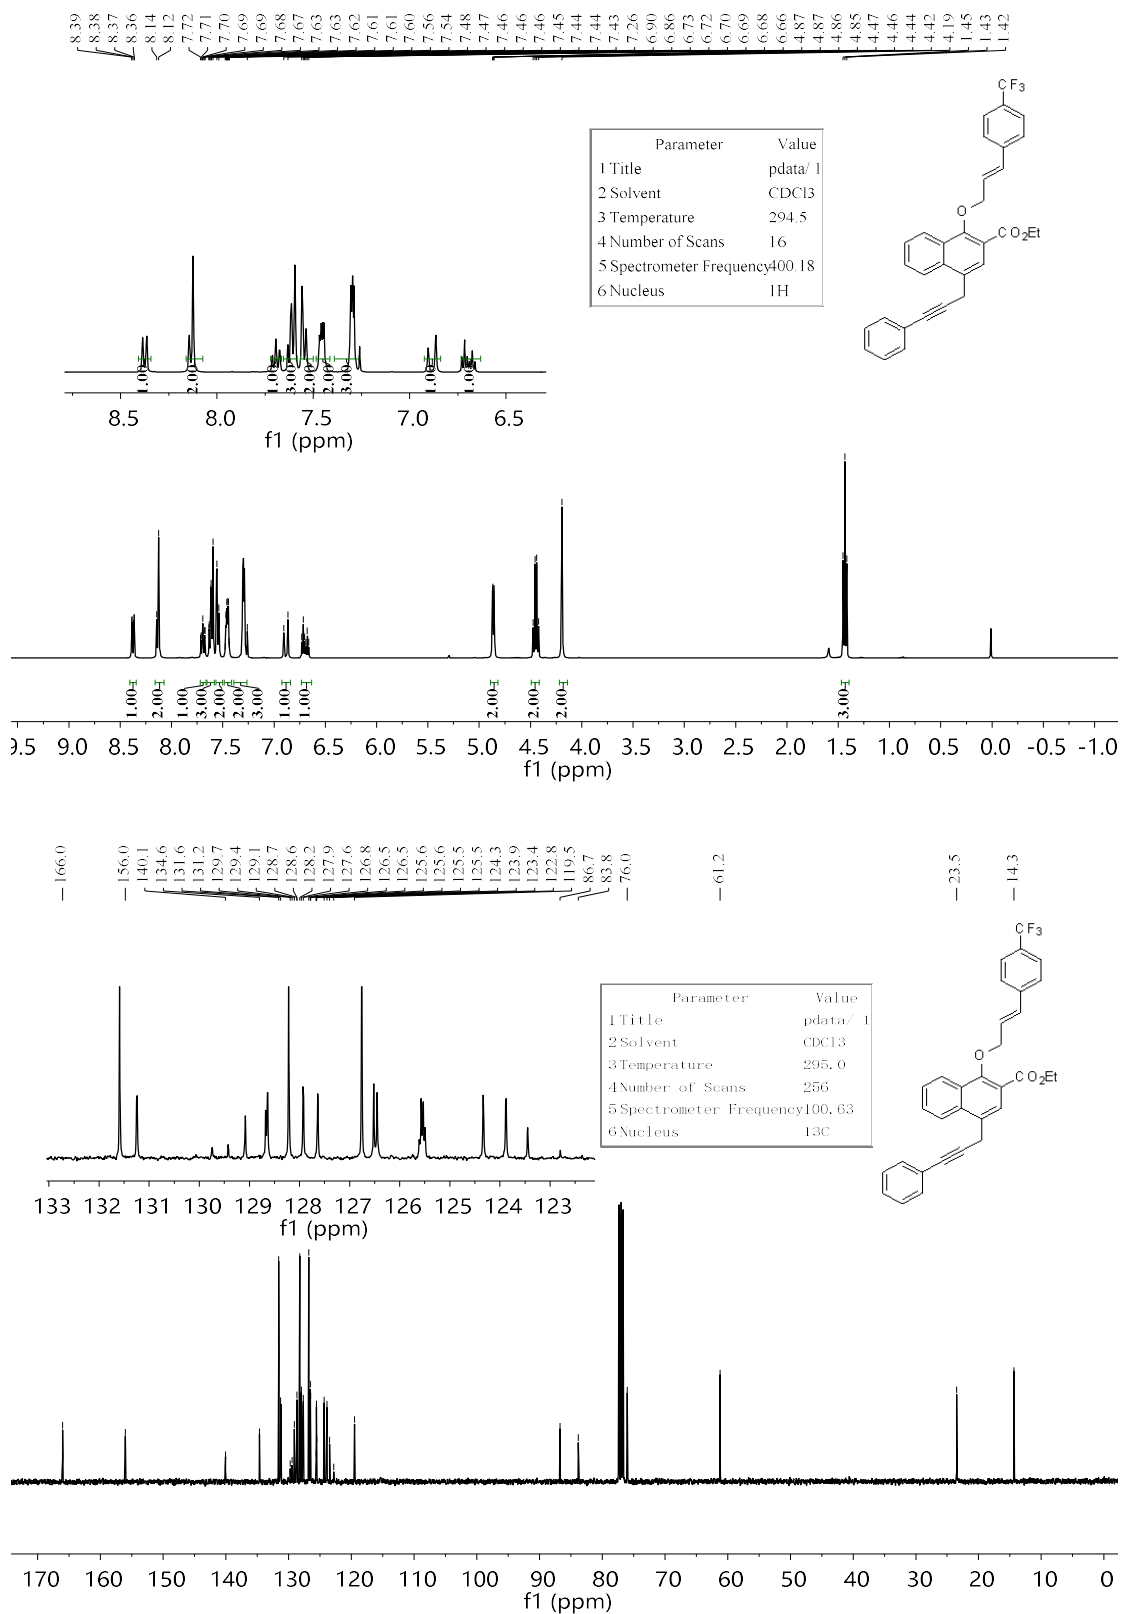

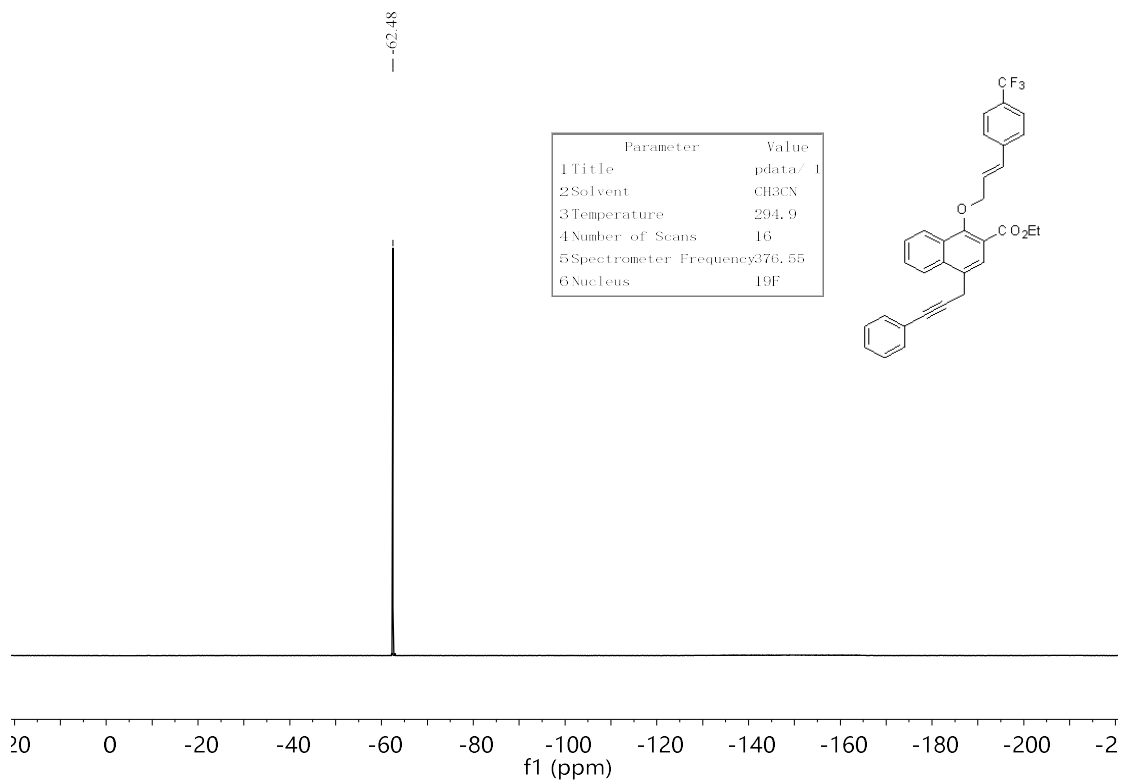



**Ethyl (E)-1-((3-(4-fluorophenyl)allyl)oxy)-4-(3-phenylprop-2-yn-1-yl)-2-naphthoate (A22)**

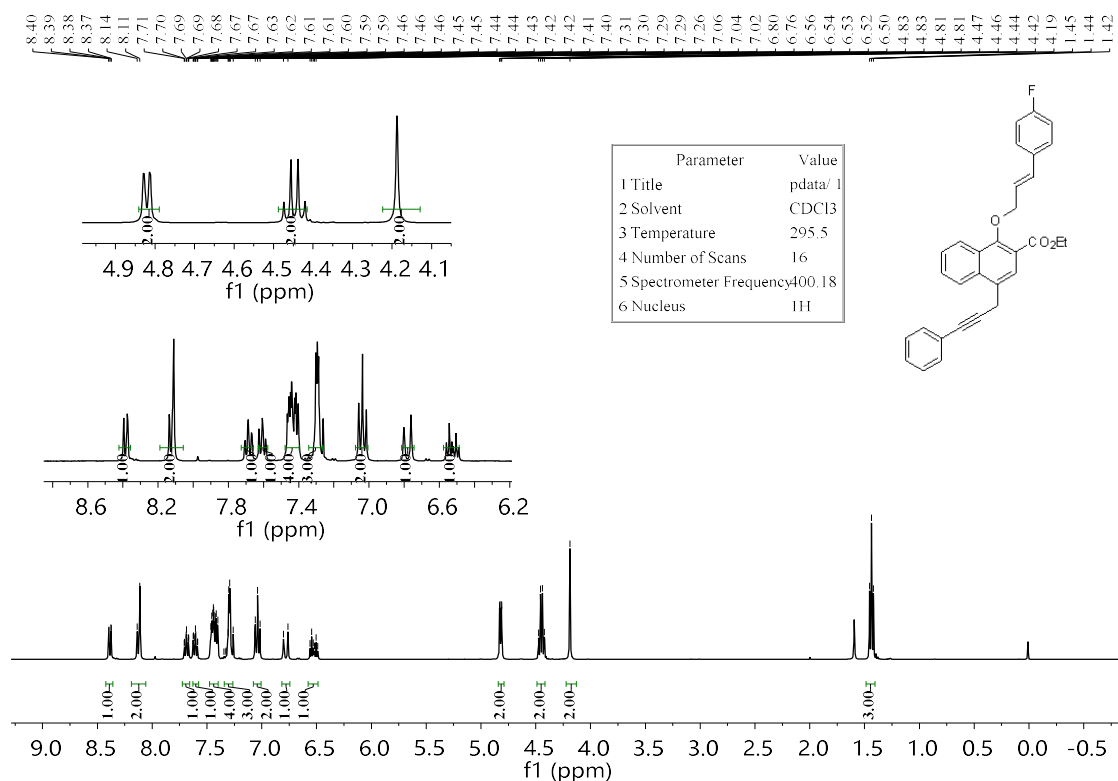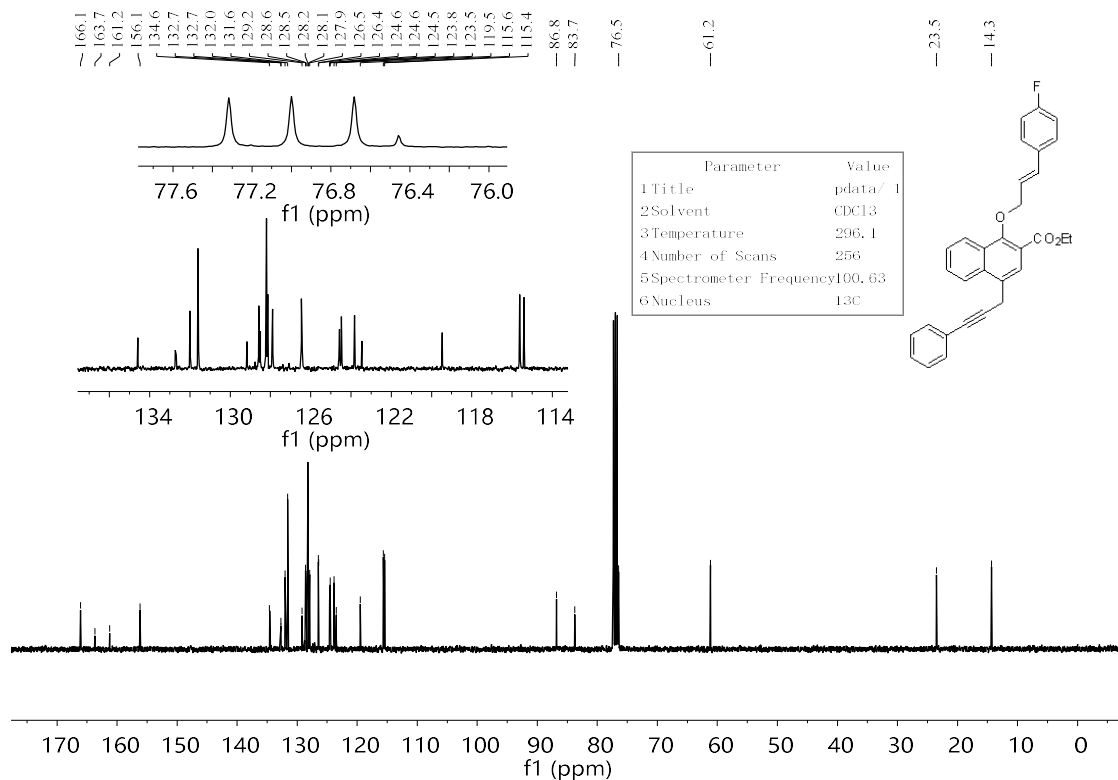

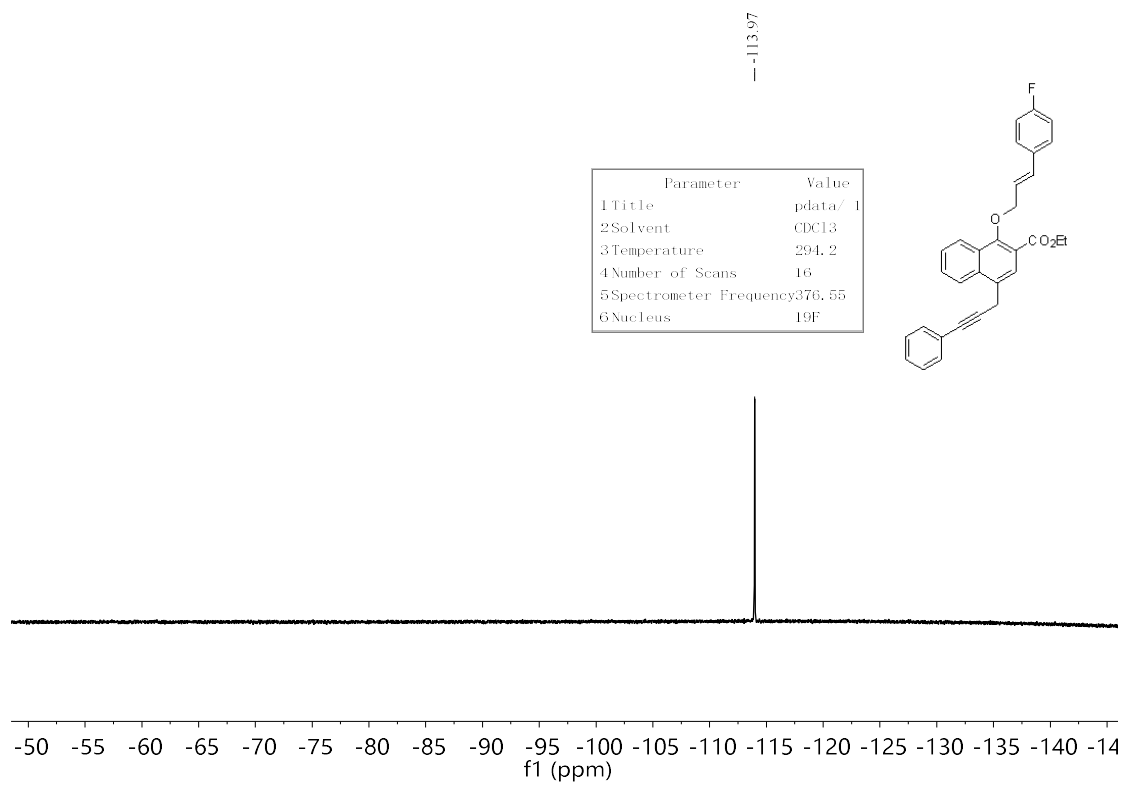

**Ethyl (E)-1-((3-(4-bromophenyl)allyl)oxy)-4-(3-phenylprop-2-yn-1-yl)-2-naphthoate (A23)**

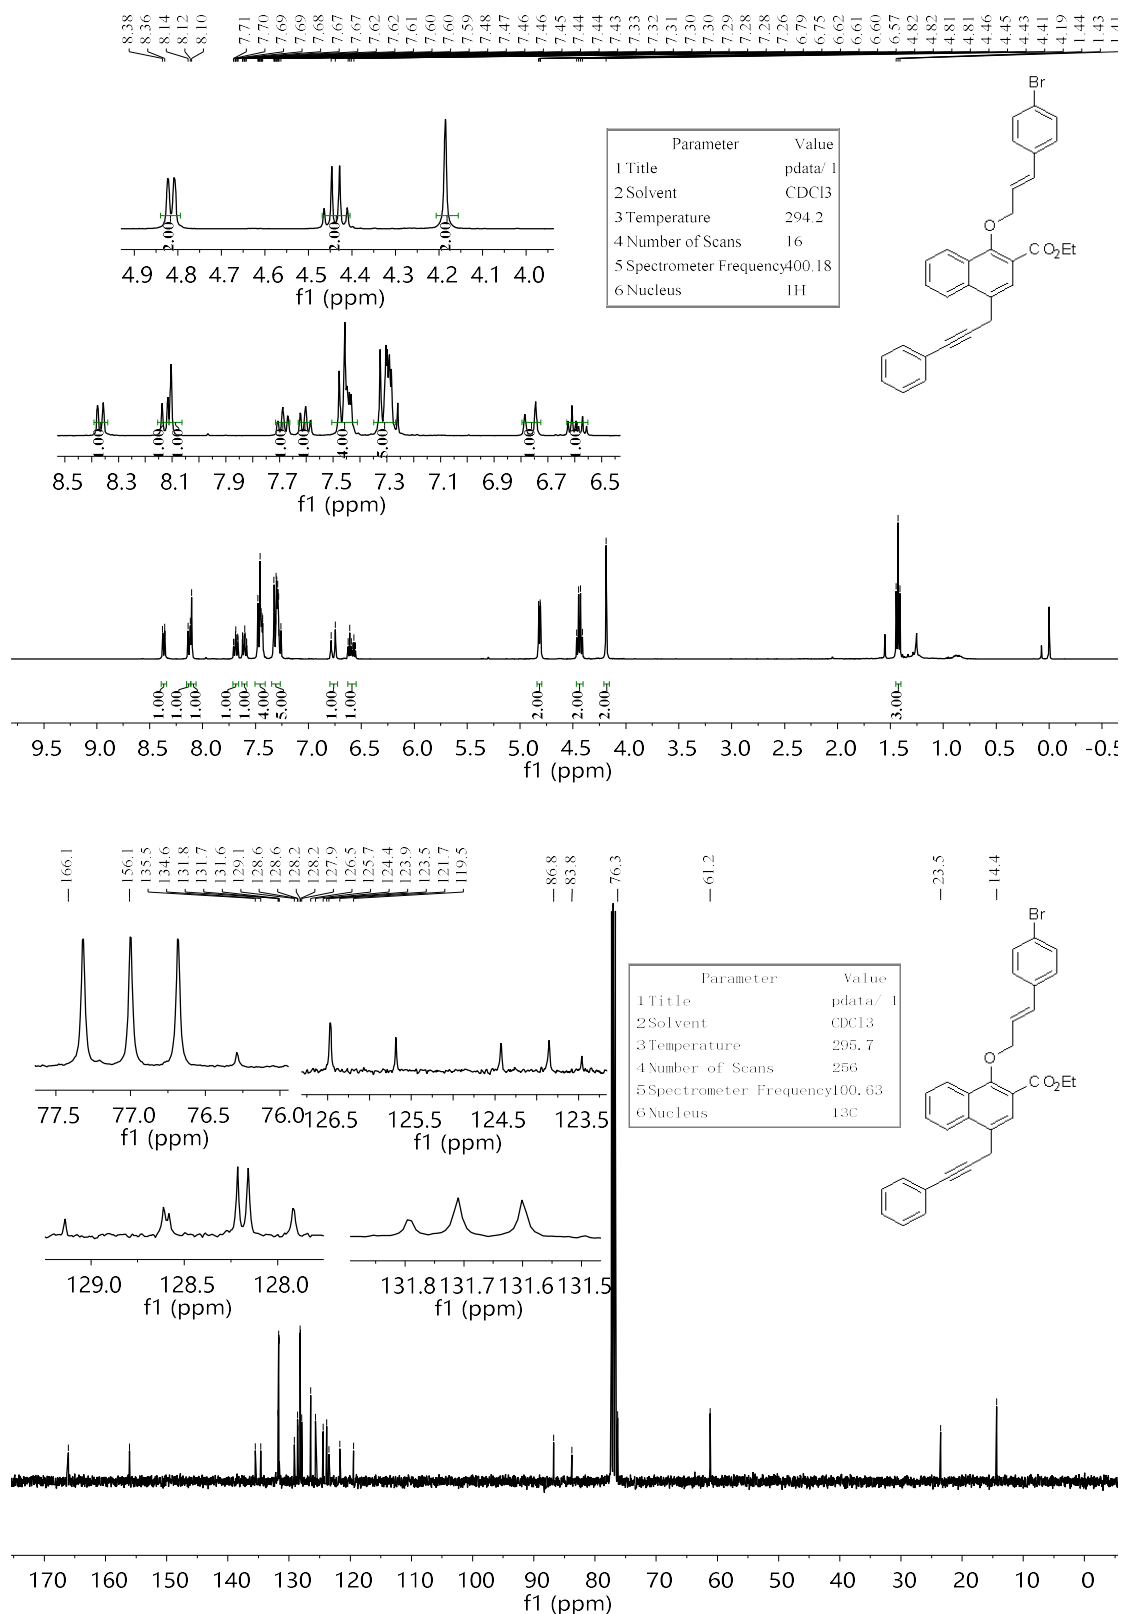

**Ethyl (E)-1-((3-(4-chlorophenyl)allyl)oxy)-4-(3-phenylprop-2-yn-1-yl)-2-naphthoate (A24)**

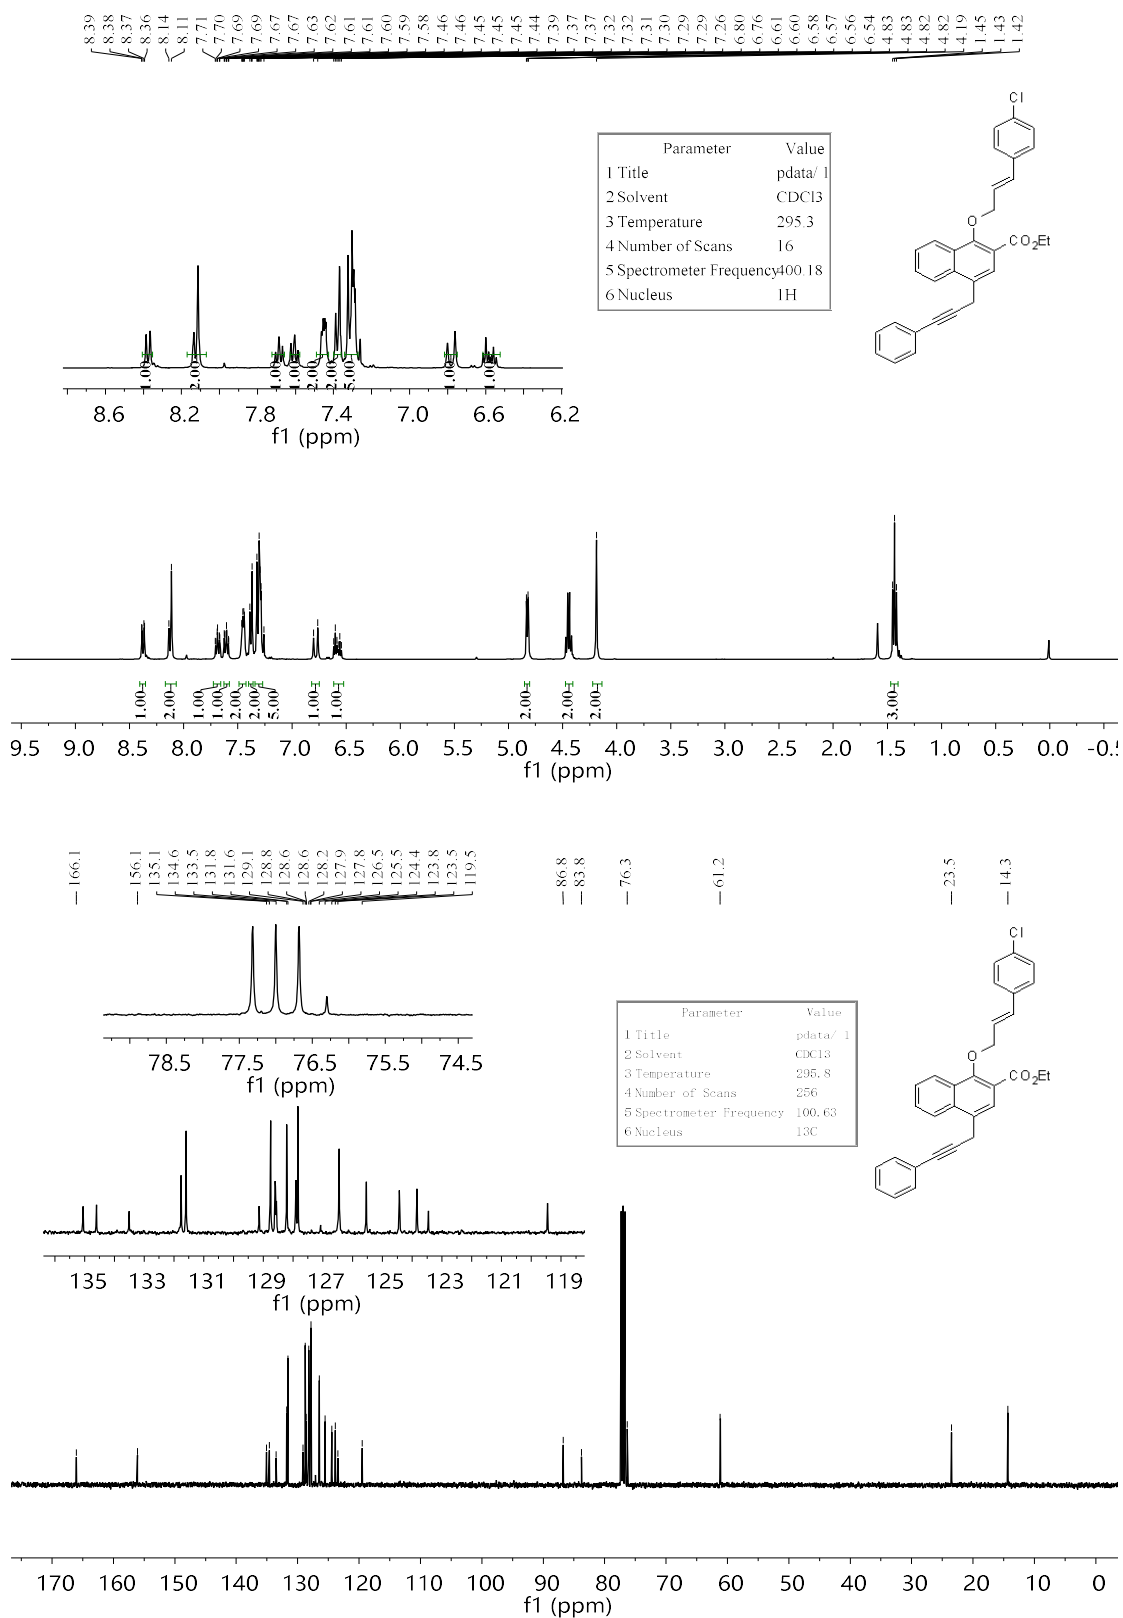

### Ethyl (E)-4-(3-phenylprop-2-yn-1-yl)-1-((3-(p-tolyl)allyl)oxy)-2-naphthoate (A25)

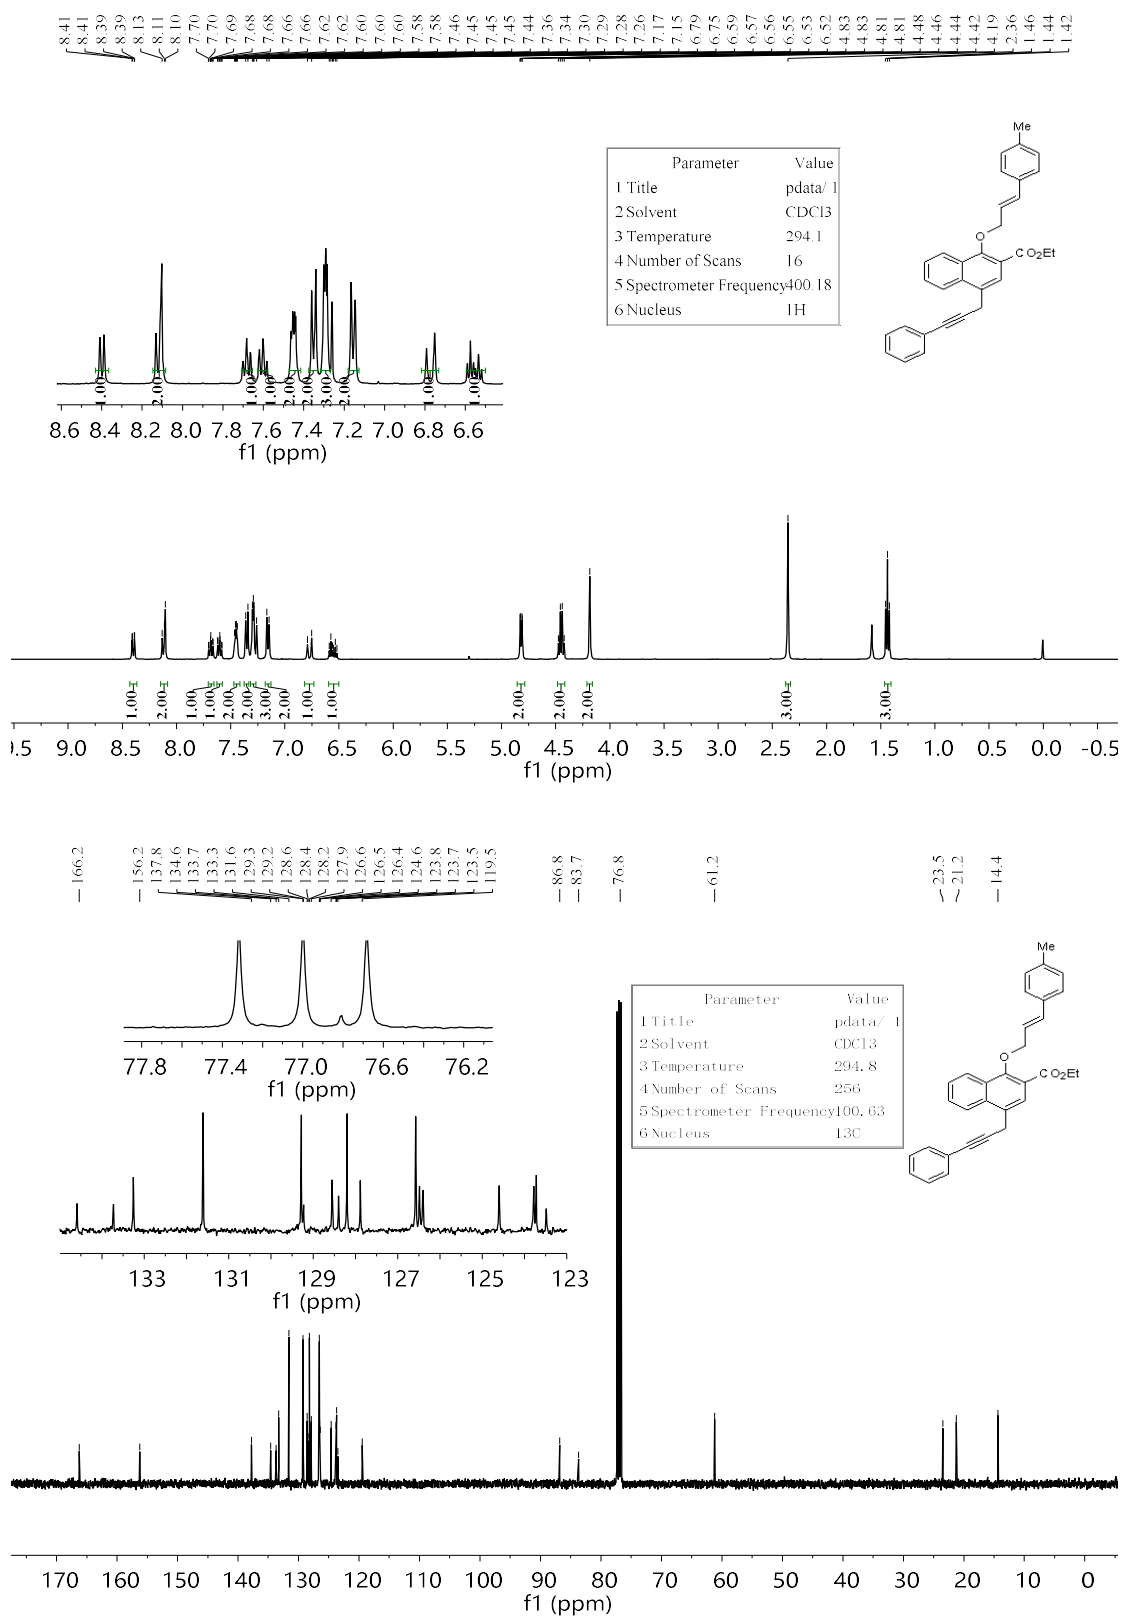

**Ethyl (E)-1-((3-(4-methoxyphenyl)allyl)oxy)-4-(3-phenylprop-2-yn-1-yl)-2-naphthoate (A26)**

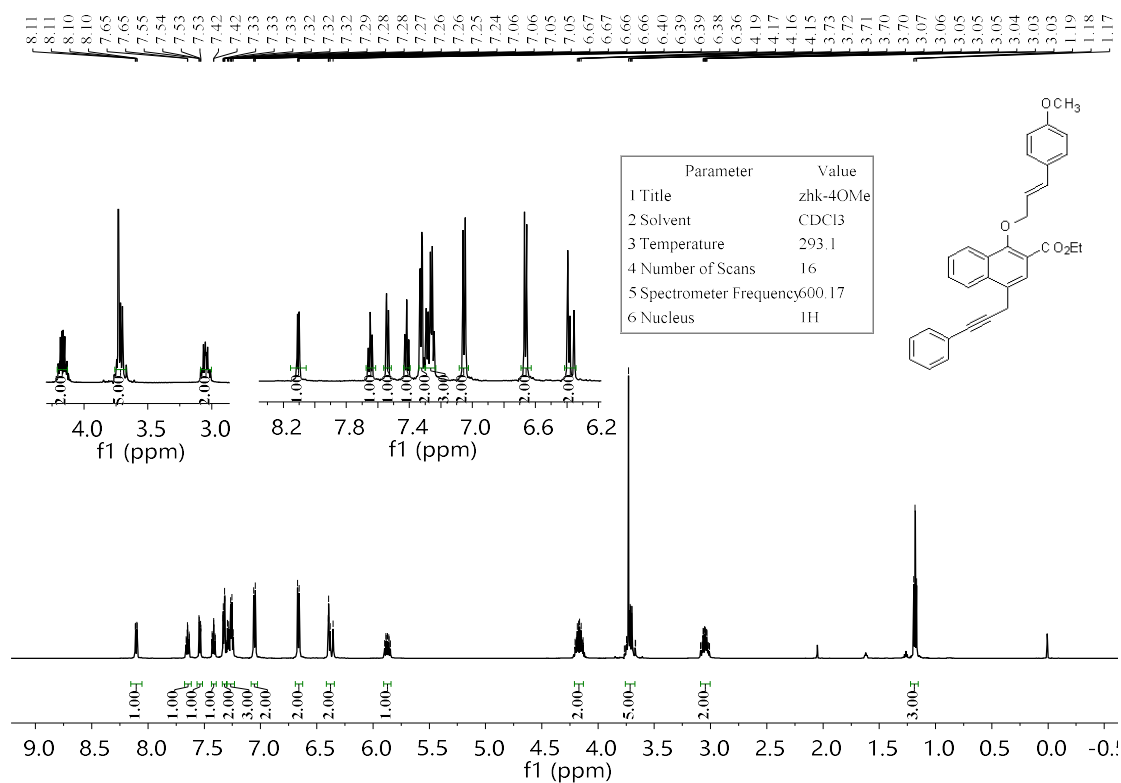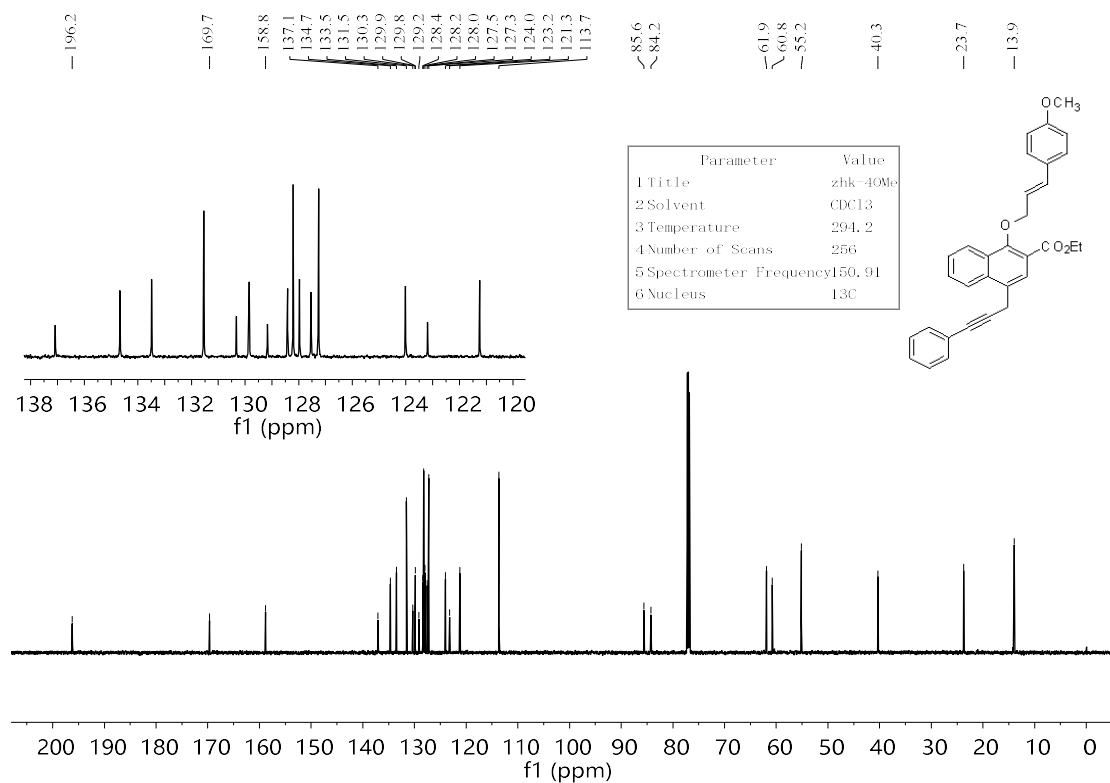

**Ethyl (E)-1-((3-(3-chlorophenyl)allyl)oxy)-4-(3-phenylprop-2-yn-1-yl)-2-naphthoate (A27)**

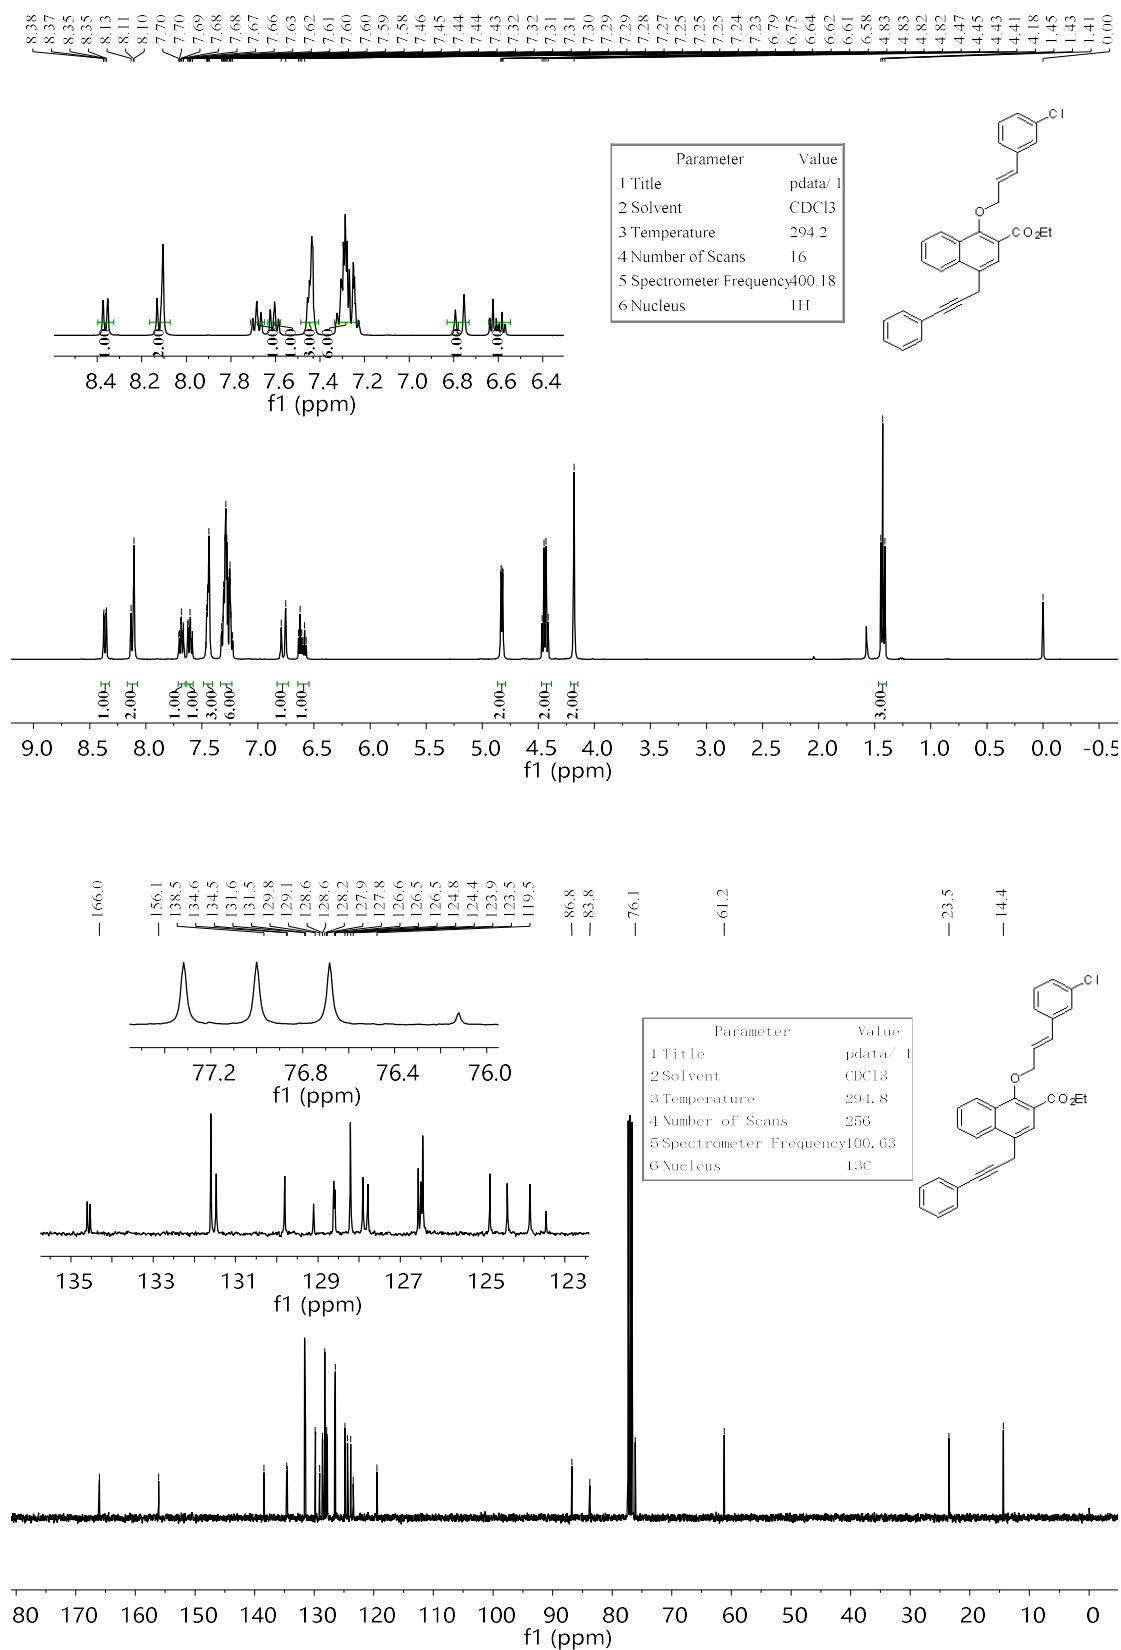

**Ethyl (E)-4-(3-phenylprop-2-yn-1-yl)-1-((3-(m-tolyl)allyl)oxy)-2-naphthoate (A28)**

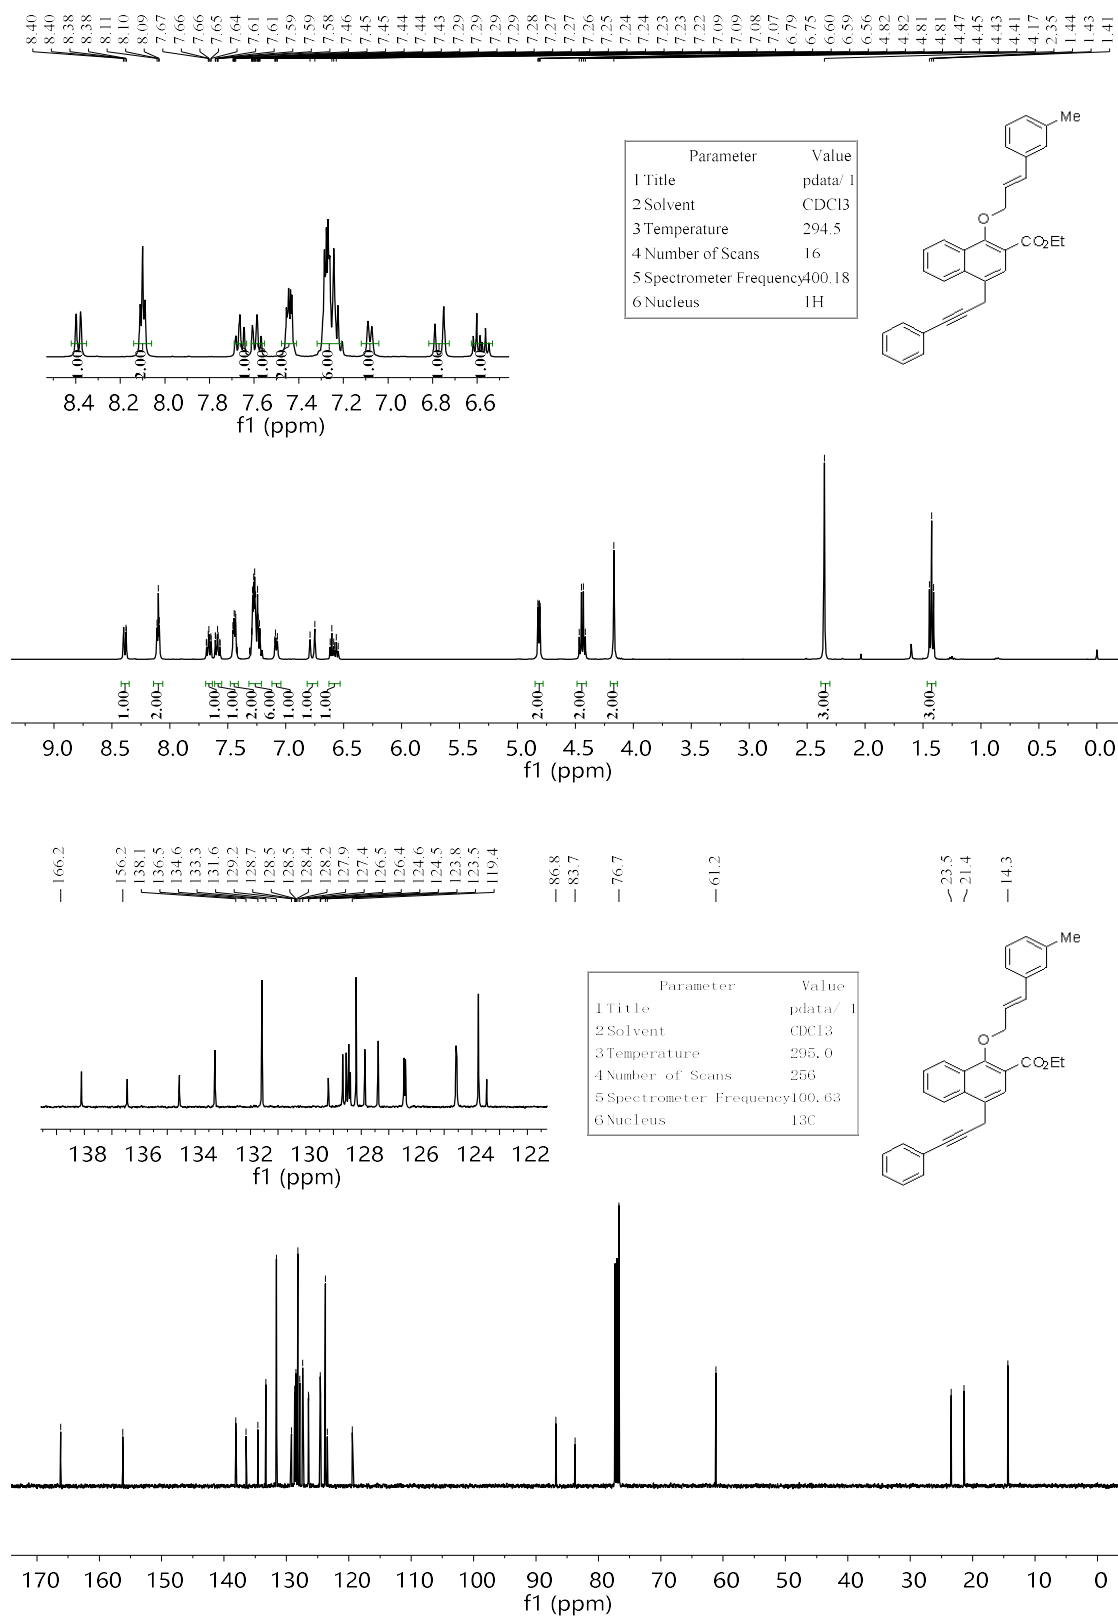



**Ethyl (E)-1-((3-(2-chlorophenyl)allyl)oxy)-4-(3-phenylprop-2-yn-1-yl)-2-naphthoate (A29)**

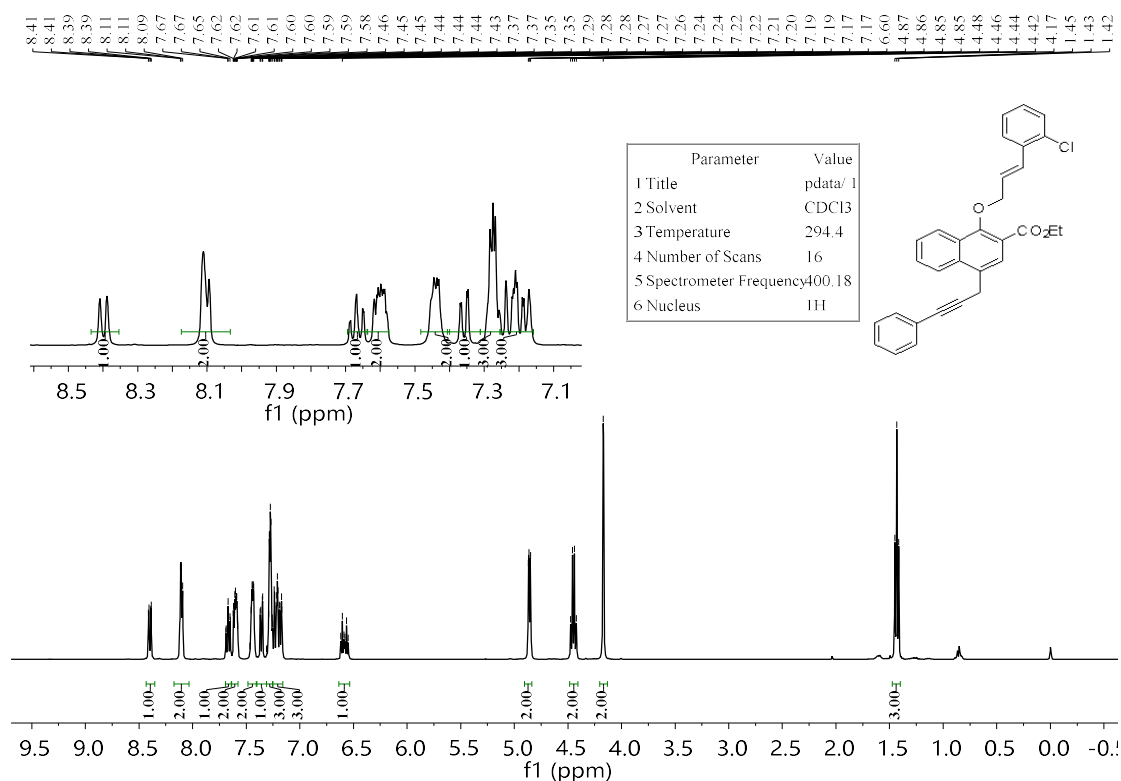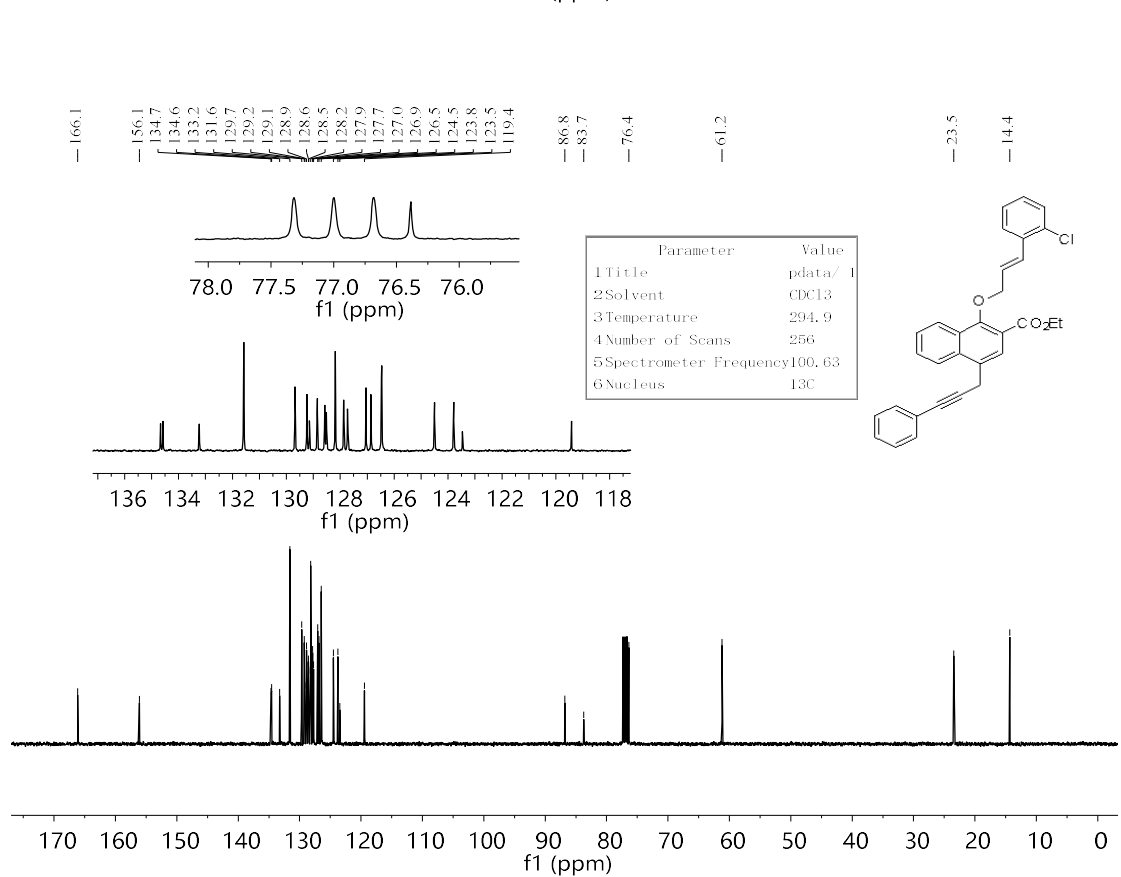

**Ethyl (E)-1-((3-(2-methoxyphenyl)allyl)oxy)-4-(3-phenylprop-2-yn-1-yl)-2-naphthoate (A30)**

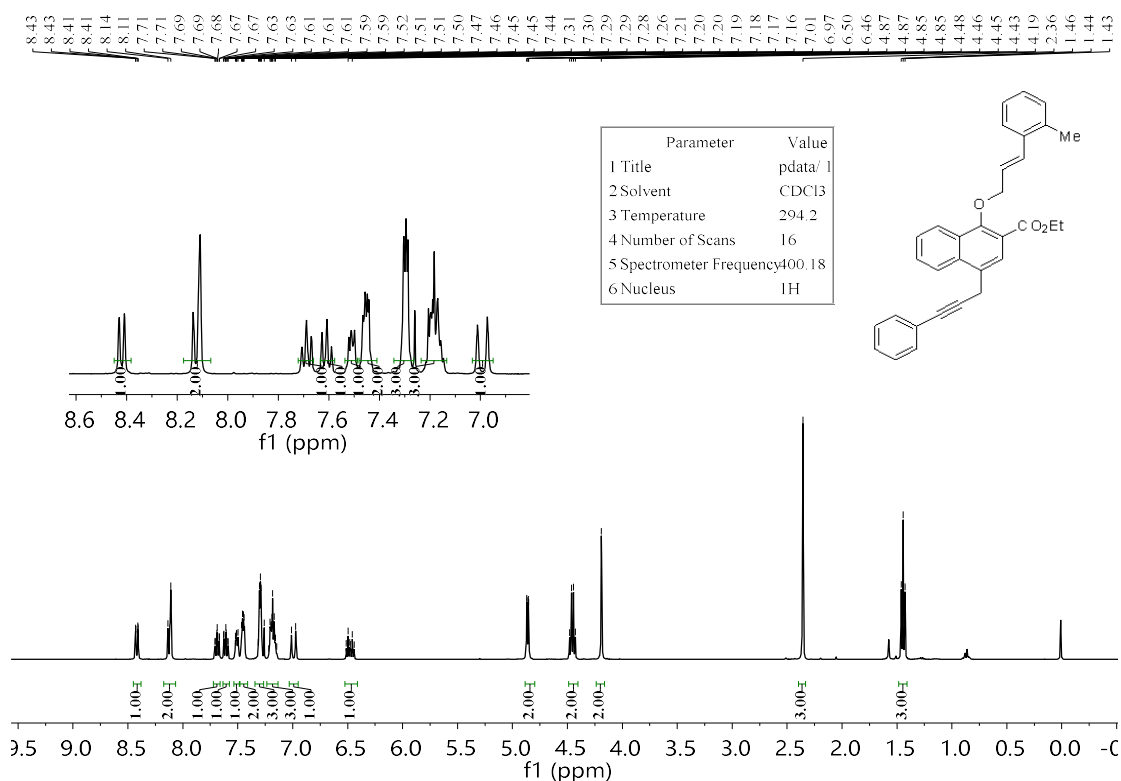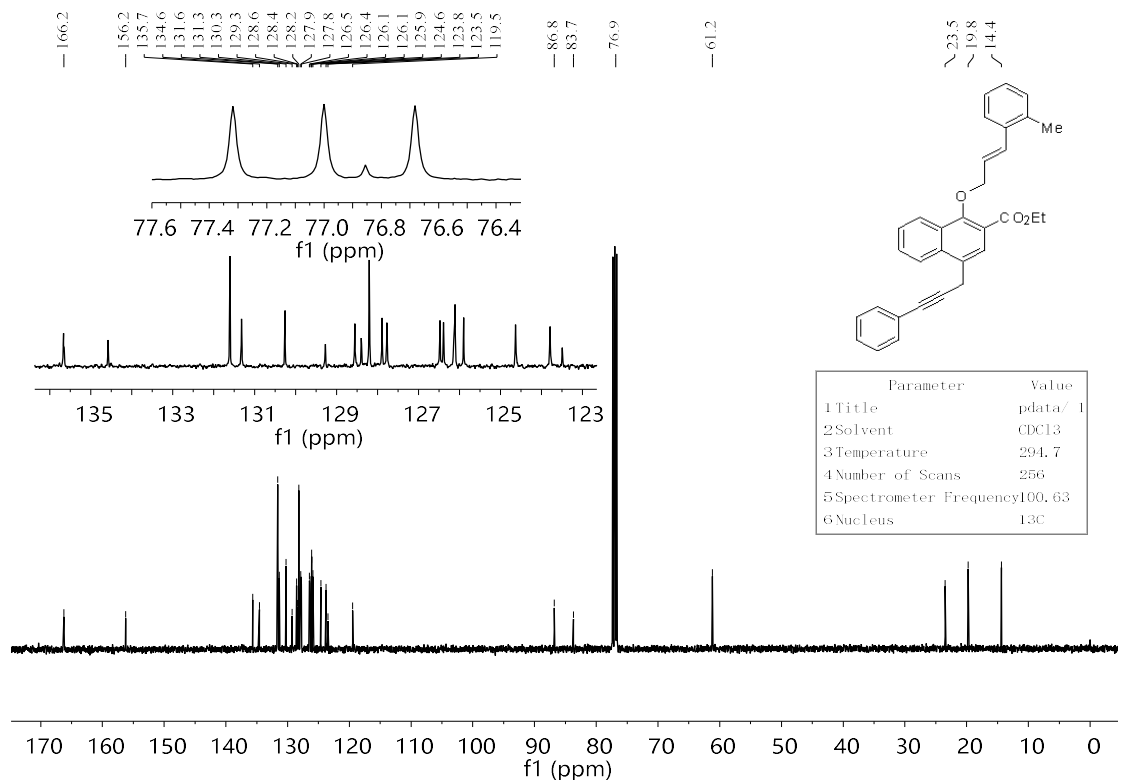

**Ethyl (E)-4-(3-phenylprop-2-yn-1-yl)-1-((3-(o-tolyl)allyl)oxy)-2-naphthoate (A31)**

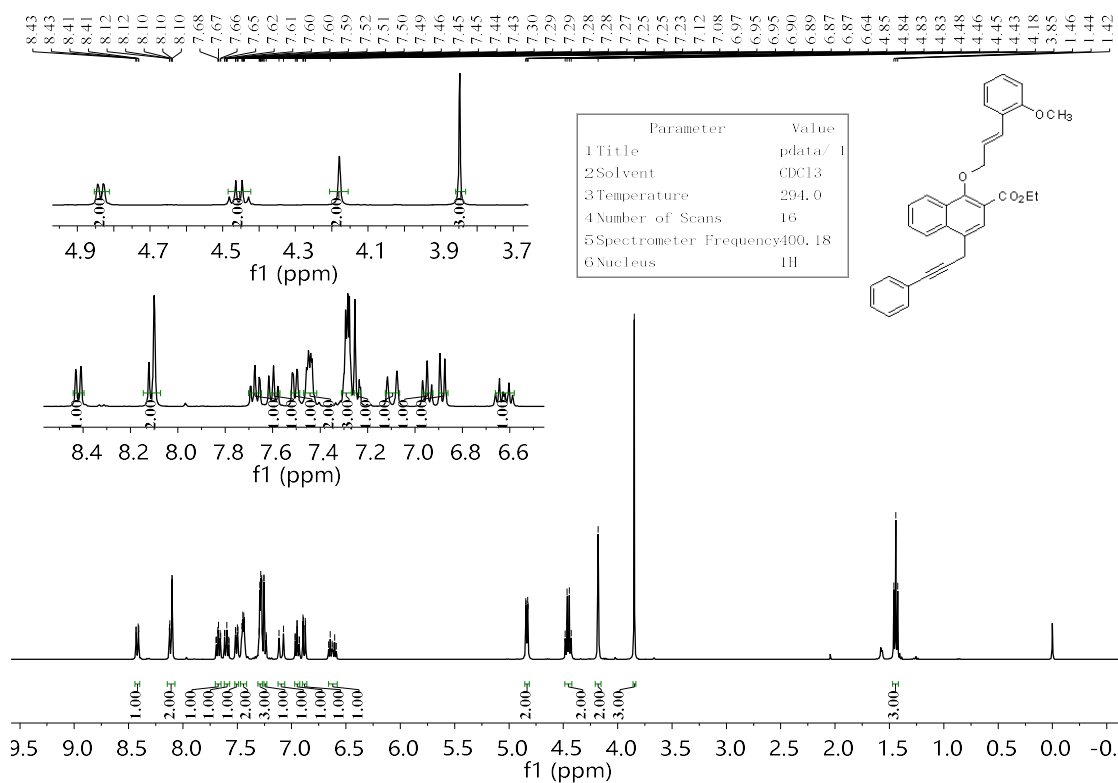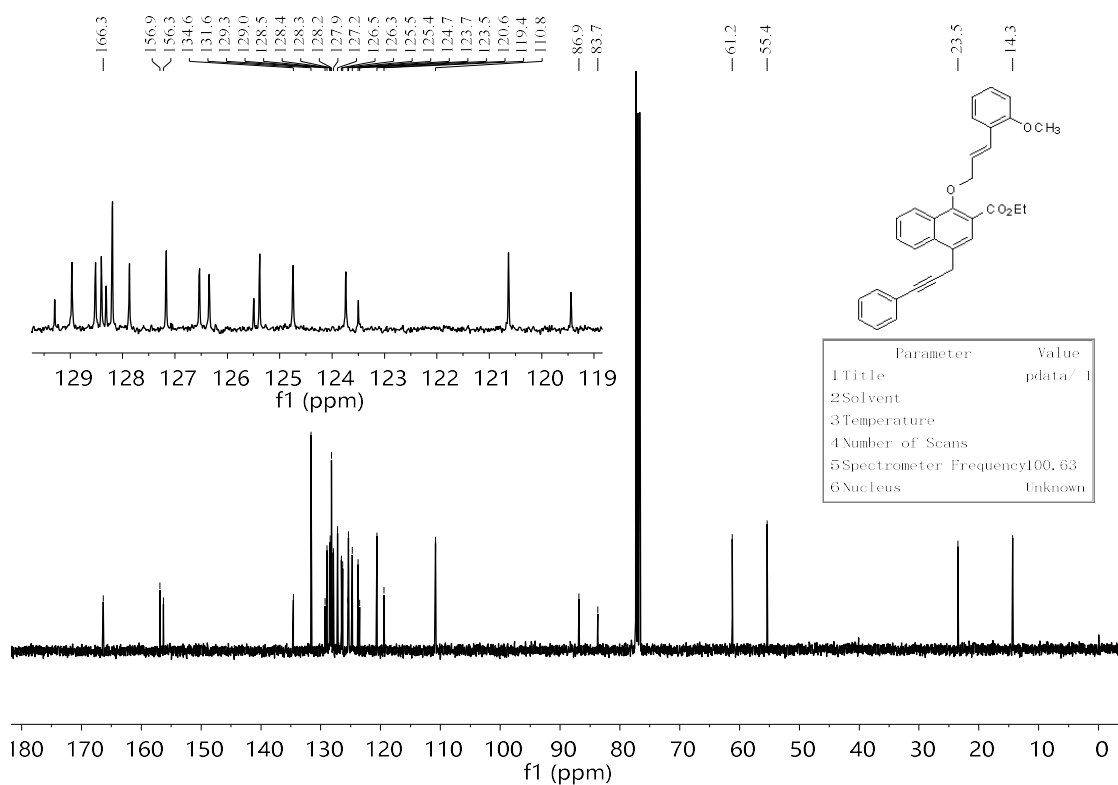

**Ethyl (E)-1-((3-(naphthalen-1-yl)allyl)oxy)-4-(3-phenylprop-2-yn-1-yl)-2-naphthoate (A32)**

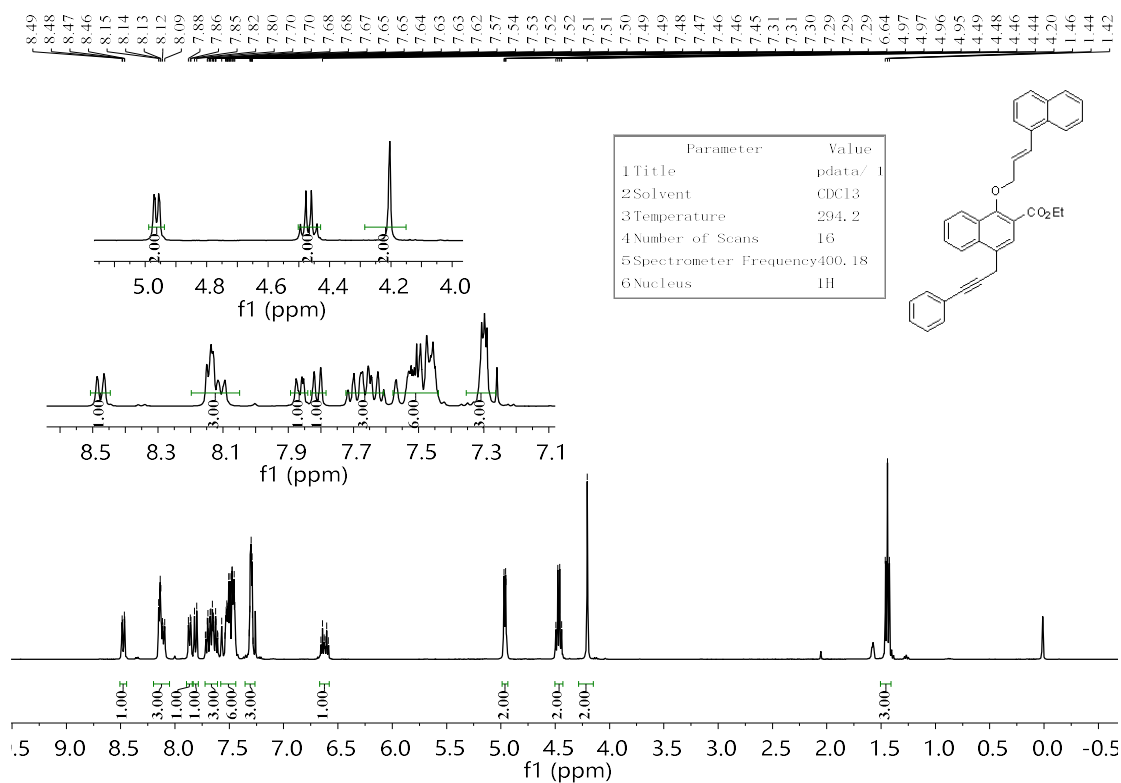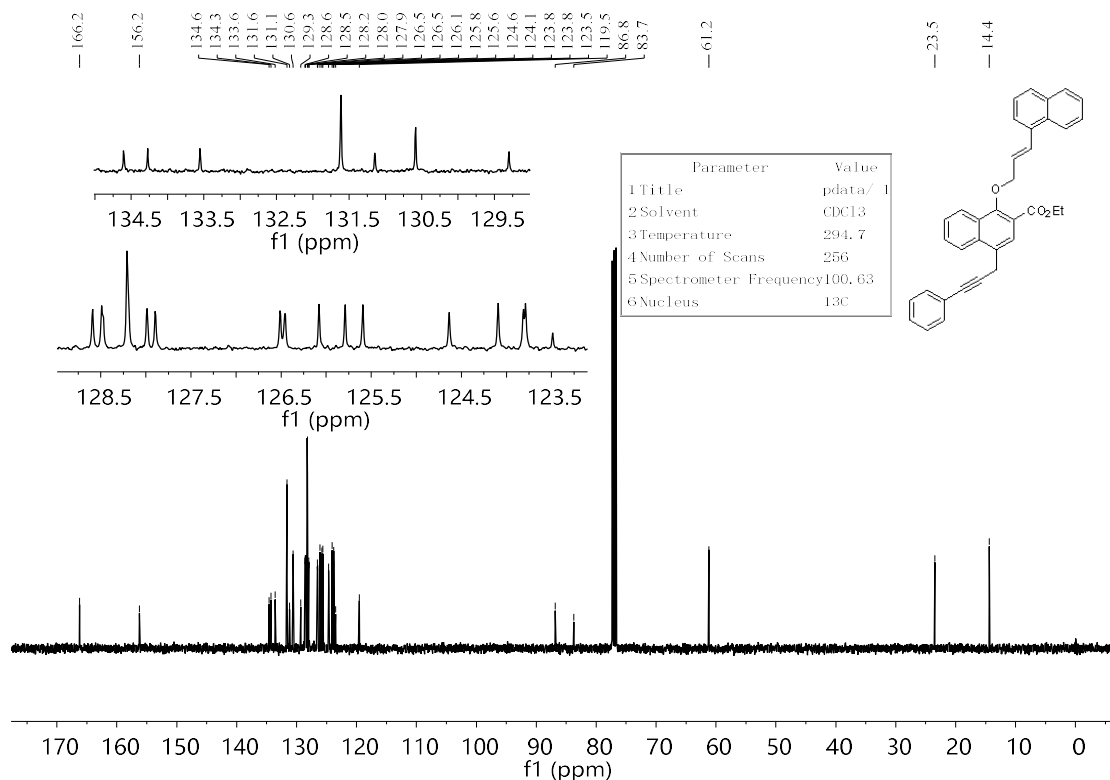

**Ethyl (E)-4-(3-phenylprop-2-yn-1-yl)-1-((3-(thiophen-2-yl)allyl)oxy)-2-naphthoate (A33)**

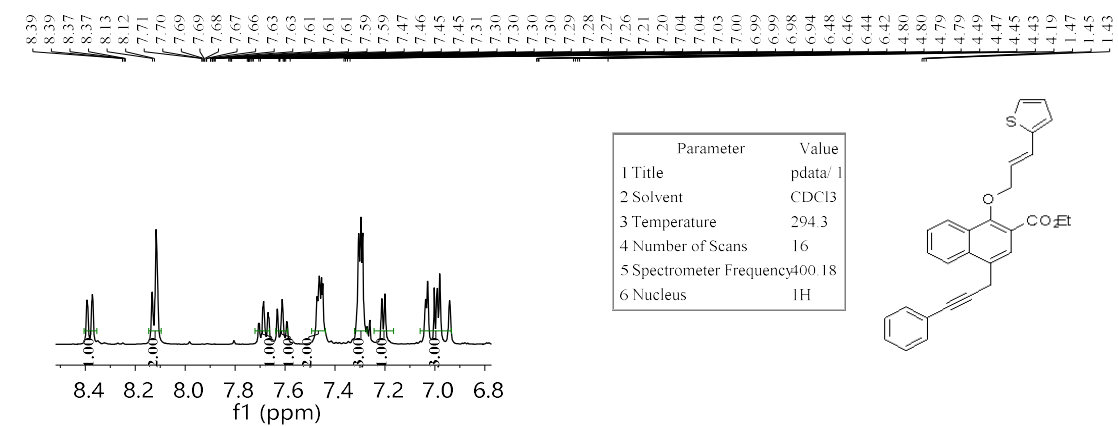

| Parameter                | Value    |
|--------------------------|----------|
| 1 Title                  | pdata/ 1 |
| 2 Solvent                | CDCl3    |
| 3 Temperature            | 294.3    |
| 4 Number of Scans        | 16       |
| 5 Spectrometer Frequency | 400.18   |
| 6 Nucleus                | 1H       |

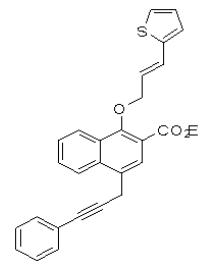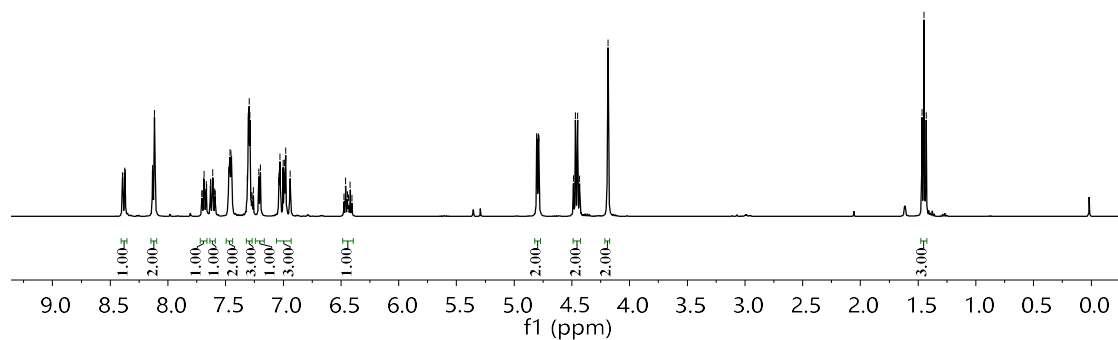

| Parameter                | Value    |
|--------------------------|----------|
| 1 Title                  | pdata/ 1 |
| 2 Solvent                | CDCl3    |
| 3 Temperature            | 294.8    |
| 4 Number of Scans        | 256      |
| 5 Spectrometer Frequency | 100.63   |
| 6 Nucleus                | 13C      |

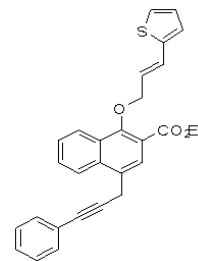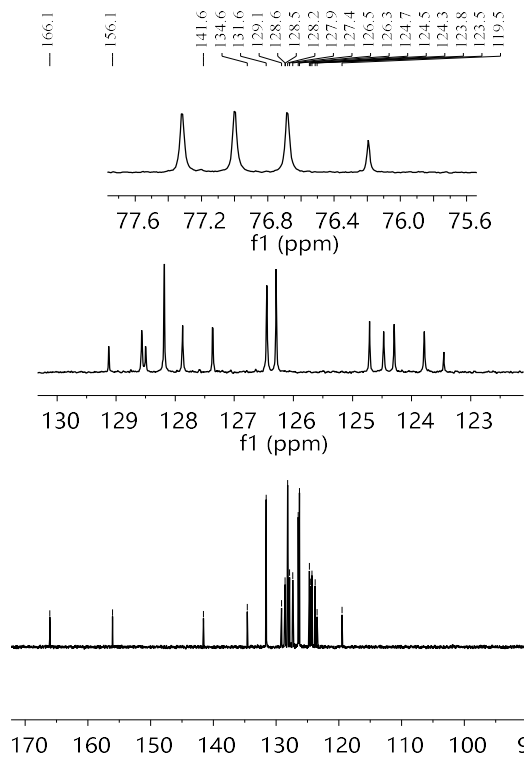

**Ethyl (E)-1-((4-ethoxy-4-oxobut-2-en-1-yl)oxy)-4-(3-phenylprop-2-yn-1-yl)-2-naphthoate (A34)**

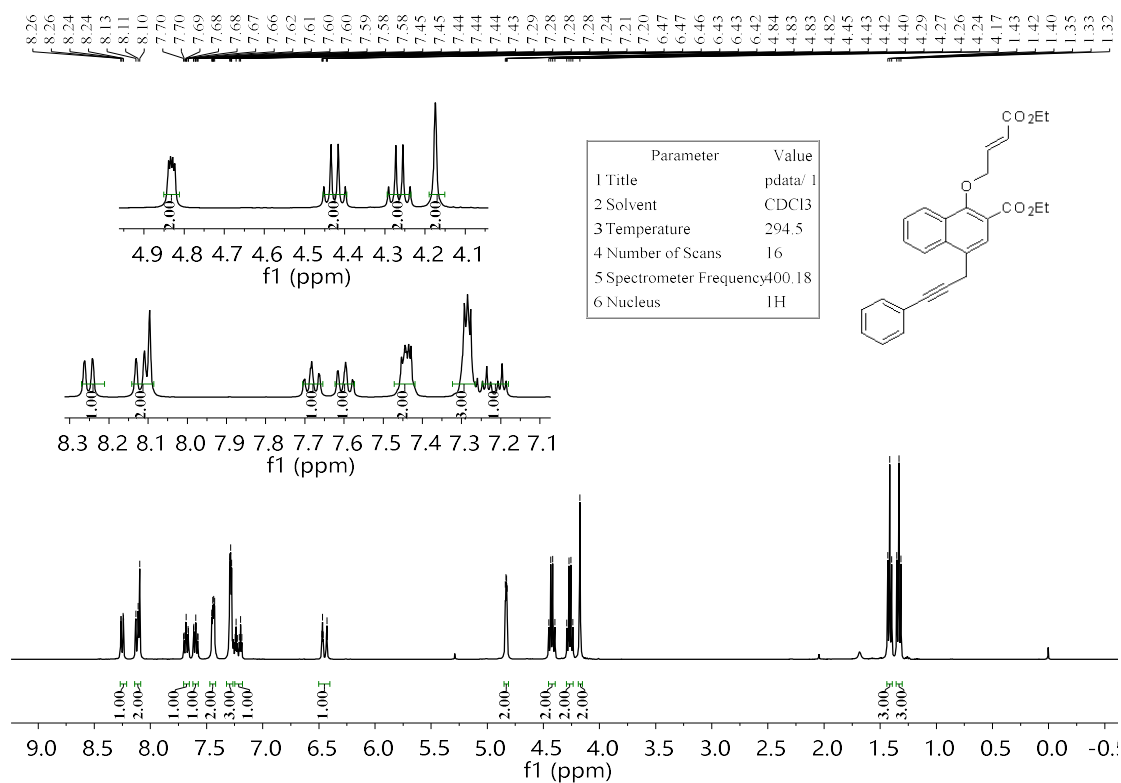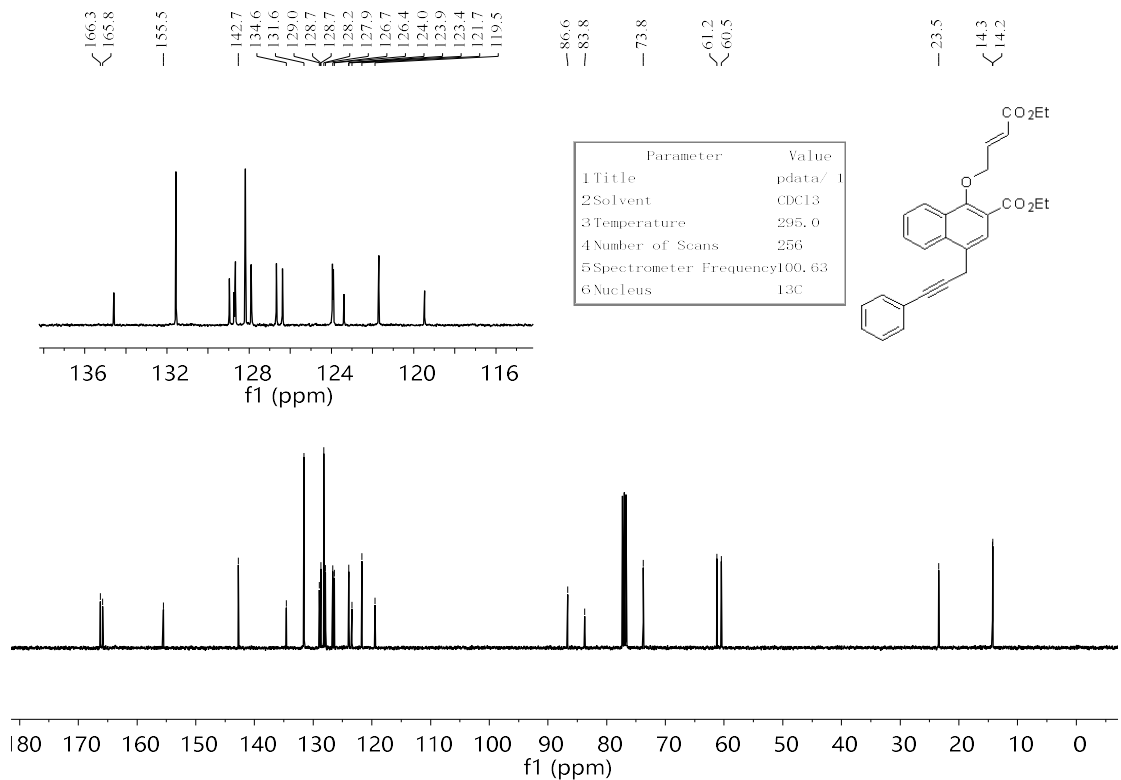

**Ethyl (E)-1-(but-2-en-1-yloxy)-4-(3-phenylprop-2-yn-1-yl)-2-naphthoate (A35)**

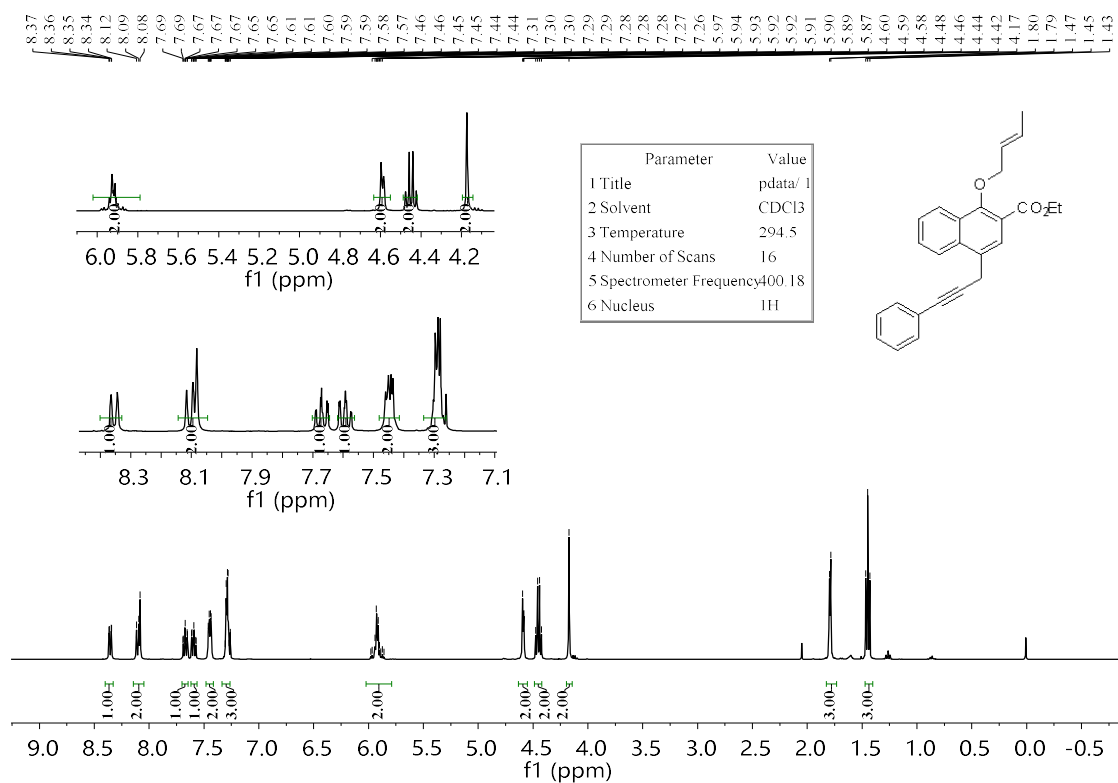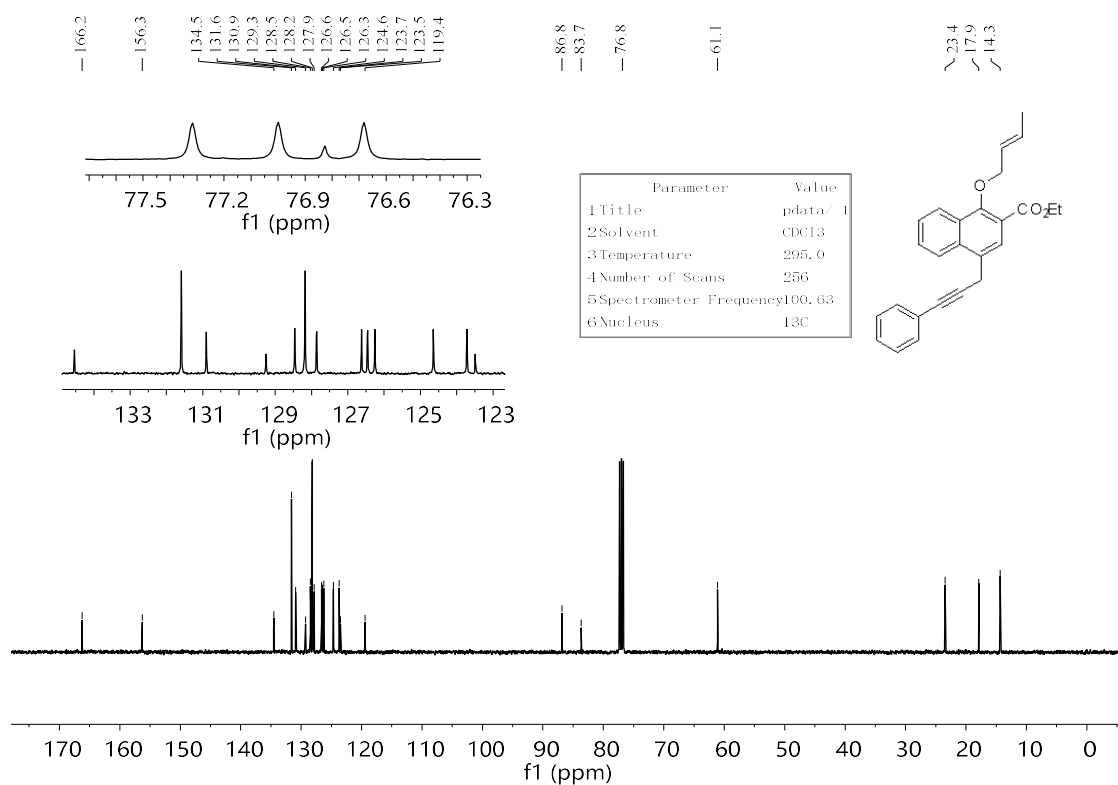

**Ethyl (E)-1-(hex-2-en-1-yloxy)-4-(3-phenylprop-2-yn-1-yl)-2-naphthoate (A36)**

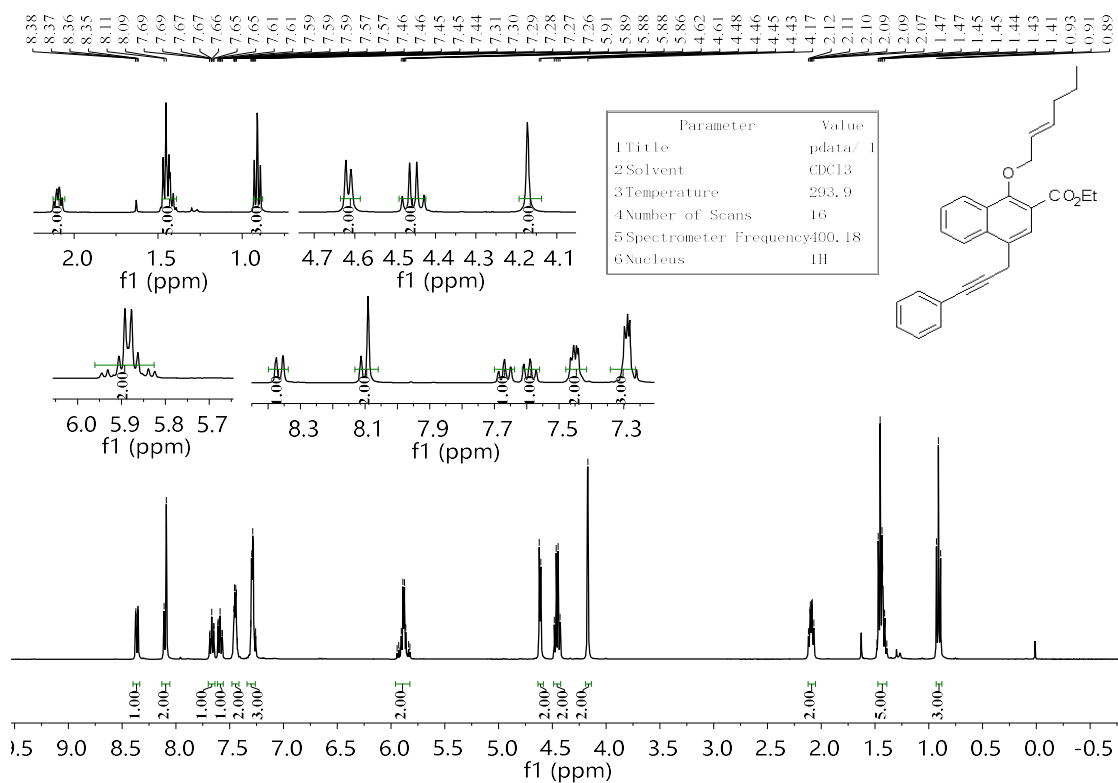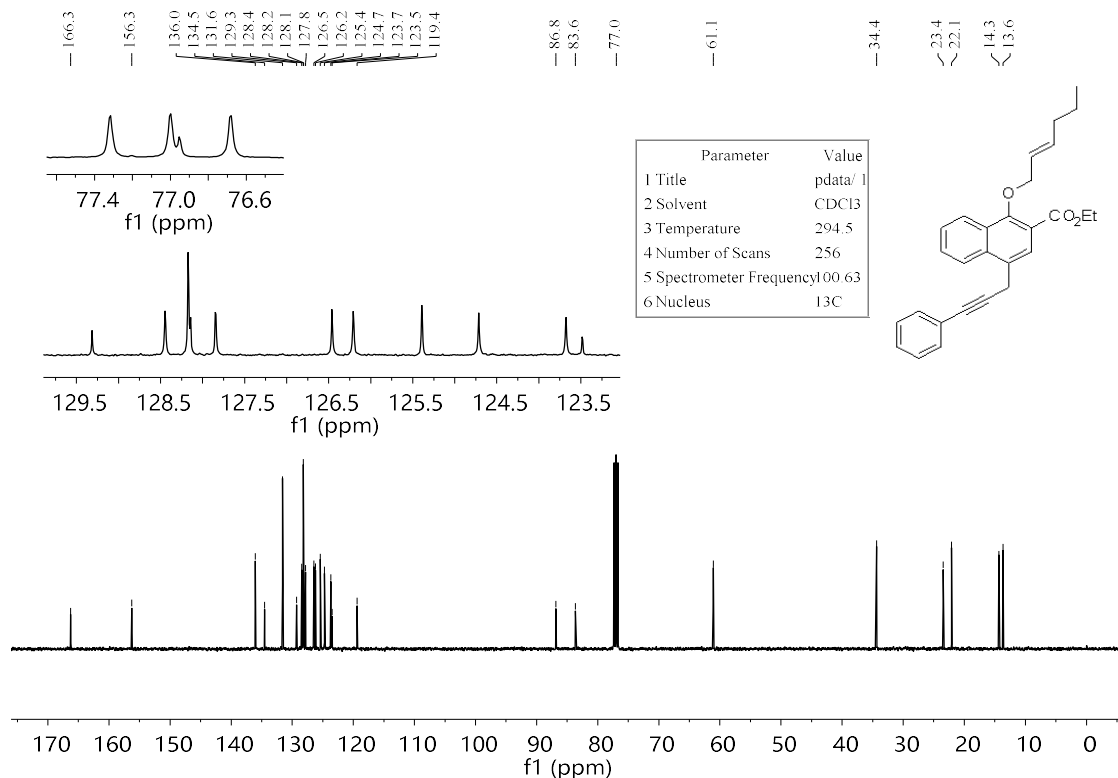



**Ethyl (E)-1-((3-cyclohexylallyl)oxy)-4-(3-phenylprop-2-yn-1-yl)-2-naphthoate (A37)**

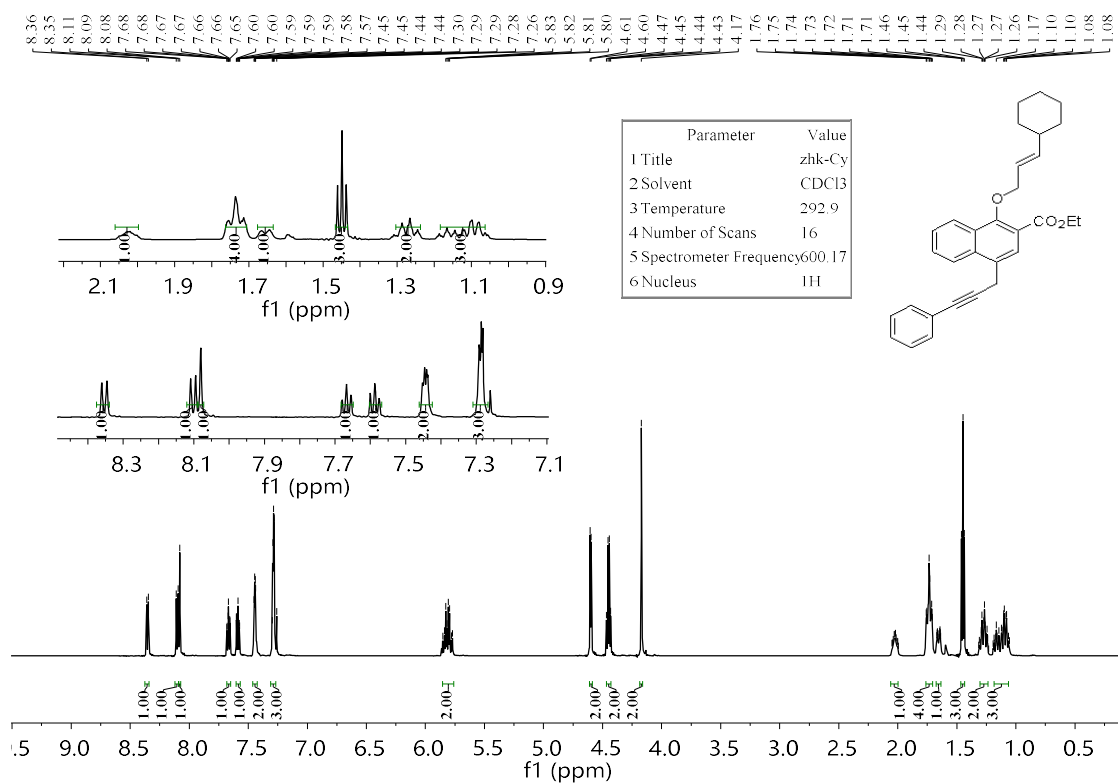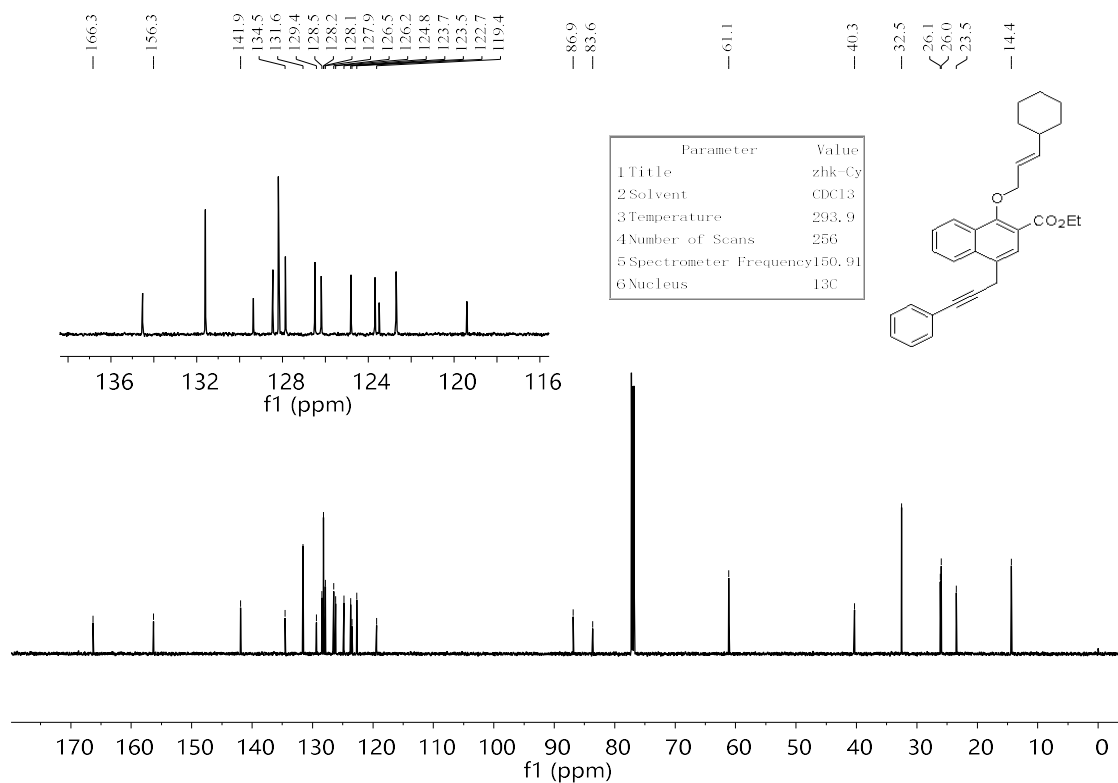

**Ethyl 4-((E)-3-(4-bromophenyl)allyl)-1-(cinnamyloxy)-2-naphthoate (A38)**

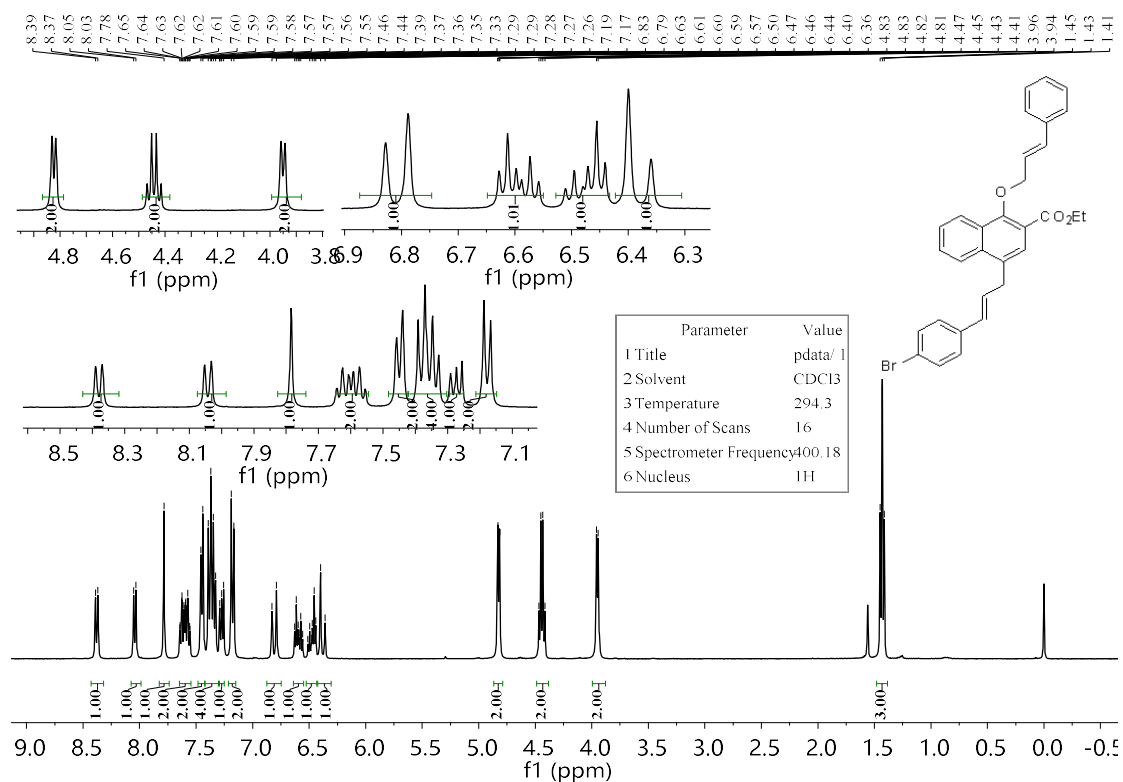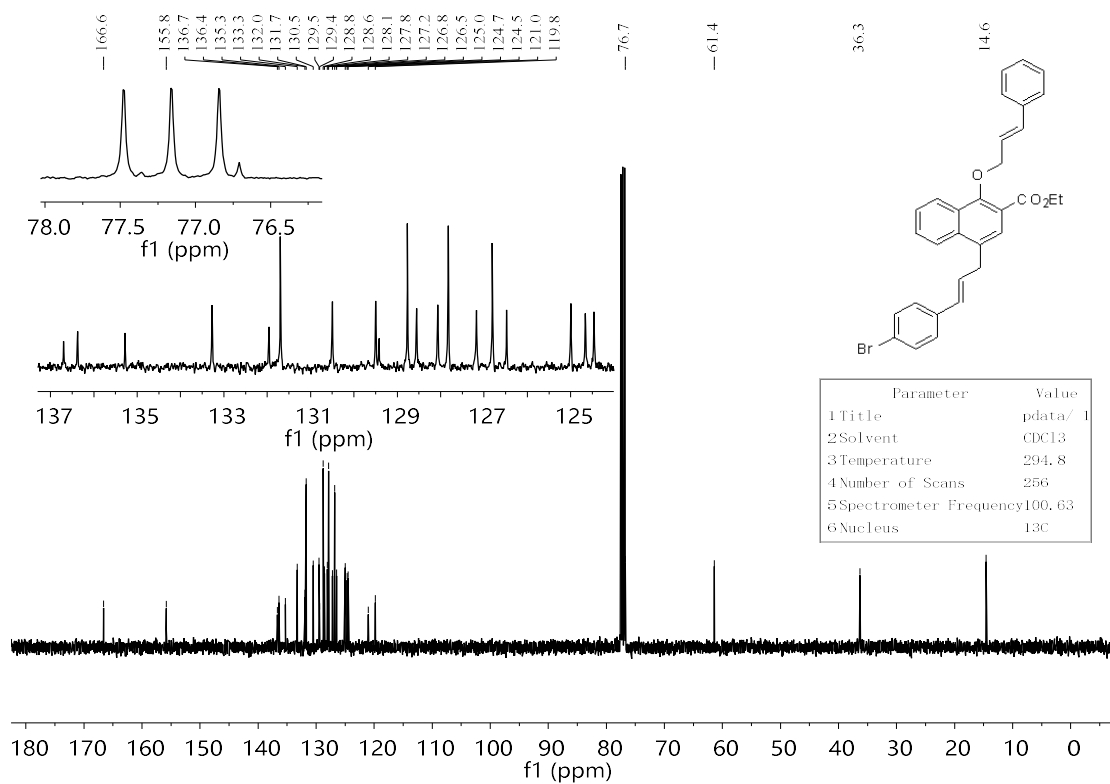

**Ethyl 1-(((E)-3-(4-bromophenyl)allyl)oxy)-4-cinnamyl-2-naphthoate (*ent*-A38)**

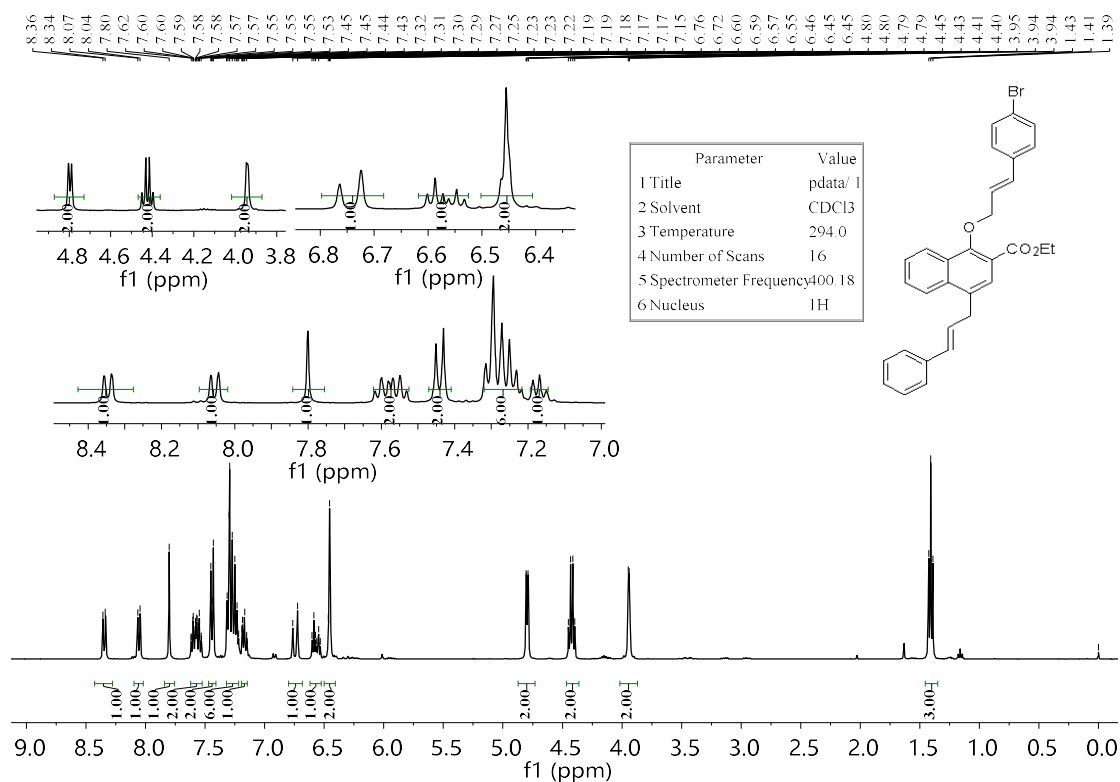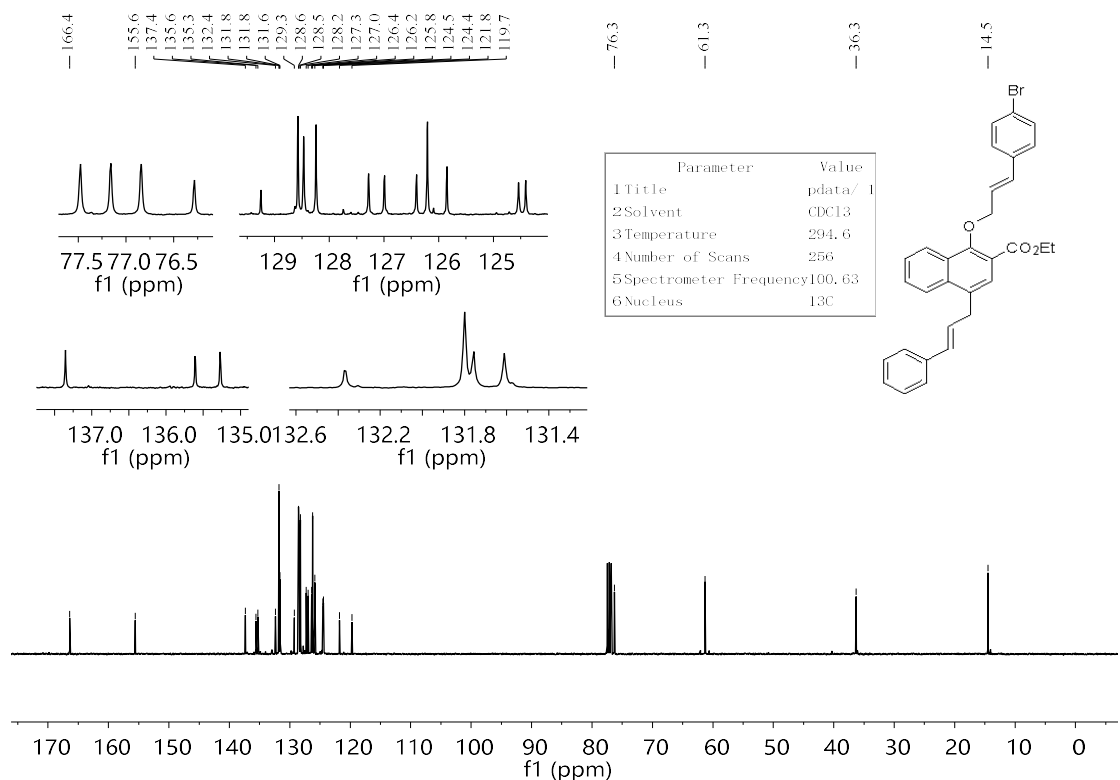

**Ethyl 1-(cinnamyloxy)-4-((E)-3-(naphthalen-1-yl)allyl)-2-naphthoate (A39)**

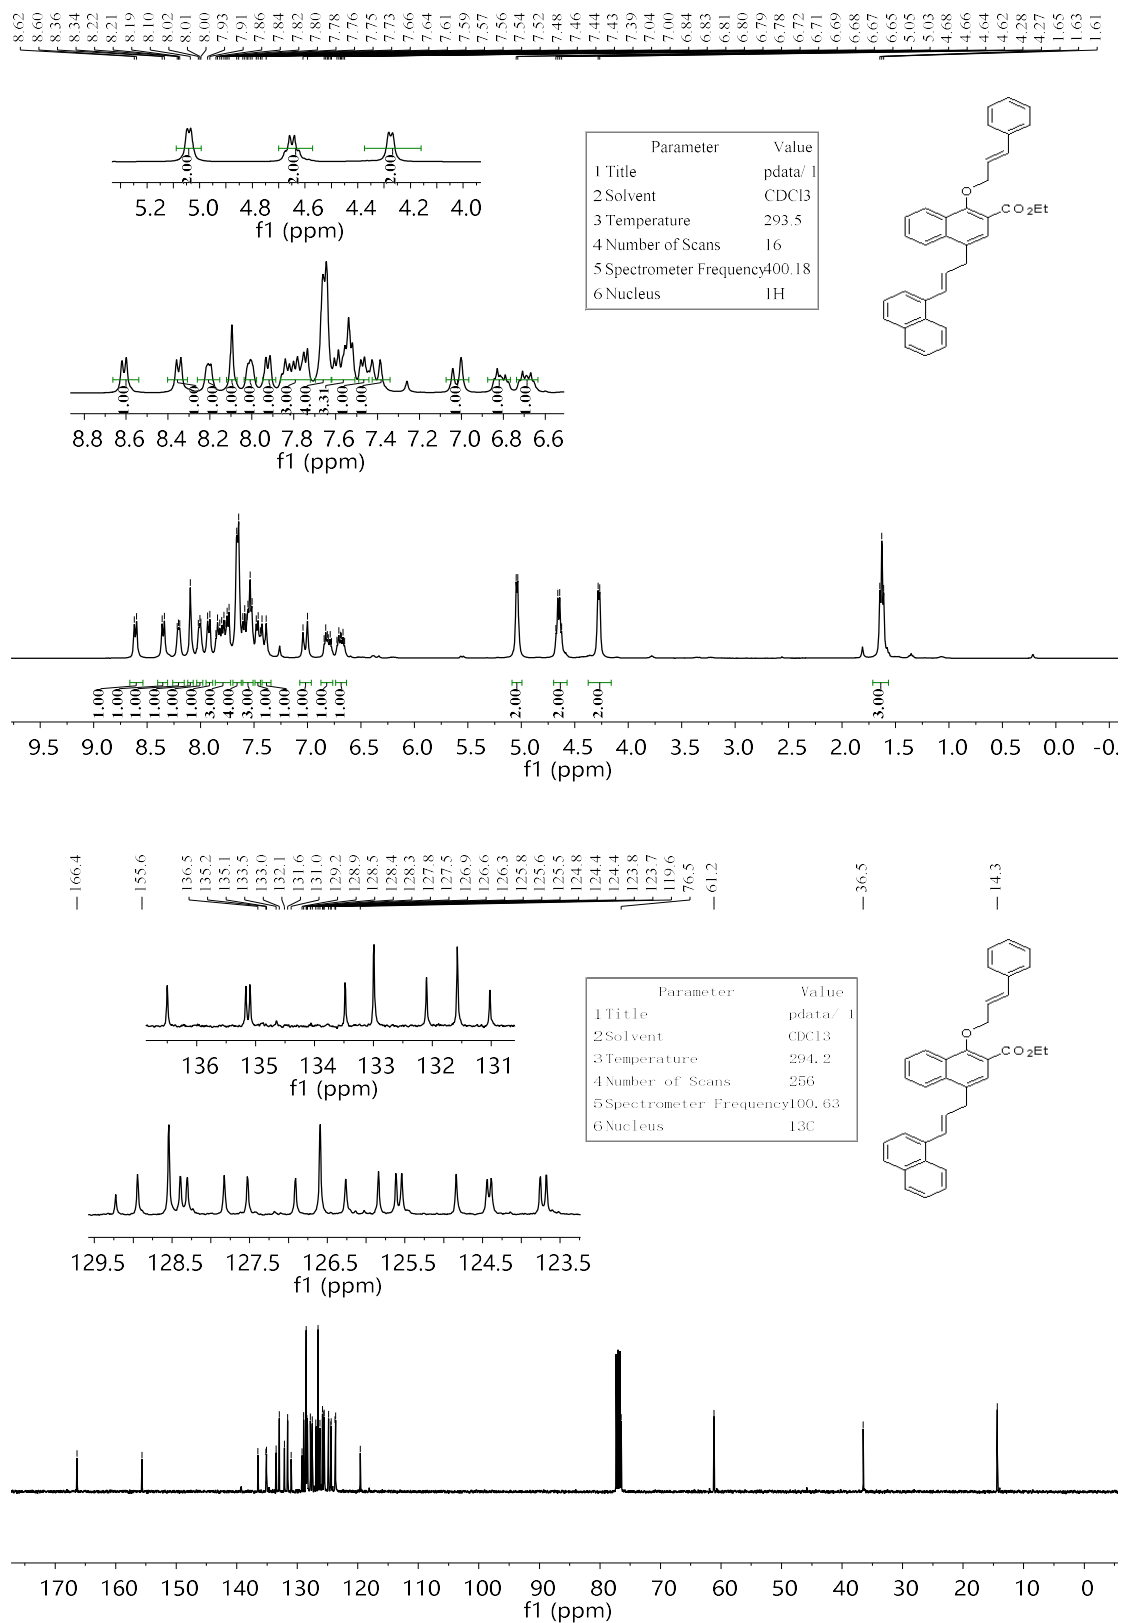

**Ethyl 4-cinnamyl-1-(((E)-3-(naphthalen-1-yl)allyl)oxy)-2-naphthoate (*ent*-A39)**

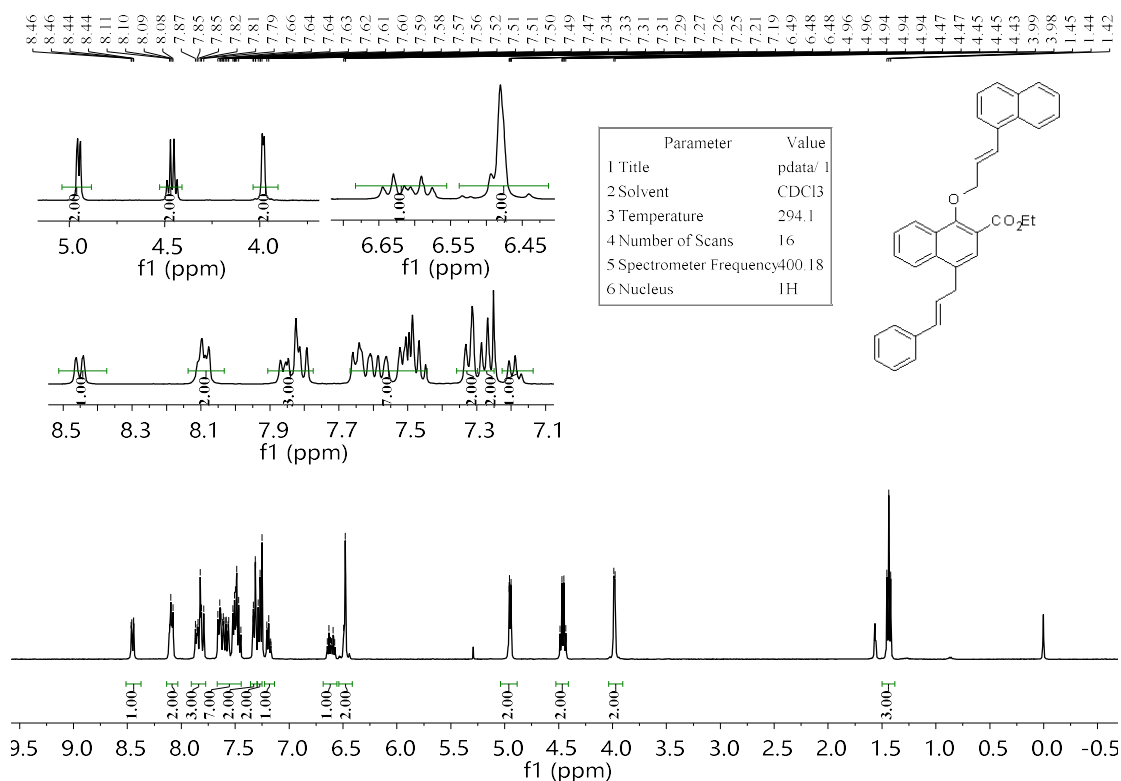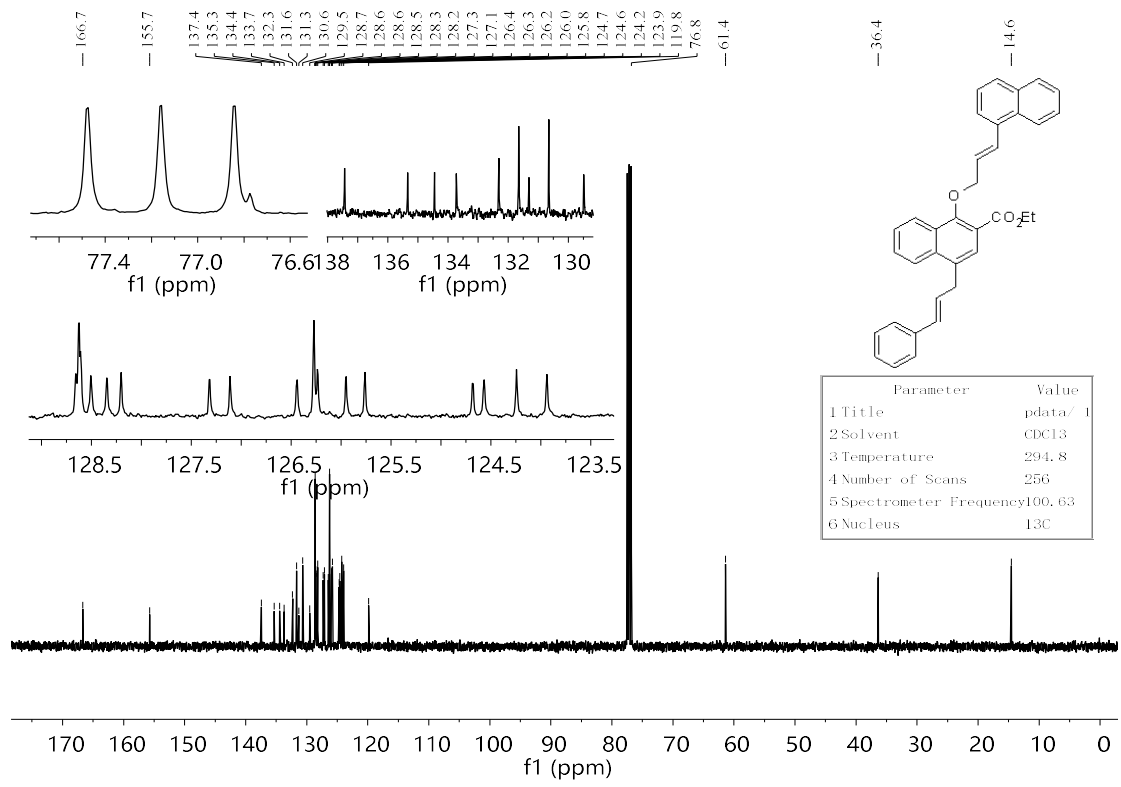

**Ethyl 4-((E)-but-2-en-1-yl)-1-(cinnamyloxy)-2-naphthoate (A40)**

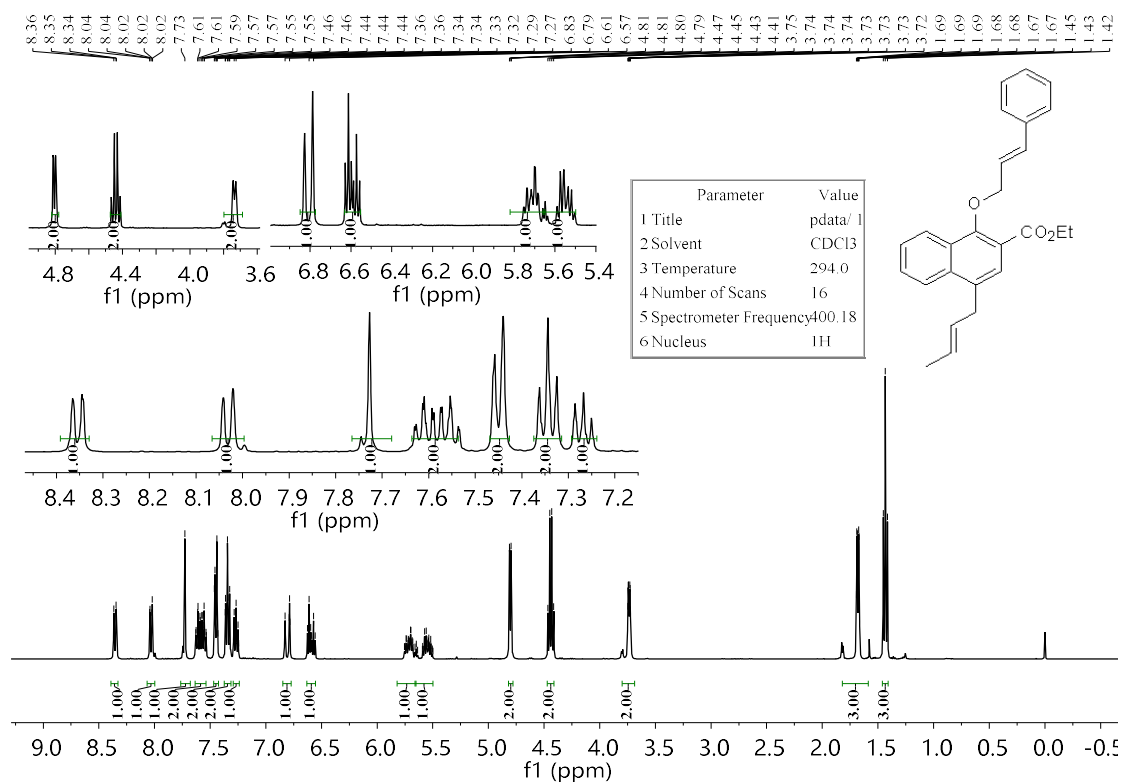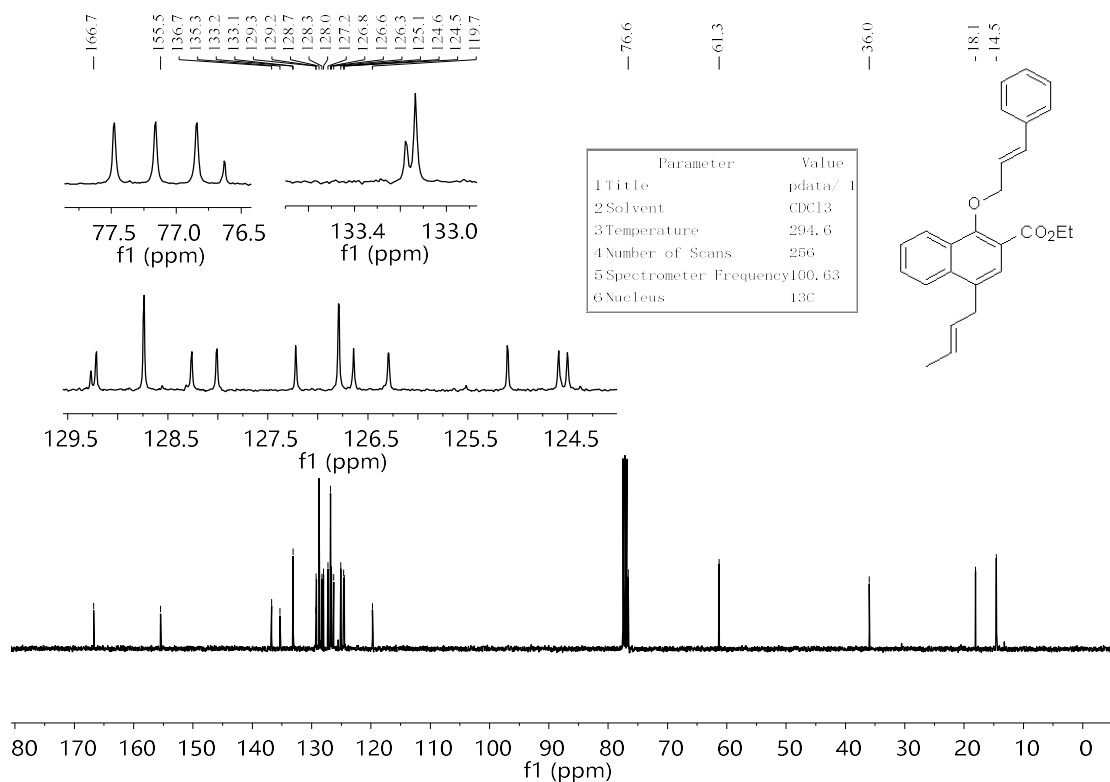

**Ethyl 1-((E)-but-2-en-1-yl)oxy-4-cinnamyl-2-naphthoate (*ent*-A40)**

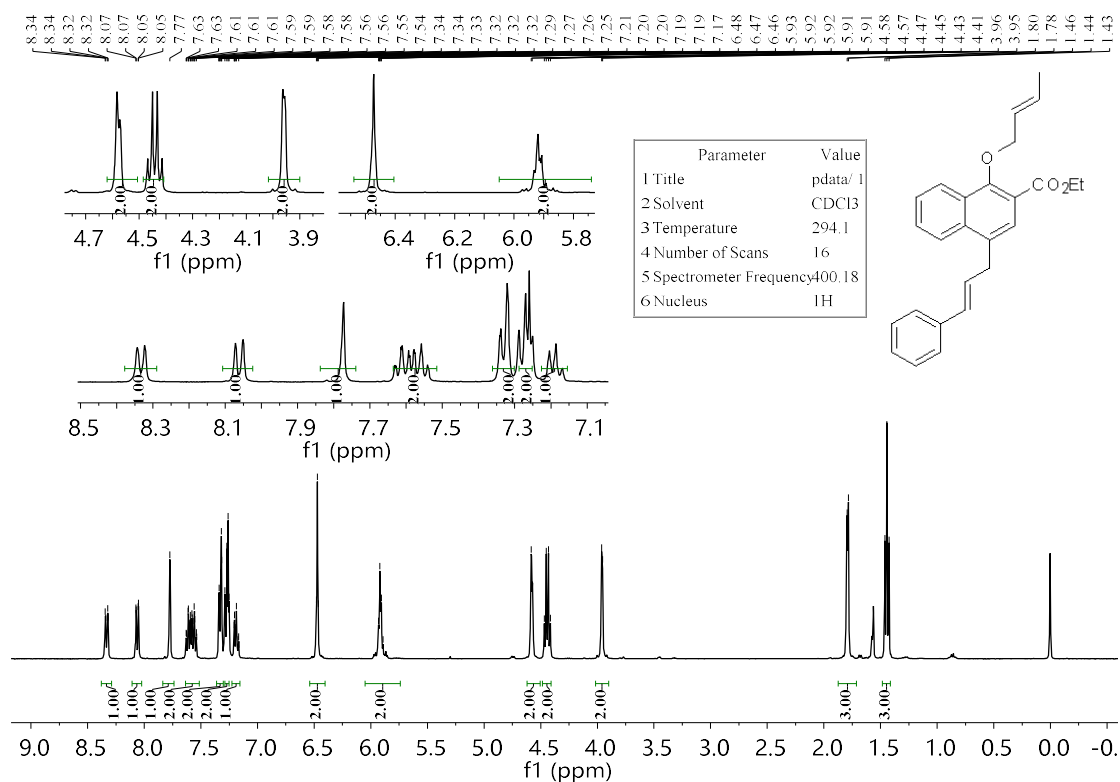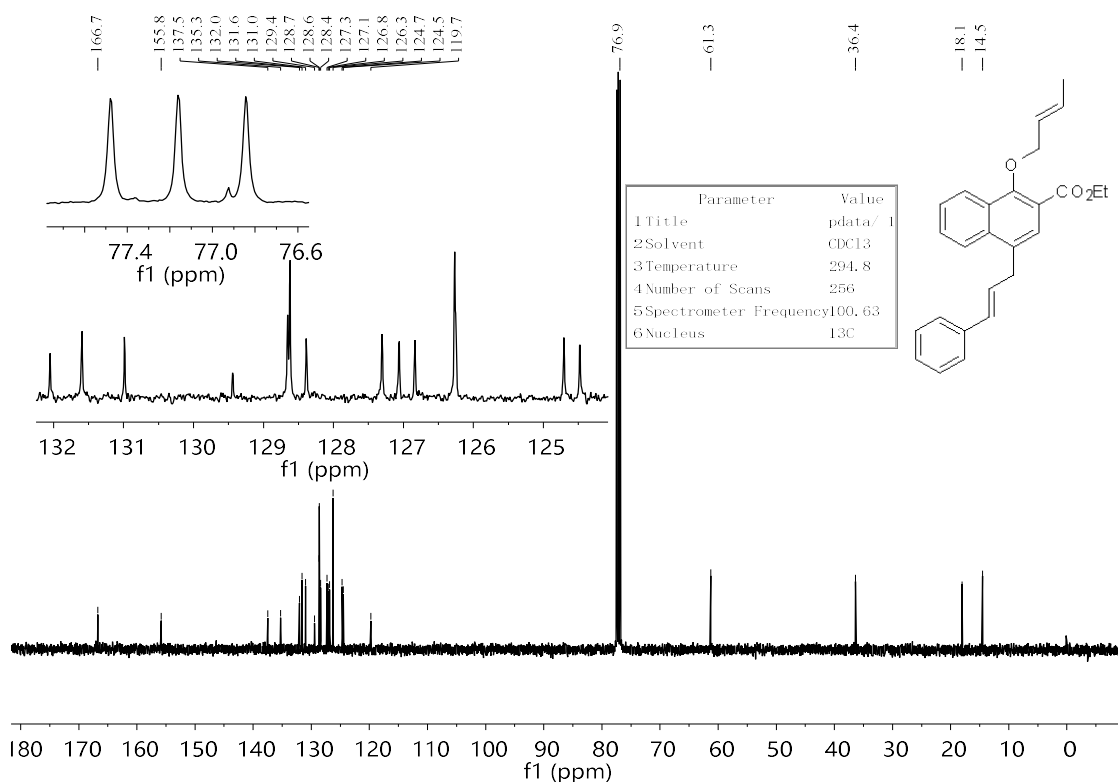

# 1-chloro-4-(cinnamyloxy)naphthalene (A41)

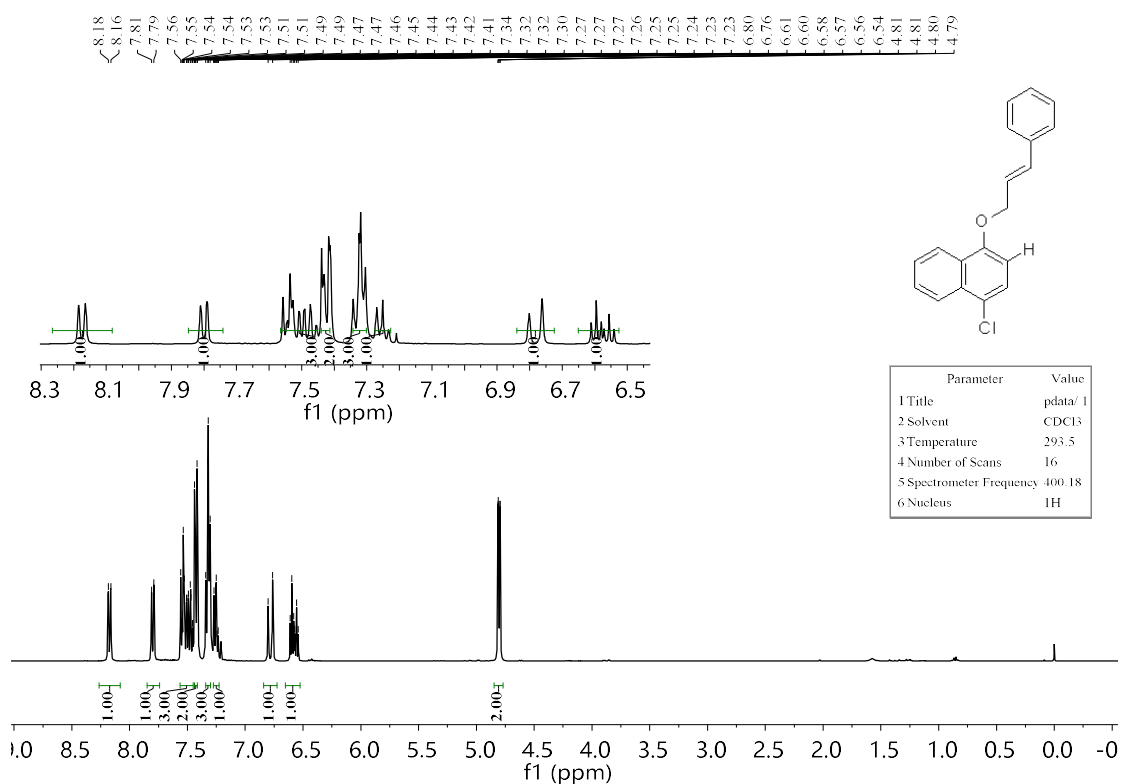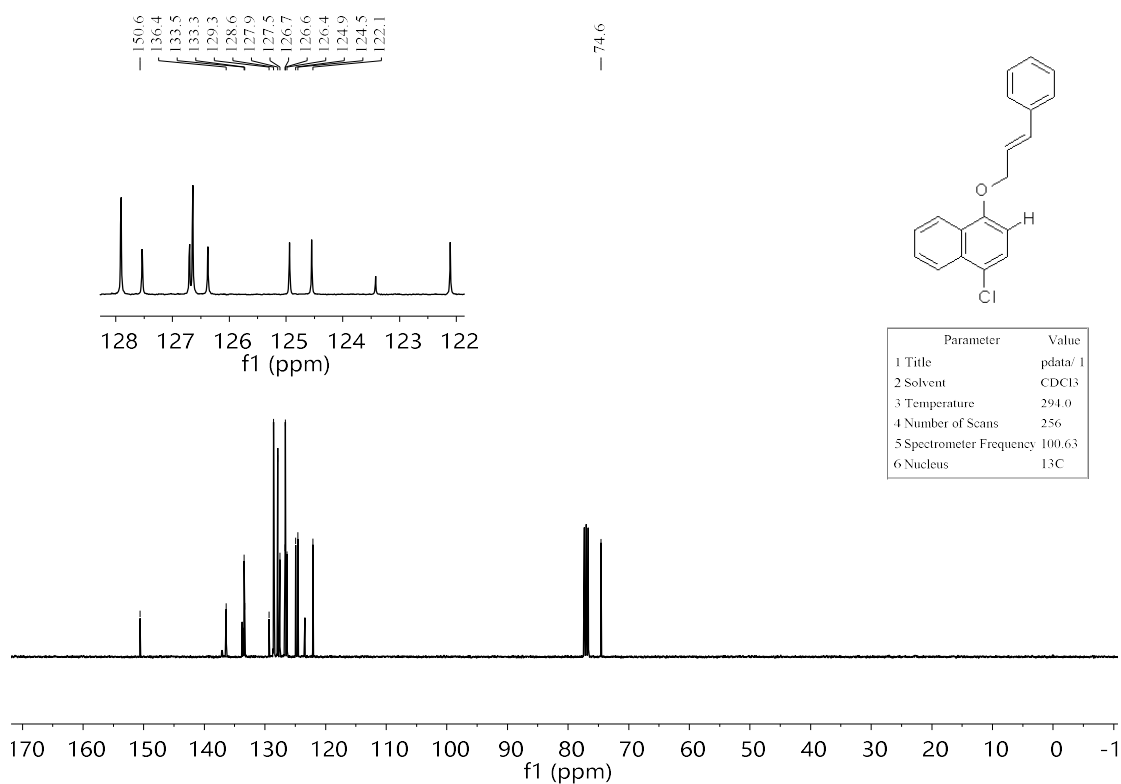



### 4-benzyl-1-(cinnamyloxy)-2-naphthonitrile (A43)

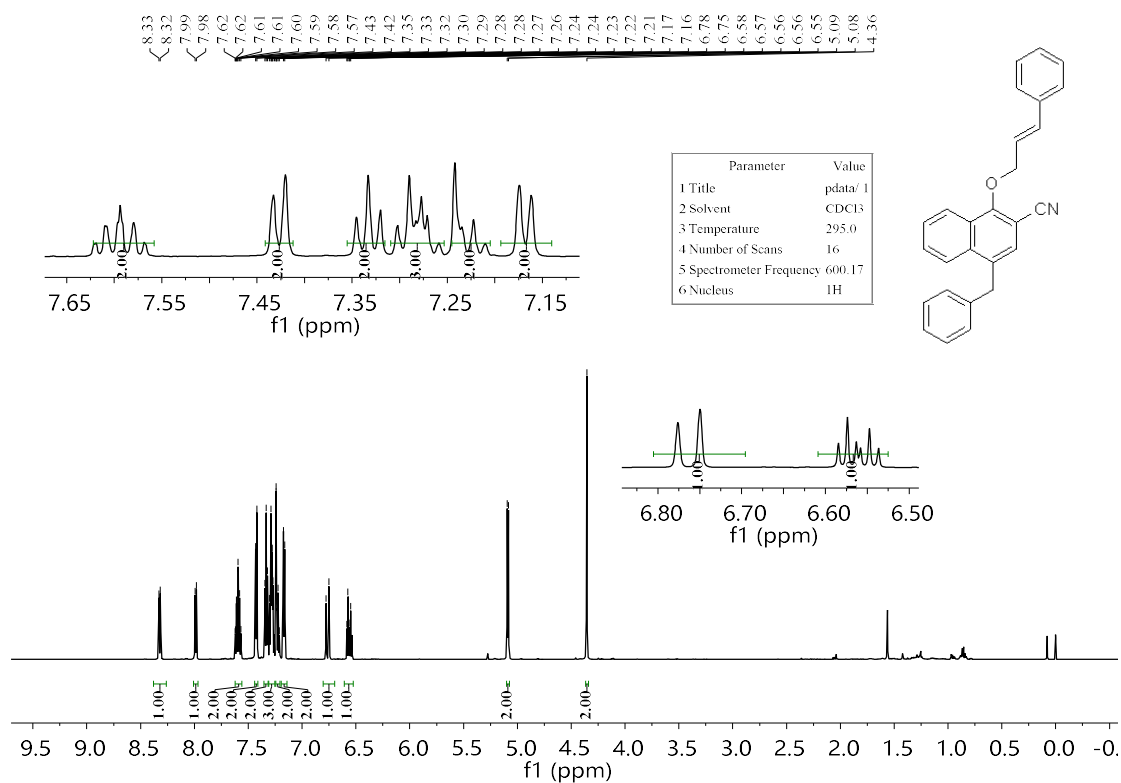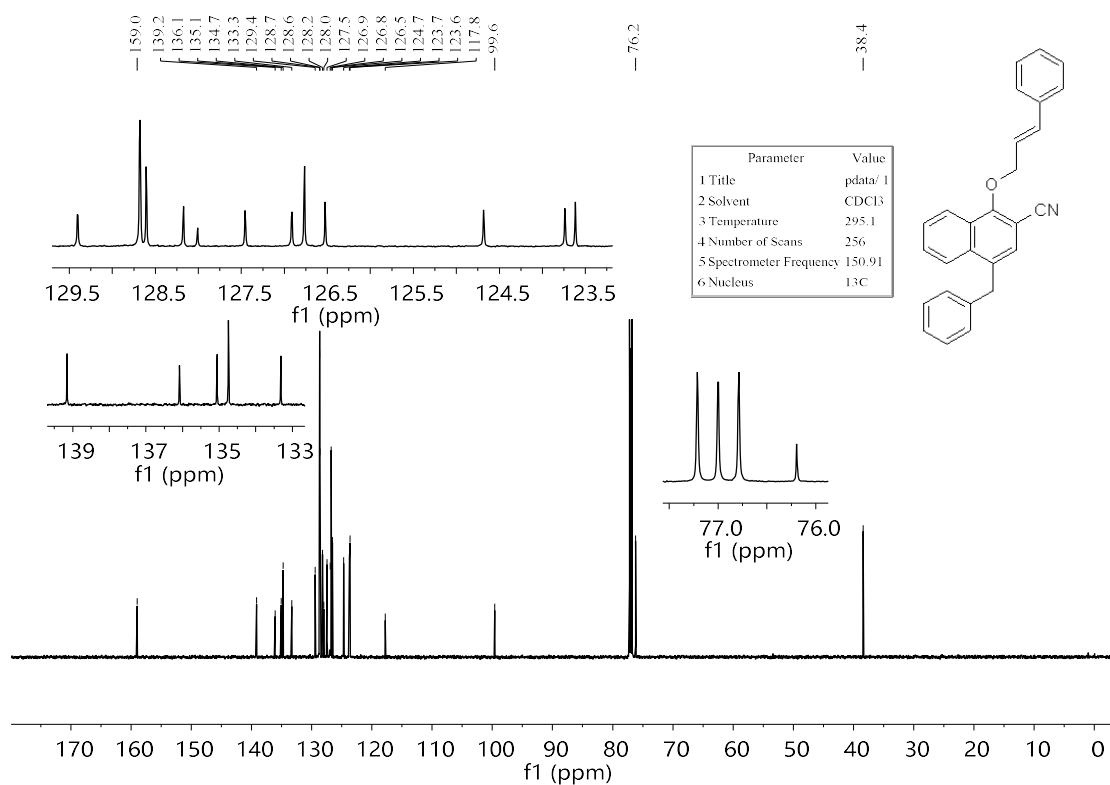

### 4-chloro-1-(cinnamyloxy)-2-naphthaldehyde (A44)

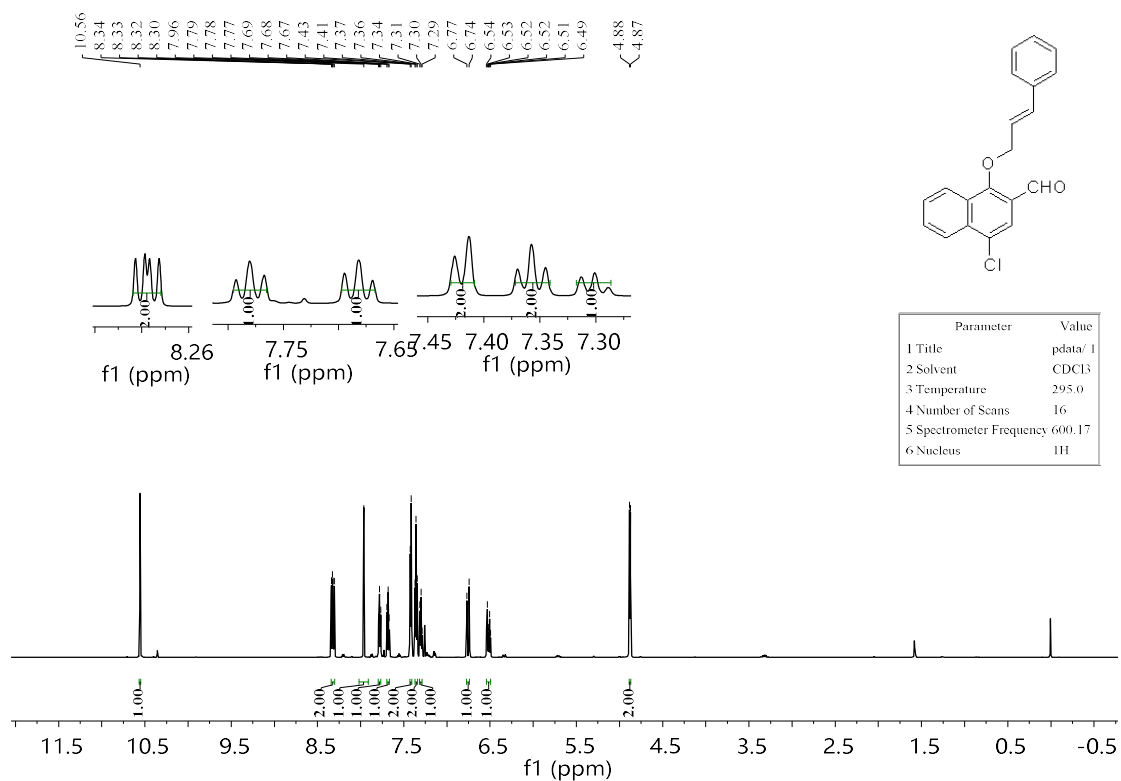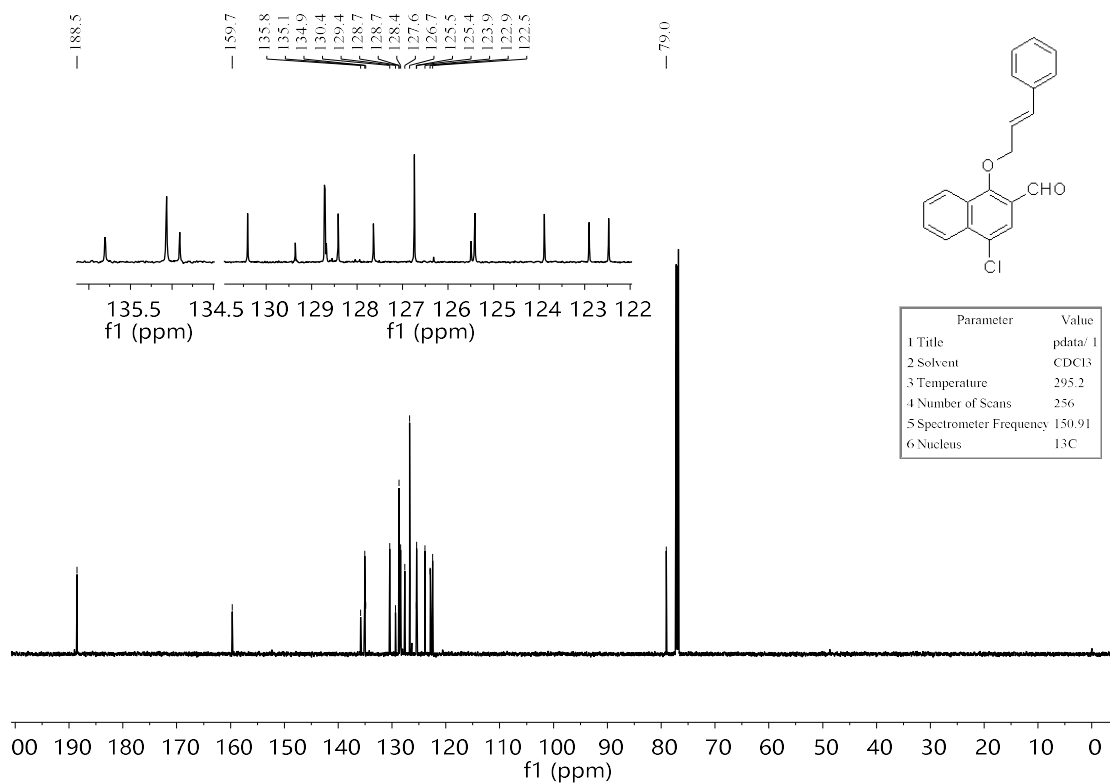

**1-(1-(cinnamyloxy)-4-(3-phenylprop-2-yn-1-yl)naphthalen-2-yl)ethan-1-one (A45)**

8.35 8.35 8.33 8.33 8.16 8.14 7.93 7.93 7.92 7.71 7.71 7.70 7.70 7.69 7.69 7.68 7.68 7.67 7.67 7.65 7.65 7.63 7.63 7.62 7.62 7.62 7.61 7.61 7.60 7.60 7.46 7.46 7.45 7.45 7.44 7.44 7.43 7.43 7.38 7.38 7.36 7.36 7.35 7.35 7.34 7.34 7.31 7.31 7.30 7.30 7.29 7.29 7.29 7.28 7.28 7.28 7.26 7.26 6.84 6.84 6.80 6.80 6.57 6.57 6.55 6.55 6.54 6.54 6.53 6.53 6.51 6.51 6.50 6.50 4.74 4.74 4.74 4.73 4.73 4.18 4.18 2.81 2.81

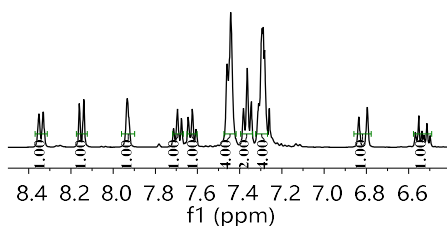

| Parameter                | Value    |
|--------------------------|----------|
| 1 Title                  | pdata/ 1 |
| 2 Solvent                | CDCl3    |
| 3 Temperature            | 294.0    |
| 4 Number of Scans        | 16       |
| 5 Spectrometer Frequency | 400.18   |
| 6 Nucleus                | 1H       |

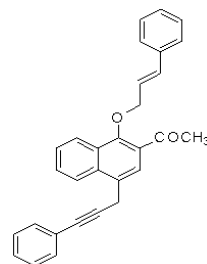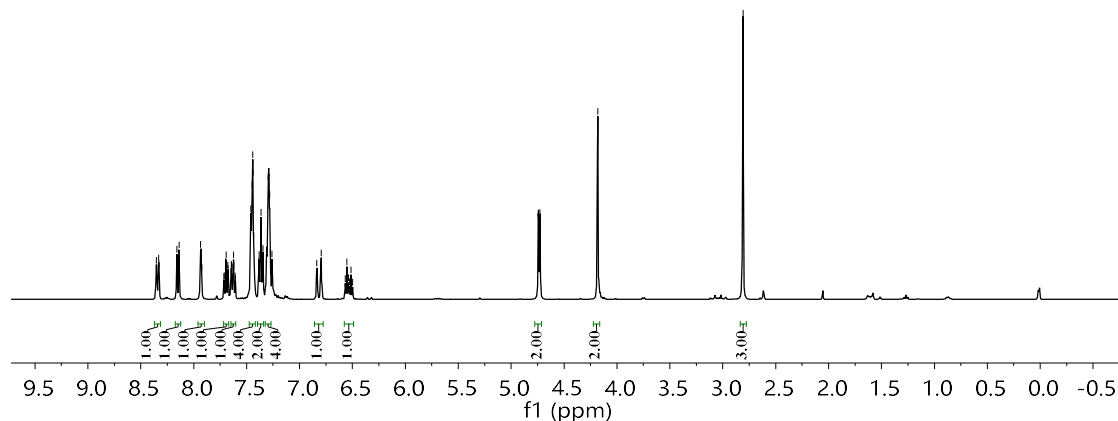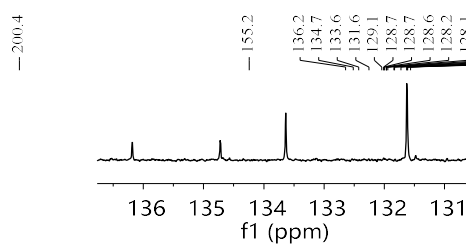

| Parameter                | Value    |
|--------------------------|----------|
| 1 Title                  | pdata/ 1 |
| 2 Solvent                | CDCl3    |
| 3 Temperature            | 294.6    |
| 4 Number of Scans        | 256      |
| 5 Spectrometer Frequency | 100.63   |
| 6 Nucleus                | 13C      |

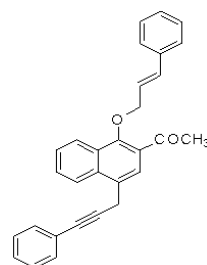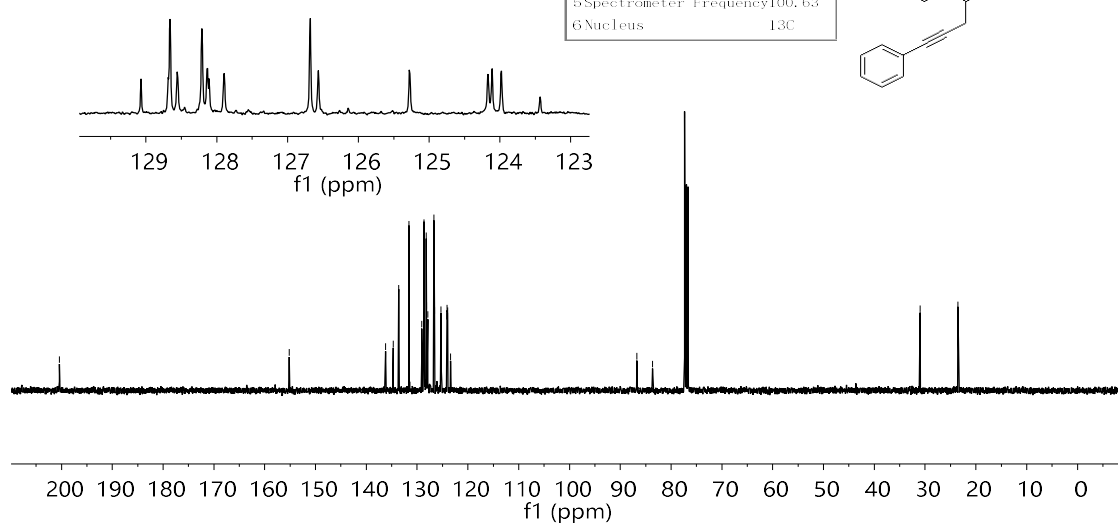

## 18. Reference

1. a) Y. H. Wen, X. Huang, J. L. Huang, Y. Xiong, B. Qin and X. M. Feng, *Synlett.*, 2005, 2445–2448; b) X. Li, X. H. Liu, Y. Z. Fu, L. J. Wang, L. Zhou and X. M. Feng, *J. Org. Chem.*, 2007, **72**, 204–208.
2. a) T. Lu, Y. T. Jiang, F. P. Ma, Z. J. Tang, L. Kuang, Y.-X. Wang and B. Wang, *Org. Lett.*, 2017, **19**, 6344–6347; b) L. F. Wang, Y. Q. Z, Z. S. Su, F. C. Zhang, W. D. Cao, X. H. Liu and X. M. Feng, *Angew. Chem. Int. Ed.*, 2022, **61**, e202211785.
